# Supplementary material for: Comprehensive analysis of BTNL9 as a prognostic biomarker correlated with immune infiltrations in thyroid cancer
Source: BMC Med Genomics. 2023 Oct 5;16:234. doi: 10.1186/s12920-023-01676-8 (PMC10552425; doi:10.1186/s12920-023-01676-8)
Supplement: Supplementary file 1 — Supplementary Material 1 [file 12920_2023_1676_MOESM1_ESM.xlsx]

## Sheet: Sheet 1 
Correlation between BTNL9 expression and chemokines/cytokines in thyroid cancer
Immune cells	Gene markers	Thyroid cancer
		None		Purity-adjusted
		Cor	p	Cor	p
T cell (general)	CD3D	-0.409	***	-0.416	***
	CD3E	-0.385	***	-0.39	***
	CD2	-0.428	***	-0.434	***
CD8+ T cell	CD8A	-0.12	**	-0.137	**
	CD8B	-0.259	***	-0.274	***
	ADRM1	0.247	***	0.233	***
	AHSA1	0.233	***	0.243	***
	CD37	-0.405	***	-0.406	***
	CETN3	0.271	***	0.269	***
	CSE1L	-0.123	**	-0.107	*
	IL2RB	-0.347	***	-0.341	***
B cell	CD19	-0.257	***	-0.259	***
	CD79A	-0.35	***	-0.346	***
Monocyte	CD86	-0.453	***	-0.451	***
	CD115 (CSF1R)	-0.314	***	-0.314	***
TAM	CCL2	-0.305	***	-0.306	***
	CD68	-0.41	***	-0.402	***
	IL10	-0.247	***	-0.232	***
M1 Macrophage	INOS (NOS2)	0.191	***	0.191	***
	IRF5	-0.371	***	-0.372	***
	COX2(PTGS2)	-0.449	***	-0.452	***
M2 Macrophage	CD163	-0.243	***	-0.23	***
	VSIG4	-0.321	***	-0.32	***
	MS4A4A	-0.291	***	-0.28	***
Neutrophils	CD66b (CEACAM8)	-0.336	***	-0.333	***
	CD11b (ITGAM)	-0.473	***	-0.47	***
	CCR7	-0.389	***	-0.384	***
Natural killer cell	KIR2DL1	0.144	**	0.127	**
	KIR2DL3	0.026	0.565	0.027	0.549
	KIR2DL4	0.159	***	0.16	***
	KIR3DL1	0.147	***	0.142	***
	KIR3DL2	-0.033	0.457	-0.029	0.524
	KIR3DL3	-0.122	**	-0.219	**
	KIR2DS4	0.089	*	0.09	*
Dendritic cell	HLA-DPB1	-0.519	***	-0.52	***
	HLA-DQB1	-0.473	***	-0.479	***
	HLA-DRA	-0.548	***	-0.545	***
	HLA-DPA1	-0.523	***	-0.527	***
	BDCA-1(CD1C)	-0.511	***	-0.508	***
	BDCA-4(NRP1)	0.385	***	0.389	***
	CD11c (ITGAX)	-0.405	***	-0.401	***
Th1	T-bet (TBX21)	-0.056	0.211	-0.065	0.153
	STAT4	-0.388	***	-0.3993	***
	STAT1	-0.466	***	-0.454	***
	IFN-γ (IFNG)	-0.256	***	-0.261	***
	TNF-α (TNF)	-0.205	***	-0.193	***
	IL12A	0.17	***	0.164	***
	IL12B	-0.338	***	-0.33	***
Th2	GATA3	-0.199	***	-0.188	***
	STAT6	-0.049	0.266	-0.034	0.449
	STAT5A	-0.263	***	-0.255	***
	IL13	-0.14	**	-0.127	**
Tfh	BCL6	-0.094	*	-0.072	0.11
	IL21	-0.135	**	-0.148	**
Th17	STAT3	-0.139	**	-0.117	**
	IL17A	-0.22	***	-0.221	***
Treg	FOXP3	-0.521	***	-0.526	***
	CCR8	-0.399	***	-0.399	***
	STAT5B	0.224	***	0.23	***
	TGFβ (TGFB1)	0.049	0.272	0.054	0.236
T cell exhaustion	PD-1 (PDCD1)	-0.128	**	-0.158	***
	CTLA4	-0.489	***	-0.49	***
	LAG3	-0.351	***	-0.362	***
	TIM-3 (HAVCR2)	-0.43	***	-0.426	***
	GZMB	-0.185	***	-0.193	***
Note. Cor, value of Spearman’s correlation coefficient; None, correlation without purity adjustment. Purity, correlation adjusted by purity; TAM, tumor-associated macrophage; Th, T helper cell; Tfh, Follicular helper T cell; Treg, regulatory T cell. *p value< 0.05; ** p value < 0.01; *** p value < 0.001.
