# Supplementary material for: Comprehensive analysis of BTNL9 as a prognostic biomarker correlated with immune infiltrations in thyroid cancer
Source: BMC Med Genomics. 2023 Oct 5;16:234. doi: 10.1186/s12920-023-01676-8 (PMC10552425; doi:10.1186/s12920-023-01676-8)
Supplement: Supplementary file 2 — Supplementary Material 2 [file 12920_2023_1676_MOESM2_ESM.xlsx]

## Sheet: Genes co-related with BTNL9
Query	Statistic	P-value	FDR (BH)	Event_SD	Event_TD
A1BG	-0.084171	0.0597495	0.0825907	501	501
A1CF	0.0691165	0.122341	0.159208	501	41
A2BP1	0.267026	1.25917e-09	3.84957e-09	501	449
A2LD1	-0.249086	1.59808e-08	4.43276e-08	501	501
A2ML1	0.11721	0.00863885	0.0135655	501	270
A2M	0.557453	3.01237e-42	1.07576e-40	501	501
A4GALT	-0.0139146	0.756039	0.796531	501	501
A4GNT	0.0919372	0.0396813	0.0565332	501	355
AAA1	-0.309126	1.48459e-12	5.75552e-12	501	87
AAAS	0.350446	6.36275e-16	3.14149e-15	501	501
AACSL	0.159401	0.00034112	0.000633858	501	145
AACS	0.338456	6.82041e-15	3.13374e-14	501	501
AADACL2	0.00490012	0.91288	0.929153	501	35
AADACL3	-0.0694052	0.120784	0.157384	501	25
AADACL4	-0.126981	0.00441819	0.00719997	501	109
AADAC	0.176303	7.26455e-05	0.000144659	501	181
AADAT	0.15515	0.000491798	0.000897277	501	501
AAGAB	0.257774	4.78223e-09	1.39341e-08	501	501
AAK1	0.457688	2.62013e-27	2.99205e-26	501	501
AAMP	0.171657	0.000112784	0.000219907	501	501
AANAT	0.403449	4.92234e-21	3.56941e-20	501	392
AARS2	-0.223749	4.19348e-07	1.03203e-06	501	501
AARSD1	0.239267	5.9239e-08	1.56955e-07	501	501
AARS	0.164749	0.000212465	0.000403295	501	501
AASDHPPT	0.0330925	0.459869	0.521263	501	501
AASDH	0.137634	0.00201727	0.00342959	501	501
AASS	0.457685	2.62287e-27	2.99347e-26	501	501
AATF	-0.0348045	0.436971	0.498113	501	501
AATK	0.470302	6.16994e-29	7.98366e-28	501	501
ABAT	0.337085	8.8884e-15	4.04567e-14	501	501
ABCA10	0.302585	4.55819e-12	1.69809e-11	501	499
ABCA11P	0.227218	2.73984e-07	6.86235e-07	501	501
ABCA12	-0.612082	7.90972e-53	5.75244e-51	501	428
ABCA13	-0.0880329	0.0489133	0.0685729	501	500
ABCA17P	0.205248	3.62168e-06	8.20383e-06	501	501
ABCA1	0.0307916	0.491673	0.55266	501	501
ABCA2	0.265284	1.62512e-09	4.91332e-09	501	501
ABCA3	-0.00363819	0.935259	0.947527	501	501
ABCA4	-0.210635	1.97135e-06	4.55403e-06	501	501
ABCA5	0.429706	6.25838e-24	5.52796e-23	501	501
ABCA6	-0.123714	0.00555715	0.00893909	501	500
ABCA7	0.247588	1.959e-08	5.4038e-08	501	501
ABCA8	0.435665	1.26784e-24	1.18556e-23	501	501
ABCA9	-0.0321474	0.472792	0.534058	501	498
ABCB10	0.0322636	0.471192	0.532463	501	501
ABCB11	-0.09799	0.0282991	0.0412159	501	114
ABCB1	0.472373	3.28426e-29	4.3284e-28	501	501
ABCB4	0.126481	0.00457753	0.00744017	501	501
ABCB5	-0.0134151	0.764532	0.803779	501	203
ABCB6	0.400444	1.01739e-20	7.18921e-20	501	501
ABCB7	-0.249093	1.59658e-08	4.42921e-08	501	501
ABCB8	0.324213	1.0019e-13	4.21644e-13	501	501
ABCB9	-0.117674	0.00837718	0.0131785	501	501
ABCC10	0.0496819	0.267025	0.322251	501	501
ABCC11	0.210415	2.02148e-06	4.66497e-06	501	484
ABCC12	0.271889	6.11541e-10	1.92211e-09	501	232
ABCC13	-0.112503	0.01174	0.0181238	501	228
ABCC1	0.00154928	0.972406	0.977804	501	501
ABCC2	0.22156	5.46608e-07	1.33092e-06	501	482
ABCC3	-0.323091	1.23065e-13	5.15192e-13	501	501
ABCC4	0.0812038	0.0693631	0.0946841	501	501
ABCC5	0.080338	0.0723957	0.0985335	501	501
ABCC6P1	-0.342515	3.0905e-15	1.45486e-14	501	496
ABCC6P2	0.0586547	0.189953	0.237465	501	501
ABCC6	0.196473	9.42635e-06	2.05356e-05	501	501
ABCC8	0.513672	4.43025e-35	9.2152e-34	501	484
ABCC9	0.445649	8.13376e-26	8.30761e-25	501	501
ABCD1	0.131934	0.00308995	0.00514312	501	501
ABCD2	-0.210138	2.08654e-06	4.81176e-06	501	491
ABCD3	-0.0571651	0.201469	0.250385	501	501
ABCD4	0.242333	3.95894e-08	1.0622e-07	501	501
ABCE1	-0.217018	9.39279e-07	2.24129e-06	501	501
ABCF1	-0.0970117	0.0299225	0.0434469	501	501
ABCF2	-0.389395	1.37967e-19	8.94359e-19	501	501
ABCF3	0.213163	1.47371e-06	3.448e-06	501	501
ABCG1	0.191686	1.56092e-05	3.32491e-05	501	501
ABCG2	0.670403	1.13734e-66	2.00564e-64	501	501
ABCG4	-0.0244212	0.585523	0.641722	501	501
ABCG5	0.337589	8.06572e-15	3.68468e-14	501	375
ABCG8	0.0630255	0.15896	0.202195	501	67
ABHD10	0.457088	3.11994e-27	3.5506e-26	501	501
ABHD11	-0.0849068	0.0575442	0.0798303	501	501
ABHD12B	-0.219488	7.00751e-07	1.69197e-06	501	420
ABHD12	-0.288955	4.31934e-11	1.49016e-10	501	501
ABHD13	-0.134513	0.0025528	0.00428882	501	501
ABHD14A	0.489035	1.75382e-31	2.76054e-30	501	501
ABHD14B	0.301239	5.72187e-12	2.11422e-11	501	501
ABHD15	0.150145	0.000747802	0.00133765	501	501
ABHD1	0.450166	2.27743e-26	2.42464e-25	501	499
ABHD2	-0.164068	0.000225852	0.000427281	501	501
ABHD3	-0.383574	5.24021e-19	3.26624e-18	501	501
ABHD4	-0.0950197	0.0334759	0.0482095	501	501
ABHD5	-0.163924	0.000228789	0.000432715	501	501
ABHD6	0.447862	4.3699e-26	4.56628e-25	501	501
ABHD8	0.169748	0.000134685	0.000260519	501	501
ABI1	-0.436572	9.91698e-25	9.31679e-24	501	501
ABI2	0.00213466	0.961987	0.968793	501	501
ABI3BP	-0.0163796	0.714564	0.759304	501	501
ABI3	0.380831	9.73661e-19	5.94246e-18	501	501
ABL1	0.0188671	0.673547	0.722766	501	501
ABL2	-0.397667	1.97764e-20	1.37168e-19	501	501
ABLIM1	-0.315522	4.82257e-13	1.93398e-12	501	501
ABLIM2	0.250732	1.27606e-08	3.56883e-08	501	501
ABLIM3	-0.00556995	0.901029	0.919794	501	501
ABO	0.116441	0.00908924	0.0142368	501	501
ABP1	-0.135683	0.00233843	0.00394463	501	496
ABRA	0.116085	0.00930479	0.0145585	501	248
ABR	-0.497203	1.21225e-32	2.08606e-31	501	501
ABT1	0.0370833	0.40753	0.469007	501	501
ABTB1	-0.13183	0.00311346	0.00517935	501	501
ABTB2	-0.559196	1.48341e-42	5.43379e-41	501	501
ACAA1	0.181451	4.40304e-05	8.9658e-05	501	501
ACAA2	-0.0311773	0.48626	0.547472	501	501
ACACA	0.142743	0.00135786	0.00235329	501	501
ACACB	0.58916	3.83339e-48	1.97897e-46	501	501
ACAD10	0.472626	3.04033e-29	4.02555e-28	501	501
ACAD11	0.48414	8.40622e-31	1.25195e-29	501	501
ACAD8	0.21755	8.821e-07	2.11219e-06	501	501
ACAD9	0.00627455	0.888586	0.909816	501	501
ACADL	0.0118151	0.79193	0.827339	501	501
ACADM	0.280897	1.54428e-10	5.09149e-10	501	501
ACADSB	0.294813	1.66725e-11	5.93379e-11	501	501
ACADS	0.298026	9.801e-12	3.55164e-11	501	501
ACADVL	0.287368	5.56981e-11	1.90507e-10	501	501
ACAN	0.127472	0.00426663	0.00696437	501	500
ACAP1	-0.376903	2.34072e-18	1.3882e-17	501	501
ACAP2	0.0636347	0.154962	0.197501	501	501
ACAP3	0.0608182	0.174098	0.219476	501	501
ACAT1	0.180236	4.96162e-05	0.000100488	501	501
ACAT2	-0.139074	0.00180666	0.00308679	501	501
ACBD3	-0.223464	4.34122e-07	1.06747e-06	501	501
ACBD4	0.217418	8.95996e-07	2.14391e-06	501	501
ACBD5	0.301033	5.92418e-12	2.18613e-11	501	501
ACBD6	-0.152237	0.000628625	0.00113342	501	501
ACBD7	-0.421572	5.25948e-23	4.35782e-22	501	501
ACCN1	-0.0678323	0.129457	0.16761	501	351
ACCN2	0.217801	8.563e-07	2.05312e-06	501	501
ACCN3	0.251345	1.17284e-08	3.29587e-08	501	495
ACCN4	-0.0955925	0.032419	0.0467786	501	228
ACCN5	0.116901	0.00881741	0.0138344	501	35
ACCSL	0.0649027	0.146885	0.188194	501	15
ACCS	0.234005	1.16829e-07	3.0156e-07	501	501
ACD	-0.00339129	0.939643	0.950616	501	501
ACE2	-0.123645	0.00558353	0.00897861	501	501
ACER1	0.0430714	0.335996	0.395499	501	263
ACER2	-0.251302	1.1799e-08	3.31293e-08	501	501
ACER3	-0.0457486	0.306795	0.364746	501	501
ACE	0.584812	2.69493e-47	1.31946e-45	501	501
ACHE	0.229306	2.11379e-07	5.34197e-07	501	501
ACIN1	0.0901334	0.0437451	0.0618926	501	501
ACLY	-0.0337424	0.451099	0.512196	501	501
ACMSD	-0.0421622	0.346305	0.406385	501	320
ACN9	0.359116	1.07329e-16	5.58272e-16	501	501
ACO1	-0.0848408	0.0577392	0.0800562	501	501
ACO2	0.0967786	0.0303209	0.0439709	501	501
ACOT11	0.245876	2.46786e-08	6.74396e-08	501	501
ACOT12	-0.0741961	0.0971416	0.129024	501	319
ACOT13	0.132339	0.00299921	0.00499918	501	501
ACOT1	0.309834	1.31252e-12	5.10434e-12	501	501
ACOT2	0.254483	7.59269e-09	2.1726e-08	501	501
ACOT4	-0.0889218	0.0466671	0.0656548	501	501
ACOT6	0.393506	5.29023e-20	3.54705e-19	501	442
ACOT7	-0.501929	2.49815e-33	4.50503e-32	501	501
ACOT8	0.0233029	0.602814	0.657954	501	501
ACOT9	-0.600228	2.33518e-50	1.44963e-48	501	501
ACOX1	-0.136098	0.0022664	0.0038296	501	501
ACOX2	0.496128	1.73009e-32	2.94662e-31	501	501
ACOX3	-0.167713	0.000162406	0.000311779	501	501
ACOXL	-0.0735441	0.100124	0.132613	501	500
ACP1	0.181465	4.39699e-05	8.95441e-05	501	501
ACP2	-0.222251	5.02886e-07	1.22821e-06	501	501
ACP5	-0.474854	1.53422e-29	2.07835e-28	501	501
ACP6	0.148815	0.000834048	0.0014842	501	501
ACPL2	0.318004	3.09475e-13	1.25907e-12	501	501
ACPP	-0.272563	5.52668e-10	1.74229e-09	501	501
ACPT	0.0725916	0.10461	0.138087	501	122
ACRBP	0.395984	2.94941e-20	2.01761e-19	501	501
ACRC	-0.128919	0.00384681	0.00632	501	501
ACRV1	0.173098	9.85173e-05	0.000193205	501	302
ACR	0.189472	1.96265e-05	4.13596e-05	501	493
ACSBG1	0.154159	0.000534879	0.000971519	501	499
ACSBG2	0.0466268	0.297593	0.355119	501	325
ACSF2	0.366368	2.32163e-17	1.27131e-16	501	501
ACSF3	0.307446	1.9854e-12	7.60391e-12	501	501
ACSL1	0.262224	2.5333e-09	7.54124e-09	501	501
ACSL3	0.306466	2.35068e-12	8.95982e-12	501	501
ACSL4	-0.251665	1.12223e-08	3.16068e-08	501	501
ACSL5	-0.28643	6.46674e-11	2.20203e-10	501	501
ACSL6	0.166906	0.000174807	0.000334747	501	486
ACSM1	-0.000370109	0.993407	0.994822	501	501
ACSM2A	0.108932	0.0147121	0.0223963	501	215
ACSM2B	0.0314355	0.482655	0.543936	501	141
ACSM3	0.229401	2.08876e-07	5.2814e-07	501	501
ACSM4	-0.0485392	0.278197	0.334376	501	10
ACSM5	0.438386	6.05222e-25	5.7677e-24	501	500
ACSS1	0.503507	1.46669e-33	2.70118e-32	501	501
ACSS2	0.116869	0.00883624	0.0138624	501	501
ACSS3	0.0675977	0.130791	0.169194	501	501
ACTA1	0.0893113	0.0457104	0.0644178	501	456
ACTA2	0.232829	1.35667e-07	3.48247e-07	501	501
ACTBL2	-0.67436	1.00225e-67	1.95802e-65	501	456
ACTB	-0.288854	4.39048e-11	1.51287e-10	501	501
ACTC1	0.0242928	0.587496	0.643483	501	481
ACTG1	-0.476994	7.91808e-30	1.09877e-28	501	501
ACTG2	0.189931	1.87198e-05	3.95703e-05	501	501
ACTL6A	-0.247174	2.07186e-08	5.69789e-08	501	501
ACTL6B	-0.03432	0.443384	0.504356	501	15
ACTL7A	0.0381208	0.394527	0.455912	501	44
ACTL7B	0.100844	0.0239879	0.0353398	501	143
ACTL8	-0.044062	0.32499	0.384017	501	27
ACTL9	-0.104513	0.0192899	0.028856	501	16
ACTN1	-0.413656	3.95109e-22	3.09122e-21	501	501
ACTN2	0.117363	0.00855208	0.0134356	501	440
ACTN3	-0.0827362	0.0642509	0.0883228	501	404
ACTN4	-0.259566	3.70765e-09	1.08907e-08	501	501
ACTR10	0.00427291	0.923995	0.938358	501	501
ACTR1A	-0.0828996	0.0637246	0.0876476	501	501
ACTR1B	-0.154307	0.00052826	0.000960196	501	501
ACTR2	-0.242635	3.80345e-08	1.02227e-07	501	501
ACTR3B	-0.0338798	0.449256	0.510366	501	501
ACTR3C	0.0899237	0.0442395	0.0625309	501	500
ACTR3	-0.371348	7.93049e-18	4.51904e-17	501	501
ACTR5	0.270721	7.28265e-10	2.27499e-09	501	501
ACTR6	-0.0277022	0.536161	0.595246	501	501
ACTR8	-0.143093	0.00132094	0.00229228	501	501
ACTRT1	0.0558577	0.211989	0.262281	501	16
ACTRT2	0.0369896	0.408717	0.470001	501	4
ACVR1B	0.469407	8.09206e-29	1.04033e-27	501	501
ACVR1C	-0.125825	0.00479456	0.00777516	501	501
ACVR1	-0.471396	4.42415e-29	5.78136e-28	501	501
ACVR2A	0.094377	0.0346966	0.0498594	501	501
ACVR2B	-0.0781743	0.0804497	0.108472	501	501
ACVRL1	0.700386	4.26732e-75	1.25051e-72	501	501
ACY1	0.256975	5.35313e-09	1.55408e-08	501	501
ACY3	-0.21692	9.50158e-07	2.26616e-06	501	476
ACYP1	0.238435	6.60237e-08	1.74259e-07	501	501
ACYP2	0.419937	8.01059e-23	6.53941e-22	501	501
ADAD1	0.0500639	0.26336	0.318291	501	9
ADAD2	0.17493	8.2829e-05	0.000163743	501	381
ADAL	0.510352	1.40744e-34	2.81305e-33	501	501
ADAM10	-0.0875401	0.0501972	0.0702229	501	501
ADAM11	0.392702	6.38849e-20	4.2548e-19	501	497
ADAM12	-0.431185	4.22288e-24	3.7871e-23	501	501
ADAM15	-0.089525	0.0451924	0.0637467	501	501
ADAM17	-0.0536974	0.230227	0.282236	501	501
ADAM18	-0.0123035	0.783538	0.820385	501	5
ADAM19	-0.290124	3.57839e-11	1.24293e-10	501	501
ADAM20	0.271243	6.73631e-10	2.10961e-09	501	483
ADAM21P1	0.135369	0.00239426	0.00403471	501	379
ADAM21	0.211004	1.88975e-06	4.37212e-06	501	490
ADAM22	0.234295	1.12579e-07	2.91195e-07	501	493
ADAM23	-0.213461	1.42375e-06	3.33659e-06	501	451
ADAM28	-0.243718	3.29404e-08	8.89074e-08	501	500
ADAM29	-0.195224	1.07649e-05	2.33216e-05	501	126
ADAM2	0.0801559	0.0730471	0.0993658	501	3
ADAM30	-0.0232216	0.60408	0.659084	501	26
ADAM32	0.0245173	0.584047	0.640382	501	439
ADAM33	0.253688	8.48218e-09	2.41809e-08	501	501
ADAM3A	-0.00220572	0.960722	0.967715	501	3
ADAM6	-0.388288	1.78208e-19	1.14553e-18	501	501
ADAM7	-0.0225712	0.614251	0.668607	501	8
ADAM8	-0.493812	3.70717e-32	6.1715e-31	501	501
ADAM9	-0.128503	0.00396351	0.00649942	501	501
ADAMDEC1	-0.282628	1.17847e-10	3.92369e-10	501	465
ADAMTS10	0.19271	1.40276e-05	3.00115e-05	501	501
ADAMTS12	-0.315405	4.92385e-13	1.97301e-12	501	499
ADAMTS13	0.337408	8.35155e-15	3.81001e-14	501	501
ADAMTS14	-0.627619	3.14392e-56	2.78439e-54	501	498
ADAMTS15	0.0205036	0.647071	0.699137	501	499
ADAMTS16	0.0547518	0.221191	0.272494	501	489
ADAMTS17	-0.122041	0.00623698	0.00996906	501	501
ADAMTS18	-0.172574	0.000103499	0.000202496	501	493
ADAMTS19	0.0135904	0.761549	0.801221	501	96
ADAMTS1	0.0201817	0.652245	0.703887	501	501
ADAMTS20	-0.00029272	0.994785	0.995735	501	167
ADAMTS2	-0.112189	0.0119777	0.0184779	501	501
ADAMTS3	0.259962	3.50412e-09	1.03095e-08	501	501
ADAMTS4	0.0685493	0.125446	0.162914	501	501
ADAMTS5	0.402218	6.63412e-21	4.76218e-20	501	501
ADAMTS6	-0.0856995	0.0552441	0.0767998	501	500
ADAMTS7	0.394466	4.22063e-20	2.85003e-19	501	501
ADAMTS8	0.197858	8.1278e-06	1.78255e-05	501	500
ADAMTS9	0.226387	3.03592e-07	7.57629e-07	501	501
ADAMTSL1	-0.0969296	0.0300623	0.0436213	501	501
ADAMTSL2	0.609183	3.25062e-52	2.24136e-50	501	501
ADAMTSL3	-0.108837	0.014799	0.0225149	501	499
ADAMTSL4	-0.237312	7.63788e-08	2.00501e-07	501	501
ADAMTSL5	-0.439356	4.64183e-25	4.46633e-24	501	499
ADAP1	-0.233391	1.26333e-07	3.25166e-07	501	501
ADAP2	-0.10768	0.0159001	0.0240962	501	501
ADARB1	0.177585	6.42122e-05	0.00012856	501	501
ADARB2	0.135516	0.00236809	0.00399263	501	272
ADAR	-0.461342	8.99009e-28	1.06507e-26	501	501
ADAT1	-0.0859059	0.0546581	0.0760277	501	501
ADAT2	0.418148	1.26634e-22	1.0237e-21	501	501
ADAT3	-0.0197552	0.659126	0.710121	501	501
ADA	0.0186214	0.677558	0.726601	501	501
ADCK1	0.192672	1.40831e-05	3.01206e-05	501	501
ADCK2	-0.174769	8.41064e-05	0.000166071	501	501
ADCK4	0.215526	1.11927e-06	2.65332e-06	501	501
ADCK5	0.117258	0.00861182	0.0135263	501	501
ADCY10	0.201568	5.43655e-06	1.21125e-05	501	409
ADCY1	0.536515	1.09107e-38	2.94605e-37	501	501
ADCY2	0.050315	0.26097	0.315747	501	489
ADCY3	0.29281	2.31443e-11	8.16711e-11	501	501
ADCY4	0.602801	6.93469e-51	4.44333e-49	501	501
ADCY5	0.403975	4.33141e-21	3.15014e-20	501	490
ADCY6	0.0297793	0.506029	0.566465	501	501
ADCY7	-0.51992	4.85833e-36	1.08714e-34	501	501
ADCY8	-0.533643	3.21232e-38	8.40051e-37	501	431
ADCY9	0.368885	1.35234e-17	7.54846e-17	501	501
ADCYAP1R1	0.363338	4.4224e-17	2.36895e-16	501	389
ADCYAP1	-0.0629353	0.159558	0.202918	501	404
ADC	0.0803727	0.0722721	0.0983854	501	501
ADD1	-0.165807	0.000193141	0.000368016	501	501
ADD2	0.0821307	0.0662328	0.0908117	501	499
ADD3	0.268489	1.01475e-09	3.13212e-09	501	501
ADH1A	0.0315284	0.481362	0.542662	501	214
ADH1B	0.113267	0.0111777	0.0172933	501	485
ADH1C	0.129421	0.00371001	0.00610834	501	380
ADH4	-0.0763142	0.08794	0.11776	501	92
ADH5	0.245018	2.7691e-08	7.52898e-08	501	501
ADH6	0.00879423	0.844333	0.872713	501	178
ADH7	-0.043337	0.333022	0.392345	501	23
ADHFE1	0.400658	9.66546e-21	6.85179e-20	501	501
ADI1	0.0483036	0.280538	0.336947	501	501
ADIG	0.529694	1.39373e-37	3.47595e-36	501	458
ADIPOQ	-0.00228067	0.959389	0.966763	501	158
ADIPOR1	-0.188343	2.20355e-05	4.6226e-05	501	501
ADIPOR2	0.637825	1.43439e-58	1.52037e-56	501	501
ADK	-0.324147	1.01395e-13	4.26625e-13	501	501
ADM2	0.375477	3.20953e-18	1.88885e-17	501	501
ADM	-0.0999466	0.0252782	0.0371055	501	501
ADNP2	-0.0998519	0.0254178	0.0372866	501	501
ADNP	-0.0584948	0.191165	0.238906	501	501
ADORA1	-0.395267	3.49464e-20	2.3752e-19	501	501
ADORA2A	0.243869	3.22839e-08	8.71946e-08	501	501
ADORA2B	-0.305954	2.56683e-12	9.74827e-12	501	497
ADORA3	-0.0284923	0.524594	0.584358	501	501
ADO	0.137078	0.00210442	0.00356895	501	501
ADPGK	-0.169662	0.000135757	0.000262517	501	501
ADPRHL1	0.14109	0.00154555	0.00266214	501	501
ADPRHL2	-0.226276	3.07755e-07	7.67731e-07	501	501
ADPRH	0.246815	2.17472e-08	5.97075e-08	501	501
ADRA1A	0.23543	9.73517e-08	2.53254e-07	501	381
ADRA1B	0.0713349	0.110772	0.145527	501	501
ADRA1D	0.370006	1.06143e-17	5.98336e-17	501	488
ADRA2A	-0.197456	8.48621e-06	1.85788e-05	501	501
ADRA2B	0.594765	2.96827e-49	1.68996e-47	501	501
ADRA2C	0.137257	0.00207597	0.00352367	501	501
ADRB1	0.324503	9.49873e-14	4.00595e-13	501	501
ADRB2	-0.19463	1.14632e-05	2.47457e-05	501	501
ADRB3	-0.44501	9.72273e-26	9.86481e-25	501	390
ADRBK1	-0.133958	0.00266069	0.00445918	501	501
ADRBK2	-0.0247218	0.580914	0.637672	501	501
ADRM1	0.0473057	0.290607	0.347657	501	501
ADSL	-0.34266	3.00372e-15	1.41535e-14	501	501
ADSSL1	0.257805	4.76158e-09	1.388e-08	501	501
ADSS	-0.38638	2.76296e-19	1.7551e-18	501	501
AEBP1	-0.207502	2.81329e-06	6.43338e-06	501	501
AEBP2	-0.00872851	0.845482	0.873628	501	501
AEN	0.121379	0.00652613	0.010402	501	501
AES	0.177687	6.35845e-05	0.000127367	501	501
AFAP1L1	0.641881	1.59089e-59	1.78099e-57	501	501
AFAP1L2	0.128448	0.00397906	0.00652383	501	501
AFAP1	-0.397197	2.21135e-20	1.52953e-19	501	501
AFARP1	-0.0611372	0.171846	0.216966	501	432
AFF1	0.150738	0.000712048	0.00127645	501	501
AFF2	-0.258802	4.13376e-09	1.20924e-08	501	501
AFF3	-0.244492	2.97089e-08	8.05674e-08	501	498
AFF4	-0.122859	0.00589565	0.0094485	501	501
AFG3L1	0.426572	1.43094e-23	1.23706e-22	501	501
AFG3L2	0.2846	8.64254e-11	2.91158e-10	501	501
AFMID	-0.118815	0.00776254	0.0122658	501	501
AFM	-0.0468528	0.295256	0.352587	501	17
AFP	0.0174858	0.696214	0.742929	501	78
AFTPH	0.0589748	0.187542	0.234731	501	501
AG2	0.24441	3.00342e-08	8.13942e-08	501	501
AGAP11	0.113461	0.011039	0.017092	501	500
AGAP1	-0.0434803	0.331425	0.390694	501	501
AGAP2	0.126787	0.0044795	0.00729333	501	501
AGAP3	-0.253523	8.67873e-09	2.47059e-08	501	501
AGAP4	0.319679	2.28879e-13	9.40385e-13	501	501
AGAP5	0.192838	1.38408e-05	2.96405e-05	501	501
AGAP6	0.347304	1.19654e-15	5.80839e-15	501	501
AGAP7	0.242691	3.77575e-08	1.0151e-07	501	500
AGAP8	0.173477	9.50599e-05	0.000186737	501	501
AGA	-0.0964276	0.0309293	0.0448043	501	501
AGBL1	-0.0189595	0.672041	0.721267	501	25
AGBL2	0.249768	1.45611e-08	4.05251e-08	501	500
AGBL3	0.0762377	0.0882597	0.118148	501	499
AGBL4	0.538525	5.09298e-39	1.41941e-37	501	499
AGBL5	0.144588	0.00117329	0.00204904	501	501
AGER	-0.127705	0.00419618	0.0068595	501	501
AGFG1	-0.524606	8.98218e-37	2.13589e-35	501	501
AGFG2	0.127213	0.00434585	0.00708904	501	501
AGGF1	0.0188631	0.673612	0.722797	501	501
AGK	0.298278	9.39688e-12	3.41078e-11	501	501
AGL	0.413	4.65923e-22	3.62108e-21	501	501
AGMAT	0.303117	4.16518e-12	1.55721e-11	501	501
AGPAT1	0.244354	3.026e-08	8.19615e-08	501	501
AGPAT2	-0.0913458	0.0409769	0.0582471	501	501
AGPAT3	-0.00491146	0.912679	0.929044	501	501
AGPAT4	0.309849	1.30916e-12	5.09227e-12	501	501
AGPAT5	0.264052	1.94447e-09	5.84074e-09	501	501
AGPAT6	0.152867	0.000596335	0.00107735	501	501
AGPAT9	0.482096	1.60537e-30	2.34017e-29	501	501
AGPHD1	0.464489	3.53959e-28	4.34319e-27	501	501
AGPS	-0.120221	0.00706052	0.0112188	501	501
AGR2	-0.189032	2.05344e-05	4.31817e-05	501	498
AGR3	0.102048	0.022348	0.0330896	501	351
AGRN	-0.305599	2.72795e-12	1.03405e-11	501	501
AGRP	-0.383647	5.15427e-19	3.21468e-18	501	301
AGTPBP1	-0.166559	0.000180409	0.000345077	501	501
AGTR1	0.665465	2.23706e-65	3.65393e-63	501	489
AGTR2	-0.0106767	0.811581	0.844334	501	69
AGTRAP	-0.0959799	0.0317204	0.0458536	501	501
AGT	0.0557823	0.212607	0.262957	501	501
AGXT2L1	0.473113	2.61924e-29	3.47957e-28	501	386
AGXT2L2	0.393232	5.64127e-20	3.77227e-19	501	501
AGXT2	0.0338219	0.450032	0.51116	501	136
AGXT	-0.0780128	0.0810789	0.109247	501	63
AHCTF1	0.0950731	0.0333762	0.0480832	501	501
AHCYL1	-0.0959658	0.0317457	0.0458869	501	501
AHCYL2	0.321469	1.65455e-13	6.85735e-13	501	501
AHCY	0.190881	1.69695e-05	3.60311e-05	501	501
AHDC1	0.0318514	0.476879	0.538065	501	501
AHI1	-0.0210765	0.637905	0.690544	501	501
AHNAK2	-0.684305	1.8871e-70	4.17825e-68	501	501
AHNAK	-0.328393	4.61945e-14	1.99333e-13	501	501
AHRR	0.149069	0.000816904	0.00145486	501	501
AHR	-0.557192	3.34813e-42	1.18121e-40	501	501
AHSA1	0.0148546	0.740131	0.781921	501	501
AHSA2	0.245685	2.53212e-08	6.9139e-08	501	501
AHSG	0.176139	7.3793e-05	0.000146798	501	274
AHSP	0.101609	0.0229339	0.0338974	501	311
AICDA	-0.0671952	0.133104	0.171885	501	253
AIDA	-0.356105	2.00371e-16	1.01909e-15	501	501
AIF1L	0.171541	0.000114018	0.000222139	501	501
AIF1	-0.382247	7.07701e-19	4.36876e-18	501	501
AIFM1	0.36394	3.89368e-17	2.09985e-16	501	501
AIFM2	0.236489	8.49561e-08	2.22168e-07	501	501
AIFM3	0.0529136	0.237112	0.289962	501	501
AIG1	0.163271	0.000242531	0.00045736	501	501
AIM1L	-0.573778	3.34001e-45	1.41589e-43	501	501
AIM1	-0.203563	4.3662e-06	9.81557e-06	501	501
AIM2	-0.28896	4.31582e-11	1.4892e-10	501	479
AIMP1	0.0594481	0.18402	0.230699	501	501
AIMP2	0.197205	8.7173e-06	1.90638e-05	501	501
AIPL1	-0.0308656	0.490632	0.551615	501	82
AIP	0.0696275	0.119596	0.15606	501	501
AIRE	0.143868	0.00124237	0.00216349	501	195
AJAP1	-0.153098	0.000584889	0.00105782	501	501
AK1	0.0694696	0.120439	0.156985	501	501
AK2	0.288928	4.33817e-11	1.49588e-10	501	501
AK3L1	-0.588196	5.92044e-48	3.0173e-46	501	501
AK3	0.178009	6.16327e-05	0.000123582	501	501
AK5	-0.0446065	0.319041	0.37766	501	488
AK7	0.284997	8.11775e-11	2.74174e-10	501	501
AKAP10	0.135074	0.00244797	0.00412069	501	501
AKAP11	-0.1261	0.00470234	0.00763432	501	501
AKAP12	0.183269	3.67745e-05	7.53837e-05	501	501
AKAP13	-0.193326	1.31505e-05	2.82168e-05	501	501
AKAP14	0.0901068	0.0438077	0.0619732	501	103
AKAP1	0.191852	1.53414e-05	3.2703e-05	501	501
AKAP2	-0.0129914	0.77176	0.810053	501	498
AKAP3	0.326094	7.08123e-14	3.01576e-13	501	501
AKAP4	0.202547	4.88353e-06	1.09219e-05	501	63
AKAP5	-0.186058	2.77991e-05	5.77756e-05	501	501
AKAP6	-0.0147748	0.741478	0.783094	501	501
AKAP7	0.148128	0.000882164	0.00156577	501	501
AKAP8L	0.303825	3.69262e-12	1.38678e-11	501	501
AKAP8	0.354755	2.64545e-16	1.33695e-15	501	501
AKAP9	-0.0840298	0.0601805	0.0831174	501	501
AKD1	0.239084	6.06758e-08	1.60548e-07	501	501
AKIRIN1	0.220648	6.09979e-07	1.4789e-06	501	501
AKIRIN2	-0.363479	4.29304e-17	2.30276e-16	501	501
AKNAD1	0.0562319	0.208938	0.258824	501	171
AKNA	-0.385016	3.77455e-19	2.38024e-18	501	501
AKR1A1	-0.110713	0.0131556	0.020181	501	501
AKR1B10	-0.0821125	0.0662928	0.0908853	501	313
AKR1B15	0.063348	0.156834	0.199657	501	229
AKR1B1	-0.159883	0.000327051	0.000608567	501	501
AKR1C1	0.313349	7.08838e-13	2.80425e-12	501	501
AKR1C2	0.374129	4.31842e-18	2.51103e-17	501	498
AKR1C3	0.381369	8.62635e-19	5.28752e-18	501	501
AKR1C4	-0.0573973	0.199642	0.248346	501	12
AKR1CL1	-0.0302225	0.499717	0.560438	501	18
AKR1D1	0.0299036	0.504255	0.564764	501	284
AKR1E2	0.429136	7.27907e-24	6.39832e-23	501	497
AKR7A2	-0.0115299	0.796842	0.8313	501	501
AKR7A3	0.3016	5.38449e-12	1.99214e-11	501	499
AKR7L	0.320829	1.85841e-13	7.67516e-13	501	499
AKT1S1	0.239533	5.72193e-08	1.51745e-07	501	501
AKT1	0.160184	0.000318567	0.000593446	501	501
AKT2	0.428393	8.859e-24	7.75971e-23	501	501
AKT3	-0.380326	1.09076e-18	6.63683e-18	501	501
AKTIP	0.328833	4.25512e-14	1.8409e-13	501	501
ALAD	0.245168	2.7138e-08	7.3877e-08	501	501
ALAS1	0.190674	1.73378e-05	3.67816e-05	501	501
ALAS2	0.0960828	0.0315371	0.0456245	501	346
ALB	0.245142	2.72322e-08	7.41233e-08	501	493
ALCAM	-0.429714	6.24505e-24	5.51863e-23	501	501
ALDH16A1	-0.0133033	0.766438	0.805485	501	501
ALDH18A1	0.0187488	0.675477	0.724721	501	501
ALDH1A1	0.388595	1.66017e-19	1.07028e-18	501	501
ALDH1A2	0.105236	0.0184649	0.0277133	501	497
ALDH1A3	-0.436671	9.65479e-25	9.08696e-24	501	501
ALDH1B1	0.222564	4.84211e-07	1.18449e-06	501	501
ALDH1L1	0.379767	1.23624e-18	7.48316e-18	501	498
ALDH1L2	0.000191962	0.99658	0.997081	501	501
ALDH2	0.376184	2.74481e-18	1.62158e-17	501	501
ALDH3A1	0.199295	6.96198e-06	1.53464e-05	501	501
ALDH3A2	0.0565377	0.206469	0.256025	501	501
ALDH3B1	-0.547186	1.80084e-40	5.52933e-39	501	501
ALDH3B2	-0.494509	2.94908e-32	4.95083e-31	501	468
ALDH4A1	0.342005	3.41599e-15	1.60166e-14	501	501
ALDH5A1	0.0875831	0.050084	0.0700762	501	501
ALDH6A1	0.119899	0.00721646	0.0114502	501	501
ALDH7A1	0.13762	0.00201943	0.00343297	501	501
ALDH8A1	0.0472532	0.291143	0.348194	501	482
ALDH9A1	0.5271	3.61829e-37	8.81439e-36	501	501
ALDOA	0.123496	0.00564175	0.00906638	501	501
ALDOB	0.194872	1.11731e-05	2.41535e-05	501	422
ALDOC	-0.148381	0.000864162	0.00153587	501	501
ALG10B	0.0635531	0.155493	0.198101	501	501
ALG10	-0.169819	0.000133805	0.000258918	501	501
ALG11	-0.0738506	0.098713	0.130875	501	501
ALG12	0.299044	8.26992e-12	3.01491e-11	501	501
ALG13	0.384012	4.74415e-19	2.96539e-18	501	501
ALG14	0.537315	8.06057e-39	2.20636e-37	501	501
ALG1L2	-0.056586	0.206081	0.255559	501	128
ALG1L	0.211699	1.74491e-06	4.0516e-06	501	500
ALG1	0.425529	1.88076e-23	1.61056e-22	501	501
ALG2	0.153703	0.000555866	0.00100808	501	501
ALG3	0.0975959	0.0289437	0.0420926	501	501
ALG5	0.277349	2.67126e-10	8.60354e-10	501	501
ALG6	0.110731	0.0131403	0.0201607	501	501
ALG8	0.236824	8.13544e-08	2.13029e-07	501	501
ALG9	0.279163	2.02047e-10	6.57874e-10	501	501
ALKBH1	0.0600718	0.179452	0.225598	501	501
ALKBH2	0.228192	2.42835e-07	6.11136e-07	501	501
ALKBH3	0.0213923	0.632876	0.685995	501	501
ALKBH4	0.385544	3.34594e-19	2.11531e-18	501	501
ALKBH5	0.366379	2.31651e-17	1.26886e-16	501	501
ALKBH6	0.205278	3.6093e-06	8.17767e-06	501	501
ALKBH7	0.0980997	0.0281219	0.0409699	501	501
ALKBH8	0.00124261	0.977866	0.982006	501	501
ALK	-0.156043	0.000455775	0.00083507	501	500
ALLC	0.208727	2.44969e-06	5.62385e-06	501	98
ALMS1P	0.142145	0.00142321	0.00246033	501	465
ALMS1	-0.105343	0.0183451	0.027546	501	501
ALOX12B	0.160796	0.000301919	0.000563592	501	465
ALOX12P2	0.0232637	0.603425	0.658513	501	492
ALOX12	0.303344	4.00739e-12	1.50019e-11	501	499
ALOX15B	-0.553487	1.4875e-41	5.01546e-40	501	500
ALOX15	-0.192942	1.36903e-05	2.93278e-05	501	345
ALOX5AP	-0.588801	4.50811e-48	2.31529e-46	501	501
ALOX5	-0.69607	8.07711e-74	2.17503e-71	501	501
ALOXE3	0.0297488	0.506466	0.566823	501	493
ALPI	0.020183	0.652225	0.703887	501	42
ALPK1	-0.0218367	0.625827	0.679366	501	501
ALPK2	-0.40285	5.69176e-21	4.10941e-20	501	436
ALPK3	0.141548	0.00149131	0.00257337	501	501
ALPL	0.27054	7.48259e-10	2.33342e-09	501	501
ALPPL2	0.0531657	0.234882	0.287411	501	119
ALPP	-0.0101105	0.821401	0.852681	501	152
ALS2CL	-0.17365	9.35175e-05	0.00018387	501	501
ALS2CR11	0.140719	0.00159092	0.0027346	501	491
ALS2CR12	0.183271	3.67657e-05	7.53735e-05	501	494
ALS2CR4	-0.484909	6.5818e-31	9.86131e-30	501	501
ALS2CR8	0.087455	0.0504219	0.0705191	501	501
ALS2	0.00653313	0.884026	0.906219	501	501
ALX1	0.0336917	0.451779	0.51294	501	114
ALX3	0.0175624	0.694949	0.741818	501	499
ALX4	0.321644	1.60256e-13	6.65294e-13	501	221
AMAC1L2	0.130328	0.00347427	0.0057449	501	435
AMAC1L3	0.173589	9.40576e-05	0.000184823	501	288
AMAC1	0.0328574	0.463064	0.524587	501	140
AMACR	0.380167	1.1303e-18	6.86694e-18	501	501
AMBN	-0.040779	0.362371	0.422749	501	21
AMBP	0.240657	4.93771e-08	1.31666e-07	501	384
AMBRA1	-0.197397	8.53961e-06	1.86875e-05	501	501
AMD1	-0.154803	0.000506523	0.000923128	501	501
AMDHD1	0.182551	3.94937e-05	8.07585e-05	501	494
AMDHD2	-0.254852	7.21155e-09	2.06808e-08	501	501
AMELX	-0.0890766	0.0462847	0.0651445	501	17
AMELY	0.198709	7.4164e-06	1.63174e-05	501	115
AMFR	0.0351372	0.432597	0.493834	501	501
AMHR2	0.212172	1.65239e-06	3.84394e-06	501	364
AMH	0.115753	0.00951023	0.0148624	501	471
AMICA1	-0.477305	7.19055e-30	1.002e-28	501	501
AMIGO1	-0.0597861	0.181534	0.22797	501	501
AMIGO2	-0.267725	1.136e-09	3.48637e-09	501	501
AMIGO3	0.415198	2.67897e-22	2.12009e-21	501	501
AMMECR1L	-0.0617287	0.167728	0.212251	501	501
AMMECR1	-0.260463	3.26198e-09	9.61703e-09	501	501
AMN1	0.404091	4.21095e-21	3.06919e-20	501	501
AMN	0.175985	7.48929e-05	0.000148926	501	461
AMOTL1	-0.235757	9.33528e-08	2.43169e-07	501	501
AMOTL2	0.0450452	0.314299	0.372468	501	501
AMOT	-0.69463	2.13007e-73	5.58499e-71	501	501
AMPD1	-0.310667	1.13501e-12	4.43305e-12	501	289
AMPD2	-0.0497745	0.266134	0.321324	501	501
AMPD3	-0.118851	0.00774364	0.0122369	501	501
AMPH	-0.0299372	0.503776	0.564355	501	494
AMTN	-0.41702	1.68786e-22	1.35676e-21	501	267
AMT	0.0416122	0.352639	0.412772	501	501
AMY1A	-0.295364	1.52286e-11	5.42766e-11	501	501
AMY2A	-0.15883	0.000358499	0.00066454	501	499
AMY2B	0.096042	0.0316098	0.0457136	501	501
AMZ1	-0.0429027	0.337894	0.397521	501	488
AMZ2P1	0.421569	5.26348e-23	4.35932e-22	501	501
AMZ2	0.161251	0.000290074	0.000542446	501	501
ANAPC10	0.154248	0.000530872	0.000964592	501	501
ANAPC11	0.0923473	0.0388034	0.0553695	501	501
ANAPC13	0.485996	4.65421e-31	7.06355e-30	501	501
ANAPC16	0.271092	6.88993e-10	2.1567e-09	501	501
ANAPC1	-0.212235	1.64059e-06	3.81782e-06	501	501
ANAPC2	0.26788	1.1103e-09	3.41172e-09	501	501
ANAPC4	0.305276	2.88301e-12	1.09137e-11	501	501
ANAPC5	0.228397	2.36726e-07	5.96214e-07	501	501
ANAPC7	0.195642	1.02979e-05	2.23438e-05	501	501
ANGEL1	0.13381	0.00269001	0.00450529	501	501
ANGEL2	0.0429353	0.337526	0.397136	501	501
ANGPT1	0.305868	2.60481e-12	9.88688e-12	501	501
ANGPT2	0.475512	1.25261e-29	1.71081e-28	501	501
ANGPT4	0.333663	1.71119e-14	7.63692e-14	501	495
ANGPTL1	0.517853	1.01459e-35	2.21443e-34	501	501
ANGPTL2	-0.18638	2.69092e-05	5.60255e-05	501	501
ANGPTL3	0.0684004	0.126271	0.163895	501	280
ANGPTL4	-0.356431	1.87358e-16	9.55346e-16	501	501
ANGPTL5	0.143838	0.00124536	0.0021683	501	430
ANGPTL6	-0.231359	1.63392e-07	4.16837e-07	501	486
ANGPTL7	-0.0682894	0.126888	0.164573	501	300
ANG	-0.376575	2.5176e-18	1.49089e-17	501	501
ANK1	-0.126057	0.00471678	0.00765651	501	500
ANK2	0.29801	9.82566e-12	3.55928e-11	501	501
ANK3	0.348716	9.01708e-16	4.41591e-15	501	501
ANKAR	0.286065	6.85361e-11	2.32859e-10	501	501
ANKDD1A	0.225717	3.29649e-07	8.18862e-07	501	501
ANKFN1	0.069484	0.120362	0.156905	501	154
ANKFY1	-0.429561	6.50375e-24	5.74215e-23	501	501
ANKHD1-EIF4EBP3	0.0375976	0.401053	0.462381	501	501
ANKHD1	0.0184474	0.680404	0.72906	501	501
ANKH	-0.173631	9.36849e-05	0.000184163	501	501
ANKIB1	0.0430638	0.336081	0.395575	501	501
ANKK1	0.273991	4.45526e-10	1.41279e-09	501	495
ANKLE1	0.0630922	0.158518	0.201685	501	499
ANKLE2	-0.486988	3.38753e-31	5.18857e-30	501	501
ANKMY1	-0.044978	0.315023	0.373303	501	501
ANKMY2	0.340599	4.49704e-15	2.08838e-14	501	501
ANKRA2	0.0453877	0.31063	0.368624	501	501
ANKRD10	0.0664683	0.137361	0.176936	501	501
ANKRD11	0.281768	1.34819e-10	4.46492e-10	501	501
ANKRD12	0.302793	4.40049e-12	1.64118e-11	501	501
ANKRD13A	-0.234022	1.16573e-07	3.00939e-07	501	501
ANKRD13B	-0.275347	3.62697e-10	1.15695e-09	501	501
ANKRD13C	-0.012529	0.779671	0.816993	501	501
ANKRD13D	-0.0692369	0.12169	0.158454	501	501
ANKRD16	0.134142	0.00262439	0.00440055	501	501
ANKRD17	-0.0735089	0.100286	0.132793	501	501
ANKRD19	0.098133	0.0280683	0.0409006	501	501
ANKRD1	-0.0553235	0.216398	0.26714	501	418
ANKRD20A3	0.305896	2.59245e-12	9.8437e-12	501	499
ANKRD20A4	0.20807	2.63877e-06	6.04607e-06	501	345
ANKRD20B	0.497015	1.29006e-32	2.21612e-31	501	496
ANKRD22	-0.399646	1.23227e-20	8.65542e-20	501	493
ANKRD23	0.180383	4.89073e-05	9.91028e-05	501	501
ANKRD24	0.233703	1.21401e-07	3.12999e-07	501	501
ANKRD26P1	0.0644704	0.149602	0.191282	501	143
ANKRD26	0.0979127	0.0284245	0.0413865	501	501
ANKRD27	0.110352	0.0134584	0.0206154	501	501
ANKRD28	-0.278676	2.17808e-10	7.07459e-10	501	501
ANKRD29	0.207477	2.8212e-06	6.44925e-06	501	499
ANKRD2	-0.0811055	0.0697021	0.0951207	501	384
ANKRD30A	0.0750514	0.0933374	0.124385	501	13
ANKRD30B	-0.25453	7.54354e-09	2.15915e-08	501	424
ANKRD31	0.120959	0.00671587	0.0106916	501	392
ANKRD32	-0.238263	6.7522e-08	1.78048e-07	501	501
ANKRD33	-0.0236198	0.597891	0.653368	501	208
ANKRD34A	0.407378	1.88364e-21	1.40793e-20	501	501
ANKRD34B	-0.118367	0.00799883	0.0126162	501	261
ANKRD34C	0.0843334	0.0592568	0.0819722	501	191
ANKRD35	-0.143588	0.00127027	0.00220918	501	499
ANKRD36BP1	-0.0631716	0.157994	0.201082	501	498
ANKRD36B	-0.0543966	0.224207	0.275771	501	500
ANKRD36	0.0170287	0.703774	0.749552	501	501
ANKRD37	0.359486	9.9365e-17	5.18744e-16	501	501
ANKRD39	0.0760391	0.089094	0.119145	501	501
ANKRD40	0.164414	0.000218969	0.000414881	501	501
ANKRD42	0.30933	1.43271e-12	5.55981e-12	501	501
ANKRD43	-0.121267	0.00657612	0.0104775	501	501
ANKRD44	-0.148071	0.000886249	0.00157232	501	501
ANKRD45	0.0700703	0.117257	0.153298	501	498
ANKRD46	0.631589	3.95709e-57	3.82781e-55	501	501
ANKRD49	0.38504	3.75341e-19	2.36765e-18	501	501
ANKRD50	0.0160758	0.719633	0.76387	501	501
ANKRD52	0.0493263	0.270468	0.325992	501	501
ANKRD53	0.19217	1.48414e-05	3.16814e-05	501	501
ANKRD54	0.334914	1.34825e-14	6.07156e-14	501	501
ANKRD55	-0.167107	0.000171644	0.00032888	501	471
ANKRD56	-0.495499	2.12935e-32	3.60505e-31	501	501
ANKRD57	-0.0153166	0.732353	0.775266	501	501
ANKRD58	-0.312778	7.83825e-13	3.09722e-12	501	500
ANKRD5	0.218577	7.81034e-07	1.87876e-06	501	501
ANKRD6	0.0173959	0.697698	0.744314	501	501
ANKRD7	0.178887	5.66013e-05	0.000114009	501	486
ANKRD9	0.245468	2.60699e-08	7.11009e-08	501	501
ANKS1A	0.210108	2.09375e-06	4.82783e-06	501	501
ANKS1B	0.300525	6.45227e-12	2.37354e-11	501	501
ANKS3	0.413591	4.01621e-22	3.1397e-21	501	501
ANKS4B	-0.00617366	0.890366	0.911358	501	89
ANKS6	-0.210047	2.10836e-06	4.8604e-06	501	501
ANKZF1	-0.0192774	0.66687	0.71672	501	501
ANLN	-0.363868	3.95325e-17	2.13025e-16	501	500
ANO10	0.137451	0.00204567	0.00347519	501	501
ANO1	0.168025	0.00015783	0.000303345	501	501
ANO2	0.567219	5.38175e-44	2.12782e-42	501	500
ANO3	0.533437	3.46949e-38	9.03746e-37	501	498
ANO4	0.125698	0.00483756	0.00783979	501	418
ANO5	0.129848	0.00359731	0.0059331	501	501
ANO6	-0.0844575	0.0588826	0.0815112	501	501
ANO7	0.00760278	0.865206	0.890454	501	501
ANO8	-0.029918	0.504049	0.564629	501	501
ANO9	-0.0895373	0.0451629	0.0637095	501	501
ANP32A	0.173303	9.66362e-05	0.000189684	501	501
ANP32B	-0.0715668	0.109614	0.144119	501	501
ANP32C	0.00782919	0.861232	0.886913	501	474
ANP32D	0.0628637	0.160034	0.203471	501	196
ANP32E	-0.0671632	0.133289	0.172103	501	501
ANPEP	-0.36304	4.71031e-17	2.51777e-16	501	501
ANTXR1	0.178011	6.16207e-05	0.00012357	501	501
ANTXR2	-0.095006	0.0335015	0.0482428	501	501
ANTXRL	0.224591	3.78408e-07	9.34623e-07	501	187
ANUBL1	0.220619	6.12053e-07	1.48374e-06	501	501
ANXA10	0.0402124	0.369084	0.429775	501	31
ANXA11	-0.42569	1.80336e-23	1.54695e-22	501	501
ANXA13	-0.167157	0.000170862	0.000327444	501	134
ANXA1	-0.451556	1.53335e-26	1.65341e-25	501	501
ANXA2P1	-0.582923	6.23162e-47	2.94958e-45	501	501
ANXA2P2	-0.634788	7.28417e-58	7.36811e-56	501	501
ANXA2P3	-0.401915	7.13796e-21	5.1128e-20	501	489
ANXA2	-0.627338	3.63568e-56	3.20567e-54	501	501
ANXA3	-0.556156	5.09056e-42	1.77032e-40	501	501
ANXA4	-0.572743	5.20007e-45	2.16782e-43	501	501
ANXA5	-0.190545	1.75711e-05	3.72488e-05	501	501
ANXA6	0.340338	4.73248e-15	2.19567e-14	501	501
ANXA7	-0.211495	1.78642e-06	4.14557e-06	501	501
ANXA8L1	-0.0363995	0.416238	0.47754	501	21
ANXA8L2	-0.255148	6.91946e-09	1.98766e-08	501	441
ANXA8	-0.252722	9.69885e-09	2.74686e-08	501	456
ANXA9	0.0492652	0.271063	0.32659	501	501
AOAH	-0.189396	1.97813e-05	4.16639e-05	501	501
AOC2	0.636018	3.78105e-58	3.92422e-56	501	499
AOC3	0.549522	7.18716e-41	2.28784e-39	501	501
AOX1	0.263958	1.97116e-09	5.91734e-09	501	498
AP1AR	-0.0471122	0.292587	0.349774	501	501
AP1B1	-0.145212	0.00111627	0.00195517	501	501
AP1G1	-0.00072905	0.987013	0.989645	501	501
AP1G2	0.137318	0.0020664	0.00350833	501	501
AP1M1	-0.0720975	0.106999	0.14098	501	501
AP1M2	-0.0667179	0.135888	0.175219	501	501
AP1S1	-0.2335	1.2458e-07	3.20861e-07	501	501
AP1S2	-0.131854	0.00310809	0.00517116	501	501
AP1S3	-0.0625193	0.162341	0.206141	501	501
AP2A1	-0.396458	2.63573e-20	1.81048e-19	501	501
AP2A2	-0.10531	0.0183827	0.0276004	501	501
AP2B1	-0.249973	1.41595e-08	3.94789e-08	501	501
AP2M1	-0.236553	8.42594e-08	2.20433e-07	501	501
AP2S1	0.0811447	0.0695669	0.0949428	501	501
AP3B1	0.185838	2.84232e-05	5.90112e-05	501	501
AP3B2	0.0168627	0.706529	0.752204	501	501
AP3D1	-0.0459704	0.304454	0.362352	501	501
AP3M1	-0.0578437	0.196162	0.244399	501	501
AP3M2	0.435428	1.35185e-24	1.26056e-23	501	501
AP3S1	-0.434843	1.58351e-24	1.46561e-23	501	501
AP3S2	0.322529	1.36383e-13	5.69032e-13	501	501
AP4B1	0.382688	6.4049e-19	3.96737e-18	501	501
AP4E1	-0.240435	5.08438e-08	1.35414e-07	501	501
AP4M1	-0.162216	0.000266365	0.00049975	501	501
AP4S1	0.498016	9.25255e-33	1.60187e-31	501	501
APAF1	-0.151332	0.000677799	0.00121779	501	501
APBA1	0.217137	9.2622e-07	2.21278e-06	501	501
APBA2	0.2775	2.61021e-10	8.41644e-10	501	500
APBA3	-0.0492725	0.270991	0.326524	501	501
APBB1IP	-0.303741	3.74595e-12	1.40575e-11	501	501
APBB1	-0.0719417	0.107762	0.141872	501	501
APBB2	0.231988	1.50921e-07	3.86058e-07	501	501
APBB3	0.0842786	0.0594227	0.0821789	501	501
APC2	0.204455	3.95519e-06	8.92279e-06	501	500
APCDD1L	-0.485912	4.78108e-31	7.25058e-30	501	430
APCDD1	-0.0206497	0.644728	0.696832	501	501
APCS	-0.1231	0.00579855	0.00930335	501	25
APC	0.178951	5.6248e-05	0.000113367	501	501
APEH	-0.0482437	0.281136	0.337645	501	501
APEX1	-0.322309	1.41966e-13	5.91215e-13	501	501
APEX2	-0.359289	1.03523e-16	5.39323e-16	501	501
APH1A	-0.420412	7.09117e-23	5.82224e-22	501	501
APH1B	0.159124	0.000349452	0.000648493	501	501
API5	-0.366924	2.06126e-17	1.1356e-16	501	501
APIP	0.199461	6.83757e-06	1.50972e-05	501	501
APITD1	0.521966	2.33207e-36	5.3724e-35	501	501
APLF	-0.11996	0.00718636	0.011406	501	501
APLNR	0.215906	1.07054e-06	2.54173e-06	501	501
APLN	0.316026	4.40884e-13	1.77451e-12	501	501
APLP1	0.233565	1.23565e-07	3.18371e-07	501	501
APLP2	-0.123188	0.00576305	0.00924863	501	501
APOA1BP	0.0817163	0.0676177	0.0925552	501	501
APOA1	0.457013	3.1886e-27	3.62253e-26	501	498
APOA2	0.206876	3.0184e-06	6.8803e-06	501	222
APOA4	0.43146	3.92434e-24	3.52889e-23	501	190
APOA5	0.405781	2.7876e-21	2.06346e-20	501	226
APOB48R	-0.46891	9.40337e-29	1.20425e-27	501	501
APOBEC1	-0.102192	0.0221584	0.0328363	501	6
APOBEC2	0.0788893	0.0777116	0.105123	501	498
APOBEC3A	-0.345277	1.7915e-15	8.58155e-15	501	496
APOBEC3B	-0.306935	2.16848e-12	8.28754e-12	501	498
APOBEC3C	-0.373148	5.35428e-18	3.09081e-17	501	501
APOBEC3D	-0.288293	4.80352e-11	1.64977e-10	501	501
APOBEC3F	-0.384199	4.54672e-19	2.84645e-18	501	501
APOBEC3G	-0.318538	2.81144e-13	1.14732e-12	501	501
APOBEC3H	-0.408504	1.42679e-21	1.07655e-20	501	500
APOBEC4	0.10493	0.0188103	0.0281871	501	110
APOB	-0.220467	6.23323e-07	1.51033e-06	501	375
APOC1P1	0.189667	1.92373e-05	4.05825e-05	501	316
APOC1	-0.049903	0.264899	0.320015	501	501
APOC2	-0.327662	5.29428e-14	2.27516e-13	501	493
APOC3	0.0830841	0.0631345	0.0868961	501	67
APOC4	0.0659834	0.140259	0.180388	501	330
APOD	-0.217197	9.19688e-07	2.1977e-06	501	501
APOE	0.100683	0.0242159	0.0356389	501	501
APOF	0.193689	1.26586e-05	2.72054e-05	501	187
APOH	-0.0215681	0.630083	0.683487	501	90
APOL1	-0.476932	8.07387e-30	1.11805e-28	501	501
APOL2	-0.493865	3.64368e-32	6.07087e-31	501	501
APOL3	-0.00874238	0.84524	0.873468	501	501
APOL4	-0.373315	5.16212e-18	2.98507e-17	501	501
APOL5	0.435597	1.29149e-24	1.2071e-23	501	368
APOL6	-0.441694	2.44057e-25	2.41237e-24	501	501
APOLD1	0.601063	1.57658e-50	9.94192e-49	501	501
APOM	0.520027	4.67486e-36	1.04905e-34	501	501
APOOL	-0.0674286	0.131759	0.170314	501	501
APOO	0.394809	3.89356e-20	2.63543e-19	501	501
APPBP2	0.221131	5.7555e-07	1.39883e-06	501	501
APPL1	-0.0510766	0.253813	0.308004	501	501
APPL2	0.0863879	0.0533093	0.074276	501	501
APP	0.237276	7.67348e-08	2.01329e-07	501	501
APRT	0.0823335	0.0655634	0.0899719	501	501
APTX	0.130706	0.00338018	0.00559628	501	501
AQP10	0.0591505	0.186229	0.233175	501	123
AQP11	0.101608	0.0229361	0.0338974	501	501
AQP12A	0.12887	0.00386024	0.00634051	501	33
AQP12B	0.206313	3.2152e-06	7.31134e-06	501	119
AQP1	0.368933	1.33847e-17	7.47524e-17	501	501
AQP2	0.127521	0.00425174	0.00694178	501	385
AQP3	-0.424959	2.18291e-23	1.85972e-22	501	501
AQP4	0.371096	8.37795e-18	4.76049e-17	501	499
AQP5	-0.0191382	0.669132	0.718609	501	500
AQP6	0.275993	3.28695e-10	1.05152e-09	501	486
AQP7P1	0.104072	0.0198082	0.029578	501	389
AQP7P3	-0.00700799	0.875662	0.899125	501	210
AQP7	0.668835	2.94708e-66	5.10665e-64	501	495
AQP8	-0.175898	7.55178e-05	0.000150079	501	419
AQP9	-0.581116	1.3825e-46	6.39188e-45	501	499
AQPEP	-0.201065	5.74383e-06	1.27686e-05	501	466
AQR	-0.0356802	0.425515	0.486725	501	501
ARAF	-0.138537	0.0018827	0.00320928	501	501
ARAP1	-0.516887	1.42879e-35	3.06146e-34	501	501
ARAP2	-0.123714	0.00555715	0.00893909	501	501
ARAP3	0.609355	2.98999e-52	2.0688e-50	501	501
ARCN1	-0.217243	9.14724e-07	2.18715e-06	501	501
ARC	0.312781	7.83388e-13	3.09611e-12	501	501
AREG	-0.363668	4.12444e-17	2.21769e-16	501	498
ARF1	0.193158	1.33843e-05	2.86938e-05	501	501
ARF3	0.102911	0.0212328	0.0315516	501	501
ARF4	0.00547518	0.902704	0.92096	501	501
ARF5	-0.00677282	0.879803	0.9024	501	501
ARF6	-0.66565	2.00269e-65	3.29815e-63	501	501
ARFGAP1	-0.0810225	0.0699895	0.0954608	501	501
ARFGAP2	-0.0370036	0.408539	0.469897	501	501
ARFGAP3	0.101985	0.0224317	0.0331994	501	501
ARFGEF1	-0.362129	5.70927e-17	3.03545e-16	501	501
ARFGEF2	-0.123266	0.00573205	0.00920259	501	501
ARFIP1	-0.0183888	0.681364	0.729936	501	501
ARFIP2	0.229569	2.04548e-07	5.17569e-07	501	501
ARFRP1	0.00204747	0.963538	0.970159	501	501
ARG1	0.16373	0.000232785	0.000439896	501	303
ARG2	0.20935	2.28249e-06	5.24821e-06	501	501
ARGFXP2	0.126024	0.00472763	0.00767235	501	331
ARGFX	0.0666352	0.136375	0.175768	501	59
ARGLU1	0.248348	1.76692e-08	4.88679e-08	501	501
ARHGAP10	-0.367232	1.92964e-17	1.06574e-16	501	501
ARHGAP11A	-0.0796424	0.0749099	0.101705	501	501
ARHGAP11B	-0.0933364	0.0367532	0.0526477	501	484
ARHGAP12	-0.0904863	0.0429235	0.0608174	501	501
ARHGAP15	-0.0642106	0.151253	0.193219	501	501
ARHGAP17	-0.0325411	0.467384	0.528699	501	501
ARHGAP18	-0.334172	1.55313e-14	6.96586e-14	501	501
ARHGAP19	-0.132952	0.0028666	0.00478695	501	501
ARHGAP1	-0.369123	1.28471e-17	7.18507e-17	501	501
ARHGAP20	-0.0447715	0.317253	0.375767	501	501
ARHGAP21	0.115848	0.00945086	0.0147766	501	501
ARHGAP22	0.403579	4.76877e-21	3.46436e-20	501	501
ARHGAP23	-0.306745	2.24029e-12	8.54723e-12	501	501
ARHGAP24	0.532111	5.68883e-38	1.45709e-36	501	501
ARHGAP25	0.0348657	0.436164	0.497315	501	501
ARHGAP26	0.289787	3.77863e-11	1.30997e-10	501	501
ARHGAP27	-0.0537431	0.22983	0.281835	501	501
ARHGAP28	0.257826	4.74703e-09	1.38397e-08	501	501
ARHGAP29	-0.00852603	0.849023	0.876375	501	501
ARHGAP30	-0.411368	7.00849e-22	5.39429e-21	501	501
ARHGAP31	0.425024	2.14627e-23	1.83159e-22	501	501
ARHGAP32	-0.396201	2.80117e-20	1.91949e-19	501	501
ARHGAP33	0.40557	2.9354e-21	2.16965e-20	501	501
ARHGAP36	-0.258966	4.03836e-09	1.18238e-08	501	483
ARHGAP39	0.410613	8.45876e-22	6.46558e-21	501	501
ARHGAP42	-0.0320137	0.474636	0.535807	501	501
ARHGAP4	-0.160345	0.000314095	0.000585444	501	501
ARHGAP5	0.0885153	0.0476833	0.0669617	501	501
ARHGAP6	0.141303	0.00152017	0.00262059	501	501
ARHGAP8	-0.127628	0.00421952	0.00689482	501	501
ARHGAP9	-0.370656	9.21931e-18	5.21764e-17	501	501
ARHGDIA	-0.143942	0.00123505	0.00215167	501	501
ARHGDIB	0.0352821	0.430701	0.492036	501	501
ARHGDIG	-0.249695	1.47077e-08	4.09215e-08	501	363
ARHGEF10L	0.156383	0.000442721	0.000812347	501	501
ARHGEF10	0.448559	3.59017e-26	3.77726e-25	501	501
ARHGEF11	0.247075	2.09981e-08	5.77304e-08	501	501
ARHGEF12	-0.0878581	0.0493657	0.0691585	501	501
ARHGEF15	0.702951	7.24995e-76	2.33016e-73	501	501
ARHGEF16	-0.162363	0.000262917	0.00049384	501	501
ARHGEF17	0.309225	1.45905e-12	5.66091e-12	501	501
ARHGEF18	-0.398376	1.66985e-20	1.16428e-19	501	501
ARHGEF19	0.164576	0.00021579	0.000409178	501	501
ARHGEF1	-0.00100539	0.982091	0.985355	501	501
ARHGEF2	-0.231054	1.69788e-07	4.32599e-07	501	501
ARHGEF33	0.464064	4.0174e-28	4.89931e-27	501	501
ARHGEF35	0.0978992	0.0284466	0.0414156	501	501
ARHGEF37	0.176202	7.33538e-05	0.000145997	501	501
ARHGEF38	-0.601071	1.57096e-50	9.93795e-49	501	448
ARHGEF3	0.176923	6.84448e-05	0.000136691	501	501
ARHGEF4	0.343693	2.45071e-15	1.16192e-14	501	501
ARHGEF5	0.124917	0.00510995	0.00825169	501	501
ARHGEF6	0.078602	0.0788026	0.106475	501	501
ARHGEF7	0.462825	5.80107e-28	6.97634e-27	501	501
ARHGEF9	0.517475	1.16003e-35	2.51261e-34	501	501
ARID1A	0.122909	0.0058755	0.00941848	501	501
ARID1B	0.161595	0.000281409	0.000526935	501	501
ARID2	0.200697	5.9788e-06	1.32657e-05	501	501
ARID3A	-0.219405	7.07721e-07	1.70777e-06	501	501
ARID3B	0.246253	2.34576e-08	6.42088e-08	501	501
ARID3C	-0.0699931	0.117662	0.153757	501	205
ARID4A	0.0042186	0.924959	0.938953	501	501
ARID4B	-0.0169376	0.705286	0.750961	501	501
ARID5A	-0.0134355	0.764185	0.803584	501	501
ARID5B	-0.175462	7.87295e-05	0.000156042	501	501
ARIH1	-0.231148	1.67788e-07	4.27669e-07	501	501
ARIH2	0.497625	1.05358e-32	1.82024e-31	501	501
ARL10	-0.274116	4.37211e-10	1.38731e-09	501	501
ARL11	-0.213127	1.47985e-06	3.46115e-06	501	501
ARL13A	0.136341	0.0022252	0.00376254	501	291
ARL13B	-0.310952	1.07995e-12	4.22545e-12	501	501
ARL14	-0.326086	7.09208e-14	3.01974e-13	501	472
ARL15	0.211988	1.68783e-06	3.92546e-06	501	501
ARL16	0.314669	5.61133e-13	2.23634e-12	501	501
ARL17A	0.316954	3.73565e-13	1.51179e-12	501	501
ARL17B	0.236638	8.33389e-08	2.18111e-07	501	481
ARL1	0.117797	0.00830842	0.0130724	501	501
ARL2BP	0.20334	4.47471e-06	1.00482e-05	501	501
ARL2	0.0754068	0.0917922	0.122482	501	501
ARL3	0.0947038	0.0340712	0.0490206	501	501
ARL4A	0.38404	4.71391e-19	2.94926e-18	501	501
ARL4C	-0.488518	2.07219e-31	3.24627e-30	501	501
ARL4D	0.265926	1.47955e-09	4.49366e-09	501	501
ARL5A	0.218614	7.77552e-07	1.87106e-06	501	501
ARL5B	-0.161204	0.00029128	0.000544497	501	501
ARL5C	0.21128	1.83099e-06	4.24454e-06	501	148
ARL6IP1	-0.138423	0.0018993	0.0032362	501	501
ARL6IP4	0.167853	0.000160331	0.000307914	501	501
ARL6IP5	-0.455073	5.5904e-27	6.19577e-26	501	501
ARL6IP6	-0.416072	2.14713e-22	1.7128e-21	501	501
ARL6	0.381688	8.02914e-19	4.93817e-18	501	501
ARL8A	-0.206074	3.30235e-06	7.50095e-06	501	501
ARL8B	-0.440328	3.55604e-25	3.45833e-24	501	501
ARL9	-0.172889	0.000100473	0.000196788	501	493
ARMC10	-0.249149	1.58444e-08	4.39799e-08	501	501
ARMC1	-0.133702	0.00271174	0.004539	501	501
ARMC2	0.361986	5.88336e-17	3.12467e-16	501	501
ARMC3	0.228123	2.44924e-07	6.16005e-07	501	252
ARMC4	-0.171998	0.000109237	0.000213178	501	499
ARMC5	0.334613	1.42786e-14	6.41844e-14	501	501
ARMC6	0.379099	1.4357e-18	8.65633e-18	501	501
ARMC7	0.252417	1.0116e-08	2.85971e-08	501	501
ARMC8	0.306184	2.46747e-12	9.38523e-12	501	501
ARMC9	-0.362643	5.12206e-17	2.73126e-16	501	501
ARMCX1	0.305743	2.66127e-12	1.00935e-11	501	501
ARMCX2	0.159132	0.000349192	0.000648073	501	501
ARMCX3	-0.0840824	0.0600196	0.0829296	501	501
ARMCX5	0.249817	1.44642e-08	4.02834e-08	501	501
ARMCX6	0.0556174	0.213964	0.264463	501	501
ARMS2	0.300904	6.05457e-12	2.23301e-11	501	219
ARNT2	-0.0465167	0.298736	0.35642	501	501
ARNTL2	-0.596719	1.20204e-49	7.04499e-48	501	499
ARNTL	-0.458688	1.95757e-27	2.26662e-26	501	501
ARNT	-0.116401	0.00911353	0.0142738	501	501
ARPC1A	-0.0244849	0.584545	0.640857	501	501
ARPC1B	-0.423151	3.49505e-23	2.92876e-22	501	501
ARPC2	-0.447008	5.55589e-26	5.75918e-25	501	501
ARPC3	-0.224802	3.68805e-07	9.12149e-07	501	501
ARPC4	-0.0965645	0.0306907	0.0444684	501	501
ARPC5L	-0.323822	1.0764e-13	4.52331e-13	501	501
ARPC5	-0.151646	0.000660352	0.00118794	501	501
ARPM1	-0.24746	1.9932e-08	5.49206e-08	501	501
ARPP19	-0.166674	0.00017853	0.000341548	501	501
ARPP21	0.114715	0.0101775	0.0158295	501	163
ARR3	0.0691394	0.122217	0.159064	501	162
ARRB1	-0.00578792	0.897177	0.916541	501	501
ARRB2	-0.306772	2.22996e-12	8.51252e-12	501	501
ARRDC1	-0.306457	2.35417e-12	8.97141e-12	501	501
ARRDC2	-0.299952	7.10436e-12	2.60524e-11	501	501
ARRDC3	-0.115686	0.00955161	0.01492	501	501
ARRDC4	0.365393	2.85889e-17	1.55611e-16	501	501
ARRDC5	-0.154374	0.00052524	0.000955023	501	427
ARSA	-0.252033	1.06677e-08	3.01013e-08	501	501
ARSB	-0.238044	6.94686e-08	1.82988e-07	501	501
ARSD	-0.224677	3.7445e-07	9.25307e-07	501	501
ARSE	-0.26469	1.77208e-09	5.34226e-09	501	493
ARSF	0.271711	6.28005e-10	1.97106e-09	501	248
ARSG	0.455749	4.59933e-27	5.14315e-26	501	501
ARSH	-0.152864	0.000596469	0.0010774	501	322
ARSI	-0.599756	2.91465e-50	1.78708e-48	501	480
ARSJ	-0.521339	2.92124e-36	6.67564e-35	501	501
ARSK	0.277968	2.42909e-10	7.86425e-10	501	501
ART1	0.226842	2.8702e-07	7.17711e-07	501	345
ART3	0.0691073	0.122391	0.159259	501	329
ART4	0.129105	0.00379555	0.00624145	501	475
ART5	0.235241	9.97403e-08	2.59197e-07	501	494
ARTN	0.174511	8.61895e-05	0.000169982	501	501
ARV1	0.317491	3.39317e-13	1.37626e-12	501	501
ARVCF	0.211114	1.86615e-06	4.32102e-06	501	501
ARX	-0.0478491	0.285095	0.341843	501	467
AR	0.365223	2.9645e-17	1.61271e-16	501	494
AS3MT	0.273876	4.53364e-10	1.43673e-09	501	501
ASAH1	0.0442315	0.32313	0.382001	501	501
ASAH2B	-0.0154186	0.730641	0.773864	501	461
ASAH2	-0.119291	0.00751821	0.0119014	501	492
ASAM	-0.132692	0.00292226	0.00487499	501	496
ASAP1IT1	0.0116777	0.794294	0.829076	501	48
ASAP1	0.00130216	0.976806	0.981287	501	501
ASAP2	-0.444029	1.27793e-25	1.28678e-24	501	501
ASAP3	0.055066	0.218547	0.269642	501	501
ASB10	-0.0320241	0.474492	0.53569	501	20
ASB11	0.0320678	0.473889	0.535116	501	35
ASB12	0.0844629	0.0588663	0.0814942	501	484
ASB13	-0.157793	0.000392157	0.000723901	501	501
ASB14	0.201488	5.48465e-06	1.22101e-05	501	501
ASB15	0.041881	0.349535	0.409668	501	44
ASB16	0.390837	9.87161e-20	6.46652e-19	501	501
ASB18	-0.0314751	0.482104	0.543345	501	6
ASB1	-0.0115159	0.797082	0.831464	501	501
ASB2	-0.308921	1.53821e-12	5.95413e-12	501	500
ASB3	0.114799	0.0101216	0.0157524	501	501
ASB4	-0.150247	0.000741516	0.00132677	501	411
ASB5	0.0460357	0.303767	0.361637	501	132
ASB6	0.127285	0.00432374	0.0070547	501	501
ASB7	0.12907	0.00380523	0.00625634	501	501
ASB8	0.373691	4.75451e-18	2.75576e-17	501	501
ASB9	0.30819	1.7459e-12	6.71763e-12	501	501
ASCC1	-0.0880499	0.0488696	0.0685212	501	501
ASCC2	0.0494302	0.269459	0.324933	501	501
ASCC3	-0.444222	1.21119e-25	1.22205e-24	501	501
ASCL1	-0.0231947	0.6045	0.659397	501	322
ASCL2	0.130175	0.0035131	0.005805	501	501
ASCL3	0.0683321	0.12665	0.164307	501	111
ASCL4	-0.150592	0.000720697	0.00129114	501	291
ASF1A	0.368185	1.5723e-17	8.74197e-17	501	501
ASF1B	-0.347188	1.2245e-15	5.93687e-15	501	501
ASFMR1	0.203357	4.46637e-06	1.00317e-05	501	393
ASGR1	0.215754	1.08972e-06	2.58634e-06	501	501
ASGR2	-0.291472	2.87737e-11	1.0068e-10	501	491
ASH1L	-0.0307385	0.492421	0.553334	501	501
ASH2L	-0.376507	2.55584e-18	1.51263e-17	501	501
ASIP	-0.000683301	0.987828	0.990263	501	451
ASL	0.212464	1.59772e-06	3.72372e-06	501	501
ASMTL	-0.0502716	0.261382	0.316188	501	501
ASMT	0.204579	3.90136e-06	8.80834e-06	501	409
ASNA1	0.134682	0.0025207	0.00423738	501	501
ASNSD1	-0.149624	0.000780519	0.0013923	501	501
ASNS	0.0887949	0.0469823	0.0660612	501	501
ASPA	0.636527	2.87841e-58	3.00304e-56	501	486
ASPDH	0.261583	2.77787e-09	8.24221e-09	501	309
ASPG	0.239696	5.60081e-08	1.48691e-07	501	441
ASPHD1	-0.438691	5.56901e-25	5.31483e-24	501	497
ASPHD2	-0.510808	1.20185e-34	2.41668e-33	501	501
ASPH	0.156806	0.00042693	0.000784601	501	501
ASPM	-0.279184	2.01382e-10	6.55816e-10	501	500
ASPN	-0.187263	2.46028e-05	5.13791e-05	501	501
ASPRV1	0.620814	1.02425e-54	8.29688e-53	501	501
ASPSCR1	0.234895	1.04261e-07	2.70453e-07	501	501
ASRGL1	0.467628	1.38392e-28	1.75205e-27	501	501
ASS1	-0.113477	0.0110277	0.0170785	501	501
ASTE1	0.500331	4.27421e-33	7.57759e-32	501	501
ASTL	-0.0301367	0.500936	0.561489	501	303
ASTN1	0.144357	0.00119502	0.00208541	501	488
ASTN2	0.0171106	0.702419	0.748348	501	501
ASXL1	0.149431	0.000793	0.00141343	501	501
ASXL2	-0.141163	0.0015368	0.00264821	501	501
ASXL3	0.439335	4.66887e-25	4.48802e-24	501	472
ASZ1	0.0358158	0.423757	0.48502	501	16
ATAD1	-0.165551	0.000197656	0.000376189	501	501
ATAD2B	0.0597454	0.181832	0.22833	501	501
ATAD2	-0.332713	2.04981e-14	9.09316e-14	501	501
ATAD3A	0.0403565	0.367369	0.428104	501	501
ATAD3B	0.141782	0.00146429	0.00252873	501	501
ATAD3C	0.327557	5.39782e-14	2.31766e-13	501	501
ATAD5	-0.0941388	0.0351585	0.0504793	501	500
ATCAY	-0.129598	0.00366293	0.00603532	501	172
ATE1	0.0160855	0.719471	0.763773	501	501
ATF1	-0.153564	0.000562418	0.00101959	501	501
ATF2	0.00753511	0.866395	0.891501	501	501
ATF3	-0.05717	0.201431	0.250353	501	501
ATF4	0.0311309	0.48691	0.548018	501	501
ATF5	-0.0171906	0.701094	0.747296	501	501
ATF6B	-0.0732604	0.101444	0.134165	501	501
ATF6	-0.279248	1.99416e-10	6.49627e-10	501	501
ATF7IP2	0.427698	1.06425e-23	9.28108e-23	501	501
ATF7IP	-0.135265	0.00241315	0.00406447	501	501
ATF7	0.165813	0.000193026	0.000367867	501	501
ATG10	0.426619	1.41327e-23	1.22232e-22	501	501
ATG12	-0.279341	1.96575e-10	6.40894e-10	501	501
ATG16L1	-0.317935	3.13332e-13	1.27346e-12	501	501
ATG16L2	0.314853	5.43192e-13	2.16744e-12	501	501
ATG2A	-0.42695	1.2956e-23	1.12249e-22	501	501
ATG2B	0.315388	4.93897e-13	1.97851e-12	501	501
ATG3	0.00109317	0.980528	0.984034	501	501
ATG4A	0.294197	1.84469e-11	6.5501e-11	501	501
ATG4B	0.364177	3.70225e-17	1.99877e-16	501	501
ATG4C	0.306398	2.37817e-12	9.05768e-12	501	501
ATG4D	0.359525	9.85589e-17	5.14671e-16	501	501
ATG5	-0.0800332	0.0734889	0.0999122	501	501
ATG7	-0.357656	1.4541e-16	7.47958e-16	501	501
ATG9A	-0.288528	4.62561e-11	1.5905e-10	501	501
ATG9B	-0.257353	5.07521e-09	1.47597e-08	501	499
ATHL1	0.254554	7.51831e-09	2.15224e-08	501	501
ATIC	-0.533168	3.83529e-38	9.93833e-37	501	501
ATL1	-0.0982643	0.0278577	0.0406147	501	501
ATL2	-0.230717	1.77125e-07	4.50719e-07	501	501
ATL3	-0.0975204	0.0290686	0.0422595	501	501
ATMIN	-0.0428384	0.338619	0.398233	501	501
ATM	-0.0668399	0.135172	0.174342	501	501
ATN1	0.35438	2.85654e-16	1.44071e-15	501	501
ATOH1	-0.0342093	0.444856	0.505944	501	5
ATOH7	0.378367	1.69039e-18	1.01398e-17	501	424
ATOH8	-0.139018	0.00181453	0.00309812	501	501
ATOX1	0.298894	8.47949e-12	3.08848e-11	501	501
ATP10A	-0.277832	2.48027e-10	8.01694e-10	501	501
ATP10B	-0.225949	3.20404e-07	7.97389e-07	501	494
ATP10D	0.205256	3.61822e-06	8.19694e-06	501	501
ATP11A	-0.139034	0.00181227	0.00309479	501	501
ATP11B	-0.19227	1.46873e-05	3.13659e-05	501	501
ATP11C	-0.252427	1.01021e-08	2.85621e-08	501	501
ATP12A	-0.0739868	0.098091	0.130111	501	369
ATP13A1	0.245524	2.58735e-08	7.05888e-08	501	501
ATP13A2	-0.113976	0.0106775	0.0165644	501	501
ATP13A3	0.146247	0.00102733	0.00180637	501	501
ATP13A4	-0.132808	0.00289738	0.00483552	501	501
ATP13A5	0.297074	1.14793e-11	4.12903e-11	501	489
ATP1A1	0.107274	0.0163036	0.0246777	501	501
ATP1A2	0.278361	2.28643e-10	7.41201e-10	501	501
ATP1A3	-0.00883929	0.843546	0.872035	501	475
ATP1A4	-0.198583	7.51784e-06	1.65333e-05	501	292
ATP1B1	-0.0697062	0.119178	0.155555	501	501
ATP1B2	0.64559	2.06748e-60	2.4523e-58	501	500
ATP1B3	-0.368023	1.62808e-17	9.03701e-17	501	501
ATP1B4	0.0192913	0.666644	0.716555	501	119
ATP2A1	0.248325	1.7725e-08	4.90157e-08	501	500
ATP2A2	0.161565	0.000282142	0.000528158	501	501
ATP2A3	0.275789	3.39102e-10	1.08377e-09	501	501
ATP2B1	0.00360156	0.935909	0.947993	501	501
ATP2B2	0.119564	0.00738102	0.0116963	501	434
ATP2B3	0.135315	0.00240396	0.00404968	501	133
ATP2B4	-0.414961	2.84434e-22	2.2465e-21	501	501
ATP2C1	-0.0722426	0.106293	0.140133	501	501
ATP2C2	0.324219	1.00079e-13	4.21264e-13	501	501
ATP4A	0.462878	5.71152e-28	6.87695e-27	501	464
ATP4B	0.111977	0.0121409	0.0187153	501	491
ATP5A1	0.261574	2.78174e-09	8.25246e-09	501	501
ATP5B	0.230032	1.93031e-07	4.89506e-07	501	501
ATP5C1	0.362089	5.75651e-17	3.05975e-16	501	501
ATP5D	0.254736	7.32995e-09	2.10073e-08	501	501
ATP5EP2	0.200844	5.88388e-06	1.30682e-05	501	501
ATP5E	0.234908	1.04086e-07	2.70034e-07	501	501
ATP5F1	0.271258	6.72134e-10	2.10525e-09	501	501
ATP5G1	0.278899	2.10458e-10	6.84253e-10	501	501
ATP5G2	0.203346	4.47192e-06	1.0043e-05	501	501
ATP5G3	0.213536	1.41145e-06	3.30894e-06	501	501
ATP5H	0.370853	8.832e-18	5.00555e-17	501	501
ATP5I	0.246264	2.34227e-08	6.41219e-08	501	501
ATP5J2	0.238588	6.47253e-08	1.709e-07	501	501
ATP5J	0.354744	2.65148e-16	1.33966e-15	501	501
ATP5L2	-0.00215707	0.961588	0.968489	501	345
ATP5L	0.252871	9.50057e-09	2.69415e-08	501	501
ATP5O	0.250025	1.40584e-08	3.92191e-08	501	501
ATP5SL	0.167957	0.000158815	0.00030512	501	501
ATP5S	0.0872284	0.0510238	0.071296	501	501
ATP6AP1L	0.163743	0.000232518	0.000439434	501	501
ATP6AP1	0.072718	0.104006	0.137335	501	501
ATP6AP2	0.112816	0.0115069	0.0177805	501	501
ATP6V0A1	0.0634899	0.155905	0.198564	501	501
ATP6V0A2	-0.240299	5.17586e-08	1.37795e-07	501	501
ATP6V0A4	0.0178736	0.689821	0.73745	501	309
ATP6V0B	0.31594	4.47715e-13	1.80089e-12	501	501
ATP6V0C	0.0701029	0.117086	0.153125	501	501
ATP6V0D1	0.113307	0.0111488	0.0172527	501	501
ATP6V0D2	-0.280294	1.69579e-10	5.56614e-10	501	481
ATP6V0E1	0.0653753	0.143959	0.184706	501	501
ATP6V0E2	0.390961	9.59114e-20	6.29314e-19	501	501
ATP6V1A	-0.179263	5.45672e-05	0.000110092	501	501
ATP6V1B1	0.308797	1.57181e-12	6.07595e-12	501	470
ATP6V1B2	-0.517856	1.01348e-35	2.21443e-34	501	501
ATP6V1C1	0.016084	0.719496	0.763773	501	501
ATP6V1C2	0.378713	1.56477e-18	9.40326e-18	501	501
ATP6V1D	0.0695643	0.119933	0.156438	501	501
ATP6V1E1	-0.370001	1.06253e-17	5.98786e-17	501	501
ATP6V1E2	0.217755	8.60953e-07	2.06353e-06	501	501
ATP6V1F	-0.0119866	0.788979	0.824825	501	501
ATP6V1G1	0.0799634	0.0737409	0.100234	501	501
ATP6V1G2	0.522023	2.2848e-36	5.26959e-35	501	500
ATP6V1G3	0.0236402	0.597575	0.653131	501	20
ATP6V1H	0.224504	3.82463e-07	9.43818e-07	501	501
ATP7A	0.0651836	0.14514	0.186138	501	501
ATP7B	0.300237	6.77222e-12	2.48802e-11	501	501
ATP8A1	-0.251616	1.12994e-08	3.18026e-08	501	501
ATP8A2	0.0944172	0.0346191	0.0497586	501	492
ATP8B1	0.138389	0.00190423	0.00324404	501	501
ATP8B2	-0.136599	0.00218234	0.00369289	501	501
ATP8B3	0.151258	0.000682016	0.00122481	501	501
ATP8B4	-0.306242	2.4428e-12	9.29672e-12	501	501
ATP8B5P	0.121768	0.00635492	0.0101445	501	501
ATP9A	-0.170122	0.000130103	0.000252117	501	501
ATP9B	-0.0876662	0.0498662	0.0698057	501	501
ATPAF1	0.308145	1.75972e-12	6.76558e-12	501	501
ATPAF2	0.254868	7.19543e-09	2.06396e-08	501	501
ATPBD4	0.130175	0.00351324	0.005805	501	501
ATPIF1	0.374655	3.84666e-18	2.24919e-17	501	501
ATRIP	0.32861	4.43584e-14	1.91659e-13	501	501
ATRNL1	0.254793	7.27168e-09	2.08463e-08	501	500
ATRN	0.270021	8.08381e-10	2.515e-09	501	501
ATRX	-0.0119867	0.788978	0.824825	501	501
ATR	0.188086	2.26234e-05	4.74095e-05	501	501
ATXN10	-0.0989681	0.0267523	0.0391003	501	501
ATXN1L	0.173886	9.14535e-05	0.000180007	501	501
ATXN1	-0.0871271	0.0512949	0.0716496	501	501
ATXN2L	-0.221775	5.32596e-07	1.29823e-06	501	501
ATXN2	0.0056988	0.898751	0.917773	501	501
ATXN3	-0.0397183	0.375	0.436027	501	501
ATXN7L1	0.226786	2.89023e-07	7.22358e-07	501	501
ATXN7L2	0.330858	2.91003e-14	1.27559e-13	501	501
ATXN7L3B	0.316816	3.82928e-13	1.54779e-12	501	501
ATXN7L3	-0.020099	0.653577	0.70502	501	501
ATXN7	-0.00806119	0.857163	0.883723	501	501
ATXN8OS	0.0550806	0.218426	0.269509	501	6
AUH	0.371852	7.10682e-18	4.06693e-17	501	501
AUP1	0.323331	1.17783e-13	4.93286e-13	501	501
AURKAIP1	0.0963952	0.030986	0.0448831	501	501
AURKAPS1	0.258084	4.57702e-09	1.33479e-08	501	499
AURKA	-0.0944584	0.0345399	0.0496485	501	501
AURKB	-0.363692	4.1038e-17	2.20719e-16	501	499
AURKC	-0.0486901	0.276703	0.332742	501	501
AUTS2	-0.10119	0.0235065	0.034687	501	501
AVEN	-0.158417	0.000371563	0.000687351	501	501
AVIL	0.135305	0.00240581	0.00405246	501	500
AVL9	-0.33207	2.31512e-14	1.02314e-13	501	501
AVPI1	-0.566374	7.66344e-44	3.00018e-42	501	501
AVPR1A	0.484531	7.42373e-31	1.10811e-29	501	491
AVPR1B	-0.143471	0.00128203	0.00222807	501	472
AVPR2	0.580097	2.16113e-46	9.89997e-45	501	500
AVP	0.0567692	0.204613	0.253865	501	81
AWAT1	-0.0611181	0.171981	0.217122	501	144
AWAT2	-0.139759	0.00171369	0.00293753	501	420
AXIN1	-0.369842	1.09969e-17	6.19203e-17	501	501
AXIN2	0.433693	2.15847e-24	1.97665e-23	501	501
AXL	-0.494101	3.37261e-32	5.63809e-31	501	501
AZGP1	-0.0790881	0.0769638	0.104203	501	251
AZI1	0.0446558	0.318505	0.377161	501	501
AZI2	0.273924	4.50063e-10	1.4265e-09	501	501
AZIN1	-0.0498943	0.264983	0.320097	501	501
AZU1	-0.366689	2.16751e-17	1.1915e-16	501	396
B2M	-0.486455	4.01801e-31	6.11197e-30	501	501
B3GALNT1	-0.21682	9.61473e-07	2.29178e-06	501	501
B3GALNT2	0.5358	1.42892e-38	3.82715e-37	501	501
B3GALT1	0.190658	1.73663e-05	3.68344e-05	501	329
B3GALT2	0.0777685	0.0820382	0.110398	501	490
B3GALT4	-0.239108	6.0481e-08	1.60075e-07	501	501
B3GALT5	-0.211323	1.82185e-06	4.22387e-06	501	442
B3GALT6	0.0686656	0.124804	0.162176	501	501
B3GALTL	-0.14171	0.00147258	0.00254193	501	501
B3GAT1	-0.197582	8.37199e-06	1.83409e-05	501	501
B3GAT2	0.202869	4.71308e-06	1.05549e-05	501	496
B3GAT3	0.16305	0.000247343	0.000465904	501	501
B3GNT1	0.300394	6.59582e-12	2.4241e-11	501	501
B3GNT2	-0.124552	0.00524209	0.00845412	501	501
B3GNT3	-0.659694	6.7731e-64	1.03029e-61	501	498
B3GNT4	-0.303449	3.9371e-12	1.47471e-11	501	492
B3GNT5	-0.30375	3.74018e-12	1.40385e-11	501	501
B3GNT6	-0.41751	1.49022e-22	1.20031e-21	501	315
B3GNT7	-0.24999	1.41256e-08	3.93955e-08	501	501
B3GNT8	-0.29131	2.95363e-11	1.03222e-10	501	501
B3GNT9	0.518152	9.12174e-36	2.00186e-34	501	501
B3GNTL1	0.0739852	0.0980983	0.130112	501	501
B4GALNT1	0.244069	3.14333e-08	8.50009e-08	501	500
B4GALNT2	-0.0139319	0.755745	0.796305	501	466
B4GALNT3	-0.46866	1.01419e-28	1.29467e-27	501	501
B4GALNT4	-0.0403415	0.367547	0.428236	501	433
B4GALT1	-0.456572	3.62426e-27	4.09878e-26	501	501
B4GALT2	-0.0938828	0.0356607	0.0511452	501	501
B4GALT3	-0.0773642	0.0836458	0.112448	501	501
B4GALT4	-0.0529924	0.236413	0.289161	501	501
B4GALT5	-0.617151	6.44902e-54	4.90495e-52	501	501
B4GALT6	0.158257	0.00037676	0.000696512	501	501
B4GALT7	0.183688	3.52673e-05	7.24806e-05	501	501
B9D1	0.475278	1.34662e-29	1.83418e-28	501	501
B9D2	0.334528	1.45139e-14	6.51982e-14	501	501
BAALC	-0.143979	0.0012315	0.00214604	501	499
BAAT	0.0536021	0.231057	0.283183	501	322
BACE1	-0.0692889	0.12141	0.158106	501	501
BACE2	-0.293525	2.05958e-11	7.29133e-11	501	501
BACH1	-0.474908	1.50892e-29	2.04574e-28	501	501
BACH2	-0.477107	7.64549e-30	1.06335e-28	501	501
BAD	0.296781	1.20505e-11	4.33134e-11	501	501
BAG1	-0.191219	1.63855e-05	3.48393e-05	501	501
BAG2	-0.28411	9.33729e-11	3.13398e-10	501	501
BAG3	-0.5759	1.34048e-45	5.87071e-44	501	501
BAG4	-0.188672	2.13072e-05	4.475e-05	501	501
BAG5	-0.396075	2.88663e-20	1.9767e-19	501	501
BAGE2	-0.0396719	0.375559	0.4366	501	455
BAGE	-0.0107159	0.810903	0.84376	501	32
BAHCC1	0.165563	0.000197448	0.000375829	501	501
BAHD1	-0.26754	1.16745e-09	3.57903e-09	501	501
BAI1	0.289827	3.75386e-11	1.30197e-10	501	489
BAI2	0.121103	0.00665001	0.0105895	501	501
BAI3	-0.0129399	0.772641	0.810764	501	499
BAIAP2L1	-0.133039	0.00284842	0.00475778	501	501
BAIAP2L2	0.214859	1.21e-06	2.85617e-06	501	501
BAIAP2	-0.355751	2.15548e-16	1.09433e-15	501	501
BAIAP3	-0.307733	1.88955e-12	7.25633e-12	501	501
BAK1	0.00552313	0.901857	0.920331	501	501
BAMBI	0.346804	1.32209e-15	6.39447e-15	501	501
BANF1	0.0409874	0.359921	0.420087	501	501
BANF2	0.313377	7.0529e-13	2.79077e-12	501	175
BANK1	0.218359	8.01531e-07	1.92705e-06	501	501
BANP	0.213033	1.49612e-06	3.49798e-06	501	501
BAP1	0.251419	1.16097e-08	3.26438e-08	501	501
BARD1	-0.117493	0.00847812	0.0133268	501	495
BARHL1	0.114597	0.0102557	0.0159411	501	77
BARHL2	0.122425	0.00607453	0.00972188	501	19
BARX1	0.138532	0.00188348	0.00321034	501	468
BARX2	0.108817	0.0148179	0.0225384	501	430
BASP1	-0.473422	2.38287e-29	3.17615e-28	501	501
BAT1	0.195325	1.06499e-05	2.30826e-05	501	501
BAT2L1	-0.0646817	0.14827	0.18976	501	501
BAT2L2	-0.220266	6.38555e-07	1.5463e-06	501	501
BAT2	-0.145382	0.0011012	0.00193047	501	501
BAT3	-0.344691	2.01228e-15	9.60678e-15	501	501
BAT4	-0.066892	0.134867	0.173984	501	501
BAT5	0.0192677	0.667027	0.716812	501	501
BATF2	-0.21913	7.31267e-07	1.76288e-06	501	501
BATF3	-0.525097	7.51458e-37	1.7998e-35	501	501
BATF	-0.448093	4.09425e-26	4.28949e-25	501	501
BAX	-0.306041	2.52851e-12	9.60643e-12	501	501
BAZ1A	-0.277941	2.4391e-10	7.89408e-10	501	501
BAZ1B	-0.163311	0.000241654	0.000455878	501	501
BAZ2A	-0.127898	0.0041388	0.00676903	501	501
BAZ2B	0.0743207	0.0965799	0.128355	501	501
BBC3	-0.387739	2.02205e-19	1.29561e-18	501	501
BBOX1	-0.297343	1.09783e-11	3.96312e-11	501	501
BBS10	0.203117	4.586e-06	1.02819e-05	501	501
BBS12	0.0995199	0.0259121	0.0379391	501	501
BBS1	0.167335	0.000168101	0.000322433	501	501
BBS2	-0.137565	0.00202793	0.00344683	501	501
BBS4	0.48748	2.89362e-31	4.46986e-30	501	501
BBS5	0.318326	2.92082e-13	1.19065e-12	501	501
BBS7	-0.17889	5.65826e-05	0.000113994	501	501
BBS9	-0.269713	8.46282e-10	2.62636e-09	501	501
BBX	-0.0538454	0.228943	0.280921	501	501
BCAM	0.170824	0.000121894	0.000236905	501	501
BCAN	0.333101	1.90417e-14	8.46972e-14	501	463
BCAP29	0.565261	1.21916e-43	4.67197e-42	501	501
BCAP31	0.336792	9.4049e-15	4.27295e-14	501	501
BCAR1	-0.0136061	0.761282	0.801038	501	501
BCAR3	-0.384601	4.14921e-19	2.6066e-18	501	501
BCAR4	0.120048	0.00714368	0.0113428	501	135
BCAS1	-0.256962	5.36343e-09	1.55684e-08	501	397
BCAS2	-0.026529	0.553569	0.612151	501	501
BCAS3	0.293696	2.00275e-11	7.09868e-11	501	501
BCAS4	-0.516842	1.45138e-35	3.10319e-34	501	501
BCAT1	-0.453616	8.5049e-27	9.3273e-26	501	501
BCAT2	0.358325	1.26556e-16	6.54527e-16	501	501
BCCIP	0.429818	6.0747e-24	5.37524e-23	501	501
BCDIN3D	0.498038	9.18598e-33	1.59312e-31	501	501
BCHE	0.222895	4.65187e-07	1.13977e-06	501	494
BCKDHA	0.234754	1.06169e-07	2.7515e-07	501	501
BCKDHB	0.345912	1.57913e-15	7.59165e-15	501	501
BCKDK	-0.277634	2.55684e-10	8.25372e-10	501	501
BCL10	-0.390358	1.10357e-19	7.2054e-19	501	501
BCL11A	0.115574	0.009622	0.0150241	501	500
BCL11B	-0.0133939	0.764893	0.804074	501	501
BCL2A1	-0.462639	6.12901e-28	7.34854e-27	501	501
BCL2L10	0.168399	0.000152511	0.000293519	501	494
BCL2L11	-0.113249	0.011191	0.0173125	501	501
BCL2L12	-0.255767	6.34458e-09	1.83176e-08	501	501
BCL2L13	-0.276303	3.13501e-10	1.00663e-09	501	501
BCL2L14	-0.366526	2.24445e-17	1.2321e-16	501	416
BCL2L15	0.337127	8.81717e-15	4.01508e-14	501	492
BCL2L1	-0.684099	2.15353e-70	4.71576e-68	501	501
BCL2L2	0.190628	1.74199e-05	3.6944e-05	501	501
BCL2	0.458923	1.8279e-27	2.1214e-26	501	501
BCL3	-0.477092	7.68305e-30	1.06764e-28	501	501
BCL6B	0.668175	4.39276e-66	7.41817e-64	501	501
BCL6	-0.249421	1.52682e-08	4.24278e-08	501	501
BCL7A	-0.103962	0.0199399	0.0297634	501	501
BCL7B	0.249221	1.5691e-08	4.35662e-08	501	501
BCL7C	-0.104133	0.0197361	0.0294791	501	501
BCL8	0.126728	0.00449809	0.0073212	501	461
BCL9L	-0.475364	1.31134e-29	1.7898e-28	501	501
BCL9	-0.233311	1.27618e-07	3.28347e-07	501	501
BCLAF1	0.0221741	0.620497	0.674374	501	501
BCMO1	0.0889393	0.0466237	0.0655984	501	312
BCO2	0.413534	4.07463e-22	3.18163e-21	501	501
BCORL1	0.0780751	0.0808356	0.108949	501	501
BCORL2	0.0242357	0.588375	0.644206	501	109
BCOR	0.111801	0.0122782	0.0189151	501	501
BCR	-0.22301	4.58716e-07	1.12461e-06	501	501
BCS1L	0.239243	5.94288e-08	1.57437e-07	501	501
BCYRN1	0.0460182	0.30395	0.361817	501	6
BDH1	0.514268	3.59444e-35	7.52378e-34	501	501
BDH2	0.165975	0.000190227	0.000362916	501	501
BDKRB1	0.392389	6.87314e-20	4.56994e-19	501	498
BDKRB2	0.349982	6.98835e-16	3.44014e-15	501	501
BDNFOS	0.496819	1.37672e-32	2.3589e-31	501	501
BDNF	-0.0663622	0.137991	0.177725	501	501
BDP1	-0.00630683	0.888016	0.90942	501	501
BEAN	-0.644413	3.9628e-60	4.61793e-58	501	501
BECN1	-0.32995	3.45198e-14	1.5052e-13	501	501
BEGAIN	0.648611	3.84335e-61	4.84725e-59	501	499
BEND2	0.0970791	0.0298081	0.0432903	501	89
BEND3	-0.157571	0.000399769	0.000737202	501	501
BEND4	-0.0951904	0.0331579	0.0477929	501	344
BEND5	0.408855	1.30828e-21	9.90883e-21	501	501
BEND6	-0.618224	3.77161e-54	2.92439e-52	501	501
BEND7	0.0620583	0.165466	0.209682	501	501
BEST1	-0.222049	5.15324e-07	1.25798e-06	501	501
BEST2	0.0760865	0.0888944	0.118902	501	130
BEST3	0.0101046	0.821503	0.852698	501	103
BEST4	-0.0477713	0.285879	0.342639	501	500
BET1L	0.114307	0.0104506	0.016234	501	501
BET1	0.040692	0.363397	0.423846	501	501
BET3L	0.441305	2.71715e-25	2.67514e-24	501	443
BEX1	0.436681	9.62733e-25	9.06634e-24	501	501
BEX2	0.383087	5.85154e-19	3.63818e-18	501	501
BEX4	0.264089	1.93414e-09	5.81058e-09	501	501
BEX5	0.464051	4.03283e-28	4.91512e-27	501	501
BFAR	-0.264806	1.74263e-09	5.25665e-09	501	501
BFSP1	0.599343	3.53725e-50	2.14899e-48	501	501
BFSP2	-0.043961	0.326101	0.385238	501	414
BGLAP	0.158749	0.000361019	0.000668963	501	501
BGN	-0.0211185	0.637235	0.690006	501	501
BHLHA15	-0.0352925	0.430565	0.491909	501	433
BHLHB9	0.367046	2.00826e-17	1.10732e-16	501	501
BHLHE22	-0.212928	1.51434e-06	3.53891e-06	501	472
BHLHE23	0.183296	3.66725e-05	7.52055e-05	501	61
BHLHE40	-0.512795	6.01967e-35	1.24176e-33	501	501
BHLHE41	-0.279544	1.9048e-10	6.21838e-10	501	501
BHMT2	0.272784	5.34532e-10	1.68618e-09	501	501
BHMT	0.289153	4.18457e-11	1.44541e-10	501	489
BICC1	-0.339666	5.39373e-15	2.49318e-14	501	489
BICD1	-0.223349	4.40227e-07	1.08168e-06	501	501
BICD2	-0.219026	7.40395e-07	1.78424e-06	501	501
BID	-0.48582	4.92288e-31	7.43732e-30	501	501
BIK	0.086043	0.0542716	0.0755428	501	501
BIN1	0.190818	1.70812e-05	3.62528e-05	501	501
BIN2	-0.361058	7.15043e-17	3.76949e-16	501	501
BIN3	0.0396844	0.375408	0.436451	501	501
BIRC2	-0.300906	6.05218e-12	2.23254e-11	501	501
BIRC3	-0.601534	1.26254e-50	8.0123e-49	501	501
BIRC5	-0.251816	1.09911e-08	3.09698e-08	501	497
BIRC6	0.0417274	0.351306	0.411503	501	501
BIRC7	-0.325719	7.59015e-14	3.22699e-13	501	483
BIRC8	-0.00628408	0.888418	0.909691	501	31
BIVM	0.262715	2.35999e-09	7.04216e-09	501	501
BLCAP	0.217221	9.17091e-07	2.19202e-06	501	501
BLID	0.0327139	0.465021	0.526415	501	121
BLK	-0.0279236	0.532906	0.592227	501	468
BLMH	0.491518	7.84413e-32	1.26978e-30	501	501
BLM	-0.33224	2.24167e-14	9.91778e-14	501	501
BLNK	-0.106886	0.0166965	0.0252417	501	501
BLOC1S1	0.215204	1.16227e-06	2.74934e-06	501	501
BLOC1S2	-0.173443	9.53637e-05	0.000187278	501	501
BLOC1S3	0.267687	1.14236e-09	3.50483e-09	501	501
BLVRA	-0.33229	2.22071e-14	9.82724e-14	501	501
BLVRB	0.0859911	0.0544176	0.0757248	501	501
BLZF1	0.00654232	0.883864	0.906099	501	501
BMF	0.0967896	0.030302	0.0439468	501	501
BMI1	-0.116586	0.00900281	0.0141104	501	501
BMP10	0.0877032	0.0497693	0.0696847	501	19
BMP15	0.0842742	0.059436	0.0821859	501	40
BMP1	-0.242951	3.64758e-08	9.81705e-08	501	501
BMP2K	-0.144729	0.00116012	0.00202715	501	501
BMP2	0.0433444	0.332939	0.392325	501	501
BMP3	-0.123576	0.00561051	0.00901764	501	443
BMP4	-0.095683	0.0322546	0.0465685	501	501
BMP5	0.153234	0.00057826	0.00104678	501	345
BMP6	0.166347	0.000183913	0.000351476	501	501
BMP7	0.250424	1.331e-08	3.71728e-08	501	501
BMP8A	0.50242	2.11751e-33	3.85349e-32	501	501
BMP8B	0.396636	2.5266e-20	1.73732e-19	501	501
BMPER	-0.0211895	0.636104	0.689044	501	500
BMPR1A	0.222805	4.70258e-07	1.15163e-06	501	501
BMPR1B	-0.203708	4.2967e-06	9.66916e-06	501	461
BMPR2	0.010413	0.81615	0.848158	501	501
BMS1P4	0.0475646	0.287971	0.344794	501	500
BMS1P5	0.216682	9.77258e-07	2.32746e-06	501	500
BMS1	-0.214072	1.32627e-06	3.11695e-06	501	501
BMX	0.37659	2.50902e-18	1.48624e-17	501	500
BNC1	-0.434546	1.71547e-24	1.58407e-23	501	486
BNC2	-0.0701157	0.117019	0.153047	501	501
BNIP1	0.319961	2.17504e-13	8.94757e-13	501	501
BNIP2	0.11416	0.0105508	0.0163768	501	501
BNIP3L	-0.255706	6.39947e-09	1.84601e-08	501	501
BNIP3	-0.012674	0.777188	0.814935	501	501
BNIPL	-0.15858	0.000366339	0.000678196	501	501
BOC	0.342851	2.8928e-15	1.36502e-14	501	501
BOD1L	0.0197325	0.659494	0.710326	501	501
BOD1	0.201015	5.77528e-06	1.28356e-05	501	501
BOK	-0.0400826	0.370633	0.431376	501	501
BOLA1	0.267167	1.23335e-09	3.77409e-09	501	501
BOLA2	0.0402613	0.368502	0.429198	501	501
BOLA3	0.339147	5.96542e-15	2.75232e-14	501	501
BOLL	-0.00728088	0.870862	0.895147	501	70
BOP1	0.125797	0.0048041	0.00778937	501	501
BPESC1	-0.0194906	0.66341	0.713579	501	32
BPGM	-0.475198	1.38022e-29	1.8761e-28	501	501
BPHL	-0.06628	0.138481	0.178279	501	501
BPIL1	0.240503	5.03876e-08	1.34235e-07	501	160
BPIL2	-0.159036	0.000352121	0.000653264	501	72
BPI	-0.134694	0.00251857	0.00423416	501	255
BPNT1	-0.273616	4.71527e-10	1.49334e-09	501	501
BPTF	0.043921	0.326541	0.385645	501	501
BRAF	-0.154161	0.000534801	0.000971465	501	501
BRAP	-0.0196789	0.66036	0.710912	501	501
BRCA1	0.0839414	0.0604518	0.0834747	501	501
BRCA2	-0.357253	1.58054e-16	8.11322e-16	501	499
BRCC3	-0.0462488	0.301531	0.359324	501	501
BRD1	-0.0181096	0.685941	0.733932	501	501
BRD2	0.396268	2.75702e-20	1.89119e-19	501	501
BRD3	-0.0797987	0.0743388	0.100999	501	501
BRD4	-0.0734736	0.10045	0.132984	501	501
BRD7P3	0.0788575	0.0778316	0.105249	501	313
BRD7	-0.0440657	0.324949	0.383992	501	501
BRD8	0.0597223	0.182001	0.228514	501	501
BRD9	-0.147824	0.000904235	0.00160166	501	501
BRDT	0.0175483	0.695182	0.741947	501	134
BREA2	0.250304	1.35307e-08	3.77787e-08	501	496
BRE	-0.287048	5.86129e-11	2.00202e-10	501	501
BRF1	0.381194	8.97254e-19	5.4879e-18	501	501
BRF2	0.0622405	0.164226	0.208335	501	501
BRI3BP	-0.244822	2.84264e-08	7.72261e-08	501	501
BRI3	-0.321971	1.50988e-13	6.27605e-13	501	501
BRIP1	-0.308655	1.61098e-12	6.21889e-12	501	495
BRIX1	-0.180992	4.60657e-05	9.36016e-05	501	501
BRMS1L	0.0977438	0.0287004	0.0417638	501	501
BRMS1	0.0903773	0.0431759	0.0611533	501	501
BRP44L	0.404268	4.0336e-21	2.94531e-20	501	501
BRP44	0.0965381	0.0307366	0.0445284	501	501
BRPF1	0.35126	5.39614e-16	2.67086e-15	501	501
BRPF3	-0.270927	7.06255e-10	2.209e-09	501	501
BRS3	0.151981	0.000642157	0.00115678	501	87
BRSK1	0.196723	9.17794e-06	2.00141e-05	501	501
BRSK2	0.393608	5.16467e-20	3.46753e-19	501	498
BRWD1	0.329964	3.44251e-14	1.5014e-13	501	501
BRWD3	0.0357407	0.424731	0.485939	501	501
BSCL2	0.209991	2.12177e-06	4.89019e-06	501	501
BSDC1	0.0699946	0.117654	0.153757	501	501
BSG	0.195918	1.0001e-05	2.17352e-05	501	501
BSND	0.0482165	0.281408	0.33789	501	69
BSN	-0.057575	0.19825	0.246831	501	501
BSPRY	0.139076	0.00180635	0.00308653	501	501
BST1	-0.138016	0.00195927	0.00333353	501	501
BST2	-0.0934799	0.0364636	0.0522553	501	501
BSX	0.0534204	0.232644	0.2849	501	4
BTAF1	0.024975	0.577045	0.633961	501	501
BTBD10	-0.431949	3.44395e-24	3.10532e-23	501	501
BTBD11	0.70561	1.13105e-76	4.09791e-74	501	501
BTBD12	0.190863	1.70018e-05	3.60957e-05	501	501
BTBD16	0.232686	1.38156e-07	3.54342e-07	501	280
BTBD17	0.455482	4.96797e-27	5.53917e-26	501	301
BTBD18	0.172964	9.97726e-05	0.000195493	501	471
BTBD19	0.294721	1.69284e-11	6.0238e-11	501	500
BTBD1	-0.371044	8.47328e-18	4.81046e-17	501	501
BTBD2	-0.102523	0.021728	0.0322513	501	501
BTBD3	0.458493	2.07272e-27	2.39299e-26	501	501
BTBD6	0.126274	0.00464485	0.00754405	501	501
BTBD7	0.169466	0.000138244	0.000267093	501	501
BTBD8	-0.0781696	0.0804678	0.108483	501	475
BTBD9	-0.181879	4.22095e-05	8.61086e-05	501	501
BTC	-0.158671	0.000363468	0.00067325	501	500
BTD	0.129093	0.00379884	0.00624635	501	501
BTF3L1	-0.0439584	0.32613	0.385238	501	98
BTF3L4	0.162046	0.000270414	0.000507156	501	501
BTF3	-0.192154	1.48651e-05	3.17184e-05	501	501
BTG1	-0.206764	3.05668e-06	6.96548e-06	501	501
BTG2	0.103517	0.0204784	0.0305169	501	501
BTG3	-0.546343	2.50379e-40	7.60565e-39	501	501
BTG4	0.0683758	0.126407	0.164045	501	45
BTK	-0.396205	2.79907e-20	1.91938e-19	501	501
BTLA	-0.32455	9.41669e-14	3.97388e-13	501	497
BTN1A1	-0.0666074	0.136539	0.175967	501	340
BTN2A1	0.146684	0.000991762	0.00174614	501	501
BTN2A2	-0.336051	1.08426e-14	4.91379e-14	501	501
BTN2A3	0.111525	0.0124958	0.0192266	501	500
BTN3A1	-0.408729	1.34959e-21	1.02101e-20	501	501
BTN3A2	-0.391372	8.71651e-20	5.74005e-19	501	501
BTN3A3	-0.302099	4.94889e-12	1.83746e-11	501	501
BTNL2	0.0643546	0.150337	0.192159	501	190
BTNL3	0.416044	2.16285e-22	1.72465e-21	501	249
BTNL8	0.54818	1.21937e-40	3.8386e-39	501	434
BTNL9	1	1e-125	1e-121	501	501
BTRC	0.234247	1.13273e-07	2.92799e-07	501	501
BUB1B	-0.0772911	0.0839393	0.112819	501	501
BUB1	-0.49356	4.02751e-32	6.69359e-31	501	501
BUB3	-0.158739	0.000361347	0.000669509	501	501
BUD13	0.0973934	0.0292799	0.0425635	501	501
BUD31	0.141368	0.00151246	0.0026083	501	501
BVES	0.463184	5.21615e-28	6.30717e-27	501	500
BYSL	-0.139806	0.00170755	0.00292724	501	501
BZRAP1	0.0995873	0.0258112	0.0378164	501	501
BZW1	-0.36646	2.27647e-17	1.2483e-16	501	501
BZW2	-0.0347868	0.437204	0.498293	501	501
C10orf105	0.0578579	0.196051	0.244276	501	499
C10orf107	0.3782	1.75436e-18	1.0514e-17	501	452
C10orf108	0.412487	5.29811e-22	4.10161e-21	501	430
C10orf10	-0.189986	1.86141e-05	3.93594e-05	501	501
C10orf110	0.28974	3.80707e-11	1.3189e-10	501	492
C10orf111	0.399427	1.29874e-20	9.09663e-20	501	500
C10orf113	0.213831	1.36393e-06	3.20205e-06	501	115
C10orf114	0.286472	6.42398e-11	2.18822e-10	501	501
C10orf116	-0.144743	0.00115885	0.00202511	501	501
C10orf118	-0.0997973	0.0254985	0.0373939	501	501
C10orf119	-0.365721	2.66577e-17	1.45377e-16	501	501
C10orf11	0.0368215	0.410851	0.472147	501	501
C10orf120	0.0389936	0.383783	0.444915	501	7
C10orf122	-0.0426531	0.340714	0.400343	501	25
C10orf125	-0.263517	2.1015e-09	6.29628e-09	501	501
C10orf128	-0.144778	0.00115562	0.00202001	501	494
C10orf129	0.228839	2.24043e-07	5.65413e-07	501	441
C10orf12	-0.216421	1.00769e-06	2.39763e-06	501	501
C10orf131	0.272124	5.90345e-10	1.85754e-09	501	475
C10orf137	0.115711	0.00953604	0.0148992	501	501
C10orf140	0.444625	1.08239e-25	1.09542e-24	501	501
C10orf18	0.0645961	0.148809	0.190365	501	501
C10orf25	0.133936	0.00266494	0.00446555	501	501
C10orf26	0.401064	8.76502e-21	6.22898e-20	501	501
C10orf27	0.266062	1.45046e-09	4.41139e-09	501	103
C10orf28	-0.0852417	0.056563	0.0785512	501	501
C10orf2	0.00630943	0.88797	0.90942	501	501
C10orf32	0.44864	3.50862e-26	3.69537e-25	501	501
C10orf35	0.0714988	0.109952	0.144507	501	501
C10orf40	0.0367889	0.411265	0.472514	501	8
C10orf41	0.363539	4.23819e-17	2.27579e-16	501	501
C10orf46	-0.447868	4.36221e-26	4.56064e-25	501	501
C10orf47	-0.464848	3.18098e-28	3.91764e-27	501	501
C10orf4	0.171675	0.000112596	0.000219562	501	501
C10orf50	0.0607365	0.174678	0.220179	501	190
C10orf53	-0.0224889	0.615544	0.669904	501	44
C10orf54	0.081243	0.0692283	0.0945131	501	501
C10orf55	-0.50726	4.08342e-34	7.88472e-33	501	500
C10orf57	0.26194	2.63886e-09	7.84846e-09	501	501
C10orf58	0.324525	9.45883e-14	3.99081e-13	501	501
C10orf62	0.214468	1.26655e-06	2.98221e-06	501	150
C10orf67	-0.0494522	0.269246	0.324728	501	498
C10orf68	0.355254	2.38763e-16	1.2088e-15	501	501
C10orf71	-0.0178656	0.689953	0.737551	501	44
C10orf72	0.069144	0.122192	0.159042	501	501
C10orf75	0.173057	9.89006e-05	0.000193918	501	501
C10orf76	0.331393	2.63081e-14	1.15676e-13	501	501
C10orf78	-0.166863	0.000175499	0.000335976	501	501
C10orf79	0.5073	4.02777e-34	7.79236e-33	501	500
C10orf81	-0.385239	3.58711e-19	2.2649e-18	501	433
C10orf82	0.186041	2.78464e-05	5.78679e-05	501	486
C10orf84	0.44598	7.41283e-26	7.59072e-25	501	501
C10orf88	0.142181	0.00141925	0.0024537	501	501
C10orf90	0.420685	6.61058e-23	5.43437e-22	501	360
C10orf91	-0.0569163	0.203442	0.252663	501	469
C10orf93	0.254438	7.6403e-09	2.18496e-08	501	500
C10orf95	-0.311631	9.58786e-13	3.76394e-12	501	501
C10orf96	0.0779221	0.0814338	0.109659	501	5
C10orf99	-0.0927425	0.0379729	0.0542817	501	97
C11orf10	-0.028055	0.530979	0.590331	501	501
C11orf16	0.0172929	0.699401	0.74577	501	278
C11orf17	0.0541313	0.226478	0.278307	501	501
C11orf1	0.267999	1.09099e-09	3.356e-09	501	501
C11orf20	0.513948	4.02212e-35	8.39467e-34	501	366
C11orf21	-0.148721	0.000840491	0.00149553	501	499
C11orf24	-0.357116	1.62599e-16	8.33363e-16	501	501
C11orf2	0.141856	0.00145588	0.00251485	501	501
C11orf30	0.110081	0.0136899	0.0209394	501	501
C11orf31	-0.0675226	0.13122	0.169694	501	501
C11orf34	0.138993	0.00181794	0.00310367	501	214
C11orf35	0.438717	5.52925e-25	5.27941e-24	501	501
C11orf36	0.095903	0.0318581	0.0460327	501	144
C11orf41	-0.399164	1.38321e-20	9.67809e-20	501	498
C11orf42	0.101663	0.0228611	0.0337947	501	366
C11orf45	0.0745949	0.0953526	0.126842	501	501
C11orf46	0.21931	7.15744e-07	1.72671e-06	501	501
C11orf48	0.102291	0.0220292	0.0326498	501	501
C11orf49	0.0820111	0.06663	0.0912847	501	501
C11orf51	0.42267	3.95892e-23	3.31051e-22	501	501
C11orf52	0.310014	1.2721e-12	4.95292e-12	501	501
C11orf53	-0.149867	0.000765074	0.00136658	501	103
C11orf54	0.0538787	0.228655	0.280602	501	501
C11orf57	0.288079	4.97086e-11	1.70548e-10	501	501
C11orf58	-0.0338512	0.449639	0.510742	501	501
C11orf59	0.238341	6.68361e-08	1.7631e-07	501	501
C11orf61	0.381504	8.36852e-19	5.13422e-18	501	501
C11orf63	0.212386	1.61227e-06	3.75631e-06	501	501
C11orf65	0.317105	3.63611e-13	1.4733e-12	501	500
C11orf66	0.170408	0.0001267	0.000245837	501	501
C11orf67	0.270005	8.10283e-10	2.51974e-09	501	501
C11orf68	-0.10888	0.0147598	0.0224656	501	501
C11orf70	0.00926624	0.836093	0.865408	501	500
C11orf71	0.483289	1.1011e-30	1.62651e-29	501	501
C11orf73	-0.114456	0.0103503	0.0160857	501	501
C11orf74	0.495637	2.03457e-32	3.45635e-31	501	501
C11orf75	-0.11217	0.0119924	0.0184991	501	501
C11orf80	-0.550228	5.43906e-41	1.73971e-39	501	501
C11orf82	-0.416704	1.82941e-22	1.46876e-21	501	500
C11orf83	0.251452	1.15568e-08	3.25042e-08	501	501
C11orf84	0.120517	0.00692034	0.0110022	501	501
C11orf85	0.244298	3.04865e-08	8.25527e-08	501	353
C11orf86	-0.4089	1.2937e-21	9.80212e-21	501	316
C11orf87	-0.0456521	0.307817	0.365808	501	112
C11orf88	0.268324	1.03988e-09	3.20668e-09	501	436
C11orf90	0.0708715	0.113114	0.14832	501	258
C11orf92	0.180947	4.62736e-05	9.39953e-05	501	501
C11orf93	0.24953	1.50434e-08	4.18206e-08	501	500
C11orf94	0.146923	0.00097281	0.0017155	501	54
C11orf95	0.0921034	0.0393235	0.0560755	501	501
C11orf9	-0.0734018	0.100784	0.133382	501	501
C12orf10	0.296351	1.29404e-11	4.63781e-11	501	501
C12orf11	0.203189	4.55017e-06	1.02061e-05	501	501
C12orf12	-0.0116568	0.794655	0.829366	501	9
C12orf23	0.106477	0.0171203	0.0258354	501	501
C12orf24	0.445352	8.83655e-26	8.99316e-25	501	501
C12orf26	0.183314	3.66068e-05	7.50787e-05	501	501
C12orf27	0.0636407	0.154923	0.197464	501	69
C12orf29	-0.0379804	0.396272	0.45753	501	501
C12orf32	-0.114016	0.0106498	0.0165241	501	501
C12orf34	0.193624	1.27448e-05	2.73847e-05	501	501
C12orf35	0.00701834	0.87548	0.899031	501	501
C12orf36	-0.219054	7.37955e-07	1.77879e-06	501	157
C12orf39	0.58555	1.93934e-47	9.56565e-46	501	470
C12orf40	0.0233057	0.602771	0.657943	501	36
C12orf41	0.160148	0.00031957	0.000595257	501	501
C12orf42	-0.038855	0.385477	0.446645	501	211
C12orf43	0.184342	3.3035e-05	6.81458e-05	501	501
C12orf44	-0.0646962	0.148178	0.189668	501	501
C12orf45	0.224077	4.02898e-07	9.92603e-07	501	501
C12orf47	0.3057	2.68093e-12	1.01661e-11	501	501
C12orf48	-0.259173	3.92116e-09	1.14975e-08	501	501
C12orf49	-0.370823	8.88949e-18	5.03671e-17	501	501
C12orf4	0.0358113	0.423815	0.485059	501	501
C12orf50	0.00823655	0.854091	0.880834	501	150
C12orf51	0.29237	2.48657e-11	8.75439e-11	501	501
C12orf52	0.00732747	0.870043	0.894508	501	501
C12orf53	-0.302556	4.58065e-12	1.70614e-11	501	501
C12orf54	0.13954	0.00174302	0.00298421	501	423
C12orf56	-0.17506	8.1806e-05	0.000161833	501	420
C12orf57	0.154472	0.0005209	0.000947683	501	501
C12orf59	-0.4241	2.73049e-23	2.30455e-22	501	488
C12orf5	-0.182498	3.96996e-05	8.11711e-05	501	501
C12orf60	0.31602	4.41357e-13	1.77603e-12	501	501
C12orf61	0.24641	2.29693e-08	6.29327e-08	501	501
C12orf62	0.197691	8.27512e-06	1.81366e-05	501	501
C12orf63	0.25645	5.764e-09	1.66898e-08	501	456
C12orf65	0.168418	0.000152244	0.00029309	501	501
C12orf66	-0.0191884	0.668315	0.718003	501	501
C12orf68	0.24884	1.65253e-08	4.57918e-08	501	501
C12orf69	0.0947192	0.0340419	0.0489821	501	497
C12orf70	-0.496847	1.36386e-32	2.34089e-31	501	295
C12orf71	0.141693	0.00147447	0.00254498	501	296
C12orf72	0.558448	2.01167e-42	7.31505e-41	501	501
C12orf73	0.340103	4.95386e-15	2.29678e-14	501	501
C12orf74	-0.0451283	0.313407	0.37152	501	78
C12orf75	-0.206119	3.28586e-06	7.46435e-06	501	501
C12orf76	-0.423478	3.2102e-23	2.69573e-22	501	501
C12orf77	-0.0330099	0.46099	0.522416	501	73
C13orf15	0.735149	2.74712e-86	1.56405e-83	501	501
C13orf16	0.158141	0.000380562	0.000703344	501	393
C13orf18	-0.290893	3.16043e-11	1.10217e-10	501	501
C13orf1	-0.0382714	0.39266	0.454044	501	501
C13orf23	0.146773	0.000984681	0.00173459	501	501
C13orf26	0.031038	0.488212	0.549305	501	65
C13orf27	-0.189333	1.99095e-05	4.19206e-05	501	501
C13orf29	0.0783696	0.0796941	0.107534	501	501
C13orf30	0.00332204	0.940874	0.951764	501	182
C13orf31	-0.286902	5.99867e-11	2.04719e-10	501	501
C13orf33	-0.389304	1.40917e-19	9.12889e-19	501	501
C13orf34	0.171544	0.000113977	0.000222081	501	500
C13orf35	0.0520788	0.244602	0.298134	501	157
C13orf36	0.199488	6.8179e-06	1.50571e-05	501	469
C13orf37	-0.200274	6.26038e-06	1.38689e-05	501	501
C13orf38	-0.10236	0.0219382	0.0325246	501	479
C13orf39	-0.0149888	0.737869	0.779862	501	47
C14orf101	-0.00969504	0.828623	0.85897	501	501
C14orf102	0.187116	2.4972e-05	5.21175e-05	501	501
C14orf104	0.102027	0.0223759	0.0331242	501	501
C14orf105	0.0596799	0.182312	0.228875	501	98
C14orf106	-0.184278	3.32481e-05	6.85569e-05	501	501
C14orf109	0.222009	5.17783e-07	1.26382e-06	501	501
C14orf115	0.0354905	0.427982	0.489322	501	176
C14orf118	-0.0675368	0.131139	0.169601	501	501
C14orf119	-0.420656	6.65996e-23	5.47045e-22	501	501
C14orf126	0.440943	3.00181e-25	2.94521e-24	501	501
C14orf128	0.326957	6.03499e-14	2.58123e-13	501	501
C14orf129	-0.366468	2.27281e-17	1.24664e-16	501	501
C14orf132	0.0988494	0.026936	0.0393515	501	501
C14orf135	0.0930364	0.0373651	0.0534513	501	501
C14orf138	0.0833307	0.0623529	0.0858915	501	501
C14orf139	0.368078	1.60888e-17	8.94035e-17	501	501
C14orf142	0.254729	7.33673e-09	2.10207e-08	501	501
C14orf143	-0.11697	0.00877749	0.0137745	501	501
C14orf145	-0.0173759	0.698029	0.744627	501	501
C14orf147	-0.375581	3.13668e-18	1.84651e-17	501	501
C14orf148	0.430681	4.82953e-24	4.31174e-23	501	499
C14orf149	0.348478	9.45684e-16	4.62445e-15	501	501
C14orf153	0.215474	1.12607e-06	2.66815e-06	501	501
C14orf156	0.145134	0.00112321	0.00196594	501	501
C14orf159	0.320505	1.97107e-13	8.12864e-13	501	501
C14orf162	0.199555	6.76886e-06	1.49521e-05	501	174
C14orf165	0.00408696	0.927294	0.941036	501	18
C14orf166B	0.0494838	0.26894	0.324405	501	120
C14orf166	-0.0768765	0.0856187	0.114914	501	501
C14orf167	0.374322	4.13887e-18	2.41226e-17	501	501
C14orf169	0.0195479	0.662481	0.71285	501	501
C14orf174	0.303319	4.02472e-12	1.50611e-11	501	500
C14orf176	0.590919	1.72636e-48	9.17364e-47	501	501
C14orf177	0.0640087	0.152545	0.194732	501	12
C14orf178	0.148016	0.00089027	0.00157847	501	442
C14orf179	0.379462	1.32382e-18	7.99872e-18	501	501
C14orf180	0.316255	4.23264e-13	1.70633e-12	501	230
C14orf181	0.481033	2.2435e-30	3.23022e-29	501	501
C14orf182	-0.286137	6.77565e-11	2.30368e-10	501	469
C14orf183	0.107051	0.0165281	0.0249966	501	94
C14orf184	0.0455966	0.308407	0.366399	501	171
C14orf19	-0.0389064	0.384849	0.445995	501	496
C14orf1	0.156829	0.000426112	0.00078317	501	501
C14orf21	-0.247387	2.01294e-08	5.54337e-08	501	501
C14orf23	-0.0377187	0.399536	0.460818	501	49
C14orf28	0.445609	8.22541e-26	8.39261e-25	501	501
C14orf2	0.253705	8.46152e-09	2.41255e-08	501	501
C14orf33	0.312228	8.6338e-13	3.39743e-12	501	501
C14orf34	-0.347049	1.25891e-15	6.10076e-15	501	277
C14orf37	0.00965194	0.829374	0.859475	501	501
C14orf39	0.0842265	0.0595808	0.0823689	501	277
C14orf43	0.145259	0.00111209	0.00194854	501	501
C14orf45	0.342724	2.96609e-15	1.39927e-14	501	501
C14orf48	-0.0292228	0.514014	0.574306	501	126
C14orf49	-0.0244127	0.585653	0.64179	501	501
C14orf4	-0.196994	8.91606e-06	1.94665e-05	501	501
C14orf50	0.251838	1.09582e-08	3.08861e-08	501	499
C14orf53	0.0295334	0.509549	0.569893	501	43
C14orf64	0.466124	2.17274e-28	2.7111e-27	501	500
C14orf68	0.519751	5.16039e-36	1.15024e-34	501	458
C14orf70	0.0183488	0.682018	0.73048	501	6
C14orf72	0.139419	0.00175931	0.00301079	501	496
C14orf73	-0.124261	0.00534971	0.00862211	501	471
C14orf79	0.354177	2.97819e-16	1.4994e-15	501	501
C14orf80	-0.00572591	0.898272	0.917403	501	501
C14orf86	0.285095	7.99188e-11	2.70105e-10	501	403
C14orf93	0.190944	1.68591e-05	3.58157e-05	501	501
C15orf17	0.143222	0.00130755	0.00226984	501	501
C15orf21	-0.104299	0.0195393	0.0292005	501	501
C15orf23	0.170465	0.000126033	0.000244566	501	501
C15orf24	0.193154	1.33891e-05	2.8701e-05	501	501
C15orf26	0.38222	7.12057e-19	4.39429e-18	501	482
C15orf27	0.0913939	0.0408703	0.0581149	501	498
C15orf28	0.0815224	0.0682738	0.0933378	501	473
C15orf29	0.0306828	0.493205	0.55407	501	501
C15orf2	0.245726	2.51817e-08	6.87768e-08	501	445
C15orf32	-0.0176327	0.693789	0.740928	501	47
C15orf33	0.266717	1.31754e-09	4.02186e-09	501	500
C15orf34	0.245027	2.76582e-08	7.52109e-08	501	501
C15orf37	0.265605	1.5508e-09	4.69932e-09	501	501
C15orf38	-0.30215	4.90659e-12	1.82278e-11	501	501
C15orf39	0.00425895	0.924243	0.938423	501	501
C15orf40	0.286782	6.11498e-11	2.08617e-10	501	501
C15orf41	0.166025	0.000189373	0.000361321	501	501
C15orf42	-0.00584548	0.89616	0.915689	501	501
C15orf43	0.270611	7.4039e-10	2.30961e-09	501	70
C15orf44	-0.0148018	0.741022	0.782697	501	501
C15orf48	-0.594064	4.09836e-49	2.28762e-47	501	501
C15orf50	-0.00512782	0.908849	0.925996	501	102
C15orf51	0.413057	4.5931e-22	3.57247e-21	501	500
C15orf52	0.12303	0.00582644	0.00934359	501	501
C15orf53	-0.280185	1.7248e-10	5.65762e-10	501	248
C15orf54	-0.179262	5.45683e-05	0.000110092	501	470
C15orf55	-0.101607	0.0229373	0.0338974	501	225
C15orf56	0.538053	6.09402e-39	1.6913e-37	501	501
C15orf57	0.164657	0.000214241	0.000406318	501	501
C15orf58	0.0991689	0.0264439	0.0386694	501	501
C15orf59	0.352396	4.2838e-16	2.13302e-15	501	499
C15orf5	0.000461182	0.991784	0.99343	501	187
C15orf60	0.0464831	0.299087	0.356795	501	102
C15orf61	0.407122	2.00608e-21	1.49719e-20	501	501
C15orf62	-0.522293	2.07282e-36	4.80292e-35	501	501
C15orf63	0.0857831	0.055006	0.0764849	501	501
C16orf11	-0.0758917	0.0897171	0.119881	501	153
C16orf13	0.0525355	0.240484	0.293689	501	501
C16orf3	0.237066	7.88537e-08	2.06644e-07	501	480
C16orf42	-0.0352756	0.430786	0.492105	501	501
C16orf45	-0.119112	0.00760923	0.0120331	501	501
C16orf46	0.646774	1.07178e-60	1.30228e-58	501	501
C16orf48	0.365667	2.69663e-17	1.46939e-16	501	501
C16orf52	0.376466	2.57866e-18	1.52555e-17	501	501
C16orf53	0.392423	6.81875e-20	4.5368e-19	501	501
C16orf54	-0.284356	8.98262e-11	3.02002e-10	501	501
C16orf55	0.426406	1.49461e-23	1.29099e-22	501	501
C16orf57	-0.154685	0.00051159	0.000931681	501	501
C16orf58	0.415622	2.40666e-22	1.91065e-21	501	501
C16orf59	-0.052684	0.239156	0.292246	501	501
C16orf5	0.373222	5.26897e-18	3.04509e-17	501	501
C16orf61	0.263877	1.99465e-09	5.98425e-09	501	501
C16orf62	-0.206285	3.22548e-06	7.33305e-06	501	501
C16orf63	0.280718	1.58778e-10	5.22709e-10	501	501
C16orf68	0.363044	4.7065e-17	2.51641e-16	501	501
C16orf70	0.271897	6.10812e-10	1.92012e-09	501	501
C16orf71	0.47143	4.37967e-29	5.73039e-28	501	500
C16orf72	0.0532713	0.233952	0.286376	501	501
C16orf73	0.180273	4.94373e-05	0.000100156	501	273
C16orf74	0.432898	2.67167e-24	2.42765e-23	501	501
C16orf75	-0.342968	2.82732e-15	1.33444e-14	501	501
C16orf78	-0.0286249	0.522665	0.582633	501	16
C16orf79	0.353673	3.3015e-16	1.6559e-15	501	501
C16orf7	0.0489897	0.273755	0.329574	501	501
C16orf80	0.338353	6.95787e-15	3.19322e-14	501	501
C16orf81	0.119931	0.00720072	0.011427	501	220
C16orf82	-0.0415269	0.353627	0.413734	501	119
C16orf86	0.367882	1.67844e-17	9.30354e-17	501	501
C16orf87	0.00601967	0.893084	0.913357	501	501
C16orf88	-0.215087	1.17821e-06	2.7854e-06	501	501
C16orf89	0.651515	7.4848e-62	9.94331e-60	501	501
C16orf90	-0.00417745	0.925688	0.93955	501	67
C16orf91	0.173616	9.38189e-05	0.000184408	501	501
C16orf92	-0.030977	0.489068	0.550035	501	48
C16orf93	0.230368	1.85061e-07	4.70132e-07	501	501
C17orf100	0.157749	0.000393659	0.000726404	501	501
C17orf101	0.0660094	0.140103	0.180211	501	501
C17orf102	0.0816834	0.0677284	0.0926812	501	253
C17orf103	0.190015	1.856e-05	3.92492e-05	501	501
C17orf104	0.304999	3.02257e-12	1.14268e-11	501	500
C17orf105	0.0352163	0.431562	0.492849	501	45
C17orf106	-0.0165721	0.711359	0.756618	501	501
C17orf107	-0.312648	8.01915e-13	3.16431e-12	501	501
C17orf108	0.413269	4.35506e-22	3.38997e-21	501	501
C17orf28	0.366318	2.34657e-17	1.28426e-16	501	501
C17orf37	0.257719	4.81991e-09	1.40378e-08	501	501
C17orf39	0.346183	1.49641e-15	7.20438e-15	501	501
C17orf42	0.249967	1.41701e-08	3.95031e-08	501	501
C17orf44	-0.0739994	0.0980335	0.130044	501	501
C17orf46	-0.185589	2.91468e-05	6.04757e-05	501	489
C17orf47	0.491638	7.54432e-32	1.22324e-30	501	434
C17orf48	0.229955	1.94902e-07	4.93998e-07	501	501
C17orf49	-0.125544	0.00489007	0.00792038	501	501
C17orf50	0.47383	2.10216e-29	2.81707e-28	501	488
C17orf51	0.174652	8.50414e-05	0.000167801	501	501
C17orf53	-0.503089	1.68935e-33	3.10002e-32	501	501
C17orf54	-0.065026	0.146118	0.187307	501	58
C17orf55	0.255195	6.87437e-09	1.97528e-08	501	501
C17orf56	0.274066	4.40521e-10	1.39737e-09	501	501
C17orf57	0.293679	2.00828e-11	7.11448e-11	501	501
C17orf58	0.133059	0.00284415	0.00475106	501	501
C17orf59	0.178149	6.08045e-05	0.000122056	501	501
C17orf60	-0.418441	1.17515e-22	9.51531e-22	501	499
C17orf61	0.02543	0.570123	0.627394	501	501
C17orf62	-0.427599	1.09238e-23	9.52221e-23	501	501
C17orf63	0.00362668	0.935463	0.947685	501	501
C17orf64	-0.0321584	0.47264	0.533917	501	252
C17orf65	0.226782	2.89149e-07	7.22583e-07	501	501
C17orf66	-0.0258954	0.563084	0.621295	501	226
C17orf67	0.0758877	0.0897343	0.119896	501	501
C17orf68	-0.152284	0.000626164	0.00112909	501	501
C17orf69	0.456297	3.92446e-27	4.41823e-26	501	501
C17orf70	0.114228	0.0105048	0.0163118	501	501
C17orf71	-0.0581702	0.193644	0.241677	501	501
C17orf72	0.247271	2.04489e-08	5.62748e-08	501	501
C17orf73	-0.0117945	0.792283	0.827497	501	9
C17orf74	0.115531	0.00964953	0.0150635	501	62
C17orf75	0.109626	0.0140871	0.0215189	501	501
[truncated: 17,928 more rows]

## Sheet: Differential expression genes
gene_name	gene_biotype	baseMean	log2FoldChange	pvalue	padj
COL9A3	protein_coding	4608.77	4.39105	4.42443e-99	4.38251e-95
NR2E1	protein_coding	9.07049	4.18458	1.21941e-36	7.39881e-35
APOA4	protein_coding	10.8743	3.87845	1.31681e-29	4.35142e-28
RAG2	protein_coding	164.455	3.86937	1.00379e-40	8.91726e-39
BTBD17	protein_coding	32.363	3.85284	2.7552e-49	5.43104e-47
PRRT4	protein_coding	161.142	3.80029	2.03938e-93	1.61604e-89
SLC14A2	protein_coding	311.365	3.75776	1.39401e-88	6.90402e-85
CARTPT	protein_coding	482.002	3.53483	4.48499e-25	9.72633e-24
PPY	protein_coding	16.6305	3.38519	1.37383e-29	4.52097e-28
IRX6	protein_coding	113.999	3.21483	2.4334e-46	3.67991e-44
MT1H	protein_coding	1828.01	3.17646	1.40618e-41	1.33929e-39
GNAT3	protein_coding	2.00451	3.08167	1.86209e-20	2.59143e-19
PAX1	protein_coding	60.9303	3.04435	8.53184e-27	2.16e-25
ABCC12	protein_coding	18.0268	2.99688	5.38815e-27	1.38897e-25
GLDC	protein_coding	381.543	2.98071	2.96777e-54	9.11519e-52
TBXT	protein_coding	15.3192	2.96481	2.7511e-33	1.24289e-31
BMP8A	protein_coding	467.206	2.91095	3.33278e-57	1.30741e-54
FER1L6	protein_coding	76.9927	2.90387	2.63952e-37	1.70049e-35
SKOR2	protein_coding	11.9807	2.8998	2.19578e-15	1.90913e-14
SEMA3D	protein_coding	1546.08	2.89104	7.56584e-45	9.79628e-43
PLP1	protein_coding	234.511	2.88818	9.54123e-38	6.35349e-36
KRT85	protein_coding	12.5496	2.87942	5.06197e-32	2.07405e-30
SMIM32	protein_coding	27.4888	2.82779	5.83321e-36	3.30168e-34
CNTFR	protein_coding	359.144	2.79324	2.93142e-33	1.32134e-31
RGS8	protein_coding	354.312	2.77504	3.09157e-38	2.15653e-36
MT1G	protein_coding	16378.7	2.75464	8.13187e-35	4.20069e-33
TUNAR	protein_coding	109.784	2.74934	1.40202e-17	1.49206e-16
KCNK16	protein_coding	82.1472	2.69972	5.28884e-25	1.13824e-23
SFRP1	protein_coding	1026.16	2.69546	1.39755e-59	6.08487e-57
MROH2A	protein_coding	185.064	2.63554	1.89889e-20	2.63986e-19
CIB4	protein_coding	58.9742	2.59746	6.90646e-38	4.62231e-36
KRT25	protein_coding	1.66935	2.59124	6.04796e-11	3.33324e-10
TECTB	protein_coding	18.1393	2.58408	9.39412e-34	4.43101e-32
LRTM2	protein_coding	7.53371	2.57776	2.94949e-27	7.82732e-26
C8A	protein_coding	27.34	2.5475	1.74697e-32	7.44266e-31
SPHKAP	protein_coding	15.156	2.53053	1.5214e-16	1.47925e-15
NAT16	protein_coding	134.624	2.50958	3.87508e-39	3.00459e-37
SOX3	protein_coding	54.7577	2.50791	1.7633e-16	1.70316e-15
ATP2B3	protein_coding	2.79655	2.50113	1.33977e-18	1.56357e-17
MMEL1	protein_coding	48.1056	2.46511	3.66242e-51	8.58633e-49
LMNTD1	protein_coding	9.01255	2.46227	6.24569e-30	2.13144e-28
INSYN2B	protein_coding	20.1466	2.46067	1.25288e-26	3.12596e-25
SLC5A7	protein_coding	33.8878	2.44989	7.51413e-18	8.19706e-17
CA4	protein_coding	714.517	2.43547	3.82014e-47	6.12785e-45
FLRT1	protein_coding	295.624	2.40684	2.08876e-45	2.86362e-43
GABRG1	protein_coding	30.1646	2.39129	3.40544e-47	5.50722e-45
SEMG1	protein_coding	0.785254	2.37441	5.20341e-05	0.000141703
AGTR1	protein_coding	132.464	2.35661	6.52033e-56	2.32741e-53
DIO1	protein_coding	6053.17	2.35056	4.47413e-28	1.28289e-26
GMNC	protein_coding	9.78257	2.34281	1.43916e-20	2.02244e-19
STXBP5L	protein_coding	358.366	2.33767	6.23471e-40	5.10384e-38
POPDC3	protein_coding	42.078	2.31029	7.12463e-23	1.24355e-21
NEB	protein_coding	804.867	2.29403	5.155e-39	3.93538e-37
PLEKHD1	protein_coding	166.026	2.28709	1.31108e-45	1.86857e-43
WSCD2	protein_coding	1044.19	2.28329	2.57103e-29	8.21507e-28
SMR3B	protein_coding	26.3625	2.27101	4.79917e-13	3.31962e-12
KRT71	protein_coding	4.26364	2.26619	2.09753e-26	5.13318e-25
CUX2	protein_coding	380.492	2.26176	2.0664e-18	2.37313e-17
TPO	protein_coding	78543.4	2.25886	3.69845e-30	1.28653e-28
LHFPL3	protein_coding	1.8166	2.22649	1.97923e-16	1.90477e-15
SLCO6A1	protein_coding	0.789612	2.20965	7.9001e-05	0.000209469
AL035425.2	protein_coding	1.52088	2.20915	1.08675e-16	1.07137e-15
NOX5	protein_coding	309.185	2.19445	3.52578e-41	3.2639e-39
SLC7A10	protein_coding	33.7784	2.19314	2.18405e-37	1.42326e-35
KCNJ13	protein_coding	126.53	2.18957	1.87009e-39	1.47306e-37
APOA5	protein_coding	3.59717	2.16746	2.14723e-17	2.25664e-16
KCNAB1	protein_coding	3008.82	2.16244	3.18745e-54	9.71462e-52
TMEM238L	protein_coding	2.74737	2.16089	6.30495e-25	1.34886e-23
C20orf85	protein_coding	1.7453	2.15905	7.88478e-06	2.398e-05
ALX4	protein_coding	15.5771	2.15835	6.82406e-39	5.15002e-37
COL25A1	protein_coding	155.923	2.14387	5.72548e-63	3.97981e-60
EPPIN	protein_coding	8.52891	2.14323	2.48468e-22	4.12769e-21
SOSTDC1	protein_coding	55.5679	2.13692	1.1433e-31	4.52083e-30
WFDC6	protein_coding	1.6721	2.13465	1.08131e-13	7.96775e-13
IRS4	protein_coding	38.7499	2.13284	5.90261e-28	1.67287e-26
ZNF804B	protein_coding	101.887	2.131	3.68289e-14	2.85781e-13
LRP1B	protein_coding	333.849	2.10521	2.31649e-26	5.63769e-25
MRO	protein_coding	255.146	2.10445	5.96995e-35	3.13707e-33
TBATA	protein_coding	2.09578	2.10213	3.25873e-13	2.29048e-12
KIF1A	protein_coding	434.095	2.10098	4.29782e-26	1.02519e-24
IL1RAPL1	protein_coding	6.27524	2.09982	6.51934e-24	1.2576e-22
TRAPPC3L	protein_coding	34.0361	2.09851	1.27713e-47	2.13506e-45
TBX22	protein_coding	31.1899	2.09763	2.25287e-22	3.7552e-21
TAFA2	protein_coding	562.798	2.07187	1.54857e-47	2.5672e-45
BPIFB3	protein_coding	0.561288	2.0633	0.000103853	0.000270897
PKHD1L1	protein_coding	3101	2.06048	9.54606e-21	1.36395e-19
CAPSL	protein_coding	112.17	2.04666	7.78168e-40	6.31799e-38
EPHA5	protein_coding	63.9765	2.03128	8.76781e-20	1.14764e-18
DRD1	protein_coding	8.87155	2.02776	9.32358e-26	2.16409e-24
CRABP1	protein_coding	2057.17	2.02515	1.26362e-26	3.15078e-25
CLCNKA	protein_coding	361.25	2.0226	6.97695e-28	1.9647e-26
CSAG1	protein_coding	17.9358	2.01303	3.74577e-19	4.58625e-18
ZMAT4	protein_coding	439.15	2.01272	4.13183e-17	4.2247e-16
LIPI	protein_coding	50.3363	2.00559	4.48863e-18	4.99843e-17
NWD2	protein_coding	9.66521	2.00385	4.06173e-12	2.53956e-11
HGD	protein_coding	1354.41	2.0015	4.2424e-42	4.25539e-40
SLC26A3	protein_coding	16.8672	1.99795	7.96157e-35	4.12347e-33
GRIK4	protein_coding	273.553	1.99775	3.01067e-44	3.62571e-42
LMX1B	protein_coding	40.9047	1.99487	1.48489e-22	2.5153e-21
MPPED2	protein_coding	867.661	1.99182	2.34494e-45	3.19274e-43
APOC3	protein_coding	0.799844	1.98495	5.19428e-08	2.06608e-07
BCHE	protein_coding	196.855	1.97753	2.46187e-25	5.46759e-24
GABRR3	protein_coding	1.85285	1.97571	7.36598e-21	1.06436e-19
ADIG	protein_coding	41.5593	1.96387	2.64348e-28	7.72968e-27
KLHL1	protein_coding	0.843212	1.9636	5.05633e-10	2.52663e-09
DMRTB1	protein_coding	14.4294	1.95966	1.49799e-10	7.89886e-10
ENPP3	protein_coding	213.606	1.95918	1.82134e-28	5.41766e-27
LEFTY2	protein_coding	8.95832	1.95707	1.73427e-25	3.91529e-24
TEX47	protein_coding	1.01171	1.9568	2.14837e-10	1.11514e-09
MSI1	protein_coding	165.405	1.9565	1.16254e-35	6.44211e-34
PYGM	protein_coding	426.275	1.95268	1.06423e-40	9.43306e-39
SLC4A4	protein_coding	1838.23	1.94004	2.96094e-41	2.74744e-39
MT1F	protein_coding	7099.94	1.93903	2.59605e-34	1.30036e-32
FAM167A	protein_coding	4919.47	1.93758	3.30395e-40	2.83961e-38
ANKRD30BL	protein_coding	4.62272	1.92158	5.15124e-14	3.93479e-13
MIOX	protein_coding	382.202	1.92112	9.12644e-45	1.17022e-42
STRA8	protein_coding	0.718957	1.9152	1.832e-11	1.07106e-10
GOLGA8M	protein_coding	108.983	1.9055	4.52313e-42	4.52553e-40
IGDCC3	protein_coding	210.016	1.8988	1.44622e-44	1.81331e-42
NPPC	protein_coding	66.4084	1.89789	1.16032e-24	2.40822e-23
SLC5A8	protein_coding	1379.82	1.89423	8.28542e-21	1.19113e-19
SPX	protein_coding	585.195	1.88502	4.37402e-44	5.15783e-42
CALHM4	protein_coding	2.92323	1.88059	1.43678e-18	1.67481e-17
TMEM213	protein_coding	4.23281	1.85973	2.55215e-13	1.81151e-12
GCK	protein_coding	45.9354	1.85543	6.27303e-35	3.27462e-33
CDH16	protein_coding	1211.16	1.85164	6.92715e-20	9.15479e-19
KCNJ3	protein_coding	9.41711	1.83826	2.77486e-18	3.14662e-17
TERB2	protein_coding	1.35613	1.83733	5.31832e-14	4.05538e-13
TRPM3	protein_coding	77.4316	1.83604	5.01573e-27	1.29803e-25
GDF10	protein_coding	148.693	1.83574	2.32065e-20	3.19592e-19
ZNF536	protein_coding	92.7438	1.83297	7.39033e-19	8.83028e-18
GJA3	protein_coding	99.0515	1.82932	2.08262e-31	8.08974e-30
GPR142	protein_coding	5.95588	1.82895	3.14261e-17	3.24846e-16
ADARB2	protein_coding	27.1446	1.82814	4.96748e-17	5.05565e-16
CSMD1	protein_coding	374.938	1.81787	2.02205e-25	4.53657e-24
CFAP47	protein_coding	18.7099	1.81607	1.26645e-23	2.38603e-22
CD36	protein_coding	2104.2	1.81242	4.51352e-48	7.84343e-46
FABP4	protein_coding	630.355	1.81092	5.54381e-23	9.76662e-22
EDN3	protein_coding	1294.47	1.80413	3.05906e-17	3.16385e-16
SLITRK5	protein_coding	173.021	1.80409	2.25323e-24	4.55021e-23
OR11L1	protein_coding	1.02647	1.80093	2.71868e-14	2.14148e-13
CABCOCO1	protein_coding	47.339	1.7991	1.30583e-29	4.31873e-28
ABCC8	protein_coding	460.522	1.79779	1.23812e-22	2.11812e-21
TEKT4	protein_coding	35.0907	1.79249	2.30511e-28	6.78535e-27
RFX4	protein_coding	9.21184	1.79072	5.49324e-31	2.0551e-29
ETNPPL	protein_coding	61.1646	1.78819	1.04928e-14	8.57717e-14
FAM189A1	protein_coding	307.377	1.78062	3.6257e-34	1.7757e-32
FAM163A	protein_coding	41.356	1.7774	1.01526e-23	1.92836e-22
TFCP2L1	protein_coding	2065.7	1.77221	6.70227e-36	3.78277e-34
BTNL3	protein_coding	4.0233	1.77141	4.41029e-20	5.91336e-19
OLFM3	protein_coding	12.7412	1.76875	3.34577e-17	3.45216e-16
PIWIL1	protein_coding	911.951	1.76357	1.61676e-23	3.00882e-22
NELL1	protein_coding	2.08775	1.76323	1.65102e-14	1.32823e-13
ASXL3	protein_coding	104.188	1.76214	4.44521e-25	9.64534e-24
PDE7B	protein_coding	896.589	1.75753	6.91312e-103	1.36952e-98
GALR1	protein_coding	10.6536	1.75751	7.81898e-27	1.98842e-25
TNN	protein_coding	142.935	1.75719	5.85839e-32	2.38311e-30
SLC29A4	protein_coding	659.427	1.75462	1.34147e-41	1.28073e-39
WFDC8	protein_coding	4.91668	1.75448	2.25656e-18	2.58253e-17
HSPB7	protein_coding	954.231	1.74702	6.2441e-31	2.32298e-29
GRIN2C	protein_coding	1214.58	1.74526	6.24388e-25	1.33651e-23
PKNOX2	protein_coding	867.044	1.73773	2.93321e-23	5.3067e-22
C10orf90	protein_coding	28.3404	1.73439	1.07881e-14	8.81128e-14
GJD4	protein_coding	6.10664	1.73369	1.68845e-22	2.84309e-21
H1-6	protein_coding	1.4184	1.72855	4.09299e-17	4.18715e-16
SCGN	protein_coding	23.3522	1.72461	4.15341e-21	6.16568e-20
C11orf97	protein_coding	0.669345	1.71825	3.25501e-07	1.17232e-06
FAM240C	protein_coding	133.909	1.71669	1.19023e-28	3.59438e-27
DUOXA2	protein_coding	2909.88	1.71113	2.0427e-53	5.82257e-51
DGAT2	protein_coding	2384.79	1.71027	1.69187e-58	7.05615e-56
GAPDHS	protein_coding	1.47676	1.71023	1.48204e-14	1.19788e-13
TSPAN19	protein_coding	5.12249	1.70558	8.78686e-17	8.72105e-16
SLC25A47	protein_coding	23.3159	1.70547	1.37321e-25	3.1287e-24
SPINK5	protein_coding	147.481	1.70266	1.66225e-37	1.08859e-35
RIPOR3	protein_coding	162.156	1.69629	7.33853e-68	7.09171e-65
C1orf158	protein_coding	10.2628	1.69388	8.63845e-13	5.82081e-12
GP9	protein_coding	2.44176	1.69382	6.16452e-24	1.19552e-22
DNTT	protein_coding	10.2463	1.69014	2.21368e-14	1.75839e-13
ADGRV1	protein_coding	414.375	1.68496	2.55231e-38	1.81228e-36
FOXJ1	protein_coding	199.315	1.68381	3.00252e-21	4.50106e-20
KIF19	protein_coding	155.666	1.68311	2.57148e-22	4.26296e-21
RGS17	protein_coding	187.884	1.68228	4.72867e-49	9.05095e-47
BTNL8	protein_coding	12.7154	1.68161	1.25724e-39	1.00836e-37
HMGCS2	protein_coding	15.4555	1.68016	1.77426e-10	9.2717e-10
SLC6A17	protein_coding	80.2257	1.67194	5.41077e-21	7.9459e-20
LINGO2	protein_coding	84.9985	1.66931	3.52414e-15	3.00719e-14
CD300LG	protein_coding	48.9693	1.66847	7.37885e-24	1.41646e-22
KIT	protein_coding	1967.59	1.66736	1.79919e-31	7.03014e-30
AMER2	protein_coding	6.01966	1.66547	1.13351e-12	7.54801e-12
AVPR1A	protein_coding	500.311	1.66493	2.11858e-36	1.24356e-34
CATSPERZ	protein_coding	1.1725	1.66106	7.80241e-16	7.08385e-15
DPP6	protein_coding	779.468	1.66078	8.22838e-16	7.45181e-15
HEMGN	protein_coding	5.74137	1.65559	1.11154e-17	1.19383e-16
GOLGA8J	protein_coding	0.901008	1.65499	1.0038e-11	6.02876e-11
TFF2	protein_coding	11.9928	1.65468	7.34219e-08	2.86606e-07
C14orf180	protein_coding	5.6043	1.65345	1.22487e-09	5.84987e-09
SLC26A4	protein_coding	13195.5	1.64685	1.02319e-29	3.40672e-28
DUOX2	protein_coding	35450.5	1.64069	2.06413e-62	1.2582e-59
EBF4	protein_coding	2202.26	1.63981	1.41759e-36	8.47154e-35
PRLHR	protein_coding	10.3516	1.6393	7.72894e-08	3.00725e-07
ANKRD66	protein_coding	1.91346	1.63357	1.40604e-10	7.43079e-10
SCUBE1	protein_coding	456.641	1.62779	1.84262e-31	7.17861e-30
HAPLN2	protein_coding	13.3671	1.62647	2.29354e-35	1.24313e-33
KHDRBS2	protein_coding	224.213	1.62235	7.41781e-36	4.16291e-34
TMEM215	protein_coding	1077.29	1.62112	1.08763e-17	1.16974e-16
KCNK17	protein_coding	252.59	1.61885	4.45552e-22	7.22605e-21
CTNNA2	protein_coding	17.2249	1.61567	3.99633e-18	4.47537e-17
EPPIN-WFDC6	protein_coding	0.455756	1.61509	0.000180907	0.000455701
H4C8	protein_coding	96.1895	1.61508	1.36626e-52	3.65762e-50
GOLGA8Q	protein_coding	28.5619	1.61313	1.85986e-21	2.8353e-20
PAX7	protein_coding	1.21668	1.61074	0.000272334	0.000667293
TACR3	protein_coding	3.16264	1.60103	4.99898e-14	3.82438e-13
SFTPC	protein_coding	78.676	1.60006	2.35871e-17	2.46972e-16
TAS1R1	protein_coding	12.6468	1.59926	4.43428e-23	7.89746e-22
MEGF11	protein_coding	47.6544	1.5933	9.57421e-25	2.01028e-23
NEU4	protein_coding	21.1171	1.58135	1.13974e-18	1.33602e-17
TMEM174	protein_coding	1.61214	1.581	5.26432e-07	1.8509e-06
ALPG	protein_coding	2.52037	1.57959	3.6358e-07	1.30224e-06
NXPH4	protein_coding	50.0622	1.57851	1.25764e-32	5.40445e-31
SERPIND1	protein_coding	26.1232	1.57649	2.1248e-14	1.69049e-13
CYP26B1	protein_coding	397.86	1.57627	3.60821e-41	3.32467e-39
SH2D6	protein_coding	73.3712	1.57425	1.78911e-28	5.3258e-27
SLC26A7	protein_coding	12127.1	1.57422	1.13251e-31	4.48264e-30
RPH3A	protein_coding	25.8565	1.57334	1.48713e-18	1.72943e-17
NWD1	protein_coding	129.21	1.57122	1.26481e-21	1.95753e-20
WNT4	protein_coding	348.385	1.56918	5.59334e-23	9.84513e-22
GOLGA8O	protein_coding	11.5464	1.56556	4.60996e-24	9.06907e-23
FADS6	protein_coding	4.44789	1.56412	1.39863e-10	7.39657e-10
SERPINB11	protein_coding	1.55193	1.5553	0.00152843	0.00333763
TBR1	protein_coding	1.15623	1.55414	1.78757e-09	8.39361e-09
LGI3	protein_coding	1248.17	1.54177	8.50963e-29	2.60758e-27
KCNE3	protein_coding	866.429	1.5388	2.58298e-72	3.79039e-69
UGT1A6	protein_coding	0.973959	1.5383	3.37895e-06	1.07705e-05
PRAMEF17	protein_coding	1.58017	1.53803	3.66685e-08	1.48264e-07
PVALB	protein_coding	48.5462	1.53143	1.62134e-13	1.17449e-12
HSD11B2	protein_coding	562.151	1.53029	3.25231e-38	2.25674e-36
PLD5	protein_coding	9.11079	1.52163	1.10421e-19	1.43114e-18
EDNRB	protein_coding	2963.6	1.51949	4.43146e-77	9.75438e-74
IGFBPL1	protein_coding	132.081	1.51523	6.86939e-21	9.97699e-20
SLC13A2	protein_coding	1.05806	1.50867	5.28055e-09	2.35503e-08
SLC22A24	protein_coding	0.828777	1.5073	5.99446e-05	0.000161756
ELAPOR1	protein_coding	1046.51	1.50729	2.85481e-17	2.96333e-16
P2RX3	protein_coding	5.7473	1.50682	1.02953e-24	2.15256e-23
TCF7L1	protein_coding	1248.31	1.50651	1.17504e-68	1.25828e-65
OTOS	protein_coding	1142.81	1.50618	5.35013e-22	8.62047e-21
CHRNA4	protein_coding	120.772	1.50613	5.09353e-13	3.51342e-12
VIPR1	protein_coding	308.873	1.5032	1.88753e-43	2.14286e-41
SERTM1	protein_coding	255.827	1.5031	3.96524e-11	2.23099e-10
CXXC4	protein_coding	558.546	1.50099	1.7949e-51	4.41713e-49
FHL1	protein_coding	12956.7	1.49915	6.10678e-40	5.01985e-38
GNA14	protein_coding	815.082	1.49606	4.07267e-49	7.87138e-47
ITPR1	protein_coding	3808.93	1.49572	2.25116e-50	4.87395e-48
HLF	protein_coding	1379.88	1.49513	2.11852e-38	1.51787e-36
ELMO1	protein_coding	3237.2	1.49503	3.68521e-45	4.93283e-43
SRARP	protein_coding	16.5956	1.49266	1.86684e-10	9.74132e-10
GABRB3	protein_coding	843.167	1.48655	1.85021e-22	3.10492e-21
QRFPR	protein_coding	74.8925	1.48612	8.87924e-25	1.86965e-23
TFF1	protein_coding	9.09215	1.48446	5.99447e-08	2.36467e-07
FAM47C	protein_coding	0.744064	1.48415	3.37997e-10	1.71755e-09
PRR9	protein_coding	5.38321	1.48382	2.32667e-13	1.66069e-12
CECR2	protein_coding	97.8637	1.48331	8.14226e-29	2.49887e-27
UGT3A2	protein_coding	31.7401	1.48291	5.50649e-14	4.1916e-13
BTBD11	protein_coding	1865.18	1.47954	2.91247e-48	5.22149e-46
IPCEF1	protein_coding	1186.52	1.47938	1.12804e-24	2.34491e-23
TBX2	protein_coding	1365.45	1.47307	1.86118e-54	5.85252e-52
SCN3A	protein_coding	66.0699	1.47189	1.2963e-23	2.43994e-22
CETP	protein_coding	296.94	1.46989	9.80459e-49	1.81527e-46
APOA1	protein_coding	128.221	1.46978	7.08334e-18	7.74631e-17
FAM155B	protein_coding	2165.6	1.46692	2.54113e-27	6.77538e-26
NPY5R	protein_coding	9.2568	1.46588	2.51124e-23	4.58515e-22
FGF12	protein_coding	346.489	1.46579	1.50666e-34	7.67291e-33
AQP12B	protein_coding	0.695091	1.46568	0.00164011	0.00356069
BANF2	protein_coding	5.87742	1.46098	1.00825e-09	4.85924e-09
CCDC178	protein_coding	43.8478	1.45485	9.99681e-34	4.6985e-32
GPR158	protein_coding	51.875	1.45126	2.04581e-21	3.10801e-20
GJB1	protein_coding	11.5338	1.44565	2.31999e-09	1.07497e-08
SLC5A5	protein_coding	272.079	1.44305	8.86047e-10	4.30063e-09
KRT222	protein_coding	99.8474	1.44212	1.34619e-23	2.52425e-22
TENM2	protein_coding	96.6498	1.44193	2.12127e-17	2.22995e-16
NOS1	protein_coding	25.8352	1.44125	2.86282e-19	3.56019e-18
ALLC	protein_coding	0.946922	1.44109	2.98896e-09	1.36734e-08
SLC2A4	protein_coding	252.5	1.44002	5.11481e-39	3.91224e-37
GOLGA8R	protein_coding	81.3416	1.43949	1.63476e-39	1.29283e-37
FCN2	protein_coding	2.09309	1.43707	8.57093e-12	5.18219e-11
KIF5C	protein_coding	412.579	1.43545	3.69069e-30	1.28496e-28
CDON	protein_coding	1882.74	1.43322	2.71009e-49	5.36884e-47
CNTN5	protein_coding	105.052	1.42855	8.34167e-21	1.19879e-19
SCGB3A2	protein_coding	8.14789	1.42649	5.85574e-08	2.31243e-07
WNT3A	protein_coding	6.77201	1.42634	4.71942e-15	3.98525e-14
LRRTM1	protein_coding	210.949	1.42601	4.8492e-11	2.70606e-10
CTAG2	protein_coding	0.945683	1.42543	0.022608	0.0396334
ADM2	protein_coding	1701.96	1.42483	8.33508e-30	2.81538e-28
KCTD8	protein_coding	162.503	1.4235	1.58987e-28	4.75413e-27
GALNT17	protein_coding	1068.05	1.42045	1.50325e-35	8.23565e-34
SLC10A4	protein_coding	39.7711	1.41932	3.81945e-42	3.85065e-40
SGIP1	protein_coding	643.802	1.41244	2.67562e-26	6.47988e-25
CROCC2	protein_coding	5.69332	1.41194	5.78345e-14	4.39482e-13
MYOC	protein_coding	100.095	1.41182	9.80748e-09	4.23384e-08
COL9A1	protein_coding	44.4778	1.40983	7.50092e-35	3.89507e-33
DNAAF1	protein_coding	169.765	1.40817	1.51765e-38	1.1013e-36
GLP1R	protein_coding	127.974	1.40711	7.24834e-15	6.01186e-14
KCNA2	protein_coding	41.2885	1.40667	2.12758e-13	1.52739e-12
EPHA8	protein_coding	3.41351	1.40631	1.39193e-12	9.18852e-12
TRPV6	protein_coding	237.948	1.40449	6.24141e-23	1.09421e-21
CWH43	protein_coding	383.182	1.40404	1.24369e-14	1.01017e-13
SLC5A4	protein_coding	38.9806	1.40114	4.30469e-57	1.67212e-54
C19orf81	protein_coding	26.3802	1.39886	3.63571e-13	2.54147e-12
NME8	protein_coding	36.9869	1.39212	3.61172e-19	4.43171e-18
LAMC3	protein_coding	174.012	1.39171	1.73929e-23	3.2187e-22
ALDH1L1	protein_coding	248.234	1.39155	1.11426e-18	1.30693e-17
TIMP4	protein_coding	47.9951	1.39097	3.75739e-32	1.55398e-30
RAG1	protein_coding	163.411	1.38849	9.30667e-28	2.60042e-26
VIP	protein_coding	26.193	1.38329	6.30913e-43	6.82989e-41
GLRA2	protein_coding	1.25923	1.38318	2.72346e-08	1.11843e-07
AMELY	protein_coding	4.29088	1.38183	0.00269849	0.00565218
VSX1	protein_coding	20.8993	1.38182	1.76527e-17	1.86511e-16
NQO1	protein_coding	7416.81	1.37496	6.55613e-40	5.34486e-38
TMEM253	protein_coding	19.7794	1.37305	3.62959e-49	7.08415e-47
TSGA10IP	protein_coding	128.155	1.37119	2.58791e-23	4.7208e-22
ARHGAP24	protein_coding	1333.03	1.37069	2.7229e-42	2.7877e-40
AQP7	protein_coding	73.8792	1.36997	2.73353e-43	3.05946e-41
MAGEA12	protein_coding	0.867975	1.36686	2.11994e-05	6.08742e-05
NKX2-2	protein_coding	0.808384	1.3659	3.68698e-08	1.49063e-07
DIRAS2	protein_coding	124.232	1.36321	9.59457e-24	1.825e-22
TEDDM1	protein_coding	2.40315	1.36272	1.00536e-16	9.93354e-16
KCNB1	protein_coding	47.0123	1.36129	1.26397e-27	3.47293e-26
RBFOX1	protein_coding	183.15	1.36084	7.02616e-09	3.08541e-08
BMX	protein_coding	142.234	1.36003	8.4582e-33	3.67056e-31
NOL4	protein_coding	65.2237	1.35839	6.2318e-13	4.26075e-12
KCNG4	protein_coding	1.07905	1.3578	1.34935e-06	4.51618e-06
SORBS2	protein_coding	9329.56	1.3561	2.94883e-44	3.56206e-42
ARMC3	protein_coding	7.87213	1.35555	3.52463e-09	1.60093e-08
OCA2	protein_coding	192.69	1.35513	3.03449e-14	2.37749e-13
C1QTNF9B	protein_coding	10.467	1.35445	1.40313e-40	1.24093e-38
SLC4A1	protein_coding	9.15092	1.35267	1.08099e-15	9.66595e-15
RIMBP2	protein_coding	310.489	1.35243	5.62629e-29	1.74565e-27
CTXN3	protein_coding	1.0894	1.35101	1.23622e-05	3.66125e-05
FLT1	protein_coding	8807.15	1.3509	5.69244e-101	7.51801e-97
TG	protein_coding	2.08143e+06	1.35082	2.73647e-45	3.68781e-43
PDE10A	protein_coding	936.793	1.34954	2.61735e-45	3.53931e-43
CYP17A1	protein_coding	144.716	1.34809	1.64762e-30	5.8864e-29
HHIPL2	protein_coding	99.5746	1.34757	6.06327e-12	3.72512e-11
MLN	protein_coding	1.83298	1.3475	2.11648e-06	6.9132e-06
PGF	protein_coding	5298.6	1.34633	1.06922e-30	3.88302e-29
C1orf194	protein_coding	8.5718	1.34544	5.23638e-16	4.84292e-15
ATP1B2	protein_coding	953.513	1.34498	3.21914e-34	1.59233e-32
SLC35F1	protein_coding	142.691	1.34388	4.00653e-22	6.51921e-21
WNT11	protein_coding	117.328	1.34343	6.31966e-21	9.21572e-20
TMEM252	protein_coding	9.2591	1.33632	3.59987e-17	3.70084e-16
LIPF	protein_coding	2.80635	1.33551	8.98612e-07	3.07222e-06
SYT3	protein_coding	35.3936	1.33308	8.2728e-18	8.99744e-17
MT1M	protein_coding	282.76	1.33107	2.2039e-20	3.04254e-19
CKMT2	protein_coding	441.079	1.32945	2.46617e-31	9.51431e-30
MAPT	protein_coding	221.896	1.32944	7.61616e-26	1.7803e-24
INHBC	protein_coding	17.5743	1.32871	4.91182e-19	5.95688e-18
DGKI	protein_coding	1484.32	1.328	7.15337e-21	1.03515e-19
CACNA2D2	protein_coding	1000.01	1.32782	6.0753e-42	5.97294e-40
EMX1	protein_coding	2.75739	1.32742	5.68676e-12	3.5074e-11
LAMB4	protein_coding	19.0827	1.32613	3.48847e-27	9.18382e-26
GDF7	protein_coding	63.1135	1.32601	1.6476e-33	7.60832e-32
RADIL	protein_coding	102.035	1.32502	3.32013e-27	8.75229e-26
ENO3	protein_coding	886.028	1.32419	9.28593e-25	1.95182e-23
KBTBD13	protein_coding	0.70523	1.32411	3.17434e-10	1.61846e-09
LIPG	protein_coding	16425.8	1.32094	1.72853e-55	6.00755e-53
ECM1	protein_coding	11633.3	1.31913	3.63962e-12	2.29104e-11
ABCG2	protein_coding	782.836	1.31793	2.42252e-53	6.8217e-51
TCEAL6	protein_coding	5.47679	1.31708	1.02915e-15	9.21903e-15
FOXR1	protein_coding	1.62202	1.31626	3.15773e-10	1.61041e-09
PRKG1	protein_coding	787.128	1.31547	7.38609e-53	1.99078e-50
PASK	protein_coding	5182.14	1.31485	9.51363e-17	9.42584e-16
EMID1	protein_coding	1980.5	1.31408	1.64915e-27	4.47234e-26
ZNF648	protein_coding	3.11631	1.31156	3.7901e-09	1.716e-08
DCDC2C	protein_coding	0.713256	1.31048	6.86511e-06	2.10382e-05
ARSF	protein_coding	12.853	1.30975	4.37493e-06	1.37549e-05
ISL1	protein_coding	8.94424	1.30973	1.15042e-05	3.42429e-05
PIWIL2	protein_coding	61.2539	1.30903	4.62092e-33	2.04109e-31
PRIMA1	protein_coding	78.8189	1.30546	1.22102e-13	8.94899e-13
PCDH11X	protein_coding	7.89353	1.30175	8.5846e-09	3.73148e-08
CACNB4	protein_coding	221.072	1.2997	1.2799e-23	2.41021e-22
ABCC11	protein_coding	217.24	1.29925	2.49154e-13	1.77294e-12
HSD17B3	protein_coding	40.8301	1.29917	1.21694e-24	2.52311e-23
CFAP65	protein_coding	85.0392	1.2978	2.82296e-32	1.17983e-30
PPARGC1A	protein_coding	1539.85	1.29607	8.34893e-22	1.3179e-20
ASPA	protein_coding	71.4387	1.29588	8.0703e-41	7.28368e-39
CFAP74	protein_coding	32.0546	1.29444	1.12161e-41	1.07863e-39
KRT27	protein_coding	148.889	1.2937	2.81588e-23	5.11311e-22
ATRNL1	protein_coding	99.0452	1.29354	2.09554e-18	2.4052e-17
CLCNKB	protein_coding	482.191	1.29241	2.53612e-24	5.09553e-23
ELAVL3	protein_coding	7.37988	1.29045	8.30457e-16	7.51566e-15
SLC1A2	protein_coding	64.846	1.28999	8.981e-21	1.28833e-19
H4C4	protein_coding	6.29006	1.2897	2.89264e-27	7.68159e-26
ESM1	protein_coding	1279.51	1.28847	4.17298e-26	9.9721e-25
SLC25A15	protein_coding	672.869	1.28768	2.52051e-34	1.26411e-32
OGDHL	protein_coding	2136.49	1.28759	1.80008e-20	2.50777e-19
USH1C	protein_coding	44.8492	1.28695	5.7968e-11	3.20149e-10
MDGA2	protein_coding	2.78447	1.28514	8.99241e-09	3.89855e-08
FLT4	protein_coding	2097.91	1.28514	3.37993e-90	1.91309e-86
SCN4B	protein_coding	1077.43	1.28441	6.98828e-51	1.59128e-48
COLEC11	protein_coding	259.987	1.28423	2.02755e-28	5.99056e-27
GOLGA8S	protein_coding	8.5695	1.28396	1.73906e-30	6.17968e-29
MYH3	protein_coding	253.24	1.28185	8.16561e-36	4.56963e-34
TMEM88	protein_coding	515.208	1.28185	3.93142e-56	1.41606e-53
AQP4	protein_coding	1267.67	1.28017	2.31038e-19	2.90141e-18
KDR	protein_coding	5823.55	1.27999	3.48773e-72	4.93527e-69
BEX1	protein_coding	589.68	1.27989	1.56237e-17	1.65826e-16
SLC27A4	protein_coding	2781.33	1.27974	6.10977e-38	4.11692e-36
SLC6A1	protein_coding	142.285	1.27822	1.41415e-27	3.86148e-26
GNRH2	protein_coding	9.67344	1.27714	3.81287e-38	2.60915e-36
CHRM3	protein_coding	364.661	1.27706	2.02441e-41	1.9052e-39
ELOA2	protein_coding	1.37722	1.27661	2.27713e-11	1.31884e-10
NPPB	protein_coding	0.918757	1.27625	1.27005e-07	4.81447e-07
CNTN2	protein_coding	18.4304	1.2746	1.83393e-21	2.79685e-20
MLNR	protein_coding	6.9094	1.27366	3.34725e-12	2.11585e-11
H2BC4	protein_coding	133.155	1.27323	2.30148e-42	2.39335e-40
SELENOV	protein_coding	152.445	1.27267	4.21694e-10	2.11895e-09
MAOB	protein_coding	518.631	1.27237	8.13286e-21	1.17048e-19
DLGAP2	protein_coding	83.3687	1.26837	1.08637e-15	9.71191e-15
OR1R1P	protein_coding	0.59202	1.26266	0.00208448	0.00444481
THSD7B	protein_coding	106.271	1.26247	2.70432e-38	1.90994e-36
CA12	protein_coding	5311.54	1.25649	2.05244e-15	1.79316e-14
GPIHBP1	protein_coding	199.175	1.25573	3.1304e-42	3.18842e-40
TMSB15A	protein_coding	46.0017	1.25202	5.21757e-31	1.95578e-29
CTCFL	protein_coding	3.75333	1.24879	5.60932e-16	5.16133e-15
ZNF723	protein_coding	1.29823	1.24818	8.18109e-08	3.17321e-07
SLC22A10	protein_coding	0.711286	1.24737	4.39568e-07	1.55891e-06
SOD3	protein_coding	4137.29	1.24699	2.97886e-22	4.91159e-21
TEKT1	protein_coding	6.60373	1.2428	2.19892e-10	1.13976e-09
GOLGA6L7	protein_coding	3.40052	1.24247	2.15362e-07	7.93904e-07
PRR18	protein_coding	15.4199	1.24085	3.11258e-19	3.85386e-18
NTN3	protein_coding	5.08333	1.23985	3.97997e-17	4.07469e-16
CTNND2	protein_coding	55.6143	1.23935	1.29216e-11	7.68111e-11
SH3GL2	protein_coding	137.915	1.23834	7.32204e-10	3.59577e-09
GPAM	protein_coding	2033.12	1.23821	8.53126e-41	7.64744e-39
DNASE1L3	protein_coding	424.782	1.23786	5.24069e-28	1.49382e-26
ST6GAL1	protein_coding	8213.91	1.23768	1.70397e-23	3.15925e-22
PTPRQ	protein_coding	90.3119	1.23691	3.88676e-12	2.43667e-11
LECT2	protein_coding	0.640789	1.23492	6.97499e-06	2.13452e-05
TUBA4B	protein_coding	16.3003	1.23344	3.59594e-13	2.51544e-12
LIFR	protein_coding	2483.22	1.23305	2.66776e-32	1.11851e-30
TBX5	protein_coding	33.538	1.23265	2.49193e-07	9.10903e-07
GLRA1	protein_coding	4.33822	1.23166	3.26236e-05	9.13483e-05
KATNAL2	protein_coding	466.076	1.23087	3.30142e-42	3.35398e-40
IQGAP2	protein_coding	2761.8	1.23065	7.4229e-27	1.89402e-25
FAM171B	protein_coding	471.08	1.23041	1.696e-31	6.6335e-30
BEGAIN	protein_coding	47.6141	1.23029	4.71048e-45	6.22114e-43
KY	protein_coding	189.221	1.22891	5.24721e-35	2.76462e-33
ADRA2B	protein_coding	76.7175	1.22786	3.20047e-43	3.53219e-41
RGCC	protein_coding	3562.85	1.22731	1.38326e-64	1.05396e-61
PDK4	protein_coding	24826	1.22391	1.11814e-20	1.58618e-19
AL627230.1	protein_coding	0.496251	1.22354	9.67148e-07	3.29346e-06
CDH2	protein_coding	4076.68	1.22282	1.02058e-20	1.45403e-19
GOLGA8T	protein_coding	5.4619	1.22212	1.37606e-22	2.34498e-21
DNAI2	protein_coding	6.11326	1.22206	9.92294e-27	2.50418e-25
C16orf89	protein_coding	18617.8	1.22036	4.77401e-31	1.79973e-29
TDGF1	protein_coding	28.5874	1.21996	2.00572e-16	1.92885e-15
NKX2-3	protein_coding	39.4097	1.21931	4.72828e-08	1.88812e-07
DCLK3	protein_coding	56.9361	1.21899	1.7878e-35	9.75683e-34
TRPM5	protein_coding	40.3383	1.21888	4.11003e-22	6.68487e-21
RERGL	protein_coding	47.9755	1.21726	5.78271e-15	4.84281e-14
HIGD2B	protein_coding	1.98247	1.21635	1.78727e-12	1.167e-11
RYR2	protein_coding	404.942	1.21571	1.07643e-15	9.62734e-15
CHRNA7	protein_coding	51.9755	1.21356	1.92202e-26	4.72117e-25
CBLL2	protein_coding	0.615925	1.21281	0.000139421	0.000357031
RIMKLA	protein_coding	117.136	1.21192	3.4676e-28	1.00726e-26
BPIFB2	protein_coding	2.79133	1.21097	2.58144e-07	9.41709e-07
FBXW10	protein_coding	12.8405	1.21089	2.81014e-21	4.22064e-20
RSPO1	protein_coding	97.1688	1.20926	4.44579e-05	0.000122214
DEFA5	protein_coding	0.495994	1.20805	0.00202239	0.00432406
NCAN	protein_coding	9.5335	1.20682	8.37523e-27	2.12306e-25
TSPAN18	protein_coding	3417.26	1.20556	2.72071e-29	8.65148e-28
RIMS4	protein_coding	613.224	1.20514	3.2382e-16	3.05333e-15
SH2D4B	protein_coding	10.2913	1.20319	1.54404e-23	2.8816e-22
CNTNAP2	protein_coding	81.207	1.20312	1.78841e-14	1.4341e-13
NRSN1	protein_coding	46.3888	1.20295	1.31865e-10	6.9932e-10
KCNC1	protein_coding	10.1009	1.20122	3.58747e-22	5.87109e-21
SP6	protein_coding	117.717	1.20089	2.56686e-29	8.20836e-28
ZDHHC22	protein_coding	4.61636	1.20074	1.94403e-12	1.26435e-11
DGKB	protein_coding	13.0587	1.19951	3.13987e-35	1.68342e-33
PPP2R2C	protein_coding	33.1068	1.1994	7.03994e-11	3.84731e-10
MAFA	protein_coding	27.0653	1.19826	3.60523e-13	2.5215e-12
ANGPT4	protein_coding	119.685	1.19795	5.82901e-26	1.37717e-24
LOXHD1	protein_coding	16.7395	1.19735	1.2524e-24	2.58941e-23
LRRC70	protein_coding	73.2914	1.197	6.15911e-62	3.53667e-59
GATA5	protein_coding	185.094	1.19695	5.67689e-06	1.75938e-05
MAPK4	protein_coding	337.15	1.19691	1.44946e-11	8.57408e-11
PDGFD	protein_coding	1784.29	1.19604	1.32521e-86	5.25061e-83
SLC5A1	protein_coding	19.6132	1.19495	1.5727e-09	7.4243e-09
BRSK2	protein_coding	56.0818	1.19469	2.84325e-31	1.09159e-29
ZP1	protein_coding	9.51775	1.19441	7.27817e-16	6.63373e-15
DIO2	protein_coding	16153.9	1.19289	1.19233e-25	2.72755e-24
PBX3	protein_coding	10909.2	1.19197	1.14194e-33	5.34176e-32
TSNAXIP1	protein_coding	46.2356	1.1915	3.55526e-32	1.475e-30
ABCA8	protein_coding	854.013	1.19118	3.2237e-33	1.44161e-31
SEC14L3	protein_coding	9.1857	1.18574	1.13893e-07	4.34316e-07
CORO2B	protein_coding	369.632	1.18185	1.50491e-35	8.23565e-34
MYT1L	protein_coding	2.88488	1.18153	9.81504e-10	4.74015e-09
TAL1	protein_coding	260.839	1.17936	3.40499e-73	5.18881e-70
GPR17	protein_coding	22.2308	1.17856	1.68659e-31	6.60319e-30
RXFP1	protein_coding	45.2556	1.17815	2.15107e-21	3.25918e-20
HTR1E	protein_coding	9.06303	1.17796	4.87324e-09	2.18049e-08
VEGFA	protein_coding	23129.6	1.17777	8.17716e-88	3.59986e-84
FCGBP	protein_coding	33607.3	1.17676	4.25126e-31	1.60878e-29
GOLGA8N	protein_coding	310.582	1.17511	3.77403e-48	6.64581e-46
C6orf118	protein_coding	4.27654	1.17498	5.29112e-12	3.27357e-11
KIF5A	protein_coding	349.149	1.17256	2.95782e-13	2.08415e-12
IGDCC4	protein_coding	1486.75	1.1723	1.55447e-40	1.36866e-38
SLC38A11	protein_coding	147.291	1.17162	2.47627e-36	1.44071e-34
CA2	protein_coding	759.181	1.1715	1.57383e-47	2.5982e-45
KCNK2	protein_coding	361.64	1.16932	9.98207e-17	9.86775e-16
GOLGA8K	protein_coding	14.4808	1.16916	1.47225e-26	3.6526e-25
SLC26A8	protein_coding	117.456	1.16914	1.37136e-21	2.11666e-20
FAM162B	protein_coding	90.935	1.16888	1.18821e-39	9.5493e-38
DEFB131A	protein_coding	18.2592	1.16825	4.49119e-21	6.63975e-20
AR	protein_coding	685.393	1.16813	5.84643e-24	1.13717e-22
NEXMIF	protein_coding	72.4622	1.16522	5.1838e-25	1.11623e-23
SULT1A2	protein_coding	307.23	1.16354	1.84694e-30	6.55126e-29
VN1R2	protein_coding	0.61799	1.16146	1.60047e-08	6.74169e-08
CFAP161	protein_coding	21.6421	1.16087	1.75813e-22	2.95917e-21
TFF3	protein_coding	5019.6	1.16053	4.74493e-08	1.89458e-07
PLIN1	protein_coding	74.5974	1.16006	2.69713e-19	3.36895e-18
SUSD5	protein_coding	423.745	1.15996	5.00608e-31	1.88006e-29
SCUBE3	protein_coding	4069.52	1.15956	1.10676e-27	3.06221e-26
OLFM4	protein_coding	23.8143	1.1581	5.35716e-09	2.38705e-08
RGS5	protein_coding	27695.1	1.15626	4.6185e-50	9.78555e-48
H3C10	protein_coding	71.1781	1.15517	3.22737e-27	8.52476e-26
FAM166A	protein_coding	5.78481	1.15497	5.76346e-18	6.34493e-17
RNASE13	protein_coding	3.51234	1.15468	8.29529e-17	8.25798e-16
LRRC3B	protein_coding	4.79922	1.15423	6.84422e-17	6.8704e-16
H1-2	protein_coding	4211.28	1.15318	2.78158e-29	8.83792e-28
HAP1	protein_coding	146.591	1.15312	1.06695e-16	1.05237e-15
SPINK14	protein_coding	1.62906	1.15192	5.50561e-06	1.70927e-05
SLC16A2	protein_coding	2089.25	1.1511	6.61986e-34	3.17153e-32
GSTM3	protein_coding	2987.33	1.15081	1.83673e-30	6.52087e-29
PLA2G3	protein_coding	72.4833	1.15062	1.72188e-13	1.24403e-12
FHL5	protein_coding	155.557	1.14962	1.8567e-31	7.22637e-30
ELOVL2	protein_coding	137.073	1.14956	7.32451e-33	3.19961e-31
RNF157	protein_coding	345.482	1.14938	1.37799e-19	1.76634e-18
CTRC	protein_coding	21.8496	1.14868	1.66557e-11	9.78085e-11
CAVIN2	protein_coding	4685.39	1.14846	4.61569e-38	3.14764e-36
PDE8B	protein_coding	15030.4	1.14823	3.52544e-40	3.02341e-38
GPR42	protein_coding	1.16434	1.148	9.24109e-07	3.15367e-06
TM4SF18	protein_coding	1027.13	1.148	1.86696e-68	1.9466e-65
EFCC1	protein_coding	228.603	1.14684	4.03105e-40	3.42734e-38
HS6ST3	protein_coding	256.485	1.14388	2.2918e-12	1.47648e-11
GRM3	protein_coding	7.39448	1.14384	1.14629e-13	8.42464e-13
TMC3	protein_coding	80.5592	1.14373	2.69227e-21	4.04822e-20
OR2T33	protein_coding	2.361	1.14207	5.23395e-11	2.91092e-10
ANGPTL1	protein_coding	1146.23	1.14144	2.26066e-33	1.02953e-31
MORN5	protein_coding	1.9172	1.14075	1.78789e-08	7.48973e-08
LPA	protein_coding	4.65606	1.14003	1.62215e-08	6.82647e-08
PHGR1	protein_coding	0.970878	1.13924	5.01645e-07	1.76767e-06
OR14A16	protein_coding	0.363771	1.13912	0.000582935	0.00135966
GABRD	protein_coding	486.589	1.13867	1.93219e-32	8.20527e-31
C1QTNF9	protein_coding	8.14247	1.1383	1.2859e-22	2.19796e-21
FGF21	protein_coding	0.984168	1.13815	0.0098984	0.0186657
HELT	protein_coding	0.411587	1.13763	0.00519221	0.0103128
FOXP2	protein_coding	380.037	1.13674	4.604e-19	5.59384e-18
AOX1	protein_coding	290.879	1.13598	4.04593e-12	2.53044e-11
HSD17B6	protein_coding	1763.28	1.13444	1.0241e-16	1.01161e-15
CYP46A1	protein_coding	98.6593	1.13383	2.1092e-44	2.61152e-42
SLC30A8	protein_coding	40.7048	1.13366	1.02365e-05	3.06768e-05
LHCGR	protein_coding	19.072	1.1318	9.97451e-10	4.81013e-09
SSX3	protein_coding	6.0924	1.13163	9.42423e-12	5.67473e-11
PEAR1	protein_coding	563.516	1.13105	9.69303e-75	1.8288e-71
LIX1	protein_coding	596.784	1.13072	4.78844e-10	2.39519e-09
ANTXRL	protein_coding	5.92782	1.1307	9.17123e-11	4.94722e-10
THBS4	protein_coding	1667.54	1.12986	1.60165e-11	9.41945e-11
RFX8	protein_coding	51.1674	1.12972	2.40516e-42	2.49463e-40
SYNE1	protein_coding	5693.99	1.12945	1.35854e-44	1.71971e-42
TSPAN7	protein_coding	1891.23	1.12724	1.54946e-37	1.01641e-35
GGTLC1	protein_coding	76.1103	1.12722	3.36687e-25	7.38642e-24
ADCYAP1R1	protein_coding	252.967	1.12684	1.07187e-11	6.41712e-11
TRPC4	protein_coding	75.5671	1.12629	3.78985e-53	1.05005e-50
MYL7	protein_coding	1.18775	1.12343	2.07111e-05	5.9541e-05
PLA2G4F	protein_coding	378.024	1.12259	3.51093e-15	2.9967e-14
TNP1	protein_coding	1.87625	1.12231	3.58877e-06	1.14035e-05
ENPEP	protein_coding	689.375	1.12158	1.59644e-45	2.2272e-43
RBM20	protein_coding	127.744	1.12089	6.5635e-31	2.43495e-29
ONECUT2	protein_coding	18.099	1.12015	3.66078e-23	6.55417e-22
LRGUK	protein_coding	25.5498	1.12006	6.39049e-32	2.58629e-30
ODAM	protein_coding	39.548	1.11804	0.000114	0.000295833
F11	protein_coding	0.878905	1.11779	1.40624e-05	4.13175e-05
SHANK2	protein_coding	1050.26	1.11713	3.04789e-40	2.62523e-38
MT1HL1	protein_coding	2.84094	1.11497	3.33632e-06	1.06449e-05
SALL4	protein_coding	128.995	1.11481	5.18678e-23	9.158e-22
PPP1R42	protein_coding	26.2516	1.11427	1.77801e-33	8.17245e-32
RCAN2	protein_coding	1426.67	1.11361	2.94107e-36	1.69619e-34
PLVAP	protein_coding	25654.9	1.11328	6.23455e-49	1.17628e-46
BRS3	protein_coding	1.45421	1.11155	0.000102735	0.000268183
APOLD1	protein_coding	6421.34	1.1109	6.63301e-35	3.45798e-33
LDHD	protein_coding	868.663	1.11049	9.56745e-26	2.21809e-24
VWA3A	protein_coding	15.5749	1.11041	6.65096e-14	5.02609e-13
TMEM178B	protein_coding	2620.54	1.11028	7.9256e-22	1.25458e-20
DPY19L2	protein_coding	508.554	1.10982	2.93289e-30	1.02835e-28
ATOH7	protein_coding	5.30803	1.10972	1.39205e-16	1.35915e-15
ALPI	protein_coding	0.433814	1.10807	0.0286182	0.0490433
ANKRD30A	protein_coding	1.34424	1.10589	5.48808e-09	2.44236e-08
MUC3A	protein_coding	128.261	1.10564	5.03932e-28	1.43849e-26
ANKRD18B	protein_coding	9.32975	1.10536	1.0782e-12	7.19421e-12
COL11A2	protein_coding	544.549	1.10455	5.64822e-13	3.87915e-12
C1orf185	protein_coding	0.382593	1.10437	0.000592347	0.0013799
SPARCL1	protein_coding	15354.9	1.10364	4.65934e-55	1.51318e-52
ANO2	protein_coding	67.8047	1.10295	6.72967e-41	6.12957e-39
PPM1L	protein_coding	1824.42	1.09696	1.55766e-33	7.20143e-32
CNNM1	protein_coding	14.8341	1.0969	4.51616e-11	2.52911e-10
LRRTM4	protein_coding	2.7888	1.09654	0.000355948	0.00085743
NPR3	protein_coding	1446.89	1.09481	5.32648e-14	4.06081e-13
CFAP299	protein_coding	7.19863	1.09425	2.86022e-19	3.55808e-18
H2AC17	protein_coding	14.8293	1.09412	6.86352e-25	1.4644e-23
SYNM	protein_coding	873.043	1.09365	1.11683e-53	3.25368e-51
EBF2	protein_coding	363.154	1.09282	7.24691e-37	4.48641e-35
NOTCH4	protein_coding	2906.11	1.09258	7.65273e-91	5.05348e-87
RNF150	protein_coding	664.608	1.09196	3.07967e-25	6.77511e-24
CDH8	protein_coding	34.909	1.09176	9.82736e-21	1.40212e-19
AKR1C2	protein_coding	97.9048	1.0908	3.3261e-16	3.13173e-15
UPB1	protein_coding	12.7656	1.09043	3.02053e-30	1.05628e-28
EYA4	protein_coding	189.046	1.09027	3.1354e-10	1.59943e-09
CGNL1	protein_coding	6333.57	1.09011	4.59428e-31	1.73362e-29
SAMD5	protein_coding	234.205	1.08983	6.91904e-16	6.3224e-15
PHOX2A	protein_coding	0.64824	1.08845	7.68899e-07	2.64909e-06
ENDOU	protein_coding	46.085	1.08749	8.70725e-32	3.47422e-30
EMCN	protein_coding	1984.13	1.08647	7.74612e-59	3.3001e-56
QPRT	protein_coding	1156.53	1.08623	1.7464e-14	1.40182e-13
ADD2	protein_coding	167.319	1.08493	3.7985e-15	3.2317e-14
PCP4L1	protein_coding	95.6573	1.08441	1.64862e-12	1.08074e-11
DOK6	protein_coding	150.75	1.08276	4.32816e-27	1.1303e-25
COL28A1	protein_coding	64.5515	1.08269	2.89686e-24	5.79095e-23
PLEKHG4B	protein_coding	437.056	1.08262	9.31066e-14	6.90174e-13
PVALEF	protein_coding	1.39731	1.08108	9.63152e-09	4.16196e-08
KRT28	protein_coding	0.505277	1.08092	0.00285885	0.00596137
TLX1	protein_coding	2.70065	1.07948	6.1906e-09	2.73706e-08
EDA	protein_coding	1182.72	1.07934	9.33316e-21	1.33498e-19
VAV3	protein_coding	1752.79	1.07878	4.19619e-27	1.09958e-25
ROBO4	protein_coding	2544.99	1.0786	2.19219e-63	1.55101e-60
CFAP77	protein_coding	6.84381	1.07707	6.2408e-17	6.29979e-16
C9orf153	protein_coding	5.28327	1.07466	1.6923e-27	4.58309e-26
SLCO2A1	protein_coding	7742.56	1.07346	1.75067e-61	8.89271e-59
HIGD1B	protein_coding	212.85	1.0733	7.92124e-34	3.76316e-32
SCN4A	protein_coding	1126.11	1.07269	2.24991e-27	6.03546e-26
KCNIP3	protein_coding	2169.59	1.07169	9.74949e-30	3.25704e-28
HRC	protein_coding	172.355	1.07115	9.34183e-34	4.41256e-32
MROH7-TTC4	protein_coding	15.3398	1.07108	1.40846e-21	2.17138e-20
ST3GAL6	protein_coding	589.449	1.07079	1.60156e-28	4.78547e-27
PIP	protein_coding	9.62166	1.0706	7.20122e-05	0.000191992
RAPGEF4	protein_coding	649.158	1.06891	1.79125e-62	1.12652e-59
SLC35F3	protein_coding	259.259	1.06809	1.05593e-17	1.13687e-16
APOL5	protein_coding	6.13623	1.06624	6.82215e-21	9.91201e-20
SLCO1B1	protein_coding	0.549059	1.06622	0.010505	0.0197045
ZSCAN1	protein_coding	142.288	1.06618	5.47164e-33	2.4088e-31
SPAAR	protein_coding	80.0636	1.06568	9.21514e-60	4.05681e-57
PROX1	protein_coding	529.422	1.06497	8.80921e-28	2.4649e-26
GLDN	protein_coding	1058.95	1.06434	3.18799e-07	1.14912e-06
ADGRG3	protein_coding	43.2776	1.063	7.10333e-16	6.48481e-15
DLG2	protein_coding	597.396	1.0622	2.3415e-16	2.23548e-15
SDK2	protein_coding	321.697	1.06096	5.38751e-19	6.5059e-18
MYT1	protein_coding	122.427	1.05969	7.02364e-32	2.83096e-30
PDE1B	protein_coding	395.452	1.05755	1.4688e-36	8.76436e-35
SLC14A1	protein_coding	364.847	1.05602	6.17419e-17	6.23732e-16
MAGEL2	protein_coding	78.3595	1.0552	8.96843e-14	6.66176e-13
CPXM1	protein_coding	1506.51	1.05391	5.87898e-11	3.24326e-10
RANBP3L	protein_coding	95.7601	1.05385	3.52201e-21	5.24607e-20
ECEL1	protein_coding	173.983	1.05362	1.55445e-13	1.12759e-12
PREX2	protein_coding	818.248	1.05308	3.69664e-35	1.97392e-33
SYN3	protein_coding	19.2833	1.05256	1.19928e-36	7.28785e-35
ARHGAP19-SLIT1	protein_coding	13.2735	1.05223	7.69145e-11	4.19006e-10
IP6K3	protein_coding	398.042	1.05192	9.98969e-15	8.17771e-14
DNAAF6	protein_coding	2.54538	1.05176	7.03396e-10	3.46288e-09
SLC39A12	protein_coding	7.48448	1.05105	5.61294e-10	2.79315e-09
TRIM58	protein_coding	544.631	1.05037	4.18715e-19	5.10459e-18
CTNNA3	protein_coding	14.6082	1.04927	2.00353e-18	2.30226e-17
GNAI1	protein_coding	1400.61	1.04774	7.98553e-45	1.0306e-42
SULT1C4	protein_coding	104.757	1.04745	3.91846e-34	1.90729e-32
GPR21	protein_coding	1.12165	1.0466	7.08487e-10	3.48664e-09
ITGA10	protein_coding	298.057	1.04656	7.65575e-50	1.59647e-47
COX4I2	protein_coding	440.669	1.04484	2.18372e-25	4.86894e-24
TTC34	protein_coding	101.647	1.04338	1.36316e-38	9.92829e-37
ESRRG	protein_coding	357.963	1.04192	3.11488e-33	1.39926e-31
COL23A1	protein_coding	3240.11	1.04192	9.42933e-16	8.48511e-15
GRIA4	protein_coding	5.88465	1.04151	9.11944e-15	7.48542e-14
GLRA4	protein_coding	0.944203	1.04074	0.00012234	0.000315761
SYT15	protein_coding	20.7744	1.03984	6.02363e-25	1.29216e-23
TRPC6	protein_coding	742.875	1.03831	2.22586e-45	3.04107e-43
PFKFB1	protein_coding	18.1817	1.0372	8.11255e-24	1.55129e-22
DAND5	protein_coding	18.3757	1.03704	1.36213e-13	9.93541e-13
AC092718.3	protein_coding	69.0571	1.03692	1.86935e-50	4.09202e-48
BFSP1	protein_coding	262.73	1.03668	3.43021e-37	2.19207e-35
RTL9	protein_coding	31.8917	1.03642	1.87922e-17	1.98128e-16
TMEM204	protein_coding	2042.43	1.03622	1.48108e-61	7.92998e-59
WFIKKN1	protein_coding	38.021	1.03298	3.21294e-23	5.79601e-22
ERBB4	protein_coding	440.077	1.03277	2.22885e-20	3.0759e-19
PLCD4	protein_coding	285.815	1.0311	1.3787e-36	8.2766e-35
DEPTOR	protein_coding	3409.92	1.03064	2.47336e-30	8.71086e-29
MTARC1	protein_coding	3160.2	1.02982	1.54773e-45	2.1823e-43
ST8SIA5	protein_coding	32.0496	1.02838	3.27473e-11	1.86072e-10
PDE2A	protein_coding	1022.18	1.02715	3.03216e-51	7.32544e-49
PDZD3	protein_coding	4.98702	1.02713	5.33786e-15	4.48741e-14
TBXA2R	protein_coding	284.66	1.02622	4.13087e-45	5.47389e-43
SLC6A4	protein_coding	24.2922	1.026	5.35944e-25	1.15218e-23
MFAP3L	protein_coding	293.289	1.0246	3.28424e-20	4.45786e-19
EFHC2	protein_coding	147.303	1.02426	6.57196e-24	1.26709e-22
ADGRG4	protein_coding	0.722443	1.02258	4.52698e-06	1.42093e-05
OLFM2	protein_coding	866.311	1.02149	8.66528e-17	8.60685e-16
HMCN2	protein_coding	272.593	1.0207	2.75664e-19	3.43894e-18
GGTLC2	protein_coding	29.0255	1.02043	1.62343e-12	1.06476e-11
GALNT9	protein_coding	457.49	1.02042	6.91429e-14	5.21315e-13
UNC5D	protein_coding	112.545	1.01914	1.64516e-08	6.91521e-08
LRP2	protein_coding	7309.39	1.01858	2.1922e-18	2.51032e-17
USHBP1	protein_coding	334.418	1.01852	3.42291e-61	1.67431e-58
CCL14	protein_coding	82.6831	1.01832	1.95011e-22	3.26426e-21
COLEC10	protein_coding	33.4847	1.01757	8.55994e-19	1.01543e-17
FO681492.1	protein_coding	16.4309	1.01484	1.13099e-21	1.76075e-20
SLIT1	protein_coding	5562.45	1.01461	4.1442e-09	1.86949e-08
GIPC3	protein_coding	530.457	1.01442	6.99145e-49	1.30664e-46
MYCT1	protein_coding	825.359	1.01356	1.74815e-61	8.89271e-59
SNAP91	protein_coding	46.7726	1.01335	9.15744e-09	3.96836e-08
UGT8	protein_coding	438.527	1.0124	4.13717e-19	5.04988e-18
ACOT6	protein_coding	1.61118	1.01229	7.50965e-09	3.28773e-08
OTOGL	protein_coding	16.3686	1.01207	6.75839e-14	5.10337e-13
IFNA8	protein_coding	0.896121	1.01195	0.000111229	0.00028908
AKR1E2	protein_coding	54.3618	1.01069	4.62123e-25	1.00053e-23
FER1L5	protein_coding	23.1045	1.01031	1.1579e-27	3.19478e-26
MYL4	protein_coding	1056.62	1.00954	5.36372e-15	4.50819e-14
CFAP99	protein_coding	38.6724	1.00893	2.89358e-38	2.02556e-36
FGFBP2	protein_coding	19.4561	1.00855	1.5113e-18	1.75547e-17
SLC43A1	protein_coding	653.73	1.0082	1.9448e-25	4.36819e-24
NPAP1	protein_coding	26.546	1.00662	2.49684e-10	1.2856e-09
ATP2C2	protein_coding	297.909	1.00657	1.19266e-15	1.06261e-14
RTP3	protein_coding	4.32028	1.006	3.20187e-10	1.63124e-09
GAL3ST2	protein_coding	4.93261	1.00415	5.29412e-10	2.64046e-09
KIF6	protein_coding	99.867	1.003	4.48318e-32	1.84453e-30
CTXND1	protein_coding	2394.87	1.00092	7.30416e-11	3.98456e-10
TTYH2	protein_coding	1043.58	1.00069	8.77304e-36	4.90263e-34
LY6K	protein_coding	15.0837	1.00036	9.70381e-16	8.71627e-15
OR2I1P	protein_coding	66.6202	-1.00253	1.26627e-05	3.74577e-05
FCGR2B	protein_coding	297.028	-1.00278	3.58566e-19	4.40383e-18
SLC27A6	protein_coding	4298.15	-1.00507	4.06759e-08	1.63749e-07
LHFPL5	protein_coding	1.80783	-1.00593	2.12901e-08	8.8486e-08
CFHR1	protein_coding	1.83649	-1.00749	0.000139813	0.000357965
CDH17	protein_coding	17.8993	-1.00935	3.67743e-19	4.50676e-18
OLAH	protein_coding	126.99	-1.00986	9.55993e-14	7.07592e-13
KCNK6	protein_coding	544.67	-1.01086	5.28819e-40	4.41102e-38
TRIM10	protein_coding	1.11558	-1.01131	5.60227e-07	1.9624e-06
TNFRSF13B	protein_coding	36.5416	-1.01161	7.58833e-06	2.31293e-05
PDE4C	protein_coding	1261.16	-1.0125	1.09665e-18	1.28666e-17
CHI3L2	protein_coding	1766.01	-1.01254	6.03052e-27	1.55052e-25
CYSRT1	protein_coding	299.413	-1.01312	1.93252e-28	5.72689e-27
TGFB2	protein_coding	979.885	-1.01433	1.41055e-21	2.17376e-20
SLA2	protein_coding	117.434	-1.01522	4.54776e-15	3.84358e-14
HACD1	protein_coding	689.138	-1.01545	6.43613e-37	3.99696e-35
CLEC2B	protein_coding	653.527	-1.01564	3.66341e-44	4.38513e-42
PSTPIP2	protein_coding	301.612	-1.01577	1.77284e-40	1.55402e-38
IGSF6	protein_coding	630.541	-1.01581	1.62238e-25	3.67525e-24
ARHGDIG	protein_coding	9.47213	-1.01632	4.89904e-11	2.73271e-10
CLDN14	protein_coding	5.67323	-1.01654	8.19598e-10	4.00065e-09
SPI1	protein_coding	1149.45	-1.01656	7.67944e-27	1.95419e-25
SCD	protein_coding	1839.43	-1.01844	1.64529e-23	3.0576e-22
SLAMF8	protein_coding	588.384	-1.01858	2.19761e-16	2.10725e-15
NEK6	protein_coding	1148.36	-1.02063	6.34901e-34	3.05655e-32
NTRK1	protein_coding	9.79934	-1.02074	3.91301e-12	2.45196e-11
CYBB	protein_coding	1916.78	-1.02085	5.19378e-22	8.37196e-21
CREB3L3	protein_coding	2.02322	-1.02102	4.10659e-10	2.06612e-09
CPNE9	protein_coding	7.13027	-1.02216	6.65563e-18	7.30074e-17
CKLF	protein_coding	691.616	-1.02325	2.08179e-55	7.11058e-53
TMPRSS2	protein_coding	1790.81	-1.02349	4.15761e-19	5.07326e-18
MATN3	protein_coding	124.899	-1.02386	2.46738e-17	2.57806e-16
HSPA6	protein_coding	191.94	-1.02429	3.01167e-17	3.11635e-16
CR1L	protein_coding	6.56218	-1.0247	6.92937e-10	3.41351e-09
SIT1	protein_coding	111.522	-1.02535	1.98882e-12	1.292e-11
C3orf80	protein_coding	56.2286	-1.02538	7.68751e-22	1.21981e-20
SYT8	protein_coding	39.7444	-1.02545	6.93479e-08	2.71398e-07
PRTN3	protein_coding	26.8501	-1.02571	3.61724e-15	3.08212e-14
NPTX1	protein_coding	20.2187	-1.02596	1.00073e-09	4.82537e-09
ADAM8	protein_coding	506.008	-1.02643	1.16683e-28	3.5264e-27
GZMB	protein_coding	133.723	-1.02652	1.53007e-14	1.23393e-13
PTPRO	protein_coding	140.394	-1.0272	5.98074e-24	1.16158e-22
SCG2	protein_coding	71.3307	-1.0279	3.38185e-15	2.89275e-14
XPNPEP2	protein_coding	26.4539	-1.02798	1.58442e-11	9.32924e-11
STRA6	protein_coding	1897.7	-1.02865	5.83694e-11	3.22231e-10
GPR153	protein_coding	430.73	-1.02968	2.31153e-27	6.19236e-26
PTGS2	protein_coding	833.652	-1.03132	9.98229e-15	8.17334e-14
NPC1L1	protein_coding	3.85864	-1.03152	2.21351e-15	1.92286e-14
HRH1	protein_coding	875.833	-1.03207	8.11576e-26	1.89484e-24
IL1RAPL2	protein_coding	8.29106	-1.03369	2.12558e-06	6.94062e-06
LYPD1	protein_coding	91.1141	-1.03438	2.42077e-14	1.91482e-13
CDH20	protein_coding	35.4516	-1.03449	4.16226e-11	2.33753e-10
LGR5	protein_coding	25.9295	-1.03546	9.74211e-07	3.31608e-06
PYDC1	protein_coding	7.21507	-1.03593	2.98607e-10	1.5262e-09
ERVV-1	protein_coding	7.63876	-1.03702	1.50779e-05	4.41049e-05
DST	protein_coding	6350.91	-1.03703	5.85108e-34	2.82027e-32
CEACAM4	protein_coding	16.7301	-1.03887	8.10543e-14	6.0582e-13
CST7	protein_coding	291.79	-1.039	5.2225e-16	4.83121e-15
CYP4F22	protein_coding	9.52717	-1.03901	6.76763e-18	7.41743e-17
SPINK7	protein_coding	3.64099	-1.03998	1.026e-10	5.50157e-10
IL12B	protein_coding	8.61572	-1.04046	2.1698e-08	9.0134e-08
LGALS3	protein_coding	23642.3	-1.04137	9.94585e-26	2.30178e-24
MLPH	protein_coding	4054.38	-1.04143	2.31991e-28	6.82384e-27
RNF175	protein_coding	76.3764	-1.04158	3.04764e-22	5.02081e-21
TCL1A	protein_coding	45.9542	-1.04176	4.49555e-05	0.000123462
SPOCK3	protein_coding	51.6063	-1.04236	1.13065e-05	3.36901e-05
CD164L2	protein_coding	282.301	-1.04263	1.36086e-14	1.10196e-13
SPACA3	protein_coding	0.677846	-1.04273	0.000230645	0.00057147
SH2D5	protein_coding	138.53	-1.04452	1.66712e-29	5.43647e-28
NYAP2	protein_coding	40.5256	-1.04514	6.07277e-05	0.000163702
DCN	protein_coding	6826.22	-1.04548	5.43553e-11	3.01415e-10
MILR1	protein_coding	312.074	-1.04558	5.16778e-26	1.22753e-24
XCL2	protein_coding	28.1778	-1.0456	1.90555e-12	1.24055e-11
C1orf61	protein_coding	4.78663	-1.0466	1.46729e-11	8.67303e-11
C1R	protein_coding	4941.54	-1.04722	1.78359e-17	1.88296e-16
GRM5	protein_coding	1.25328	-1.04774	9.92777e-08	3.81225e-07
SLC7A4	protein_coding	53.5804	-1.04785	4.33187e-16	4.03892e-15
ARSL	protein_coding	42.3746	-1.04793	4.42506e-20	5.93117e-19
ARSJ	protein_coding	304.655	-1.04838	1.9709e-19	2.49406e-18
TMEM176B	protein_coding	2337.6	-1.04846	1.42174e-21	2.1893e-20
C1QTNF12	protein_coding	112.362	-1.04914	4.31331e-21	6.39348e-20
KRT5	protein_coding	223.232	-1.05009	1.61813e-05	4.71445e-05
CD274	protein_coding	647.147	-1.05143	4.56298e-34	2.21285e-32
CTSK	protein_coding	1859.36	-1.05165	4.97423e-22	8.03441e-21
TNIP3	protein_coding	15.2905	-1.05189	1.43718e-12	9.46515e-12
SLN	protein_coding	4.70925	-1.053	7.60401e-05	0.000202092
OSM	protein_coding	128.07	-1.05366	5.03474e-15	4.24338e-14
UTS2	protein_coding	16.9955	-1.05413	5.69361e-08	2.25136e-07
ZPLD1	protein_coding	18.1331	-1.05471	9.40988e-12	5.66695e-11
OASL	protein_coding	321.857	-1.05525	2.17118e-24	4.40248e-23
GBP5	protein_coding	567.875	-1.05607	1.33801e-12	8.85176e-12
COL8A2	protein_coding	7615.42	-1.05639	1.925e-20	2.67334e-19
FCRLA	protein_coding	115.808	-1.05793	1.9491e-05	5.62415e-05
ICOS	protein_coding	74.8509	-1.05871	7.69678e-11	4.19239e-10
KLHL13	protein_coding	126.1	-1.05875	1.74952e-17	1.84897e-16
MCUB	protein_coding	931.509	-1.05907	4.00768e-36	2.29795e-34
RPTN	protein_coding	0.445	-1.05925	0.00104863	0.00234958
WNT10A	protein_coding	579.129	-1.05937	8.92792e-10	4.33072e-09
PROC	protein_coding	72.9753	-1.05972	2.02862e-24	4.12183e-23
TFAP2C	protein_coding	563.49	-1.05974	6.03258e-35	3.16579e-33
IL2RA	protein_coding	173.036	-1.06045	7.53688e-19	8.99454e-18
TREML2	protein_coding	22.9304	-1.06186	9.62429e-13	6.45109e-12
COL24A1	protein_coding	40.3956	-1.06256	1.77199e-17	1.87122e-16
CXCL14	protein_coding	19630.5	-1.06281	8.50882e-07	2.91734e-06
ARL4C	protein_coding	932.571	-1.06286	2.06134e-23	3.79166e-22
FPR3	protein_coding	589.461	-1.06397	1.51338e-21	2.32861e-20
DIRAS1	protein_coding	159.773	-1.06405	3.67557e-15	3.12846e-14
PCDHAC1	protein_coding	160.669	-1.06453	6.15246e-24	1.19376e-22
SMIM35	protein_coding	0.613303	-1.06533	2.67013e-07	9.72098e-07
MET	protein_coding	30553.5	-1.06713	1.27173e-32	5.45314e-31
PTPRZ1	protein_coding	14.7535	-1.06718	6.48653e-11	3.56009e-10
FST	protein_coding	92.403	-1.06872	2.60842e-14	2.05955e-13
ITGAM	protein_coding	827.495	-1.06911	1.32692e-29	4.38116e-28
CLEC4G	protein_coding	10.0135	-1.07048	6.5304e-11	3.58119e-10
IL18	protein_coding	802.857	-1.07375	4.46061e-21	6.60194e-20
TFPI2	protein_coding	132.835	-1.07394	1.74506e-11	1.0231e-10
KRTAP2-3	protein_coding	20.4542	-1.0745	3.06052e-07	1.10639e-06
SIRPG	protein_coding	114.155	-1.07471	4.61388e-11	2.57982e-10
CXCL3	protein_coding	53.2153	-1.07672	1.72643e-15	1.51871e-14
RAC2	protein_coding	2170.76	-1.07824	6.78747e-21	9.86524e-20
CD101	protein_coding	95.3153	-1.07828	6.74923e-36	3.80386e-34
CCR2	protein_coding	241.944	-1.07903	5.62363e-19	6.78276e-18
CCR6	protein_coding	8.86257	-1.07936	5.53308e-13	3.80403e-12
CACNG6	protein_coding	2.36071	-1.08067	0.000138648	0.000355212
SMYD1	protein_coding	0.463811	-1.08105	0.0084481	0.0161624
MICAL2	protein_coding	3962.47	-1.0821	1.49213e-43	1.70374e-41
LAX1	protein_coding	121.095	-1.08213	6.11629e-09	2.70552e-08
NABP1	protein_coding	570.452	-1.0826	1.27012e-30	4.57756e-29
FBLN1	protein_coding	3279.41	-1.0834	6.97051e-14	5.25054e-13
TMPRSS13	protein_coding	750.528	-1.08354	1.23326e-27	3.39562e-26
EPHX3	protein_coding	104.632	-1.08368	1.41838e-18	1.65433e-17
HCST	protein_coding	235.708	-1.08424	4.86346e-24	9.53937e-23
CRLF1	protein_coding	6461.65	-1.08463	4.85496e-09	2.17305e-08
TBC1D2	protein_coding	5777.19	-1.08553	2.43017e-54	7.52233e-52
DCHS2	protein_coding	176.049	-1.08558	1.21566e-19	1.56483e-18
NT5E	protein_coding	7448.43	-1.08621	5.18338e-28	1.47855e-26
LAMB3	protein_coding	11813.6	-1.08688	3.05197e-14	2.38976e-13
SUGCT	protein_coding	233.175	-1.08716	3.12646e-27	8.26926e-26
CDX1	protein_coding	7.47535	-1.08789	4.47261e-15	3.78409e-14
SCNN1A	protein_coding	12788.8	-1.08809	2.6865e-23	4.88938e-22
GPR68	protein_coding	227.112	-1.08878	1.16016e-21	1.80333e-20
ADAMTSL5	protein_coding	121.895	-1.08982	2.06451e-21	3.13402e-20
ELFN2	protein_coding	328.734	-1.09018	3.99324e-07	1.42447e-06
C1S	protein_coding	4907.04	-1.09022	3.44556e-14	2.681e-13
PSMB9	protein_coding	2443.42	-1.09032	6.15728e-30	2.10308e-28
CALB2	protein_coding	44.6482	-1.0904	3.13242e-09	1.43082e-08
APOBR	protein_coding	549.459	-1.09179	2.27909e-33	1.03674e-31
TSPO2	protein_coding	4.04324	-1.09358	1.13952e-21	1.77212e-20
CCL19	protein_coding	645.773	-1.09435	5.69959e-06	1.7659e-05
UPP1	protein_coding	3628.86	-1.0946	9.42051e-41	8.40653e-39
CNKSR2	protein_coding	153.362	-1.09521	9.58646e-20	1.24901e-18
GULP1	protein_coding	572.283	-1.09846	4.43498e-23	7.89746e-22
MNDA	protein_coding	534.899	-1.09856	5.52067e-32	2.25035e-30
RSAD2	protein_coding	862.616	-1.09911	2.6968e-36	1.56213e-34
TMEM176A	protein_coding	1231.74	-1.0995	1.66906e-22	2.81284e-21
RARRES1	protein_coding	228.205	-1.09975	8.21602e-19	9.75558e-18
SIGLEC12	protein_coding	26.9479	-1.0999	3.54175e-10	1.7947e-09
TRIM15	protein_coding	1.60613	-1.10097	7.7301e-10	3.78443e-09
DUSP5	protein_coding	11570.2	-1.10505	7.01713e-21	1.01729e-19
PSTPIP1	protein_coding	244.268	-1.10515	1.03003e-20	1.46591e-19
TMEM236	protein_coding	35.7944	-1.10517	2.08128e-25	4.6589e-24
ITGA3	protein_coding	52666.5	-1.10563	7.34079e-72	1.00293e-68
DPP4	protein_coding	9853.46	-1.10659	2.47195e-18	2.81521e-17
NCCRP1	protein_coding	68.4799	-1.10793	5.69166e-14	4.32923e-13
ANXA2	protein_coding	40058	-1.10803	6.65524e-55	2.12651e-52
CLEC10A	protein_coding	259.881	-1.10806	2.69847e-17	2.80989e-16
NPSR1	protein_coding	0.784088	-1.10841	1.14101e-05	3.39757e-05
NCR3	protein_coding	29.2505	-1.10866	2.66535e-14	2.10115e-13
CLEC12A	protein_coding	88.9362	-1.10896	7.34291e-21	1.06141e-19
PCDH9	protein_coding	298.779	-1.11003	1.20177e-19	1.54796e-18
CPN2	protein_coding	2.83229	-1.11019	3.81504e-09	1.7269e-08
KIAA1549L	protein_coding	111.993	-1.11132	4.84603e-12	3.009e-11
MEI1	protein_coding	181.893	-1.11247	9.49303e-14	7.03034e-13
ISG15	protein_coding	2575.79	-1.11365	1.54048e-28	4.60991e-27
EGFL6	protein_coding	64.9543	-1.11513	1.10455e-15	9.8611e-15
AMOT	protein_coding	3088.3	-1.11599	7.58558e-55	2.40439e-52
CBLN4	protein_coding	255.519	-1.11689	9.52498e-12	5.73104e-11
ITGB2	protein_coding	4550.41	-1.1177	8.70281e-27	2.20047e-25
LAMC2	protein_coding	15215.2	-1.1183	1.25822e-74	2.266e-71
SLC18A2	protein_coding	25.4735	-1.11852	6.55641e-15	5.46313e-14
LURAP1L	protein_coding	722.077	-1.11859	5.57123e-23	9.81057e-22
CLEC5A	protein_coding	296.407	-1.12051	4.87371e-27	1.26375e-25
HLA-B	protein_coding	120518	-1.12071	8.50819e-42	8.24212e-40
PTPRU	protein_coding	3564.17	-1.12092	8.19467e-37	5.04163e-35
CDX2	protein_coding	0.915102	-1.12209	0.000167833	0.000424928
NSG1	protein_coding	167.969	-1.12321	3.0809e-11	1.75764e-10
MME	protein_coding	261.254	-1.12324	1.3617e-11	8.0694e-11
LGALS12	protein_coding	9.78278	-1.12357	3.28724e-20	4.4604e-19
NTSR1	protein_coding	3.4015	-1.1238	1.53322e-10	8.07386e-10
ANXA3	protein_coding	5420.64	-1.1244	3.63064e-41	3.33758e-39
LSP1	protein_coding	1894.91	-1.12489	5.40921e-23	9.53373e-22
CLEC4F	protein_coding	34.4469	-1.12508	6.74992e-16	6.17498e-15
CHST6	protein_coding	115.353	-1.12536	3.11965e-16	2.94575e-15
MC4R	protein_coding	1.9929	-1.12547	4.59938e-07	1.62809e-06
MS4A6E	protein_coding	1.98028	-1.12549	1.02023e-07	3.9116e-07
IL32	protein_coding	1368.25	-1.12579	6.81212e-25	1.45422e-23
CD7	protein_coding	321.883	-1.12579	5.1358e-16	4.75545e-15
BCL2A1	protein_coding	193.868	-1.12583	9.39062e-21	1.34271e-19
SPINK2	protein_coding	120.469	-1.12608	1.12462e-27	3.10947e-26
FGF10	protein_coding	11.3705	-1.12612	5.04686e-06	1.575e-05
CITED4	protein_coding	995.752	-1.1264	3.73588e-40	3.19696e-38
APOBEC3A	protein_coding	50.2819	-1.12711	1.28148e-19	1.64742e-18
EPHA10	protein_coding	654.883	-1.12822	7.34738e-18	8.02842e-17
CD2	protein_coding	622.709	-1.12879	2.74423e-16	2.60304e-15
PGR	protein_coding	361.318	-1.1291	8.60899e-22	1.35571e-20
IFIT2	protein_coding	1272.78	-1.12925	2.28133e-51	5.57953e-49
ZNF683	protein_coding	196.603	-1.12951	2.00941e-15	1.75789e-14
C3	protein_coding	32909.7	-1.12995	1.61041e-15	1.42013e-14
RLBP1	protein_coding	0.713932	-1.13056	0.000140403	0.00035936
B3GNT6	protein_coding	7.93927	-1.13162	4.69411e-08	1.87561e-07
FUT2	protein_coding	166.593	-1.13169	1.36408e-37	8.99273e-36
TACSTD2	protein_coding	26735.8	-1.1329	2.76129e-12	1.76091e-11
HPGDS	protein_coding	140.984	-1.13322	5.83256e-34	2.81476e-32
TNFAIP6	protein_coding	106.227	-1.13437	4.82614e-22	7.80795e-21
CD300E	protein_coding	74.1661	-1.13446	1.04321e-25	2.40169e-24
BMPR1B	protein_coding	20.9903	-1.13486	7.13428e-14	5.36574e-13
CCL24	protein_coding	14.3228	-1.13624	6.15896e-10	3.04992e-09
FCHO1	protein_coding	354.984	-1.13683	2.47127e-23	4.51633e-22
CIITA	protein_coding	1615.49	-1.13841	2.70158e-27	7.18868e-26
HCK	protein_coding	769.04	-1.13934	1.15205e-29	3.82609e-28
CST6	protein_coding	8448.63	-1.13979	3.07605e-11	1.75513e-10
HPSE	protein_coding	374.965	-1.13994	7.44868e-37	4.59695e-35
ITGB4	protein_coding	7204.87	-1.14063	2.55071e-31	9.83091e-30
HSD11B1	protein_coding	76.3242	-1.14091	7.17282e-15	5.95046e-14
PDZRN3	protein_coding	221.947	-1.14174	9.0721e-21	1.30045e-19
C6orf141	protein_coding	24.6567	-1.14217	6.38702e-15	5.3287e-14
DIPK1C	protein_coding	17.9711	-1.14386	2.45755e-12	1.57634e-11
PTPN7	protein_coding	430.108	-1.145	1.12371e-17	1.20592e-16
TH	protein_coding	19.7745	-1.14618	3.40651e-16	3.20288e-15
ICAM1	protein_coding	6611.73	-1.14644	8.30229e-35	4.28314e-33
SH2D2A	protein_coding	121.177	-1.14651	5.24068e-21	7.69896e-20
MPPED1	protein_coding	1.20597	-1.14665	0.000222643	0.00055282
WNT16	protein_coding	12.1779	-1.14675	1.59659e-13	1.15752e-12
SPN	protein_coding	644.09	-1.14696	1.00972e-26	2.54492e-25
EFNA5	protein_coding	167.287	-1.14767	4.98441e-23	8.81246e-22
CXCL13	protein_coding	548.582	-1.14819	9.97685e-06	2.9951e-05
TMEM61	protein_coding	34.1444	-1.14833	2.72667e-24	5.46175e-23
SECTM1	protein_coding	316.24	-1.14877	1.88308e-24	3.84386e-23
CEACAM3	protein_coding	5.80738	-1.14906	1.17125e-16	1.15151e-15
KRT15	protein_coding	413.196	-1.15001	2.27985e-14	1.80877e-13
SERPINB4	protein_coding	1.48516	-1.15091	0.000692088	0.00159639
FCRL5	protein_coding	222.401	-1.15168	9.30045e-07	3.17311e-06
COL5A2	protein_coding	3986.87	-1.15412	1.28915e-24	2.66168e-23
ADRA2A	protein_coding	336.364	-1.15447	8.6402e-17	8.58408e-16
PRSS21	protein_coding	12.3996	-1.15579	1.70472e-10	8.92712e-10
ERBB3	protein_coding	5441.4	-1.1587	1.01637e-36	6.18581e-35
COL12A1	protein_coding	2195.47	-1.15912	6.57819e-19	7.88368e-18
SLCO4A1	protein_coding	384.072	-1.16037	5.19309e-23	9.16505e-22
PPL	protein_coding	21348.8	-1.16071	3.12521e-51	7.50448e-49
KRT6B	protein_coding	19.6025	-1.1613	0.000285444	0.000697347
DGAT2L6	protein_coding	7.01139	-1.16147	7.95133e-18	8.66208e-17
SERPINA6	protein_coding	0.760993	-1.1617	0.00330526	0.00680512
CDKN2B	protein_coding	714.97	-1.16192	5.72313e-40	4.72408e-38
APOB	protein_coding	8.76169	-1.16224	9.88521e-10	4.77153e-09
PIM2	protein_coding	1640.49	-1.16258	2.05797e-23	3.78723e-22
GPR84	protein_coding	58.4028	-1.16325	1.3753e-30	4.9492e-29
CFHR3	protein_coding	13.4029	-1.16345	4.14877e-18	4.63814e-17
MRGPRX2	protein_coding	1.76563	-1.16458	0.00080465	0.00183625
FOXA1	protein_coding	32.122	-1.16502	1.2428e-12	8.23702e-12
S100A4	protein_coding	12257.4	-1.16597	7.36409e-18	8.04446e-17
OR4D10	protein_coding	33.6994	-1.16607	3.12013e-08	1.27132e-07
JAML	protein_coding	741.41	-1.16686	1.3298e-26	3.30747e-25
OR5A1	protein_coding	3.54643	-1.16726	9.64886e-08	3.71199e-07
OSMR	protein_coding	2493.46	-1.16946	5.92758e-48	1.02112e-45
EVA1A	protein_coding	1276.7	-1.17014	1.15497e-23	2.1843e-22
CARD11	protein_coding	700.11	-1.17039	2.56248e-20	3.50701e-19
MYF6	protein_coding	0.87206	-1.17124	0.0012294	0.0027255
PCDHAC2	protein_coding	265.864	-1.17179	3.28758e-23	5.91541e-22
AC136428.1	protein_coding	16.9872	-1.17265	0.000551978	0.00129186
MEGF10	protein_coding	33.6332	-1.17326	3.27101e-13	2.29788e-12
ARL14EPL	protein_coding	13.0403	-1.17504	8.15066e-13	5.50994e-12
CD300LF	protein_coding	152.118	-1.17556	1.84581e-28	5.48224e-27
NCF2	protein_coding	744.879	-1.17606	1.05424e-30	3.83917e-29
XG	protein_coding	37.8796	-1.17632	2.91607e-17	3.02376e-16
CD3D	protein_coding	289.13	-1.17677	5.21176e-15	4.38512e-14
IL31RA	protein_coding	8.2233	-1.17711	4.39239e-08	1.76109e-07
ALDH1A3	protein_coding	1344.76	-1.17793	3.86298e-23	6.91306e-22
MGAT3	protein_coding	2812	-1.17909	7.9438e-18	8.65625e-17
DEFB1	protein_coding	58.6382	-1.17984	1.57183e-11	9.26131e-11
CTSC	protein_coding	18982.3	-1.18079	1.04874e-34	5.37545e-33
TIGIT	protein_coding	272.107	-1.18161	1.29036e-14	1.04637e-13
IFNG	protein_coding	19.4346	-1.18272	7.53861e-10	3.69617e-09
CPNE7	protein_coding	36.2112	-1.18289	5.83168e-19	7.02514e-18
LAG3	protein_coding	231.718	-1.18397	4.17488e-16	3.89482e-15
C2	protein_coding	571.532	-1.184	5.51511e-22	8.87548e-21
BRINP2	protein_coding	147.314	-1.18653	1.12488e-11	6.72332e-11
CBLN1	protein_coding	1400.74	-1.18763	8.60855e-12	5.20255e-11
RTL3	protein_coding	1.82513	-1.1905	1.35345e-07	5.11591e-07
PRSS3	protein_coding	14.0681	-1.19052	9.39799e-24	1.78932e-22
HLA-DMA	protein_coding	5379.83	-1.19263	4.54107e-40	3.82812e-38
CXCL9	protein_coding	2926.9	-1.19324	3.59702e-10	1.82105e-09
KLK7	protein_coding	2703.22	-1.19353	2.12725e-08	8.8422e-08
BATF3	protein_coding	126.024	-1.19358	2.51758e-37	1.62989e-35
KRT34	protein_coding	0.423715	-1.19429	0.000523957	0.00123035
DOK2	protein_coding	380.352	-1.19479	4.88365e-31	1.83931e-29
INAVA	protein_coding	267.169	-1.19607	2.02964e-12	1.31614e-11
AQP3	protein_coding	263.435	-1.19643	2.38655e-22	3.97301e-21
CNTN1	protein_coding	85.9541	-1.19646	3.37498e-09	1.53631e-08
CCDC185	protein_coding	4.07373	-1.19716	4.66774e-12	2.90285e-11
CRP	protein_coding	1.42443	-1.19778	4.99871e-09	2.23411e-08
NR2F1	protein_coding	1356.86	-1.1989	8.26837e-37	5.07909e-35
SFTPA2	protein_coding	269.029	-1.19996	3.56598e-07	1.27874e-06
FOXQ1	protein_coding	2345.87	-1.20001	1.15826e-23	2.18948e-22
JSRP1	protein_coding	104.982	-1.201	8.01036e-14	5.99166e-13
CLDN16	protein_coding	6637.6	-1.20259	5.02969e-15	4.24003e-14
PERP	protein_coding	15991.5	-1.20296	1.92601e-74	3.31785e-71
ZBP1	protein_coding	121.028	-1.20516	2.20817e-13	1.58181e-12
TMEM244	protein_coding	1.48873	-1.20551	5.73817e-08	2.26785e-07
ITGBL1	protein_coding	384.383	-1.20566	6.51026e-17	6.5501e-16
CRACD	protein_coding	49.1336	-1.20621	4.90276e-18	5.42907e-17
PDLIM4	protein_coding	8119.75	-1.20648	3.0578e-20	4.16333e-19
SCN1A	protein_coding	5.93241	-1.20704	1.30473e-07	4.93978e-07
CFH	protein_coding	7200.46	-1.2086	1.51304e-26	3.74909e-25
CTLA4	protein_coding	105.634	-1.21114	5.48694e-14	4.17752e-13
ANXA13	protein_coding	1.98795	-1.21116	6.27392e-08	2.469e-07
IL2RG	protein_coding	1225.45	-1.21153	2.5606e-18	2.91366e-17
IBSP	protein_coding	24.9948	-1.21159	2.49276e-10	1.28384e-09
LST1	protein_coding	577.405	-1.21227	2.07053e-33	9.47303e-32
CLEC4D	protein_coding	7.47456	-1.21322	3.12431e-18	3.53176e-17
ADH4	protein_coding	1.65169	-1.21535	3.49808e-06	1.11279e-05
GPR33	protein_coding	1.51567	-1.21618	4.14555e-09	1.86967e-08
JAKMIP2	protein_coding	25.2619	-1.21655	9.4317e-20	1.22966e-18
MSMB	protein_coding	8.6386	-1.2171	3.80665e-07	1.36061e-06
NLRP7	protein_coding	9.48297	-1.21793	1.39453e-12	9.20392e-12
IFNL1	protein_coding	1.41314	-1.21905	5.45297e-10	2.71559e-09
SLURP1	protein_coding	0.628046	-1.21915	3.56572e-05	9.93022e-05
CXCL6	protein_coding	3.2228	-1.21954	6.22559e-07	2.16829e-06
MAB21L4	protein_coding	47.4104	-1.22048	3.23575e-16	3.05174e-15
GUCA1A	protein_coding	1.48284	-1.22233	6.80137e-08	2.66492e-07
TIFAB	protein_coding	25.4528	-1.22301	2.1782e-12	1.40604e-11
SERPINA9	protein_coding	11.5035	-1.22317	0.000484016	0.00114238
NGEF	protein_coding	2655.91	-1.22317	1.71425e-19	2.17833e-18
CD74	protein_coding	157658	-1.22436	1.24952e-35	6.90479e-34
IL2	protein_coding	1.42182	-1.22525	1.26427e-08	5.39604e-08
OMD	protein_coding	198.71	-1.2267	1.94199e-10	1.01175e-09
SPRR2A	protein_coding	0.85036	-1.22685	0.00510548	0.0101523
C11orf87	protein_coding	0.596338	-1.22884	5.3047e-05	0.000144293
CPA4	protein_coding	6.40207	-1.22943	5.98336e-16	5.49401e-15
CLEC3A	protein_coding	0.368794	-1.22954	0.00031893	0.000773574
HLA-DOB	protein_coding	326.754	-1.22993	8.32655e-20	1.09277e-18
SNX20	protein_coding	318.181	-1.23074	4.31969e-24	8.52343e-23
TMEM158	protein_coding	55.8442	-1.23139	5.54824e-28	1.57808e-26
HCN4	protein_coding	322.102	-1.2328	1.70779e-23	3.16483e-22
RUNX1	protein_coding	3521.99	-1.23285	4.06962e-46	6.01651e-44
FAM111B	protein_coding	420.667	-1.23307	1.41384e-34	7.20947e-33
RAET1L	protein_coding	9.72836	-1.23413	9.80605e-19	1.15529e-17
MMP16	protein_coding	1230.59	-1.23415	1.63578e-22	2.76027e-21
LAIR2	protein_coding	16.2907	-1.23468	3.49865e-16	3.28639e-15
RHOV	protein_coding	275.79	-1.2363	1.42453e-23	2.6661e-22
TM4SF1	protein_coding	13277.3	-1.23666	6.58888e-27	1.68751e-25
SERPINB5	protein_coding	31.2788	-1.23747	3.70822e-07	1.327e-06
KLK10	protein_coding	6126.58	-1.23792	2.39062e-11	1.38074e-10
CD80	protein_coding	50.6641	-1.23808	1.90434e-25	4.27975e-24
FGG	protein_coding	2.18194	-1.23883	0.00184603	0.00396819
HTR2A	protein_coding	6.52809	-1.23896	3.68274e-18	4.13471e-17
LHX5	protein_coding	2.89535	-1.24308	4.4785e-14	3.44616e-13
DCC	protein_coding	15.7582	-1.2432	2.80427e-11	1.607e-10
LCP1	protein_coding	5699.55	-1.24397	3.3765e-29	1.06513e-27
CATSPER1	protein_coding	217.693	-1.24412	8.21644e-19	9.75558e-18
SYNGR3	protein_coding	69.0202	-1.25159	6.05732e-30	2.0743e-28
MRC1	protein_coding	1350.89	-1.25179	1.13563e-26	2.84776e-25
CARD17	protein_coding	2.42299	-1.25268	2.59389e-11	1.49227e-10
CLEC4C	protein_coding	2.54268	-1.25269	1.27866e-07	4.84522e-07
SLC22A16	protein_coding	4.23818	-1.253	9.40127e-16	8.46178e-15
NOD2	protein_coding	122.742	-1.25462	6.56612e-30	2.23502e-28
SPOCK2	protein_coding	22214.1	-1.2548	9.9264e-20	1.29203e-18
CXCL10	protein_coding	545.02	-1.25656	1.11859e-14	9.12115e-14
VSTM1	protein_coding	5.53676	-1.25725	2.52268e-14	1.99424e-13
KLF17	protein_coding	0.769295	-1.25795	1.51512e-07	5.69386e-07
OR5A2	protein_coding	0.611074	-1.25883	1.45274e-05	4.25796e-05
FFAR4	protein_coding	61.7391	-1.26113	9.12327e-30	3.07114e-28
TRPM8	protein_coding	9.11498	-1.26115	1.08051e-11	6.46496e-11
ITGA11	protein_coding	539.172	-1.26165	1.04073e-27	2.89367e-26
UBD	protein_coding	119.949	-1.26461	4.23964e-09	1.9095e-08
F2RL2	protein_coding	90.3123	-1.2663	1.66696e-18	1.93232e-17
HK3	protein_coding	297.391	-1.26826	4.92851e-27	1.27629e-25
TREM1	protein_coding	678.473	-1.27441	2.90915e-19	3.61214e-18
RFLNA	protein_coding	60.2372	-1.27451	6.7855e-39	5.13069e-37
EPHB3	protein_coding	1452.64	-1.27479	3.14482e-32	1.31021e-30
VSTM2L	protein_coding	888.077	-1.27857	1.7869e-25	4.02952e-24
MUC7	protein_coding	0.780777	-1.2793	6.99626e-05	0.00018688
HLA-DPB1	protein_coding	17050.7	-1.27963	7.0198e-33	3.06988e-31
NFE2L3	protein_coding	2562.24	-1.28011	2.23072e-27	5.9921e-26
VGLL2	protein_coding	0.387908	-1.28022	0.0153595	0.0278186
IFNL2	protein_coding	0.621276	-1.28052	3.42055e-06	1.08943e-05
IL11	protein_coding	14.2166	-1.28076	1.61614e-17	1.71257e-16
TCN1	protein_coding	28.8677	-1.28183	2.63975e-09	1.2146e-08
PLA2G2E	protein_coding	24.2847	-1.28254	1.48663e-09	7.0339e-09
DAPP1	protein_coding	200.875	-1.28391	1.56471e-21	2.40291e-20
GALNT13	protein_coding	26.581	-1.28524	2.30488e-11	1.33278e-10
ACBD7	protein_coding	230.014	-1.28534	4.14101e-27	1.08656e-25
IL17C	protein_coding	6.18201	-1.28696	5.27593e-26	1.25097e-24
PIGR	protein_coding	254.89	-1.28766	4.38612e-18	4.88977e-17
NNMT	protein_coding	1258.95	-1.28799	1.97527e-23	3.6401e-22
OR4D6	protein_coding	7.48974	-1.28821	1.37894e-10	7.2983e-10
MMP12	protein_coding	112.618	-1.28879	3.08928e-10	1.57692e-09
PNOC	protein_coding	53.2989	-1.29368	7.60042e-09	3.326e-08
PKIB	protein_coding	219.759	-1.29387	3.55891e-47	5.73201e-45
NCAM2	protein_coding	87.2132	-1.29759	2.94045e-30	1.0301e-28
GNA15	protein_coding	320.107	-1.29835	3.50839e-38	2.42593e-36
OR5AN1	protein_coding	0.928797	-1.29869	1.18791e-07	4.51822e-07
MCHR1	protein_coding	2.77175	-1.29919	4.63759e-14	3.5645e-13
L1CAM	protein_coding	166.897	-1.29963	2.65155e-18	3.01282e-17
VSIG1	protein_coding	67.5188	-1.30228	1.23708e-27	3.40377e-26
LHX1	protein_coding	0.878563	-1.30296	1.40636e-05	4.13179e-05
GBX2	protein_coding	19.8797	-1.30331	5.81324e-11	3.20968e-10
RNASE3	protein_coding	1.9167	-1.30577	1.12028e-16	1.1036e-15
IGFL4	protein_coding	15.2252	-1.30625	9.19403e-20	1.20144e-18
PRSS12	protein_coding	210.341	-1.30723	7.03983e-18	7.70086e-17
BCAT1	protein_coding	1391.67	-1.30738	4.5215e-32	1.85837e-30
HLA-DRA	protein_coding	43503	-1.30864	2.53164e-33	1.14636e-31
PROS1	protein_coding	18163.7	-1.31086	5.3942e-38	3.663e-36
UCN2	protein_coding	4.01544	-1.31096	2.02042e-09	9.42885e-09
GAP43	protein_coding	686.617	-1.31124	1.23038e-09	5.87407e-09
PLAUR	protein_coding	1886.35	-1.31383	9.63967e-30	3.22579e-28
ITGB6	protein_coding	2623.45	-1.3148	1.6975e-51	4.20355e-49
HLA-DQA1	protein_coding	7543.01	-1.31909	2.30772e-25	5.13676e-24
TNNI2	protein_coding	28.5095	-1.32283	2.26607e-26	5.52176e-25
TNFRSF17	protein_coding	99.8145	-1.32355	5.83444e-09	2.58778e-08
SLAMF7	protein_coding	797.211	-1.32941	2.60938e-14	2.0599e-13
ANPEP	protein_coding	899.271	-1.3296	1.4186e-32	6.06323e-31
ZNF469	protein_coding	207.04	-1.33203	4.38933e-30	1.51621e-28
HLA-DRB1	protein_coding	25326.5	-1.33344	6.10034e-36	3.44795e-34
DCLK1	protein_coding	519.537	-1.33397	1.099e-31	4.3587e-30
IL26	protein_coding	1.85943	-1.33949	3.65202e-09	1.65651e-08
OSCAR	protein_coding	287.552	-1.34011	2.04672e-36	1.20316e-34
PDCD1LG2	protein_coding	154.963	-1.34086	2.60648e-38	1.84413e-36
LYZ	protein_coding	6253.09	-1.34586	8.27392e-21	1.18991e-19
ZNF385B	protein_coding	28.2503	-1.34702	1.57649e-15	1.39176e-14
CCL23	protein_coding	23.4232	-1.34813	1.25285e-24	2.58941e-23
PLAU	protein_coding	11400.5	-1.35042	1.21856e-24	2.52514e-23
AGXT	protein_coding	1.55746	-1.35092	4.57178e-06	1.43385e-05
ISL2	protein_coding	4.04027	-1.35169	2.85932e-09	1.31091e-08
CD52	protein_coding	1355.96	-1.35172	1.21252e-26	3.031e-25
GRHL3	protein_coding	386.856	-1.35248	2.64235e-29	8.41581e-28
CDSN	protein_coding	45.7112	-1.35293	3.45449e-17	3.56063e-16
FGB	protein_coding	2.43684	-1.35448	0.00366821	0.00748741
CLEC6A	protein_coding	4.37255	-1.35488	9.52058e-16	8.55945e-15
NALCN	protein_coding	272.78	-1.35573	6.2872e-21	9.17514e-20
PI3	protein_coding	8.69844	-1.35646	3.7457e-12	2.35308e-11
HTR1D	protein_coding	23.0759	-1.35667	7.64863e-32	3.07349e-30
TNFSF4	protein_coding	195.335	-1.35742	1.55251e-33	7.19438e-32
OLR1	protein_coding	678.578	-1.35838	3.76645e-29	1.18531e-27
RNF225	protein_coding	28.3751	-1.3588	6.32557e-22	1.01304e-20
ROS1	protein_coding	13.4974	-1.36169	2.7859e-06	8.96963e-06
CD55	protein_coding	21851.7	-1.36258	7.60249e-30	2.57452e-28
JPH3	protein_coding	73.6726	-1.36337	4.3165e-17	4.4067e-16
MACC1	protein_coding	1474.89	-1.36374	7.70029e-34	3.66698e-32
ROR1	protein_coding	266.41	-1.36594	3.24007e-30	1.13205e-28
COL6A3	protein_coding	10534	-1.36645	8.54501e-28	2.39266e-26
OPRPN	protein_coding	1.44296	-1.36964	1.58003e-07	5.92096e-07
PITX2	protein_coding	3.23699	-1.36967	3.81725e-08	1.5411e-07
CEACAM1	protein_coding	283.398	-1.36992	3.80587e-30	1.32274e-28
TNFSF11	protein_coding	63.6111	-1.37074	4.41986e-14	3.40302e-13
LCE1B	protein_coding	0.509875	-1.37365	1.32731e-07	5.02047e-07
AGRP	protein_coding	5.57754	-1.378	1.05063e-27	2.91711e-26
SCRT2	protein_coding	0.776324	-1.37938	0.000577989	0.00134891
PTGES	protein_coding	211.83	-1.38003	2.65065e-35	1.42692e-33
IL17A	protein_coding	0.663994	-1.38153	5.33667e-07	1.87451e-06
MS4A15	protein_coding	13.1726	-1.38171	4.71906e-10	2.36227e-09
COLEC12	protein_coding	598.657	-1.38178	1.29856e-28	3.91852e-27
BIRC3	protein_coding	1574.48	-1.38188	5.32591e-27	1.37381e-25
CD79A	protein_coding	1163.31	-1.38378	3.71518e-09	1.68362e-08
NBL1	protein_coding	2437.42	-1.38442	4.98872e-37	3.14242e-35
DHDH	protein_coding	96.1631	-1.3851	3.36115e-34	1.65431e-32
CGA	protein_coding	3.33863	-1.38575	4.23582e-08	1.70176e-07
OBP2A	protein_coding	6.20836	-1.3875	5.94634e-11	3.27814e-10
STMN2	protein_coding	129.436	-1.38971	9.28326e-13	6.23093e-12
JCHAIN	protein_coding	7184.24	-1.39107	3.50936e-10	1.7792e-09
SPTBN2	protein_coding	1234	-1.39719	2.82285e-43	3.13694e-41
ALOX5AP	protein_coding	1037.98	-1.39826	2.14136e-44	2.64308e-42
NECTIN4	protein_coding	1951.79	-1.39917	2.07829e-29	6.70554e-28
PCSK9	protein_coding	10.9716	-1.39932	1.51584e-13	1.09998e-12
CKM	protein_coding	7.33342	-1.39934	4.2119e-22	6.84214e-21
LPAR3	protein_coding	31.1294	-1.40068	7.52576e-19	8.98398e-18
HLA-DQB1	protein_coding	12948.4	-1.40164	9.60086e-35	4.9338e-33
CIBAR2	protein_coding	10.9931	-1.40207	4.70608e-09	2.10999e-08
CDH6	protein_coding	3232.96	-1.4025	2.90833e-42	2.96987e-40
NPY2R	protein_coding	0.738945	-1.40279	8.93092e-05	0.00023504
TNFRSF9	protein_coding	126.688	-1.40291	3.70318e-22	6.04298e-21
BATF	protein_coding	153.095	-1.40528	1.97367e-25	4.43053e-24
DUSP13	protein_coding	65.6254	-1.4067	4.04005e-18	4.5205e-17
HLA-DPA1	protein_coding	20577.2	-1.40694	2.62703e-33	1.18819e-31
RNASE2	protein_coding	30.6406	-1.40791	4.85504e-30	1.67271e-28
ADGRE3	protein_coding	11.822	-1.40891	7.67677e-30	2.59745e-28
TEX11	protein_coding	2.09612	-1.41096	1.11383e-16	1.09779e-15
CLDN10	protein_coding	1173.28	-1.41301	5.71397e-11	3.15883e-10
DSC2	protein_coding	2051.24	-1.41346	2.04254e-61	1.0244e-58
RGS4	protein_coding	745.886	-1.41368	6.39433e-17	6.44655e-16
ALPK2	protein_coding	30.4886	-1.41377	2.44861e-11	1.41176e-10
TNNT1	protein_coding	47.4248	-1.41468	3.73824e-10	1.88919e-09
EBI3	protein_coding	303.223	-1.41699	5.44449e-40	4.52235e-38
ASPHD1	protein_coding	205.529	-1.41828	3.0302e-27	8.02e-26
KCNQ3	protein_coding	2089.53	-1.42212	2.65992e-34	1.32731e-32
CDC42EP3	protein_coding	4405.4	-1.42311	5.39594e-82	1.64456e-78
TGFBR3L	protein_coding	58.8224	-1.42417	1.58269e-22	2.67297e-21
LAMP5	protein_coding	1295.77	-1.42535	3.34042e-14	2.60124e-13
CTSE	protein_coding	1985.86	-1.4254	9.722e-19	1.14641e-17
DAZL	protein_coding	1.96262	-1.42553	2.17709e-06	7.10064e-06
LDLR	protein_coding	1947.19	-1.42569	5.81797e-40	4.79238e-38
SFTA2	protein_coding	137.758	-1.429	4.29305e-25	9.32537e-24
SERPINA1	protein_coding	113741	-1.42928	1.60892e-25	3.64685e-24
S100A6	protein_coding	143329	-1.4336	1.33089e-57	5.32636e-55
ABCA12	protein_coding	48.3032	-1.43479	3.86815e-43	4.24543e-41
ERICH3	protein_coding	35.3991	-1.43542	2.24097e-14	1.77935e-13
CLGN	protein_coding	54.8032	-1.43594	4.70501e-19	5.71482e-18
CSTA	protein_coding	136.981	-1.43655	1.01871e-33	4.78225e-32
CH25H	protein_coding	427.313	-1.43933	2.51594e-27	6.7218e-26
FAT3	protein_coding	13.0006	-1.43961	1.10245e-19	1.42933e-18
KRT32	protein_coding	0.429991	-1.44104	5.83156e-06	1.80562e-05
CLC	protein_coding	1.19364	-1.44119	5.6207e-10	2.79665e-09
INSL3	protein_coding	27.4925	-1.44519	2.51672e-25	5.58002e-24
TNC	protein_coding	8717.99	-1.44615	3.10544e-26	7.47968e-25
DEPDC1B	protein_coding	660.558	-1.44636	7.42388e-27	1.89402e-25
BNIP5	protein_coding	2.63014	-1.44738	1.15193e-12	7.66422e-12
SNCG	protein_coding	1301.73	-1.44786	1.25839e-37	8.30976e-36
TINCR	protein_coding	216.339	-1.44989	7.37e-16	6.71074e-15
SERPINA12	protein_coding	0.411158	-1.45071	5.26228e-06	1.63874e-05
NEURL3	protein_coding	9.52204	-1.4538	3.34644e-24	6.64608e-23
TRIM46	protein_coding	95.9722	-1.4557	6.52047e-33	2.86416e-31
GOLGA7B	protein_coding	639.601	-1.45716	1.48333e-41	1.40938e-39
CD8B2	protein_coding	2.65482	-1.45721	1.19548e-12	7.9327e-12
PMAIP1	protein_coding	450.313	-1.45855	1.03733e-42	1.10484e-40
DRD5	protein_coding	0.887282	-1.46365	9.10047e-09	3.94496e-08
FUT6	protein_coding	3.32365	-1.46433	1.47637e-18	1.71893e-17
FCRLB	protein_coding	144.632	-1.46587	5.27807e-42	5.25433e-40
COMP	protein_coding	3351.62	-1.46782	4.86929e-15	4.11006e-14
S100A8	protein_coding	226.989	-1.47433	4.146e-35	2.20791e-33
SEMA3C	protein_coding	444.126	-1.47442	7.03596e-30	2.39289e-28
KRT80	protein_coding	1801.71	-1.47476	1.14758e-39	9.26038e-38
MS4A8	protein_coding	3.81854	-1.47612	6.34775e-08	2.49558e-07
TGM5	protein_coding	3.92854	-1.47612	1.63233e-22	2.75562e-21
NEFM	protein_coding	6.92483	-1.47815	2.70056e-15	2.33113e-14
CCKAR	protein_coding	0.653164	-1.47903	2.19714e-05	6.29774e-05
KRT23	protein_coding	4.57369	-1.47941	1.71704e-15	1.51079e-14
REELD1	protein_coding	11.3043	-1.47952	4.28382e-23	7.63859e-22
GNG8	protein_coding	4.31264	-1.47975	7.03295e-18	7.69545e-17
SFRP5	protein_coding	6.93156	-1.47985	3.74274e-11	2.11271e-10
UNC5CL	protein_coding	481.99	-1.47998	1.27768e-51	3.20399e-49
ASPN	protein_coding	1240.08	-1.48189	1.3613e-27	3.71973e-26
ARNTL2	protein_coding	336.035	-1.4863	6.82061e-61	3.17929e-58
PMCH	protein_coding	4.26812	-1.48682	9.38855e-11	5.05688e-10
STYK1	protein_coding	34.6074	-1.48729	4.15148e-42	4.17476e-40
NKD2	protein_coding	117.006	-1.48934	2.0937e-31	8.12485e-30
CRLF2	protein_coding	141.66	-1.49209	1.31721e-14	1.06748e-13
INSM2	protein_coding	1.82515	-1.49233	4.04075e-13	2.81319e-12
LCE1C	protein_coding	0.547441	-1.49238	6.50029e-08	2.55301e-07
FOXP3	protein_coding	197.522	-1.49295	1.56394e-46	2.41109e-44
DCSTAMP	protein_coding	8077.09	-1.49842	2.01956e-12	1.31025e-11
KRT16	protein_coding	57.2154	-1.50322	8.91743e-11	4.82147e-10
AC008763.3	protein_coding	0.351879	-1.50871	3.61537e-05	0.000100572
TGM2	protein_coding	9785.61	-1.51269	5.74591e-61	2.71022e-58
TNFRSF18	protein_coding	183.896	-1.51292	4.08379e-31	1.54836e-29
PHACTR3	protein_coding	123.108	-1.51509	1.04872e-27	2.91385e-26
SLC24A2	protein_coding	22.1384	-1.51611	5.45842e-10	2.71796e-09
CXCL8	protein_coding	556.945	-1.51686	1.0893e-24	2.27272e-23
CRYBG2	protein_coding	127.618	-1.52385	7.05627e-39	5.30505e-37
ETV7	protein_coding	327.332	-1.52547	5.04756e-45	6.60031e-43
GALNT5	protein_coding	302.577	-1.5261	3.03233e-21	4.54058e-20
GPR12	protein_coding	6.94715	-1.52693	3.26889e-10	1.66367e-09
IGFL2	protein_coding	554.057	-1.52834	4.64681e-14	3.57081e-13
SPOCD1	protein_coding	160.335	-1.5318	4.0916e-30	1.41584e-28
TUBB3	protein_coding	124.299	-1.53341	1.62617e-30	5.82028e-29
C11orf53	protein_coding	0.717066	-1.53346	8.6525e-08	3.3472e-07
ARHGEF38	protein_coding	666.283	-1.53503	1.41661e-29	4.65404e-28
MYO1G	protein_coding	2713.07	-1.5371	4.33051e-27	1.1303e-25
COL5A1	protein_coding	5024.39	-1.53857	3.00842e-31	1.15277e-29
MISP	protein_coding	592.733	-1.53873	1.44708e-22	2.4565e-21
LTA	protein_coding	36.9077	-1.53961	7.24995e-25	1.54022e-23
CFTR	protein_coding	61.4587	-1.54435	4.25184e-27	1.11343e-25
KCND2	protein_coding	19.2119	-1.54498	8.46496e-22	1.33515e-20
THBS2	protein_coding	2990.7	-1.54596	1.17636e-30	4.25259e-29
SPATA12	protein_coding	12.1272	-1.54679	2.43406e-52	6.38674e-50
LY6G6C	protein_coding	124.54	-1.54744	1.15771e-22	1.98398e-21
GDF15	protein_coding	6747.46	-1.54775	2.56429e-37	1.65742e-35
IL1RL1	protein_coding	2911.8	-1.55243	2.24055e-13	1.60385e-12
NIPAL4	protein_coding	80.8522	-1.55249	2.85782e-31	1.09612e-29
MEIKIN	protein_coding	1.09567	-1.55384	7.43465e-19	8.88057e-18
PSG7	protein_coding	1.02075	-1.55488	2.09832e-07	7.74597e-07
CORIN	protein_coding	78.4559	-1.55631	1.0463e-39	8.4603e-38
ELF3	protein_coding	3510.54	-1.5575	1.9444e-49	3.91062e-47
TNFSF9	protein_coding	139.346	-1.55794	2.12869e-23	3.91009e-22
NT5DC4	protein_coding	5.84361	-1.56029	3.9482e-29	1.24152e-27
IL1F10	protein_coding	0.796097	-1.56102	2.03212e-12	1.31732e-11
SLAMF9	protein_coding	4.61243	-1.56108	3.07448e-19	3.81026e-18
NXPE4	protein_coding	4.65568	-1.56306	2.70511e-09	1.24338e-08
BEAN1	protein_coding	532.196	-1.56904	4.7374e-59	2.04022e-56
MYEOV	protein_coding	87.5252	-1.56967	4.94378e-28	1.41326e-26
S100A10	protein_coding	8941.48	-1.57356	6.18017e-54	1.84109e-51
CXCL11	protein_coding	210.964	-1.57405	7.35183e-19	8.78693e-18
PLEKHS1	protein_coding	28.1368	-1.57406	1.43131e-16	1.39611e-15
INHBA	protein_coding	942.516	-1.5742	1.48457e-36	8.84514e-35
CCR8	protein_coding	19.1801	-1.57946	2.94673e-23	5.32873e-22
GPA33	protein_coding	22.9195	-1.58007	1.71681e-30	6.10608e-29
SERPINB7	protein_coding	5.58814	-1.58345	1.52152e-12	1.00007e-11
FCER1A	protein_coding	312.702	-1.58367	3.51021e-28	1.01889e-26
RNF223	protein_coding	20.8584	-1.58544	1.90168e-22	3.18455e-21
HLA-DRB5	protein_coding	8909.54	-1.58603	3.96371e-39	3.06731e-37
CCR9	protein_coding	18.2302	-1.58775	8.62399e-17	8.57013e-16
COL6A5	protein_coding	18.4892	-1.59168	1.20414e-10	6.40736e-10
MFAP5	protein_coding	383.928	-1.59206	5.56038e-17	5.64313e-16
WFDC10B	protein_coding	1.80831	-1.5922	5.20704e-17	5.29402e-16
SLC35D3	protein_coding	4.44755	-1.59372	1.89058e-14	1.51204e-13
IL36RN	protein_coding	86.0472	-1.59461	3.35019e-35	1.79133e-33
IFNL3	protein_coding	0.390034	-1.59674	7.23138e-05	0.000192757
S100A9	protein_coding	741.657	-1.59745	5.00741e-36	2.85466e-34
GNLY	protein_coding	1080.16	-1.599	2.54677e-27	6.78586e-26
COL1A2	protein_coding	44205.2	-1.59992	2.24163e-33	1.02204e-31
CFB	protein_coding	940.758	-1.60026	7.29336e-31	2.6931e-29
CLCA2	protein_coding	42.7999	-1.60313	1.17965e-14	9.60522e-14
KLK8	protein_coding	16.3842	-1.60659	3.65752e-14	2.83868e-13
TMPRSS11F	protein_coding	3.87404	-1.6084	5.1832e-19	6.26872e-18
UPK2	protein_coding	34.5012	-1.60989	3.02472e-29	9.57973e-28
GPNMB	protein_coding	7713	-1.61024	1.30935e-36	7.89619e-35
AMPD1	protein_coding	32.1409	-1.61318	2.8719e-09	1.31638e-08
SFRP4	protein_coding	1783.62	-1.61345	5.13025e-19	6.20848e-18
PLA2G2A	protein_coding	330.666	-1.61349	3.48071e-13	2.43742e-12
DRGX	protein_coding	3.2732	-1.61358	2.26511e-12	1.46023e-11
HLA-DOA	protein_coding	2720.05	-1.61784	3.96528e-34	1.92771e-32
CSF2	protein_coding	82.6096	-1.62518	1.48237e-25	3.3658e-24
KRT79	protein_coding	5.00949	-1.62577	2.9479e-19	3.65911e-18
ITGA2	protein_coding	5087.08	-1.62802	1.04981e-56	3.96136e-54
HLA-DQA2	protein_coding	2012.73	-1.63188	6.05541e-26	1.4281e-24
FDCSP	protein_coding	135.617	-1.6326	9.07561e-05	0.000238721
AQP9	protein_coding	117.882	-1.63499	1.83795e-34	9.28843e-33
IL36G	protein_coding	2.66498	-1.63747	5.06618e-09	2.26376e-08
KCNE5	protein_coding	10.9347	-1.63792	2.42871e-38	1.73384e-36
SLC19A3	protein_coding	20.311	-1.63862	3.26207e-24	6.48828e-23
KRT13	protein_coding	96.5383	-1.64289	2.77161e-17	2.8815e-16
GPR1	protein_coding	29.3296	-1.64495	1.67188e-21	2.56352e-20
SULT2B1	protein_coding	507.506	-1.646	8.68505e-51	1.94413e-48
FCN1	protein_coding	303.106	-1.64691	3.11451e-37	1.99354e-35
CDH11	protein_coding	2262.53	-1.64703	3.60691e-33	1.60753e-31
ALDH3B2	protein_coding	32.5983	-1.65026	5.68105e-23	9.98176e-22
PDYN	protein_coding	1.2582	-1.65494	1.29905e-14	1.05319e-13
C19orf33	protein_coding	2363.39	-1.6585	2.23764e-36	1.3115e-34
GPR87	protein_coding	39.1055	-1.6586	2.18734e-17	2.29758e-16
CYP2S1	protein_coding	1079.28	-1.66033	4.32454e-38	2.95418e-36
CCL13	protein_coding	259.489	-1.66343	1.93712e-26	4.75235e-25
FPR2	protein_coding	25.6633	-1.66731	4.81251e-26	1.1452e-24
SLC6A20	protein_coding	687.793	-1.67033	2.95734e-15	2.53841e-14
RXFP2	protein_coding	2.86486	-1.6752	1.15669e-13	8.49788e-13
AKAIN1	protein_coding	1.09107	-1.67553	2.1968e-13	1.57452e-12
VSNL1	protein_coding	55.8555	-1.67701	2.17659e-25	4.85579e-24
ADCY8	protein_coding	632.549	-1.67714	4.63769e-14	3.5645e-13
IGLL1	protein_coding	8.9963	-1.67801	5.88521e-16	5.40765e-15
HLA-DQB2	protein_coding	2482.2	-1.6808	2.70837e-34	1.3481e-32
MARCO	protein_coding	863.081	-1.68264	6.7868e-25	1.44959e-23
PAEP	protein_coding	2.31585	-1.68471	6.49325e-10	3.20504e-09
INSRR	protein_coding	5.75251	-1.68975	6.69864e-20	8.86166e-19
KRT17	protein_coding	1938.96	-1.69038	6.28037e-16	5.75739e-15
GPR25	protein_coding	8.96802	-1.69046	5.39236e-20	7.1719e-19
INA	protein_coding	30.3333	-1.69049	3.68562e-34	1.80282e-32
MYBPH	protein_coding	137.666	-1.69335	4.6167e-23	8.20629e-22
PROM1	protein_coding	241.039	-1.69387	2.09468e-19	2.64394e-18
OCSTAMP	protein_coding	4.62171	-1.69704	8.61687e-18	9.34855e-17
ADRB3	protein_coding	10.5797	-1.70831	7.68844e-24	1.47375e-22
ALOX15B	protein_coding	3283.74	-1.71629	4.40341e-34	2.13808e-32
FXYD3	protein_coding	290.598	-1.71793	1.06801e-17	1.14957e-16
KRT6A	protein_coding	190.875	-1.72367	1.07973e-11	6.46124e-11
IL1RN	protein_coding	1111.26	-1.72666	2.78747e-53	7.77764e-51
PLPPR3	protein_coding	19.0045	-1.73137	1.58689e-41	1.50058e-39
CD1C	protein_coding	244.714	-1.73161	1.48067e-29	4.85241e-28
DSC3	protein_coding	515.165	-1.73417	1.18378e-16	1.16326e-15
CD207	protein_coding	419.826	-1.73572	1.10793e-20	1.57282e-19
LBP	protein_coding	17.3024	-1.75032	1.50702e-10	7.94224e-10
LUM	protein_coding	6181.13	-1.75333	1.38877e-26	3.4498e-25
KRT19	protein_coding	20925.2	-1.76056	1.5926e-46	2.44575e-44
ANXA8	protein_coding	27.7549	-1.7631	1.62066e-12	1.06311e-11
CSRP3	protein_coding	0.797715	-1.76654	3.9994e-05	0.000110518
NMU	protein_coding	1269.81	-1.76752	6.89166e-18	7.54294e-17
PPBP	protein_coding	38.5945	-1.77276	6.02614e-22	9.67822e-21
KCNN4	protein_coding	3292.06	-1.78151	8.39245e-32	3.35199e-30
CD1E	protein_coding	203.241	-1.78177	1.09286e-26	2.74574e-25
TMPRSS4	protein_coding	4656.74	-1.78648	5.41943e-24	1.05984e-22
LTB	protein_coding	682.45	-1.7901	3.88885e-30	1.34685e-28
SRPX2	protein_coding	221.919	-1.79619	7.81837e-46	1.12644e-43
CCNA1	protein_coding	154.04	-1.79675	4.48765e-43	4.91174e-41
DHRS9	protein_coding	190.553	-1.80046	3.03424e-35	1.62899e-33
CCN4	protein_coding	142.077	-1.80067	9.16658e-30	3.08048e-28
HES2	protein_coding	124.132	-1.80196	5.82428e-41	5.32942e-39
CTHRC1	protein_coding	979.526	-1.80224	2.3833e-34	1.19834e-32
XDH	protein_coding	203.549	-1.8139	1.8816e-20	2.61673e-19
EHF	protein_coding	825.339	-1.81518	7.47197e-44	8.63111e-42
LY6D	protein_coding	41.6436	-1.82291	6.76391e-14	5.10657e-13
VCAN	protein_coding	3102.69	-1.83419	8.76672e-37	5.37687e-35
CCN5	protein_coding	220.841	-1.84183	1.88619e-24	3.84604e-23
TERT	protein_coding	4.33601	-1.84377	2.25605e-08	9.35892e-08
STAC	protein_coding	412.698	-1.84493	1.9578e-47	3.20537e-45
COL3A1	protein_coding	39276.7	-1.84502	5.44228e-40	4.52235e-38
CHGB	protein_coding	1206	-1.84548	3.40388e-22	5.58679e-21
GREM1	protein_coding	343.446	-1.84678	1.36711e-23	2.56106e-22
KLK1	protein_coding	175.205	-1.84921	1.0206e-19	1.32581e-18
BEND6	protein_coding	159.354	-1.85024	5.59848e-54	1.68043e-51
SAA4	protein_coding	2.07115	-1.85153	3.42365e-12	2.16138e-11
FAP	protein_coding	468.751	-1.85178	2.47601e-45	3.35965e-43
CD70	protein_coding	140.007	-1.85543	2.71289e-24	5.43689e-23
WNT2	protein_coding	26.7661	-1.85773	1.12157e-19	1.45174e-18
MZB1	protein_coding	1258.47	-1.85784	1.23901e-14	1.00658e-13
P2RY6	protein_coding	428.886	-1.85859	2.6635e-84	9.59368e-81
IL4I1	protein_coding	369.269	-1.86206	5.93286e-43	6.44016e-41
SPRR3	protein_coding	5.27286	-1.86979	6.15132e-09	2.72041e-08
DMBX1	protein_coding	183.599	-1.87035	5.11767e-18	5.65915e-17
FAM83A	protein_coding	449.762	-1.87986	5.59223e-29	1.73644e-27
MMP10	protein_coding	18.1435	-1.8826	4.34983e-21	6.44279e-20
ACTBL2	protein_coding	73.5162	-1.89766	9.04992e-33	3.91876e-31
CACNG1	protein_coding	1.77873	-1.89786	8.33333e-25	1.76093e-23
FUT9	protein_coding	61.6236	-1.90315	1.60684e-12	1.05458e-11
CCL1	protein_coding	1.99522	-1.90369	5.16282e-16	4.77823e-15
CDKN2A	protein_coding	339.657	-1.908	3.96304e-55	1.31949e-52
APCDD1L	protein_coding	33.9703	-1.91077	3.27562e-27	8.64069e-26
CST5	protein_coding	73.4275	-1.91341	2.54201e-21	3.82663e-20
RP1	protein_coding	10.0231	-1.9245	2.1413e-24	4.34411e-23
DRP2	protein_coding	10.9114	-1.92947	2.93727e-26	7.09384e-25
MMP11	protein_coding	985.544	-1.93021	3.81491e-46	5.70379e-44
PDZK1IP1	protein_coding	3576.86	-1.93083	2.36042e-31	9.13301e-30
CA10	protein_coding	6.37115	-1.93429	6.508e-21	9.46946e-20
NRAP	protein_coding	3.67196	-1.93989	4.11414e-14	3.17689e-13
SLC28A3	protein_coding	166.007	-1.94365	2.32372e-49	4.6499e-47
WT1	protein_coding	11.3551	-1.94566	3.37666e-21	5.03905e-20
POSTN	protein_coding	7219.21	-1.94781	2.84929e-38	1.99808e-36
AMTN	protein_coding	11.0467	-1.95062	2.13353e-18	2.44525e-17
KCNJ6	protein_coding	12.2187	-1.95109	7.22077e-26	1.69186e-24
LOX	protein_coding	1756.37	-1.95579	7.15167e-58	2.89139e-55
TMEM40	protein_coding	31.7575	-1.95652	9.964e-27	2.51294e-25
CCL22	protein_coding	318.056	-1.957	1.95506e-35	1.06403e-33
GLRA3	protein_coding	1.75361	-1.95891	4.01536e-14	3.10303e-13
VGLL1	protein_coding	111.876	-1.959	9.56378e-21	1.36599e-19
MMP27	protein_coding	0.885913	-1.96757	7.37938e-10	3.62303e-09
SP8	protein_coding	1.1685	-1.9709	2.13849e-13	1.53467e-12
CHI3L1	protein_coding	27315.3	-1.97564	1.5465e-25	3.50738e-24
CD1B	protein_coding	43.859	-1.97689	1.49959e-24	3.08011e-23
ELANE	protein_coding	19.203	-1.97907	5.91292e-20	7.84844e-19
AZU1	protein_coding	29.6842	-1.9838	2.03891e-29	6.58919e-28
S100A2	protein_coding	1996.51	-1.9912	6.97906e-51	1.59128e-48
PITX3	protein_coding	19.4086	-1.99676	2.50122e-48	4.52516e-46
BIRC7	protein_coding	525.773	-1.9969	1.24254e-23	2.34321e-22
SORCS3	protein_coding	2.04411	-2.00907	1.46256e-09	6.92745e-09
GRP	protein_coding	45.0083	-2.02305	9.12774e-21	1.30796e-19
TMPRSS6	protein_coding	3772.41	-2.02588	1.68225e-26	4.15539e-25
SMCO2	protein_coding	5.99366	-2.02843	3.17974e-47	5.1633e-45
STEAP1	protein_coding	73.2975	-2.04051	2.43878e-42	2.5229e-40
MUC16	protein_coding	582.184	-2.04608	4.57226e-23	8.13094e-22
CD1A	protein_coding	390.779	-2.05081	3.59323e-23	6.43904e-22
CAPN8	protein_coding	105.65	-2.05139	1.43659e-47	2.39156e-45
FAM83E	protein_coding	25.9887	-2.05862	2.44984e-28	7.1847e-27
DAW1	protein_coding	23.6683	-2.06085	1.83794e-45	2.53732e-43
SPRR1A	protein_coding	1.59171	-2.06418	2.93599e-11	1.67763e-10
ADAMTS14	protein_coding	348.696	-2.06977	4.29677e-44	5.11238e-42
TMEM92	protein_coding	334.043	-2.07255	1.56426e-29	5.11805e-28
CXCL1	protein_coding	67.1642	-2.08188	3.45266e-39	2.68231e-37
MUC21	protein_coding	1299.1	-2.09029	1.48336e-24	3.04993e-23
S100B	protein_coding	531.615	-2.10705	1.15928e-35	6.43301e-34
SLC34A2	protein_coding	176172	-2.10837	1.31379e-38	9.58631e-37
C11orf86	protein_coding	7.9477	-2.1093	8.06472e-23	1.40023e-21
C2CD4B	protein_coding	248.297	-2.10973	3.99005e-50	8.49945e-48
TNFSF18	protein_coding	86.117	-2.12066	2.75467e-51	6.69588e-49
CCL11	protein_coding	4.23652	-2.12697	2.2502e-16	2.15403e-15
ADGRF2	protein_coding	28.3839	-2.13471	1.64227e-32	7.00412e-31
OR13A1	protein_coding	19.2942	-2.13553	1.94798e-40	1.70002e-38
IL22RA2	protein_coding	25.6721	-2.13686	7.4558e-22	1.18589e-20
PLPP4	protein_coding	73.3695	-2.1475	1.61831e-39	1.28238e-37
COL1A1	protein_coding	65430.5	-2.17383	2.91392e-46	4.38983e-44
LRRN4	protein_coding	23.1999	-2.17475	2.63346e-55	8.84239e-53
CCL7	protein_coding	11.705	-2.1834	3.81153e-34	1.85753e-32
FAM25A	protein_coding	0.624715	-2.19074	1.72605e-09	8.1137e-09
NKX3-2	protein_coding	30.6112	-2.19543	4.94253e-44	5.81092e-42
BPIFB1	protein_coding	23.3873	-2.20481	3.50675e-31	1.33726e-29
NLRP10	protein_coding	1.56785	-2.20848	1.43946e-20	2.02244e-19
IVL	protein_coding	441.974	-2.2094	2.25134e-22	3.75423e-21
ADAM12	protein_coding	577.878	-2.21485	1.43502e-50	3.17636e-48
PADI1	protein_coding	11.9322	-2.22064	1.50357e-36	8.93146e-35
C15orf48	protein_coding	875.623	-2.22129	2.39305e-79	5.57736e-76
AHNAK2	protein_coding	5309.19	-2.22354	6.99411e-74	1.10845e-70
SPON1	protein_coding	662.801	-2.22685	1.06068e-44	1.34696e-42
CACNG4	protein_coding	431.789	-2.22729	5.33864e-37	3.34687e-35
LIPK	protein_coding	1.96326	-2.24033	2.93413e-11	1.67681e-10
SFRP2	protein_coding	4955.19	-2.24188	8.40035e-27	2.12807e-25
FN1	protein_coding	933551	-2.25285	7.86072e-50	1.63063e-47
CXCL5	protein_coding	65.8023	-2.26376	1.08085e-30	3.92165e-29
HOXD1	protein_coding	53.7082	-2.26583	4.20951e-30	1.45537e-28
SDR16C5	protein_coding	100.076	-2.27	2.73226e-32	1.14434e-30
SERPINB10	protein_coding	1.82986	-2.273	2.52104e-17	2.62997e-16
SFN	protein_coding	2036	-2.28369	1.22161e-48	2.24081e-46
CYP26A1	protein_coding	26.6221	-2.28752	1.54193e-41	1.46155e-39
MUC1	protein_coding	8312.08	-2.29274	5.9247e-71	7.3357e-68
PODNL1	protein_coding	201.901	-2.29491	2.03456e-56	7.53378e-54
SERPINB2	protein_coding	28.4399	-2.30191	4.11539e-29	1.29204e-27
CEACAM8	protein_coding	6.0255	-2.30479	3.88574e-19	4.75322e-18
IGLL5	protein_coding	3629.92	-2.30654	1.17286e-19	1.51516e-18
B3GNT3	protein_coding	2766.36	-2.31187	7.78728e-41	7.06041e-39
PTPRN	protein_coding	18.237	-2.31898	1.2452e-47	2.09051e-45
EREG	protein_coding	149.131	-2.3237	3.74834e-26	8.98444e-25
ST6GALNAC5	protein_coding	962.909	-2.35494	4.76886e-37	3.00871e-35
HLA-G	protein_coding	1370.8	-2.36151	5.04641e-61	2.40896e-58
PTH	protein_coding	0.613495	-2.37025	0.00067719	0.00156449
SERPINA11	protein_coding	1.13981	-2.37093	2.31739e-15	2.00825e-14
PSG1	protein_coding	187.258	-2.37751	4.26753e-31	1.61339e-29
COL10A1	protein_coding	738.278	-2.39325	2.91453e-36	1.68579e-34
XKR4	protein_coding	62.274	-2.40178	4.41466e-48	7.70543e-46
MMP3	protein_coding	11.7187	-2.41341	1.72504e-20	2.40661e-19
MMP20	protein_coding	3.59187	-2.41564	5.34724e-32	2.18191e-30
IGFL3	protein_coding	2.15538	-2.42054	6.66365e-19	7.98369e-18
SLPI	protein_coding	7818.38	-2.44578	3.42527e-50	7.33582e-48
CCL20	protein_coding	137.889	-2.44656	1.06031e-51	2.69382e-49
C4orf17	protein_coding	2.17531	-2.45164	2.43467e-30	8.59753e-29
ADGRF4	protein_coding	73.5071	-2.46779	5.33709e-37	3.34687e-35
CCL17	protein_coding	283.751	-2.47634	6.61488e-44	7.70848e-42
SAA1	protein_coding	81.7598	-2.49519	1.75763e-32	7.48002e-31
SMPX	protein_coding	2.1047	-2.50078	3.34439e-24	6.64608e-23
ALOX5	protein_coding	5440.99	-2.51842	3.16894e-71	4.18522e-68
FRMD5	protein_coding	764.134	-2.52381	1.41657e-76	2.8063e-73
KRT75	protein_coding	3.57989	-2.53359	4.41436e-16	4.11242e-15
MCEMP1	protein_coding	147.801	-2.54595	1.00722e-42	1.07566e-40
CST4	protein_coding	100.678	-2.55818	7.13657e-39	5.35527e-37
SYT1	protein_coding	572.273	-2.56006	1.8118e-52	4.8178e-50
CXCL17	protein_coding	948.343	-2.57705	1.78804e-62	1.12652e-59
ARSI	protein_coding	90.8656	-2.57779	8.61015e-59	3.62918e-56
PSG4	protein_coding	47.4475	-2.58259	2.33219e-16	2.22821e-15
PLPPR1	protein_coding	20.3342	-2.59163	1.07367e-51	2.70955e-49
SAA2-SAA4	protein_coding	3.405	-2.59326	4.68735e-22	7.5896e-21
SFTPB	protein_coding	71945.3	-2.62768	5.42161e-42	5.38369e-40
PSG5	protein_coding	8.38328	-2.63662	1.10249e-31	4.36818e-30
FUT3	protein_coding	107.322	-2.66114	1.36185e-61	7.39147e-59
RETN	protein_coding	49.3531	-2.6664	1.91137e-42	1.99291e-40
HAS1	protein_coding	46.6485	-2.71464	2.4865e-35	1.34403e-33
C2CD4A	protein_coding	554.125	-2.72412	5.40114e-57	2.07766e-54
CEACAM6	protein_coding	997.732	-2.72933	8.00151e-41	7.23808e-39
CRCT1	protein_coding	1.39115	-2.73432	4.84714e-16	4.50078e-15
KERA	protein_coding	5.33606	-2.73882	8.4908e-22	1.33869e-20
WNT7A	protein_coding	43.093	-2.74728	3.92231e-46	5.84232e-44
IGFL1	protein_coding	7.83448	-2.7513	2.66403e-34	1.32769e-32
PLPPR5	protein_coding	2.27369	-2.79032	4.52714e-19	5.50383e-18
CST1	protein_coding	79.2008	-2.80606	6.40594e-22	1.02467e-20
LCN2	protein_coding	3400.6	-2.80659	4.46336e-68	4.53443e-65
PSG9	protein_coding	3.24161	-2.80726	1.97411e-27	5.32084e-26
RAB27B	protein_coding	513.113	-2.82206	1.44648e-62	9.39522e-60
IL36A	protein_coding	2.09391	-2.88221	1.0678e-31	4.23922e-30
SPRR2D	protein_coding	7.45518	-2.88467	2.93699e-20	4.00573e-19
SLC18A3	protein_coding	97.6501	-2.89304	2.20999e-23	4.05567e-22
LRRC15	protein_coding	578.485	-2.9169	1.15139e-39	9.27218e-38
CHAT	protein_coding	9.15418	-2.94406	4.60006e-20	6.1574e-19
TMPRSS11E	protein_coding	214.115	-2.98294	9.41717e-44	1.08464e-41
C1QL2	protein_coding	141.809	-3.00319	1.85799e-40	1.62506e-38
MARCHF11	protein_coding	21.6063	-3.02645	3.07397e-45	4.1286e-43
PSG3	protein_coding	3.48229	-3.03912	5.18924e-30	1.7863e-28
MYL1	protein_coding	1.70824	-3.07705	1.54547e-07	5.80078e-07
SLC6A14	protein_coding	251.007	-3.13513	7.02997e-68	6.96336e-65
SPRR1B	protein_coding	33.0108	-3.15384	5.38019e-31	2.01482e-29
MMP7	protein_coding	1431.66	-3.18539	5.30596e-53	1.44984e-50
CST2	protein_coding	279.259	-3.20589	2.61579e-48	4.71092e-46
VTCN1	protein_coding	455.214	-3.20682	5.2022e-49	9.90944e-47
METTL11B	protein_coding	1.69524	-3.23224	1.19976e-19	1.54588e-18
SAA2	protein_coding	56.5625	-3.25672	6.51347e-49	1.22308e-46
PSG6	protein_coding	5.46262	-3.30775	4.47628e-35	2.36789e-33
COL11A1	protein_coding	926.863	-3.38775	3.78959e-45	5.0385e-43
MYH2	protein_coding	4.05262	-3.57691	5.09338e-14	3.89209e-13
PSG8	protein_coding	218.32	-3.61129	1.88905e-39	1.48504e-37
CD177	protein_coding	517.824	-3.65701	2.05757e-46	3.12349e-44
MMP13	protein_coding	167.224	-3.73037	2.38929e-31	9.22671e-30
EPYC	protein_coding	53.3423	-3.82	1.00115e-35	5.57901e-34
IL37	protein_coding	12.9162	-4.16376	1.25228e-56	4.68081e-54

## Sheet: Analysis of low-expressed genes
ONTOLOGY	ID	Description	GeneRatio	pvalue	p.adjust	geneID	Count
BP	GO:0097530	granulocyte migration	45/800	1.33205e-25	6.16739e-22	TGFB2/SLAMF8/CKLF/PRTN3/ADAM8/SCG2/HRH1/LGALS3/XCL2/CXCL3/RAC2/CCL19/DPP4/ITGB2/TNFAIP6/CCL24/CXCL13/JAML/XG/CXCL9/CXCL6/CD74/NOD2/CXCL10/TREM1/CCL23/IL17A/S100A8/CXCL8/CXCL11/S100A9/CCL13/LBP/PPBP/CCL1/CCL22/CXCL1/CCL11/CCL7/CXCL5/CCL20/CCL17/SAA1/CXCL17/CD177	45
BP	GO:1990266	neutrophil migration	41/800	3.6794e-25	8.51782e-22	TGFB2/SLAMF8/CKLF/PRTN3/ADAM8/LGALS3/XCL2/CXCL3/RAC2/CCL19/DPP4/ITGB2/TNFAIP6/CCL24/CXCL13/JAML/XG/CXCL9/CXCL6/CD74/NOD2/CXCL10/TREM1/CCL23/S100A8/CXCL8/CXCL11/S100A9/CCL13/LBP/PPBP/CCL1/CCL22/CXCL1/CCL11/CCL7/CXCL5/CCL20/CCL17/SAA1/CD177	41
BP	GO:0097529	myeloid leukocyte migration	53/800	1.38525e-24	2.1379e-21	TGFB2/SPI1/SLAMF8/CKLF/PRTN3/ADAM8/PTPRO/SCG2/HRH1/LGALS3/XCL2/CXCL3/RAC2/CCR2/CCL19/DPP4/ITGB2/TNFAIP6/CCL24/CXCL13/JAML/XG/CXCL9/CXCL6/CD74/NOD2/CXCL10/TREM1/CCL23/TNFSF11/IL17A/NBL1/S100A8/CXCL8/CXCL11/S100A9/CCL13/FPR2/LBP/PPBP/GREM1/CCL1/CCL22/AZU1/CXCL1/CCL11/CCL7/CXCL5/CCL20/CCL17/SAA1/CXCL17/CD177	53
BP	GO:0030593	neutrophil chemotaxis	36/800	3.08723e-23	3.38662e-20	TGFB2/CKLF/LGALS3/XCL2/CXCL3/RAC2/CCL19/DPP4/ITGB2/TNFAIP6/CCL24/CXCL13/JAML/CXCL9/CXCL6/CD74/NOD2/CXCL10/TREM1/CCL23/S100A8/CXCL8/CXCL11/S100A9/CCL13/LBP/PPBP/CCL1/CCL22/CXCL1/CCL11/CCL7/CXCL5/CCL20/CCL17/SAA1	36
BP	GO:0071621	granulocyte chemotaxis	39/800	4.30593e-23	3.38662e-20	TGFB2/CKLF/SCG2/HRH1/LGALS3/XCL2/CXCL3/RAC2/CCL19/DPP4/ITGB2/TNFAIP6/CCL24/CXCL13/JAML/CXCL9/CXCL6/CD74/NOD2/CXCL10/TREM1/CCL23/S100A8/CXCL8/CXCL11/S100A9/CCL13/LBP/PPBP/CCL1/CCL22/CXCL1/CCL11/CCL7/CXCL5/CCL20/CCL17/SAA1/CXCL17	39
BP	GO:0030595	leukocyte chemotaxis	52/800	4.38871e-23	3.38662e-20	TGFB2/SPI1/SLAMF8/CKLF/ADAM8/PTPRO/SCG2/HRH1/LGALS3/XCL2/CXCL3/RAC2/CCR2/CCR6/CCL19/DPP4/ITGB2/TNFAIP6/CCL24/CXCL13/JAML/CXCL9/CXCL6/CD74/NOD2/CXCL10/TREM1/CCL23/TNFSF11/NBL1/CH25H/S100A8/CXCL8/CXCL11/S100A9/CCL13/FPR2/LBP/PPBP/GREM1/CCL1/CCL22/AZU1/CXCL1/CCL11/CCL7/CXCL5/CCL20/CCL17/SAA1/ALOX5/CXCL17	52
BP	GO:0050900	leukocyte migration	66/800	1.38441e-22	9.1569e-20	TGFB2/SPI1/SLAMF8/CKLF/PRTN3/ADAM8/PTPRO/SCG2/HRH1/LGALS3/XCL2/CXCL3/RAC2/CCR2/CCR6/CCL19/ITGA3/DPP4/ITGB2/TNFAIP6/CCL24/HCK/ICAM1/SPN/CXCL13/JAML/XG/CXCL9/CXCL6/CD74/NOD2/CXCL10/TREM1/CCL23/TNFSF11/IL17A/NBL1/CH25H/S100A8/TNFRSF18/CXCL8/MYO1G/CXCL11/S100A9/ITGA2/CCL13/FPR2/LBP/PPBP/GREM1/FUT9/CCL1/CCL22/ELANE/AZU1/CXCL1/TNFSF18/CCL11/CCL7/CXCL5/CCL20/CCL17/SAA1/ALOX5/CXCL17/CD177	66
BP	GO:0022407	regulation of cell-cell adhesion	72/800	2.63709e-22	1.52622e-19	FCGR2B/SPI1/ADAM8/IL12B/LGALS3/CD274/ICOS/IL2RA/CLEC4G/IL18/SIRPG/CCR2/LAX1/CCL19/DPP4/ITGB2/PTPRU/FCHO1/SPN/EFNA5/CXCL13/FOXA1/CARD11/MEGF10/TIGIT/IFNG/LAG3/HLA-DMA/CTLA4/IFNL1/CD74/IL2/HLA-DOB/RUNX1/CD80/FGG/NOD2/EPHB3/HLA-DPB1/HLA-DRA/PLAUR/HLA-DQA1/HLA-DRB1/PDCD1LG2/CDSN/FGB/TNFSF4/CD55/CEACAM1/TNFSF11/HLA-DQB1/HLA-DPA1/EBI3/ABCA12/FOXP3/TNFSF9/HLA-DRB5/GPNMB/HLA-DOA/HLA-DQA2/HLA-DQB2/IL1RN/C…	72
BP	GO:0060326	cell chemotaxis	57/800	9.41975e-21	4.84594e-18	TGFB2/SPI1/SLAMF8/CKLF/ADAM8/PTPRO/SCG2/HRH1/LGALS3/XCL2/CXCL14/MET/CXCL3/RAC2/CCR2/CCR6/CCL19/DPP4/ITGB2/TNFAIP6/CCL24/CXCL13/JAML/CXCL9/CXCL6/CD74/NOD2/CXCL10/TREM1/CCL23/TNFSF11/NBL1/CH25H/S100A8/CXCL8/CXCL11/CCR8/CCR9/S100A9/CCL13/FPR2/LBP/PPBP/GREM1/CCL1/LOX/CCL22/AZU1/CXCL1/CCL11/CCL7/CXCL5/CCL20/CCL17/SAA1/ALOX5/CXCL17	57
BP	GO:0007159	leukocyte cell-cell adhesion	63/800	1.07351e-20	4.97034e-18	FCGR2B/ADAM8/IL12B/LGALS3/CD274/ICOS/IL2RA/CLEC4G/IL18/SIRPG/RAC2/CCR2/LAX1/NT5E/CCL19/DPP4/ITGB2/FCHO1/ICAM1/SPN/CARD11/TIGIT/IFNG/LAG3/HLA-DMA/CTLA4/IFNL1/CD74/IL2/HLA-DOB/RUNX1/CD80/NOD2/HLA-DPB1/HLA-DRA/HLA-DQA1/HLA-DRB1/PDCD1LG2/TNFSF4/OLR1/CD55/CEACAM1/TNFSF11/HLA-DQB1/HLA-DPA1/EBI3/S100A8/FOXP3/TNFSF9/HLA-DRB5/S100A9/GPNMB/HLA-DOA/HLA-DQA2/HLA-DQB2/CD70/IL4I1/FUT9/ELANE/HLA-G/ALOX5/VTCN1/C…	63
BP	GO:0050863	regulation of T cell activation	59/800	2.23594e-20	9.41129e-18	FCGR2B/SIT1/ADAM8/IL12B/LGALS3/CD274/ICOS/IL2RA/CLEC4G/IL18/SIRPG/RAC2/CCR2/LAX1/CCL19/DPP4/CD2/ZNF683/FCHO1/SPN/CARD11/TIGIT/IFNG/LAG3/HLA-DMA/CTLA4/IFNL1/CD74/IL2/HLA-DOB/RUNX1/CD80/NOD2/HLA-DPB1/HLA-DRA/HLA-DQA1/HLA-DRB1/PDCD1LG2/TNFSF4/CD55/CEACAM1/TNFSF11/HLA-DQB1/HLA-DPA1/EBI3/CLC/FOXP3/TNFSF9/HLA-DRB5/GPNMB/HLA-DOA/HLA-DQA2/HLA-DQB2/CD70/IL4I1/TNFSF18/HLA-G/PSG9/VTCN1	59
BP	GO:0045785	positive regulation of cell adhesion	68/800	2.93427e-20	1.13214e-17	TGFB2/ADAM8/IL12B/CD274/ICOS/IL2RA/IL18/SIRPG/CCR2/CCL19/ITGA3/DPP4/EGFL6/ITGB2/PTPRU/FCHO1/CXCL13/FOXA1/CARD11/MEGF10/IFNG/HLA-DMA/IBSP/CD74/IL2/HLA-DOB/RUNX1/CD80/FGG/NOD2/SPOCK2/HLA-DPB1/HLA-DRA/PLAUR/HLA-DQA1/HLA-DRB1/PDCD1LG2/FGB/TNFSF4/CD55/TNFSF11/HLA-DQB1/HLA-DPA1/EBI3/FOXP3/TGM2/TNFRSF18/TNFSF9/S100A10/HLA-DRB5/HLA-DOA/ITGA2/HLA-DQA2/HLA-DQB2/CD70/IL4I1/ELANE/AZU1/TNFSF18/SFRP2/FN1/HLA-G…	68
BP	GO:0022409	positive regulation of cell-cell adhesion	53/800	1.66403e-19	5.92652e-17	ADAM8/IL12B/CD274/ICOS/IL2RA/IL18/SIRPG/CCR2/CCL19/DPP4/ITGB2/PTPRU/FCHO1/CXCL13/FOXA1/CARD11/MEGF10/IFNG/HLA-DMA/CD74/IL2/HLA-DOB/RUNX1/CD80/FGG/NOD2/HLA-DPB1/HLA-DRA/PLAUR/HLA-DQA1/HLA-DRB1/PDCD1LG2/FGB/TNFSF4/CD55/TNFSF11/HLA-DQB1/HLA-DPA1/EBI3/FOXP3/TNFSF9/HLA-DRB5/HLA-DOA/HLA-DQA2/HLA-DQB2/CD70/IL4I1/ELANE/HLA-G/ALOX5/FUT3/CEACAM6/VTCN1	53
BP	GO:0006959	humoral immune response	55/800	3.46383e-19	1.14554e-16	FCGR2B/CFHR1/CR1L/PRTN3/C1R/CXCL14/CXCL3/CCR2/CCR6/C1S/C3/CXCL13/DEFB1/IFNG/C2/PRSS3/CXCL9/KLK7/CRP/CFH/CXCL6/NOD2/CXCL10/TREM1/MUC7/RNASE3/HLA-DRB1/LYZ/FGB/PI3/CD55/IL17A/JCHAIN/HLA-DQB1/EBI3/CXCL8/LTA/CXCL11/WFDC10B/IL36RN/S100A9/GNLY/CFB/FCN1/CCL13/IGLL1/KRT6A/PPBP/ELANE/AZU1/CXCL1/CXCL5/IGLL5/SLPI/ALOX5	55
BP	GO:0002443	leukocyte mediated immunity	67/800	4.78953e-19	1.47837e-16	FCGR2B/SLA2/SPI1/CR1L/GZMB/IL12B/MILR1/C1R/ITGAM/CLEC4G/IL18/RAC2/CCR2/CCR6/C1S/RSAD2/NCR3/ITGB2/HLA-B/ANXA3/C3/ICAM1/SERPINB4/MRGPRX2/CTSC/LAG3/C2/HLA-DMA/CRP/CXCL6/CD74/IL2/HLA-DOB/NOD2/TREM1/HLA-DPB1/HLA-DRA/HLA-DQA1/SLAMF7/HLA-DRB1/TNFSF4/CD55/CEACAM1/HLA-DQB1/BATF/HLA-DPA1/CLC/FOXP3/MYO1G/LTA/SLAMF9/HLA-DRB5/HLA-DOA/HLA-DQA2/IGLL1/HLA-DQB2/CD1C/CD1E/CD70/IL4I1/CD1B/ELANE/AZU1/CD1A/IGLL5/HLA-…	67
BP	GO:0002460	adaptive immune response based on somatic recombination of immune receptors built from immunoglobulin superfamily domains	59/800	1.15606e-18	3.34535e-16	FCGR2B/SLA2/CR1L/IL12B/C1R/CD274/CLEC4G/IL18/CCR2/CCR6/C1S/CCL19/RSAD2/HLA-B/C3/ICAM1/SPN/CXCL13/CTSC/C2/HLA-DMA/CRP/CD74/IL2/HLA-DOB/CD80/NOD2/HLA-DPB1/HLA-DRA/HLA-DQA1/HLA-DRB1/CLEC6A/TNFSF4/CD55/CEACAM1/HLA-DQB1/BATF/HLA-DPA1/EBI3/CLC/FOXP3/MYO1G/LTA/IL1RL1/HLA-DRB5/HLA-DOA/HLA-DQA2/IGLL1/HLA-DQB2/CD1C/CD1E/CD70/IL4I1/CD1B/CD1A/NLRP10/IGLL5/HLA-G/PSG9	59
BP	GO:1903037	regulation of leukocyte cell-cell adhesion	56/800	3.42059e-18	9.31607e-16	FCGR2B/ADAM8/IL12B/LGALS3/CD274/ICOS/IL2RA/CLEC4G/IL18/SIRPG/CCR2/LAX1/CCL19/DPP4/ITGB2/FCHO1/SPN/CARD11/TIGIT/IFNG/LAG3/HLA-DMA/CTLA4/IFNL1/CD74/IL2/HLA-DOB/RUNX1/CD80/NOD2/HLA-DPB1/HLA-DRA/HLA-DQA1/HLA-DRB1/PDCD1LG2/TNFSF4/CD55/CEACAM1/TNFSF11/HLA-DQB1/HLA-DPA1/EBI3/FOXP3/TNFSF9/HLA-DRB5/GPNMB/HLA-DOA/HLA-DQA2/HLA-DQB2/CD70/IL4I1/FUT9/ELANE/HLA-G/ALOX5/VTCN1	56
BP	GO:0019730	antimicrobial humoral response	32/800	4.82499e-17	1.24109e-14	PRTN3/CXCL14/CXCL3/CXCL13/DEFB1/PRSS3/CXCL9/KLK7/CXCL6/NOD2/CXCL10/MUC7/RNASE3/LYZ/FGB/PI3/IL17A/JCHAIN/CXCL8/CXCL11/WFDC10B/IL36RN/S100A9/GNLY/CCL13/KRT6A/PPBP/ELANE/AZU1/CXCL1/CXCL5/SLPI	32
BP	GO:0019221	cytokine-mediated signaling pathway	65/800	1.85037e-16	4.50906e-14	SPI1/IL1RAPL2/PYDC1/IL12B/XCL2/OSM/OASL/IL2RA/IL18/CXCL3/CCR2/CCR6/CRLF1/CCL19/ISG15/CCL24/HCK/CXCL13/OSMR/CD300LF/IL31RA/IFNG/CXCL9/ZBP1/IL2RG/CXCL6/CD74/CXCL10/MMP12/TNFRSF17/CCL23/CEACAM1/TNFSF11/IL17A/BIRC3/EBI3/CRLF2/TNFRSF18/CXCL8/IL1RL1/IL1F10/CXCL11/CCR8/CCR9/IL36RN/CSF2/IL36G/CCL13/IL1RN/PPBP/CD70/CCL1/CCL22/BIRC7/CXCL1/TNFSF18/CCL11/IL22RA2/CCL7/CXCL5/EREG/CCL20/CCL17/IL36A/IL37	65
BP	GO:0001819	positive regulation of cytokine production	64/800	2.21555e-16	5.129e-14	CYBB/ADAM8/PTGS2/PYDC1/IL12B/CD274/OSM/GBP5/IL18/CCR2/CCL19/MNDA/RSAD2/TRIM15/ISG15/CLEC5A/CD2/C3/HPSE/SPN/ADRA2A/CARD11/TIGIT/IFNG/INAVA/IFNL1/CD74/IL2/RUNX1/CD80/NOD2/HLA-DPB1/MMP12/IL26/CLEC6A/TNFSF4/CD55/IL17A/BATF/HLA-DPA1/EBI3/CRLF2/FOXP3/LTA/IL1RL1/SERPINB7/CSF2/FCN1/PAEP/ALOX15B/LBP/LUM/LTB/CCL1/CHI3L1/ELANE/AZU1/NLRP10/EREG/HLA-G/SAA1/CXCL17/IL36A/VTCN1	64
BP	GO:1903039	positive regulation of leukocyte cell-cell adhesion	44/800	3.66478e-16	7.77816e-14	ADAM8/IL12B/CD274/ICOS/IL2RA/IL18/SIRPG/CCR2/CCL19/DPP4/ITGB2/FCHO1/CARD11/IFNG/HLA-DMA/CD74/IL2/HLA-DOB/RUNX1/CD80/NOD2/HLA-DPB1/HLA-DRA/HLA-DQA1/HLA-DRB1/PDCD1LG2/TNFSF4/CD55/TNFSF11/HLA-DQB1/HLA-DPA1/EBI3/FOXP3/TNFSF9/HLA-DRB5/HLA-DOA/HLA-DQA2/HLA-DQB2/CD70/IL4I1/ELANE/HLA-G/ALOX5/VTCN1	44
BP	GO:0032103	positive regulation of response to external stimulus	61/800	3.69589e-16	7.77816e-14	SPI1/CREB3L3/ADAM8/SCG2/PTGS2/IL12B/XCL2/OSM/OASL/GBP5/MET/IL18/RAC2/CCR2/CCR6/CCL19/MNDA/TRIM15/NCR3/FGF10/C3/CCL24/HCK/CXCL13/OSMR/CTSC/IFNG/LAG3/KLK7/ZBP1/CD74/IL2/NOD2/CXCL10/MMP12/CLEC6A/TNFSF4/TNFSF11/IL17A/ALOX5AP/LDLR/S100A8/CXCL8/LTA/IL1RL1/S100A9/PLA2G2A/ITGA2/FCN1/FPR2/LBP/CCN4/CCL1/AZU1/C2CD4B/CCL7/NLRP10/EREG/HLA-G/CXCL17/C2CD4A	61
BP	GO:0002683	negative regulation of immune system process	59/800	8.77127e-16	1.76569e-13	FCGR2B/TNFRSF13B/TGFB2/SLA2/SPI1/SLAMF8/CR1L/CST7/IL12B/LGALS3/MILR1/TMEM176B/CD274/IL2RA/CLEC4G/CCR2/LAX1/GPR68/MNDA/TMEM176A/DPP4/ISG15/HLA-B/TNFAIP6/HCK/SPN/SERPINB4/CD300LF/IL31RA/TIGIT/LAG3/CTLA4/LST1/IFNL1/CD74/IL2/HLA-DOB/RUNX1/CD80/NOD2/MMP12/HLA-DRB1/PDCD1LG2/TNFSF4/CD55/CEACAM1/NBL1/LDLR/FCRLB/FOXP3/IL1RL1/INHBA/GPNMB/HLA-DOA/COL3A1/GREM1/IL4I1/HLA-G/VTCN1	59
BP	GO:0002449	lymphocyte mediated immunity	54/800	9.87052e-16	1.90419e-13	FCGR2B/SLA2/CR1L/GZMB/IL12B/C1R/CLEC4G/IL18/CCR2/CCR6/C1S/RSAD2/NCR3/HLA-B/C3/ICAM1/SERPINB4/CTSC/LAG3/C2/HLA-DMA/CRP/CD74/IL2/HLA-DOB/NOD2/HLA-DPB1/HLA-DRA/HLA-DQA1/SLAMF7/HLA-DRB1/TNFSF4/CD55/CEACAM1/HLA-DQB1/BATF/HLA-DPA1/CLC/FOXP3/MYO1G/LTA/HLA-DRB5/HLA-DOA/HLA-DQA2/IGLL1/HLA-DQB2/CD1C/CD1E/CD70/IL4I1/CD1B/CD1A/IGLL5/HLA-G	54
BP	GO:0043588	skin development	48/800	1.07777e-15	1.99603e-13	TGFB2/LGR5/KRT5/WNT10A/MET/FST/ITGA3/FGF10/HPSE/ITGB4/WNT16/COL5A2/PPL/KRT6B/AQP3/FOXQ1/SPRR2A/ITGB6/GRHL3/CDSN/LCE1B/ABCA12/CSTA/COMP/KRT80/LCE1C/KRT16/COL5A1/INHBA/COL1A2/KRT79/ITGA2/CDH11/KRT17/ALOX15B/KRT6A/LTB/COL3A1/SPRR3/SPRR1A/COL1A1/IVL/LIPK/SFN/EREG/KRT75/SPRR2D/SPRR1B	48
BP	GO:0050870	positive regulation of T cell activation	41/800	1.62967e-15	2.90207e-13	ADAM8/IL12B/CD274/ICOS/IL2RA/IL18/SIRPG/CCR2/CCL19/DPP4/FCHO1/CARD11/IFNG/HLA-DMA/CD74/IL2/HLA-DOB/RUNX1/CD80/NOD2/HLA-DPB1/HLA-DRA/HLA-DQA1/HLA-DRB1/PDCD1LG2/TNFSF4/CD55/TNFSF11/HLA-DQB1/HLA-DPA1/EBI3/FOXP3/TNFSF9/HLA-DRB5/HLA-DOA/HLA-DQA2/HLA-DQB2/CD70/IL4I1/HLA-G/VTCN1	41
BP	GO:0019884	antigen processing and presentation of exogenous antigen	19/800	1.63597e-14	2.77258e-12	FCGR2B/HLA-DMA/CD74/HLA-DOB/HLA-DPB1/HLA-DRA/HLA-DQA1/HLA-DRB1/HLA-DQB1/HLA-DPA1/CTSE/HLA-DRB5/HLA-DOA/HLA-DQA2/HLA-DQB2/CD1C/CD1E/CD1B/CD1A	19
BP	GO:0002697	regulation of immune effector process	51/800	1.67672e-14	2.77258e-12	FCGR2B/TGFB2/SPI1/SLAMF8/CR1L/IL12B/LGALS3/ITGAM/CLEC4G/IL18/RAC2/CCR2/CCL19/RSAD2/NCR3/ITGB2/HLA-B/ZNF683/C3/ICAM1/SERPINB4/IFNG/LAG3/KLK7/INAVA/CFH/IFNL1/CXCL6/CD74/IL2/CD80/NOD2/HLA-DRA/HLA-DRB1/TNFSF4/CD55/CEACAM1/IL17A/CLC/FOXP3/LTA/FCN1/CD1C/LBP/CD1E/MZB1/IL4I1/CD1B/CD1A/HLA-G/CD177	51
BP	GO:0030198	extracellular matrix organization	47/800	2.03347e-14	3.24654e-12	TGFB2/ADAM8/CTSK/COL8A2/COL24A1/FBLN1/LAMB3/DPP4/EGFL6/COL5A2/COL12A1/KLK7/IBSP/RUNX1/MMP16/SERPINB5/LCP1/SPOCK2/MMP12/ZNF469/COMP/COL5A1/ELF3/COL6A5/COL1A2/LUM/COL3A1/GREM1/FAP/MMP10/MMP11/WT1/POSTN/LOX/MMP27/ELANE/TMPRSS6/ADAMTS14/COL1A1/SFRP2/COL10A1/MMP3/MMP20/HAS1/MMP7/COL11A1/MMP13	47
BP	GO:0043062	extracellular structure organization	47/800	2.30458e-14	3.37015e-12	TGFB2/ADAM8/CTSK/COL8A2/COL24A1/FBLN1/LAMB3/DPP4/EGFL6/COL5A2/COL12A1/KLK7/IBSP/RUNX1/MMP16/SERPINB5/LCP1/SPOCK2/MMP12/ZNF469/COMP/COL5A1/ELF3/COL6A5/COL1A2/LUM/COL3A1/GREM1/FAP/MMP10/MMP11/WT1/POSTN/LOX/MMP27/ELANE/TMPRSS6/ADAMTS14/COL1A1/SFRP2/COL10A1/MMP3/MMP20/HAS1/MMP7/COL11A1/MMP13	47
BP	GO:0070098	chemokine-mediated signaling pathway	25/800	2.31283e-14	3.37015e-12	XCL2/CXCL3/CCR2/CCR6/CCL19/CCL24/CXCL13/CXCL9/CXCL6/CXCL10/CCL23/CXCL8/CXCL11/CCR8/CCR9/CCL13/PPBP/CCL1/CCL22/CXCL1/CCL11/CCL7/CXCL5/CCL20/CCL17	25
BP	GO:1990868	response to chemokine	26/800	2.40205e-14	3.37015e-12	XCL2/CXCL3/CCR2/CCR6/CCL19/CCL24/CXCL13/CXCL9/CXCL6/CXCL10/CCL23/CXCL8/CXCL11/CCR8/CCR9/CCL13/PPBP/CCL1/LOX/CCL22/CXCL1/CCL11/CCL7/CXCL5/CCL20/CCL17	26
BP	GO:1990869	cellular response to chemokine	26/800	2.40205e-14	3.37015e-12	XCL2/CXCL3/CCR2/CCR6/CCL19/CCL24/CXCL13/CXCL9/CXCL6/CXCL10/CCL23/CXCL8/CXCL11/CCR8/CCR9/CCL13/PPBP/CCL1/LOX/CCL22/CXCL1/CCL11/CCL7/CXCL5/CCL20/CCL17	26
BP	GO:0045229	external encapsulating structure organization	47/800	2.95488e-14	4.02385e-12	TGFB2/ADAM8/CTSK/COL8A2/COL24A1/FBLN1/LAMB3/DPP4/EGFL6/COL5A2/COL12A1/KLK7/IBSP/RUNX1/MMP16/SERPINB5/LCP1/SPOCK2/MMP12/ZNF469/COMP/COL5A1/ELF3/COL6A5/COL1A2/LUM/COL3A1/GREM1/FAP/MMP10/MMP11/WT1/POSTN/LOX/MMP27/ELANE/TMPRSS6/ADAMTS14/COL1A1/SFRP2/COL10A1/MMP3/MMP20/HAS1/MMP7/COL11A1/MMP13	47
BP	GO:0070663	regulation of leukocyte proliferation	42/800	3.44267e-14	4.55417e-12	FCGR2B/TNFRSF13B/IL12B/LGALS3/CD274/IL2RA/CLEC4G/IL18/RAC2/CCR2/CCL19/MNDA/FGF10/SPN/CARD11/CRP/CTLA4/LST1/CD74/IL2/CD80/HLA-DPB1/HLA-DRB1/PDCD1LG2/TNFSF4/CD55/HLA-DPA1/EBI3/CLC/FOXP3/TNFSF9/GPNMB/CSF2/OCSTAMP/GREM1/CD70/MZB1/IL4I1/TNFSF18/HLA-G/PTH/VTCN1	42
BP	GO:0002399	MHC class II protein complex assembly	12/800	5.06067e-14	6.33267e-12	HLA-DMA/HLA-DOB/HLA-DPB1/HLA-DRA/HLA-DQA1/HLA-DRB1/HLA-DQB1/HLA-DPA1/HLA-DRB5/HLA-DOA/HLA-DQA2/HLA-DQB2	12
BP	GO:0002503	peptide antigen assembly with MHC class II protein complex	12/800	5.06067e-14	6.33267e-12	HLA-DMA/HLA-DOB/HLA-DPB1/HLA-DRA/HLA-DQA1/HLA-DRB1/HLA-DQB1/HLA-DPA1/HLA-DRB5/HLA-DOA/HLA-DQA2/HLA-DQB2	12
BP	GO:0050727	regulation of inflammatory response	53/800	9.88172e-14	1.20401e-11	FCGR2B/SLAMF8/CREB3L3/ADAM8/PTGS2/CST7/IL12B/C1QTNF12/OSM/PROC/IL2RA/IL18/CCR2/NT5E/C3/TNFAIP6/CCL24/HCK/OSMR/CTSC/IFNG/ZBP1/IL2/NOD2/FFAR4/HLA-DRB1/TNFSF4/TNFSF11/PTGES/BIRC3/ALOX5AP/LDLR/S100A8/FOXP3/LTA/IL1RL1/S100A9/PLA2G2A/ITGA2/FPR2/LBP/CCN4/CCL1/ELANE/C2CD4B/IL22RA2/NLRP10/MMP3/SAA1/ALOX5/CXCL17/C2CD4A/IL37	53
BP	GO:0031349	positive regulation of defense response	44/800	1.71557e-13	2.03669e-11	SPI1/CREB3L3/ADAM8/PTGS2/IL12B/OSM/GBP5/IL18/CCR2/MNDA/NCR3/C3/CCL24/HCK/OSMR/CTSC/IFNG/LAG3/KLK7/ZBP1/IL2/NOD2/MMP12/CLEC6A/TNFSF4/TNFSF11/ALOX5AP/LDLR/S100A8/LTA/IL1RL1/S100A9/PLA2G2A/ITGA2/FCN1/FPR2/LBP/CCN4/CCL1/C2CD4B/NLRP10/EREG/HLA-G/C2CD4A	44
BP	GO:0019886	antigen processing and presentation of exogenous peptide antigen via MHC class II	15/800	2.03978e-13	2.36104e-11	FCGR2B/HLA-DMA/CD74/HLA-DOB/HLA-DPB1/HLA-DRA/HLA-DQA1/HLA-DRB1/HLA-DQB1/HLA-DPA1/CTSE/HLA-DRB5/HLA-DOA/HLA-DQA2/HLA-DQB2	15
BP	GO:0002695	negative regulation of leukocyte activation	35/800	2.97647e-13	3.36124e-11	FCGR2B/TNFRSF13B/SPI1/CST7/LGALS3/MILR1/CD274/IL2RA/CLEC4G/CCR2/LAX1/MNDA/SPN/CD300LF/IL31RA/TIGIT/LAG3/CTLA4/LST1/IFNL1/CD74/IL2/RUNX1/CD80/HLA-DRB1/PDCD1LG2/TNFSF4/CEACAM1/LDLR/FOXP3/INHBA/GPNMB/IL4I1/HLA-G/VTCN1	35
BP	GO:0002696	positive regulation of leukocyte activation	54/800	4.07733e-13	4.49477e-11	ADAM8/IL12B/SPACA3/CD274/ICOS/IL2RA/ITGAM/IL18/SIRPG/CCR2/CCL19/DPP4/ITGB2/FGF10/CD2/FCHO1/CARD11/CTSC/IFNG/HLA-DMA/CLEC4D/CD74/IL2/HLA-DOB/RUNX1/CD80/NOD2/HLA-DPB1/HLA-DRA/HLA-DQA1/HLA-DRB1/PDCD1LG2/TNFSF4/CD55/TNFSF11/HLA-DQB1/HLA-DPA1/EBI3/CRLF2/FOXP3/IL1RL1/TNFSF9/HLA-DRB5/HLA-DOA/HLA-DQA2/IGLL1/HLA-DQB2/LBP/CD70/IL4I1/IGLL5/HLA-G/VTCN1/CD177	54
BP	GO:0050729	positive regulation of inflammatory response	30/800	4.27732e-13	4.60229e-11	CREB3L3/ADAM8/PTGS2/IL12B/OSM/IL18/CCR2/C3/CCL24/OSMR/CTSC/IFNG/ZBP1/IL2/TNFSF4/TNFSF11/ALOX5AP/LDLR/S100A8/LTA/IL1RL1/S100A9/PLA2G2A/ITGA2/LBP/CCN4/CCL1/C2CD4B/NLRP10/C2CD4A	30
BP	GO:0001906	cell killing	34/800	4.37367e-13	4.60229e-11	FCGR2B/SPI1/CR1L/GZMB/IL12B/ITGAM/IL18/NCR3/HLA-B/C3/ICAM1/SERPINB4/CTSC/IFNG/LAG3/CFH/CXCL6/TREM1/MUC7/HLA-DRA/SLAMF7/HLA-DRB1/LYZ/CD55/CEACAM1/GNLY/CCL13/CD1C/CD1E/CD1B/ELANE/AZU1/CD1A/HLA-G	34
BP	GO:0010951	negative regulation of endopeptidase activity	40/800	4.88499e-13	5.02611e-11	PTGS2/CST7/SPINK7/SPOCK3/TFPI2/RARRES1/ANXA2/SPINK2/C3/CST6/SERPINB4/SERPINA6/NLRP7/SERPINA9/SERPINB5/CARD17/SPOCK2/PROS1/PLAUR/PI3/COL6A3/OPRPN/BIRC3/SERPINA1/CSTA/SERPINA12/SERPINB7/WFDC10B/ANXA8/CST5/BIRC7/SFRP2/SERPINB10/SFN/SERPINB2/SERPINA11/SLPI/CST4/CST1/CST2	40
BP	GO:0002548	monocyte chemotaxis	21/800	6.67498e-13	6.71851e-11	SLAMF8/PTPRO/LGALS3/XCL2/CCR2/CCL19/CCL24/CXCL10/CCL23/TNFSF11/NBL1/CCL13/FPR2/GREM1/CCL1/CCL22/CCL11/CCL7/CCL20/CCL17/CXCL17	21
BP	GO:0071674	mononuclear cell migration	35/800	7.57326e-13	7.46047e-11	SPI1/SLAMF8/CKLF/ADAM8/PTPRO/LGALS3/XCL2/CCR2/CCR6/CCL19/CCL24/ICAM1/SPN/CXCL13/JAML/XG/CXCL10/CCL23/TNFSF11/NBL1/CH25H/MYO1G/CXCL11/CCL13/FPR2/GREM1/CCL1/CCL22/CCL11/CCL7/CCL20/CCL17/SAA1/ALOX5/CXCL17	35
BP	GO:0032944	regulation of mononuclear cell proliferation	38/800	9.02938e-13	8.70959e-11	FCGR2B/TNFRSF13B/IL12B/LGALS3/CD274/IL2RA/CLEC4G/IL18/RAC2/CCR2/CCL19/MNDA/FGF10/SPN/CARD11/CRP/CTLA4/LST1/CD74/IL2/CD80/HLA-DPB1/HLA-DRB1/PDCD1LG2/TNFSF4/CD55/HLA-DPA1/EBI3/CLC/FOXP3/TNFSF9/GPNMB/CD70/MZB1/IL4I1/TNFSF18/HLA-G/VTCN1	38
BP	GO:0061844	antimicrobial humoral immune response mediated by antimicrobial peptide	22/800	1.01942e-12	9.63251e-11	CXCL14/CXCL3/CXCL13/DEFB1/CXCL9/KLK7/CXCL6/NOD2/CXCL10/MUC7/RNASE3/IL17A/CXCL8/CXCL11/S100A9/GNLY/CCL13/KRT6A/PPBP/ELANE/CXCL1/CXCL5	22
BP	GO:0008544	epidermis development	48/800	1.23381e-12	1.14251e-10	LHFPL5/TGFB2/LGR5/KRT5/WNT10A/FST/LAMB3/LAMC2/FGF10/CST6/HPSE/WNT16/KRT15/PPL/KRT6B/KLK7/KRT34/AQP3/FOXQ1/SPRR2A/HLA-DRB1/GRHL3/CDSN/PITX2/LCE1B/ABCA12/CSTA/KRT32/KRT80/TGM5/LCE1C/KRT16/INHBA/SFRP4/KRT79/SULT2B1/KRT17/ALOX15B/KRT6A/SPRR3/SPRR1A/IVL/LIPK/SFN/EREG/KRT75/SPRR2D/SPRR1B	48
BP	GO:0050867	positive regulation of cell activation	54/800	1.6744e-12	1.52009e-10	ADAM8/IL12B/SPACA3/CD274/ICOS/IL2RA/ITGAM/IL18/SIRPG/CCR2/CCL19/DPP4/ITGB2/FGF10/CD2/FCHO1/CARD11/CTSC/IFNG/HLA-DMA/CLEC4D/CD74/IL2/HLA-DOB/RUNX1/CD80/NOD2/HLA-DPB1/HLA-DRA/HLA-DQA1/HLA-DRB1/PDCD1LG2/TNFSF4/CD55/TNFSF11/HLA-DQB1/HLA-DPA1/EBI3/CRLF2/FOXP3/IL1RL1/TNFSF9/HLA-DRB5/HLA-DOA/HLA-DQA2/IGLL1/HLA-DQB2/LBP/CD70/IL4I1/IGLL5/HLA-G/VTCN1/CD177	54
BP	GO:0050866	negative regulation of cell activation	36/800	1.86846e-12	1.66364e-10	FCGR2B/TNFRSF13B/SPI1/CST7/LGALS3/MILR1/CD274/IL2RA/CLEC4G/CCR2/LAX1/MNDA/SPN/CD300LF/IL31RA/TIGIT/LAG3/CTLA4/LST1/IFNL1/CD74/IL2/RUNX1/CD80/FGG/HLA-DRB1/PDCD1LG2/TNFSF4/CEACAM1/LDLR/FOXP3/INHBA/GPNMB/IL4I1/HLA-G/VTCN1	36
BP	GO:0010466	negative regulation of peptidase activity	40/800	2.01225e-12	1.75787e-10	PTGS2/CST7/SPINK7/SPOCK3/TFPI2/RARRES1/ANXA2/SPINK2/C3/CST6/SERPINB4/SERPINA6/NLRP7/SERPINA9/SERPINB5/CARD17/SPOCK2/PROS1/PLAUR/PI3/COL6A3/OPRPN/BIRC3/SERPINA1/CSTA/SERPINA12/SERPINB7/WFDC10B/ANXA8/CST5/BIRC7/SFRP2/SERPINB10/SFN/SERPINB2/SERPINA11/SLPI/CST4/CST1/CST2	40
BP	GO:0002495	antigen processing and presentation of peptide antigen via MHC class II	15/800	2.08066e-12	1.78397e-10	FCGR2B/HLA-DMA/CD74/HLA-DOB/HLA-DPB1/HLA-DRA/HLA-DQA1/HLA-DRB1/HLA-DQB1/HLA-DPA1/CTSE/HLA-DRB5/HLA-DOA/HLA-DQA2/HLA-DQB2	15
BP	GO:0050670	regulation of lymphocyte proliferation	37/800	2.76349e-12	2.32636e-10	FCGR2B/TNFRSF13B/IL12B/LGALS3/CD274/IL2RA/CLEC4G/IL18/RAC2/CCR2/CCL19/MNDA/FGF10/SPN/CARD11/CTLA4/LST1/CD74/IL2/CD80/HLA-DPB1/HLA-DRB1/PDCD1LG2/TNFSF4/CD55/HLA-DPA1/EBI3/CLC/FOXP3/TNFSF9/GPNMB/CD70/MZB1/IL4I1/TNFSF18/HLA-G/VTCN1	37
BP	GO:0002396	MHC protein complex assembly	12/800	2.99148e-12	2.42992e-10	HLA-DMA/HLA-DOB/HLA-DPB1/HLA-DRA/HLA-DQA1/HLA-DRB1/HLA-DQB1/HLA-DPA1/HLA-DRB5/HLA-DOA/HLA-DQA2/HLA-DQB2	12
BP	GO:0002501	peptide antigen assembly with MHC protein complex	12/800	2.99148e-12	2.42992e-10	HLA-DMA/HLA-DOB/HLA-DPB1/HLA-DRA/HLA-DQA1/HLA-DRB1/HLA-DQB1/HLA-DPA1/HLA-DRB5/HLA-DOA/HLA-DQA2/HLA-DQB2	12
BP	GO:1903131	mononuclear cell differentiation	53/800	4.29578e-12	3.42922e-10	FCGR2B/CDH17/SPI1/SLAMF8/NTRK1/PRTN3/ADAM8/IL12B/TMEM176B/IL2RA/IL18/CCR2/CCR6/GPR68/CCL19/RSAD2/TMEM176A/HLA-B/CD2/ZNF683/SPN/CARD11/CD3D/IL31RA/IFNG/LAG3/BATF3/CTLA4/CLEC4D/IFNL1/CD74/IL2/RUNX1/CD80/UBD/IL11/HLA-DRA/ITGB6/HLA-DRB1/TNFSF4/CD79A/BATF/FOXP3/DCSTAMP/TNFSF9/INHBA/CCR9/HLA-DOA/CSF2/LY6D/IL4I1/HLA-G/PSG9	53
BP	GO:0002504	antigen processing and presentation of peptide or polysaccharide antigen via MHC class II	15/800	5.76355e-12	4.52292e-10	FCGR2B/HLA-DMA/CD74/HLA-DOB/HLA-DPB1/HLA-DRA/HLA-DQA1/HLA-DRB1/HLA-DQB1/HLA-DPA1/CTSE/HLA-DRB5/HLA-DOA/HLA-DQA2/HLA-DQB2	15
BP	GO:0002456	T cell mediated immunity	25/800	6.5692e-12	5.06923e-10	FCGR2B/IL12B/CLEC4G/IL18/CCR2/RSAD2/HLA-B/ICAM1/CTSC/NOD2/HLA-DRA/HLA-DRB1/TNFSF4/CD55/CEACAM1/CLC/FOXP3/MYO1G/CD1C/CD1E/CD70/IL4I1/CD1B/CD1A/HLA-G	25
BP	GO:0002526	acute inflammatory response	25/800	8.1012e-12	6.14894e-10	FCGR2B/CREB3L3/ADAM8/PTGS2/OSM/C3/ADRA2A/OSMR/IL31RA/CRP/TREM1/TNFSF4/TNFSF11/PTGES/ALOX5AP/SERPINA1/S100A8/LBP/SAA4/ELANE/C2CD4B/FN1/SAA1/C2CD4A/SAA2	25
BP	GO:0002822	regulation of adaptive immune response based on somatic recombination of immune receptors built from immunoglobulin superfamily domains	31/800	9.43961e-12	7.04925e-10	FCGR2B/CR1L/IL12B/CD274/CLEC4G/IL18/CCR2/CCL19/RSAD2/HLA-B/C3/IL2/CD80/NOD2/HLA-DRA/HLA-DRB1/CLEC6A/TNFSF4/CD55/CEACAM1/CLC/FOXP3/LTA/IL1RL1/CD1C/CD1E/IL4I1/CD1B/CD1A/NLRP10/HLA-G	31
BP	GO:0048247	lymphocyte chemotaxis	19/800	1.03258e-11	7.58863e-10	CKLF/ADAM8/XCL2/CCR2/CCL19/CCL24/CXCL13/CXCL10/CCL23/CH25H/CXCL11/CCL13/CCL1/CCL22/CCL11/CCL7/CCL20/CCL17/SAA1	19
BP	GO:0002478	antigen processing and presentation of exogenous peptide antigen	15/800	1.47877e-11	1.0698e-09	FCGR2B/HLA-DMA/CD74/HLA-DOB/HLA-DPB1/HLA-DRA/HLA-DQA1/HLA-DRB1/HLA-DQB1/HLA-DPA1/CTSE/HLA-DRB5/HLA-DOA/HLA-DQA2/HLA-DQB2	15
BP	GO:0019882	antigen processing and presentation	24/800	1.55332e-11	1.10644e-09	FCGR2B/CCL19/HLA-B/ICAM1/HLA-DMA/CD74/HLA-DOB/NOD2/HLA-DPB1/HLA-DRA/HLA-DQA1/HLA-DRB1/HLA-DQB1/HLA-DPA1/CTSE/HLA-DRB5/HLA-DOA/HLA-DQA2/HLA-DQB2/CD1C/CD1E/CD1B/CD1A/HLA-G	24
BP	GO:0002274	myeloid leukocyte activation	36/800	1.60304e-11	1.12456e-09	FCGR2B/SPI1/CST7/SPACA3/MILR1/ITGAM/IL18/RAC2/CCR2/ITGB2/ANXA3/CD2/MRGPRX2/CD300LF/IL31RA/CTSC/IFNG/BATF3/CLEC4D/CXCL6/CD74/UBD/ITGB6/BATF/LDLR/CRLF2/DCSTAMP/CXCL8/IL1RL1/PLA2G2A/CSF2/FPR2/LBP/AZU1/FN1/CD177	36
BP	GO:0070661	leukocyte proliferation	44/800	1.75323e-11	1.21156e-09	FCGR2B/TNFRSF13B/IL12B/LGALS3/CD274/IL2RA/CLEC4G/IL18/RAC2/CCR2/CCL19/MNDA/FGF10/SPN/CARD11/CRP/CTLA4/LST1/CD74/IL2/CD80/HLA-DPB1/HLA-DRB1/PDCD1LG2/TNFSF4/CD55/TNFSF11/CD79A/HLA-DPA1/EBI3/CLC/FOXP3/TNFSF9/GPNMB/CSF2/OCSTAMP/GREM1/CD70/MZB1/IL4I1/TNFSF18/HLA-G/PTH/VTCN1	44
BP	GO:0031424	keratinization	21/800	4.11144e-11	2.79941e-09	KRT5/PPL/KRT6B/SPRR2A/CDSN/LCE1B/ABCA12/KRT80/LCE1C/KRT16/KRT79/KRT17/KRT6A/SPRR3/SPRR1A/IVL/LIPK/SFN/KRT75/SPRR2D/SPRR1B	21
BP	GO:0042129	regulation of T cell proliferation	30/800	5.55935e-11	3.73041e-09	IL12B/LGALS3/CD274/IL2RA/CLEC4G/IL18/RAC2/CCR2/CCL19/SPN/CARD11/CTLA4/IL2/CD80/HLA-DPB1/HLA-DRB1/PDCD1LG2/TNFSF4/CD55/HLA-DPA1/EBI3/CLC/FOXP3/TNFSF9/GPNMB/CD70/IL4I1/TNFSF18/HLA-G/VTCN1	30
BP	GO:0002709	regulation of T cell mediated immunity	21/800	8.34604e-11	5.52031e-09	FCGR2B/IL12B/CLEC4G/IL18/CCR2/RSAD2/HLA-B/NOD2/HLA-DRA/HLA-DRB1/TNFSF4/CD55/CEACAM1/CLC/FOXP3/CD1C/CD1E/IL4I1/CD1B/CD1A/HLA-G	21
BP	GO:0002819	regulation of adaptive immune response	31/800	8.62366e-11	5.6236e-09	FCGR2B/CR1L/IL12B/CD274/CLEC4G/IL18/CCR2/CCL19/RSAD2/HLA-B/C3/IL2/CD80/NOD2/HLA-DRA/HLA-DRB1/CLEC6A/TNFSF4/CD55/CEACAM1/CLC/FOXP3/LTA/IL1RL1/CD1C/CD1E/IL4I1/CD1B/CD1A/NLRP10/HLA-G	31
BP	GO:1902105	regulation of leukocyte differentiation	39/800	9.2677e-11	5.95965e-09	FCGR2B/SLAMF8/ADAM8/IL12B/TMEM176B/IL2RA/IL18/CCR2/GPR68/CCL19/TMEM176A/HLA-B/CD2/ZNF683/TNFAIP6/CARD11/IFNG/LAG3/CTLA4/IFNL1/CD74/IL2/RUNX1/CD80/HLA-DRA/HLA-DRB1/TNFSF4/CEACAM1/TNFSF11/IL17A/FOXP3/DCSTAMP/TNFSF9/INHBA/HLA-DOA/OCSTAMP/IL4I1/HLA-G/PSG9	39
BP	GO:0002703	regulation of leukocyte mediated immunity	35/800	1.1177e-10	7.02886e-09	FCGR2B/SPI1/CR1L/IL12B/ITGAM/CLEC4G/IL18/RAC2/CCR2/RSAD2/NCR3/ITGB2/HLA-B/C3/ICAM1/SERPINB4/LAG3/CXCL6/IL2/NOD2/HLA-DRA/HLA-DRB1/TNFSF4/CD55/CEACAM1/CLC/FOXP3/LTA/CD1C/CD1E/IL4I1/CD1B/CD1A/HLA-G/CD177	35
BP	GO:0002699	positive regulation of immune effector process	36/800	1.1234e-10	7.02886e-09	SPI1/IL12B/ITGAM/IL18/RAC2/CCR2/CCL19/RSAD2/NCR3/ITGB2/HLA-B/C3/IFNG/LAG3/KLK7/INAVA/CD74/IL2/CD80/NOD2/HLA-DRA/HLA-DRB1/TNFSF4/CD55/IL17A/FOXP3/LTA/FCN1/CD1C/LBP/CD1E/MZB1/CD1B/CD1A/HLA-G/CD177	36
BP	GO:0031341	regulation of cell killing	22/800	1.63153e-10	1.0072e-08	FCGR2B/SPI1/CR1L/IL12B/ITGAM/NCR3/HLA-B/ICAM1/SERPINB4/IFNG/LAG3/CFH/CXCL6/HLA-DRA/HLA-DRB1/CD55/CEACAM1/CD1C/CD1E/CD1B/CD1A/HLA-G	22
BP	GO:0072676	lymphocyte migration	24/800	1.66074e-10	1.01174e-08	CKLF/ADAM8/XCL2/CCR2/CCR6/CCL19/CCL24/ICAM1/SPN/CXCL13/XG/CXCL10/CCL23/CH25H/MYO1G/CXCL11/CCL13/CCL1/CCL22/CCL11/CCL7/CCL20/CCL17/SAA1	24
BP	GO:0002237	response to molecule of bacterial origin	44/800	1.80087e-10	1.08286e-08	FCGR2B/SPI1/PTGS2/IL12B/CD274/TNIP3/IL18/CXCL3/FGF10/HCK/TH/CXCL13/APOB/C2/CXCL9/INAVA/NLRP7/CXCL6/CD80/MRC1/CARD17/NOD2/CXCL10/PDCD1LG2/TNFSF4/CD55/S100A8/FOXP3/CXCL8/LTA/IL1F10/CXCL11/IL36RN/S100A9/CSF2/IL36G/LBP/PPBP/ELANE/CXCL1/CXCL5/SLPI/IL36A/IL37	44
BP	GO:0051250	negative regulation of lymphocyte activation	28/800	1.97433e-10	1.17194e-08	FCGR2B/TNFRSF13B/LGALS3/CD274/IL2RA/CLEC4G/LAX1/MNDA/SPN/TIGIT/LAG3/CTLA4/LST1/IFNL1/CD74/IL2/RUNX1/CD80/HLA-DRB1/PDCD1LG2/TNFSF4/CEACAM1/FOXP3/INHBA/GPNMB/IL4I1/HLA-G/VTCN1	28
BP	GO:0002685	regulation of leukocyte migration	33/800	2.20464e-10	1.29209e-08	SPI1/SLAMF8/ADAM8/LGALS3/XCL2/RAC2/CCR2/CCR6/CCL19/DPP4/TNFAIP6/CCL24/ICAM1/SPN/CXCL13/XG/CD74/NOD2/CXCL10/NBL1/TNFRSF18/CXCL8/ITGA2/FPR2/LBP/GREM1/FUT9/CCL1/ELANE/TNFSF18/CCL7/CCL20/CXCL17	33
BP	GO:0001909	leukocyte mediated cytotoxicity	25/800	2.40449e-10	1.3916e-08	FCGR2B/SPI1/GZMB/IL12B/ITGAM/IL18/NCR3/HLA-B/ICAM1/SERPINB4/CTSC/LAG3/CXCL6/TREM1/HLA-DRA/SLAMF7/HLA-DRB1/CEACAM1/CD1C/CD1E/CD1B/ELANE/AZU1/CD1A/HLA-G	25
BP	GO:0007162	negative regulation of cell adhesion	40/800	2.44449e-10	1.39728e-08	FCGR2B/ARHGDIG/SPI1/PTPRO/LGALS3/CD274/IL2RA/CLEC4G/LAX1/FBLN1/TACSTD2/SPN/EFNA5/ERBB3/TIGIT/LAG3/CTLA4/IFNL1/CD74/IL2/RUNX1/CD80/FGG/MMP12/HLA-DRB1/PDCD1LG2/CDSN/TNFSF4/CEACAM1/ABCA12/FOXP3/GPNMB/IL1RN/IL4I1/CDKN2A/MUC21/COL1A1/MUC1/HLA-G/VTCN1	40
BP	GO:0019724	B cell mediated immunity	33/800	2.4927e-10	1.40747e-08	FCGR2B/SLA2/CR1L/C1R/CCR6/C1S/C3/C2/HLA-DMA/CRP/CD74/IL2/HLA-DOB/NOD2/HLA-DPB1/HLA-DRA/HLA-DQA1/HLA-DRB1/TNFSF4/CD55/HLA-DQB1/BATF/HLA-DPA1/FOXP3/LTA/HLA-DRB5/HLA-DOA/HLA-DQA2/IGLL1/HLA-DQB2/CD70/IGLL5/HLA-G	33
BP	GO:0032496	response to lipopolysaccharide	42/800	2.97654e-10	1.66041e-08	SPI1/PTGS2/IL12B/CD274/TNIP3/IL18/CXCL3/FGF10/HCK/TH/CXCL13/APOB/C2/CXCL9/NLRP7/CXCL6/CD80/MRC1/CARD17/NOD2/CXCL10/PDCD1LG2/TNFSF4/CD55/S100A8/FOXP3/CXCL8/LTA/IL1F10/CXCL11/IL36RN/S100A9/CSF2/IL36G/LBP/PPBP/ELANE/CXCL1/CXCL5/SLPI/IL36A/IL37	42
BP	GO:0050868	negative regulation of T cell activation	24/800	4.82421e-10	2.65906e-08	FCGR2B/LGALS3/CD274/IL2RA/CLEC4G/LAX1/SPN/TIGIT/LAG3/CTLA4/IFNL1/CD74/IL2/RUNX1/CD80/HLA-DRB1/PDCD1LG2/TNFSF4/CEACAM1/FOXP3/GPNMB/IL4I1/HLA-G/VTCN1	24
BP	GO:0032943	mononuclear cell proliferation	39/800	5.32745e-10	2.90189e-08	FCGR2B/TNFRSF13B/IL12B/LGALS3/CD274/IL2RA/CLEC4G/IL18/RAC2/CCR2/CCL19/MNDA/FGF10/SPN/CARD11/CRP/CTLA4/LST1/CD74/IL2/CD80/HLA-DPB1/HLA-DRB1/PDCD1LG2/TNFSF4/CD55/CD79A/HLA-DPA1/EBI3/CLC/FOXP3/TNFSF9/GPNMB/CD70/MZB1/IL4I1/TNFSF18/HLA-G/VTCN1	39
BP	GO:0048002	antigen processing and presentation of peptide antigen	17/800	6.68917e-10	3.60126e-08	FCGR2B/HLA-B/HLA-DMA/CD74/HLA-DOB/HLA-DPB1/HLA-DRA/HLA-DQA1/HLA-DRB1/HLA-DQB1/HLA-DPA1/CTSE/HLA-DRB5/HLA-DOA/HLA-DQA2/HLA-DQB2/HLA-G	17
BP	GO:0051251	positive regulation of lymphocyte activation	44/800	8.13756e-10	4.33068e-08	ADAM8/IL12B/CD274/ICOS/IL2RA/IL18/SIRPG/CCR2/CCL19/DPP4/FGF10/FCHO1/CARD11/IFNG/HLA-DMA/CD74/IL2/HLA-DOB/RUNX1/CD80/NOD2/HLA-DPB1/HLA-DRA/HLA-DQA1/HLA-DRB1/PDCD1LG2/TNFSF4/CD55/TNFSF11/HLA-DQB1/HLA-DPA1/EBI3/FOXP3/TNFSF9/HLA-DRB5/HLA-DOA/HLA-DQA2/IGLL1/HLA-DQB2/CD70/IL4I1/IGLL5/HLA-G/VTCN1	44
BP	GO:0030574	collagen catabolic process	14/800	9.93453e-10	5.22692e-08	PRTN3/CTSK/MMP16/MMP12/FAP/MMP10/MMP11/MMP27/TMPRSS6/ADAMTS14/MMP3/MMP20/MMP7/MMP13	14
BP	GO:0045580	regulation of T cell differentiation	26/800	1.09545e-09	5.69878e-08	ADAM8/IL12B/IL2RA/IL18/CCR2/CCL19/CD2/ZNF683/CARD11/IFNG/LAG3/CTLA4/IFNL1/CD74/IL2/RUNX1/CD80/HLA-DRA/HLA-DRB1/TNFSF4/FOXP3/TNFSF9/HLA-DOA/IL4I1/HLA-G/PSG9	26
BP	GO:0070664	negative regulation of leukocyte proliferation	20/800	1.12729e-09	5.76401e-08	FCGR2B/TNFRSF13B/CD274/IL2RA/CLEC4G/MNDA/SPN/CRP/CTLA4/LST1/IL2/CD80/HLA-DRB1/PDCD1LG2/FOXP3/GPNMB/GREM1/IL4I1/HLA-G/VTCN1	20
BP	GO:0002824	positive regulation of adaptive immune response based on somatic recombination of immune receptors built from immunoglobulin superfamily domains	22/800	1.13288e-09	5.76401e-08	IL12B/CD274/IL18/CCR2/RSAD2/HLA-B/C3/IL2/NOD2/HLA-DRA/HLA-DRB1/CLEC6A/TNFSF4/CD55/FOXP3/LTA/CD1C/CD1E/CD1B/CD1A/NLRP10/HLA-G	22
BP	GO:0002687	positive regulation of leukocyte migration	25/800	1.21515e-09	6.11536e-08	SPI1/ADAM8/LGALS3/XCL2/RAC2/CCR2/CCR6/CCL19/CCL24/ICAM1/SPN/CXCL13/XG/CD74/CXCL10/TNFRSF18/CXCL8/ITGA2/FPR2/LBP/CCL1/TNFSF18/CCL7/CCL20/CXCL17	25
BP	GO:0018149	peptide cross-linking	13/800	1.26924e-09	6.24122e-08	SPOCK3/DCN/SPOCK2/PI3/CSTA/TGM5/TGM2/COL3A1/SPRR3/SPRR1A/IVL/FN1/SPRR1B	13
BP	GO:0046651	lymphocyte proliferation	38/800	1.27406e-09	6.24122e-08	FCGR2B/TNFRSF13B/IL12B/LGALS3/CD274/IL2RA/CLEC4G/IL18/RAC2/CCR2/CCL19/MNDA/FGF10/SPN/CARD11/CTLA4/LST1/CD74/IL2/CD80/HLA-DPB1/HLA-DRB1/PDCD1LG2/TNFSF4/CD55/CD79A/HLA-DPA1/EBI3/CLC/FOXP3/TNFSF9/GPNMB/CD70/MZB1/IL4I1/TNFSF18/HLA-G/VTCN1	38
BP	GO:0032963	collagen metabolic process	21/800	1.2806e-09	6.24122e-08	PRTN3/CTSK/CIITA/RUNX1/MMP16/MMP12/COL5A1/SERPINB7/COL1A2/ITGA2/FAP/MMP10/MMP11/MMP27/TMPRSS6/ADAMTS14/COL1A1/MMP3/MMP20/MMP7/MMP13	21
BP	GO:0002706	regulation of lymphocyte mediated immunity	28/800	1.42919e-09	6.89287e-08	FCGR2B/CR1L/IL12B/CLEC4G/IL18/CCR2/RSAD2/NCR3/HLA-B/C3/SERPINB4/LAG3/IL2/NOD2/HLA-DRA/HLA-DRB1/TNFSF4/CD55/CEACAM1/CLC/FOXP3/LTA/CD1C/CD1E/IL4I1/CD1B/CD1A/HLA-G	28
BP	GO:0022408	negative regulation of cell-cell adhesion	30/800	1.61175e-09	7.69321e-08	FCGR2B/SPI1/LGALS3/CD274/IL2RA/CLEC4G/LAX1/SPN/TIGIT/LAG3/CTLA4/IFNL1/CD74/IL2/RUNX1/CD80/FGG/HLA-DRB1/PDCD1LG2/CDSN/TNFSF4/CEACAM1/ABCA12/FOXP3/GPNMB/IL1RN/IL4I1/MUC21/HLA-G/VTCN1	30
BP	GO:0032945	negative regulation of mononuclear cell proliferation	19/800	2.16753e-09	1.02405e-07	FCGR2B/TNFRSF13B/CD274/IL2RA/CLEC4G/MNDA/SPN/CRP/CTLA4/LST1/IL2/CD80/HLA-DRB1/PDCD1LG2/FOXP3/GPNMB/IL4I1/HLA-G/VTCN1	19
BP	GO:0051346	negative regulation of hydrolase activity	43/800	2.57898e-09	1.20613e-07	TGFB2/PTGS2/CST7/SPINK7/LGALS3/SPOCK3/TFPI2/RARRES1/ANXA2/AMOT/SPINK2/C3/CST6/SERPINB4/SERPINA6/NLRP7/SERPINA9/SERPINB5/CARD17/SPOCK2/PROS1/PLAUR/PI3/COL6A3/OPRPN/BIRC3/SERPINA1/CSTA/SERPINA12/SERPINB7/WFDC10B/ANXA8/CST5/BIRC7/SFRP2/SERPINB10/SFN/SERPINB2/SERPINA11/SLPI/CST4/CST1/CST2	43
BP	GO:0002821	positive regulation of adaptive immune response	22/800	2.73517e-09	1.26638e-07	IL12B/CD274/IL18/CCR2/RSAD2/HLA-B/C3/IL2/NOD2/HLA-DRA/HLA-DRB1/CLEC6A/TNFSF4/CD55/FOXP3/LTA/CD1C/CD1E/CD1B/CD1A/NLRP10/HLA-G	22
BP	GO:0042098	T cell proliferation	30/800	2.94119e-09	1.34829e-07	IL12B/LGALS3/CD274/IL2RA/CLEC4G/IL18/RAC2/CCR2/CCL19/SPN/CARD11/CTLA4/IL2/CD80/HLA-DPB1/HLA-DRB1/PDCD1LG2/TNFSF4/CD55/HLA-DPA1/EBI3/CLC/FOXP3/TNFSF9/GPNMB/CD70/IL4I1/TNFSF18/HLA-G/VTCN1	30
BP	GO:0045619	regulation of lymphocyte differentiation	28/800	3.12131e-09	1.41683e-07	SLAMF8/ADAM8/IL12B/IL2RA/IL18/CCR2/CCL19/CD2/ZNF683/CARD11/IFNG/LAG3/CTLA4/IFNL1/CD74/IL2/RUNX1/CD80/HLA-DRA/HLA-DRB1/TNFSF4/FOXP3/TNFSF9/INHBA/HLA-DOA/IL4I1/HLA-G/PSG9	28
BP	GO:0071219	cellular response to molecule of bacterial origin	32/800	3.20368e-09	1.4401e-07	FCGR2B/SPI1/IL12B/CD274/TNIP3/IL18/CXCL3/HCK/CXCL13/CXCL9/NLRP7/CXCL6/CD80/MRC1/CARD17/NOD2/CXCL10/PDCD1LG2/TNFSF4/CD55/CXCL8/IL1F10/CXCL11/IL36RN/CSF2/IL36G/LBP/PPBP/CXCL1/CXCL5/IL36A/IL37	32
BP	GO:0002286	T cell activation involved in immune response	22/800	3.24206e-09	1.44334e-07	FCGR2B/IL12B/LGALS3/IL18/CCL19/ICAM1/SPN/IFNG/CLEC4D/IFNL1/CD74/IL2/CD80/LCP1/HLA-DRA/HLA-DRB1/TNFSF4/CEACAM1/BATF/FOXP3/CD1C/TNFSF18	22
BP	GO:0071222	cellular response to lipopolysaccharide	31/800	3.28743e-09	1.4496e-07	SPI1/IL12B/CD274/TNIP3/IL18/CXCL3/HCK/CXCL13/CXCL9/NLRP7/CXCL6/CD80/MRC1/CARD17/NOD2/CXCL10/PDCD1LG2/TNFSF4/CD55/CXCL8/IL1F10/CXCL11/IL36RN/CSF2/IL36G/LBP/PPBP/CXCL1/CXCL5/IL36A/IL37	31
BP	GO:0002705	positive regulation of leukocyte mediated immunity	24/800	3.88715e-09	1.69788e-07	SPI1/IL12B/ITGAM/IL18/RSAD2/NCR3/ITGB2/HLA-B/C3/LAG3/IL2/NOD2/HLA-DRA/HLA-DRB1/TNFSF4/CD55/FOXP3/LTA/CD1C/CD1E/CD1B/CD1A/HLA-G/CD177	24
BP	GO:0070374	positive regulation of ERK1 and ERK2 cascade	31/800	4.60215e-09	1.9914e-07	NTRK1/XCL2/CCL19/NPSR1/FGF10/CCL24/ICAM1/CD74/FGG/HTR2A/NOD2/FFAR4/HLA-DRB1/IL26/CCL23/FGB/TNFSF11/GPNMB/PLA2G2A/CCL13/FPR2/MARCO/P2RY6/CCL1/CCL22/CHI3L1/CCL11/CCL7/CCL20/CCL17/CXCL17	31
BP	GO:0006909	phagocytosis	38/800	4.70116e-09	2.0154e-07	FCGR2B/PRTN3/CEACAM4/SPACA3/MET/ITGAM/SIRPG/RAC2/CCR2/GULP1/ITGB2/ANXA3/C3/HCK/MEGF10/CD300LF/NCF2/IFNG/C2/CRP/IL2RG/NOD2/COLEC12/LDLR/TGM2/MYO1G/ITGA2/FCN1/FPR2/IGLL1/MARCO/LBP/P2RY6/ELANE/AZU1/PLPP4/IGLL5/XKR4	38
BP	GO:0097028	dendritic cell differentiation	14/800	5.26597e-09	2.23683e-07	FCGR2B/SPI1/PRTN3/TMEM176B/CCL19/TMEM176A/HLA-B/BATF3/UBD/ITGB6/BATF/DCSTAMP/CSF2/HLA-G	14
BP	GO:0052548	regulation of endopeptidase activity	46/800	6.88621e-09	2.89847e-07	PTGS2/CST7/SPINK7/SPOCK3/TFPI2/PSMB9/RARRES1/ANXA2/SPINK2/C3/CST6/SERPINB4/SERPINA6/PERP/NLRP7/SERPINA9/SERPINB5/CARD17/SPOCK2/PROS1/PLAUR/PI3/COL6A3/OPRPN/BIRC3/SERPINA1/CSTA/SERPINA12/PMAIP1/S100A8/SERPINB7/WFDC10B/S100A9/ANXA8/XDH/CST5/BIRC7/SFRP2/SERPINB10/SFN/SERPINB2/SERPINA11/SLPI/CST4/CST1/CST2	46
BP	GO:0052547	regulation of peptidase activity	48/800	7.36215e-09	3.07088e-07	PTGS2/CST7/SPINK7/SPOCK3/TFPI2/FBLN1/PSMB9/RARRES1/ANXA2/SPINK2/C3/CST6/SERPINB4/SERPINA6/PERP/NLRP7/SERPINA9/SERPINB5/CARD17/SPOCK2/PROS1/PLAUR/PI3/COL6A3/OPRPN/BIRC3/SERPINA1/CSTA/SERPINA12/PMAIP1/S100A8/SERPINB7/WFDC10B/S100A9/ANXA8/XDH/CST5/BIRC7/SFRP2/FN1/SERPINB10/SFN/SERPINB2/SERPINA11/SLPI/CST4/CST1/CST2	48
BP	GO:0002381	immunoglobulin production involved in immunoglobulin-mediated immune response	17/800	7.8258e-09	3.232e-07	CCR6/HLA-DMA/IL2/HLA-DOB/HLA-DPB1/HLA-DRA/HLA-DQA1/HLA-DRB1/TNFSF4/HLA-DQB1/BATF/HLA-DPA1/FOXP3/HLA-DRB5/HLA-DOA/HLA-DQA2/HLA-DQB2	17
BP	GO:0030217	T cell differentiation	34/800	7.92119e-09	3.232e-07	SPI1/ADAM8/IL12B/IL2RA/IL18/CCR2/CCR6/CCL19/RSAD2/CD2/ZNF683/SPN/CARD11/CD3D/IFNG/LAG3/CTLA4/CLEC4D/IFNL1/CD74/IL2/RUNX1/CD80/HLA-DRA/HLA-DRB1/TNFSF4/BATF/FOXP3/TNFSF9/CCR9/HLA-DOA/IL4I1/HLA-G/PSG9	34
BP	GO:1903706	regulation of hemopoiesis	42/800	7.95784e-09	3.232e-07	FCGR2B/SPI1/SLAMF8/ADAM8/IL12B/TMEM176B/IL2RA/IL18/CCR2/GPR68/CCL19/TMEM176A/ISG15/HLA-B/CD2/ZNF683/TNFAIP6/CARD11/IFNG/LAG3/CTLA4/IFNL1/CD74/IL2/RUNX1/CD80/HLA-DRA/HLA-DRB1/TNFSF4/CEACAM1/TNFSF11/IL17A/FOXP3/DCSTAMP/TNFSF9/INHBA/HLA-DOA/OCSTAMP/IL4I1/LOX/HLA-G/PSG9	42
BP	GO:1903038	negative regulation of leukocyte cell-cell adhesion	24/800	9.30902e-09	3.74789e-07	FCGR2B/LGALS3/CD274/IL2RA/CLEC4G/LAX1/SPN/TIGIT/LAG3/CTLA4/IFNL1/CD74/IL2/RUNX1/CD80/HLA-DRB1/PDCD1LG2/TNFSF4/CEACAM1/FOXP3/GPNMB/IL4I1/HLA-G/VTCN1	24
BP	GO:0030216	keratinocyte differentiation	26/800	9.92044e-09	3.95962e-07	KRT5/WNT16/PPL/KRT6B/AQP3/SPRR2A/CDSN/LCE1B/ABCA12/CSTA/KRT80/LCE1C/KRT16/KRT79/KRT17/ALOX15B/KRT6A/SPRR3/SPRR1A/IVL/LIPK/SFN/EREG/KRT75/SPRR2D/SPRR1B	26
BP	GO:0050777	negative regulation of immune response	27/800	1.04037e-08	4.11701e-07	FCGR2B/SPI1/SLAMF8/CR1L/IL12B/LGALS3/CLEC4G/CCR2/ISG15/HLA-B/HCK/SERPINB4/CTLA4/IFNL1/IL2/NOD2/MMP12/HLA-DRB1/TNFSF4/CD55/CEACAM1/FCRLB/FOXP3/IL1RL1/COL3A1/IL4I1/HLA-G	27
BP	GO:0016064	immunoglobulin mediated immune response	30/800	1.14584e-08	4.49597e-07	FCGR2B/CR1L/C1R/CCR6/C1S/C3/C2/HLA-DMA/CRP/CD74/IL2/HLA-DOB/NOD2/HLA-DPB1/HLA-DRA/HLA-DQA1/HLA-DRB1/TNFSF4/CD55/HLA-DQB1/BATF/HLA-DPA1/FOXP3/LTA/HLA-DRB5/HLA-DOA/HLA-DQA2/IGLL1/HLA-DQB2/IGLL5	30
BP	GO:0050672	negative regulation of lymphocyte proliferation	18/800	1.16986e-08	4.55162e-07	FCGR2B/TNFRSF13B/CD274/IL2RA/CLEC4G/MNDA/SPN/CTLA4/LST1/IL2/CD80/HLA-DRB1/PDCD1LG2/FOXP3/GPNMB/IL4I1/HLA-G/VTCN1	18
BP	GO:0045861	negative regulation of proteolysis	40/800	1.38737e-08	5.35293e-07	PTGS2/CST7/SPINK7/SPOCK3/TFPI2/RARRES1/ANXA2/SPINK2/C3/CST6/SERPINB4/SERPINA6/NLRP7/SERPINA9/SERPINB5/CARD17/SPOCK2/PROS1/PLAUR/PI3/COL6A3/OPRPN/BIRC3/SERPINA1/CSTA/SERPINA12/SERPINB7/WFDC10B/ANXA8/CST5/BIRC7/SFRP2/SERPINB10/SFN/SERPINB2/SERPINA11/SLPI/CST4/CST1/CST2	40
BP	GO:0001910	regulation of leukocyte mediated cytotoxicity	18/800	1.42591e-08	5.45618e-07	FCGR2B/SPI1/IL12B/ITGAM/NCR3/HLA-B/ICAM1/SERPINB4/LAG3/CXCL6/HLA-DRA/HLA-DRB1/CEACAM1/CD1C/CD1E/CD1B/CD1A/HLA-G	18
BP	GO:0002366	leukocyte activation involved in immune response	35/800	1.82155e-08	6.91293e-07	FCGR2B/CDH17/SPI1/IL12B/LGALS3/MILR1/ITGAM/IL18/RAC2/CCR2/CCR6/CCL19/ITGB2/ANXA3/ZNF683/ICAM1/SPN/MRGPRX2/IFNG/CLEC4D/IFNL1/CD74/IL2/CD80/LCP1/HLA-DRA/HLA-DRB1/TNFSF4/CEACAM1/BATF/FOXP3/CD1C/LBP/TNFSF18/CD177	35
BP	GO:0045109	intermediate filament organization	16/800	1.83951e-08	6.92433e-07	KRT5/KRT15/KRT6B/KRT34/KRT32/KRT80/NEFM/KRT23/KRT16/KRT79/KRT13/KRT17/INA/KRT6A/KRT19/KRT75	16
BP	GO:0030098	lymphocyte differentiation	42/800	1.86823e-08	6.97574e-07	FCGR2B/CDH17/SPI1/SLAMF8/NTRK1/ADAM8/IL12B/IL2RA/IL18/CCR2/CCR6/CCL19/RSAD2/CD2/ZNF683/SPN/CARD11/CD3D/IFNG/LAG3/CTLA4/CLEC4D/IFNL1/CD74/IL2/RUNX1/CD80/IL11/HLA-DRA/HLA-DRB1/TNFSF4/CD79A/BATF/FOXP3/TNFSF9/INHBA/CCR9/HLA-DOA/LY6D/IL4I1/HLA-G/PSG9	42
BP	GO:0045104	intermediate filament cytoskeleton organization	18/800	2.53512e-08	9.39008e-07	DST/KRT5/KRT15/PPL/KRT6B/KRT34/KRT32/KRT80/NEFM/KRT23/KRT16/KRT79/KRT13/KRT17/INA/KRT6A/KRT19/KRT75	18
BP	GO:0002263	cell activation involved in immune response	35/800	2.60351e-08	9.56686e-07	FCGR2B/CDH17/SPI1/IL12B/LGALS3/MILR1/ITGAM/IL18/RAC2/CCR2/CCR6/CCL19/ITGB2/ANXA3/ZNF683/ICAM1/SPN/MRGPRX2/IFNG/CLEC4D/IFNL1/CD74/IL2/CD80/LCP1/HLA-DRA/HLA-DRB1/TNFSF4/CEACAM1/BATF/FOXP3/CD1C/LBP/TNFSF18/CD177	35
BP	GO:0043410	positive regulation of MAPK cascade	49/800	2.86102e-08	1.04303e-06	FCGR2B/TGFB2/SPI1/NTRK1/ADAM8/XCL2/GRM5/OSM/CCL19/NPSR1/FGF10/CCL24/ICAM1/WNT16/ADRA2A/INAVA/CD74/FGG/HTR2A/NOD2/FFAR4/IL11/HLA-DRB1/IL26/CCL23/FGB/TNFSF11/LPAR3/UNC5CL/GDF15/GPNMB/PLA2G2A/CCL13/FPR2/MARCO/ADRB3/XDH/P2RY6/CCL1/CCL22/CHI3L1/ELANE/BIRC7/CCL11/CCL7/CCL20/CCL17/CXCL17/WNT7A	49
BP	GO:0045103	intermediate filament-based process	18/800	3.05319e-08	1.1044e-06	DST/KRT5/KRT15/PPL/KRT6B/KRT34/KRT32/KRT80/NEFM/KRT23/KRT16/KRT79/KRT13/KRT17/INA/KRT6A/KRT19/KRT75	18
BP	GO:0022617	extracellular matrix disassembly	15/800	3.42258e-08	1.21897e-06	ADAM8/CTSK/DPP4/KLK7/LCP1/MMP12/FAP/MMP10/MMP11/ELANE/TMPRSS6/MMP3/MMP20/MMP7/MMP13	15
BP	GO:0030199	collagen fibril organization	15/800	3.42258e-08	1.21897e-06	TGFB2/COL5A2/COL12A1/COMP/COL5A1/COL1A2/LUM/COL3A1/GREM1/MMP11/LOX/ADAMTS14/COL1A1/SFRP2/COL11A1	15
BP	GO:0071216	cellular response to biotic stimulus	32/800	4.8809e-08	1.71703e-06	FCGR2B/SPI1/IL12B/CD274/TNIP3/IL18/CXCL3/HCK/CXCL13/CXCL9/NLRP7/CXCL6/CD80/MRC1/CARD17/NOD2/CXCL10/PDCD1LG2/TNFSF4/CD55/CXCL8/IL1F10/CXCL11/IL36RN/CSF2/IL36G/LBP/PPBP/CXCL1/CXCL5/IL36A/IL37	32
BP	GO:0009913	epidermal cell differentiation	30/800	4.8952e-08	1.71703e-06	LHFPL5/KRT5/WNT16/PPL/KRT6B/AQP3/SPRR2A/CDSN/PITX2/LCE1B/ABCA12/CSTA/KRT80/LCE1C/KRT16/SFRP4/KRT79/SULT2B1/KRT17/ALOX15B/KRT6A/SPRR3/SPRR1A/IVL/LIPK/SFN/EREG/KRT75/SPRR2D/SPRR1B	30
BP	GO:0002688	regulation of leukocyte chemotaxis	21/800	5.86451e-08	2.04155e-06	SPI1/SLAMF8/XCL2/RAC2/CCR2/CCR6/CCL19/DPP4/TNFAIP6/CXCL13/CD74/NOD2/CXCL10/NBL1/CXCL8/FPR2/LBP/GREM1/CCL1/CCL7/CXCL17	21
BP	GO:0070665	positive regulation of leukocyte proliferation	24/800	5.93278e-08	2.04991e-06	IL12B/CD274/IL2RA/IL18/CCR2/CCL19/FGF10/CARD11/CD74/IL2/CD80/HLA-DPB1/PDCD1LG2/TNFSF4/CD55/HLA-DPA1/EBI3/FOXP3/TNFSF9/CSF2/OCSTAMP/CD70/PTH/VTCN1	24
BP	GO:0042102	positive regulation of T cell proliferation	19/800	6.08096e-08	2.08554e-06	IL12B/CD274/IL2RA/IL18/CCR2/CCL19/CARD11/IL2/CD80/HLA-DPB1/PDCD1LG2/TNFSF4/CD55/HLA-DPA1/EBI3/FOXP3/TNFSF9/CD70/VTCN1	19
BP	GO:0045589	regulation of regulatory T cell differentiation	11/800	6.3419e-08	2.15904e-06	IFNG/LAG3/CTLA4/IL2/HLA-DRA/HLA-DRB1/TNFSF4/FOXP3/IL4I1/HLA-G/PSG9	11
BP	GO:0002675	positive regulation of acute inflammatory response	10/800	8.0343e-08	2.71524e-06	CREB3L3/ADAM8/PTGS2/OSM/C3/OSMR/TNFSF11/ALOX5AP/C2CD4B/C2CD4A	10
BP	GO:0002437	inflammatory response to antigenic stimulus	16/800	8.09846e-08	2.71709e-06	FCGR2B/IL12B/IL2RA/C3/HCK/IL31RA/NOD2/HLA-DRB1/LTA/IL1F10/IL36RN/IL36G/IL1RN/ELANE/IL36A/IL37	16
BP	GO:0002708	positive regulation of lymphocyte mediated immunity	20/800	1.03024e-07	3.38299e-06	IL12B/IL18/RSAD2/NCR3/HLA-B/C3/LAG3/IL2/NOD2/HLA-DRA/HLA-DRB1/TNFSF4/CD55/FOXP3/LTA/CD1C/CD1E/CD1B/CD1A/HLA-G	20
BP	GO:0032609	interferon-gamma production	20/800	1.03024e-07	3.38299e-06	IL12B/CD274/IL18/CCR2/ISG15/CD2/IFNL1/IL2/NOD2/HLA-DPB1/HLA-DRB1/PDCD1LG2/TNFSF4/HLA-DPA1/EBI3/FOXP3/LTA/IL1RL1/INHBA/IL36RN	20
BP	GO:0032649	regulation of interferon-gamma production	20/800	1.03024e-07	3.38299e-06	IL12B/CD274/IL18/CCR2/ISG15/CD2/IFNL1/IL2/NOD2/HLA-DPB1/HLA-DRB1/PDCD1LG2/TNFSF4/HLA-DPA1/EBI3/FOXP3/LTA/IL1RL1/INHBA/IL36RN	20
BP	GO:0050920	regulation of chemotaxis	29/800	1.06138e-07	3.46071e-06	SPI1/SLAMF8/PTPRO/SCG2/XCL2/MET/RAC2/CCR2/CCR6/CCL19/DPP4/FGF10/TNFAIP6/CXCL13/CD74/NOD2/CXCL10/NBL1/SEMA3C/CXCL8/ITGA2/FPR2/LBP/GREM1/CCL1/ELANE/AZU1/CCL7/CXCL17	29
BP	GO:0002711	positive regulation of T cell mediated immunity	14/800	1.27447e-07	4.12643e-06	IL12B/IL18/RSAD2/HLA-B/HLA-DRA/HLA-DRB1/TNFSF4/CD55/FOXP3/CD1C/CD1E/CD1B/CD1A/HLA-G	14
BP	GO:0070372	regulation of ERK1 and ERK2 cascade	35/800	1.63011e-07	5.24126e-06	NTRK1/XCL2/FBLN1/CCL19/NPSR1/FGF10/CCL24/ICAM1/CD74/FGG/HTR2A/NOD2/FFAR4/HLA-DRB1/IL26/CCL23/FGB/ROS1/CEACAM1/TNFSF11/GPNMB/PLA2G2A/CCL13/FPR2/MARCO/P2RY6/CCL1/CCL22/CHI3L1/CCL11/CCL7/FN1/CCL20/CCL17/CXCL17	35
BP	GO:0045066	regulatory T cell differentiation	11/800	1.75124e-07	5.59188e-06	IFNG/LAG3/CTLA4/IL2/HLA-DRA/HLA-DRB1/TNFSF4/FOXP3/IL4I1/HLA-G/PSG9	11
BP	GO:0072677	eosinophil migration	9/800	2.0877e-07	6.62057e-06	ADAM8/SCG2/HRH1/LGALS3/CCL24/CCL13/CCL1/CCL11/CCL7	9
BP	GO:0002698	negative regulation of immune effector process	19/800	2.42259e-07	7.63035e-06	FCGR2B/TGFB2/SPI1/SLAMF8/CR1L/LGALS3/CLEC4G/CCR2/HLA-B/SERPINB4/IFNL1/IL2/NOD2/TNFSF4/CD55/CEACAM1/FOXP3/IL4I1/HLA-G	19
BP	GO:0055074	calcium ion homeostasis	45/800	3.08152e-07	9.64017e-06	GRM5/MCUB/FPR3/CCR2/CCR6/CALB2/CCL19/NPSR1/NTSR1/CXCL13/CXCL9/JSRP1/GPR33/IL2/HTR2A/CXCL10/FFAR4/TRPM8/F2RL2/GNA15/MCHR1/CCL23/CD52/CD55/JPH3/TNFSF11/LPAR3/DRD5/TGM2/SLC24A2/GPR12/CXCL11/CCR8/CCR9/CCL13/FPR2/ADCY8/CSRP3/P2RY6/CCL1/ELANE/CCL11/CCL7/PTH/SAA1	45
BP	GO:0042742	defense response to bacterium	38/800	3.38645e-07	1.0523e-05	SLAMF8/IL12B/ISG15/ANXA3/SPN/CXCL13/DEFB1/KLK7/CRP/CLEC4D/CXCL6/NOD2/TREM1/RNASE3/LYZ/FGB/PI3/IL17A/COLEC12/JCHAIN/S100A8/LTA/WFDC10B/S100A9/GNLY/PLA2G2A/FPR2/IGLL1/KRT6A/LBP/PPBP/ELANE/AZU1/NLRP10/IGLL5/SLPI/CCL20/LCN2	38
BP	GO:0070371	ERK1 and ERK2 cascade	36/800	3.41528e-07	1.05418e-05	NTRK1/XCL2/FBLN1/CCL19/DUSP5/NPSR1/FGF10/CCL24/ICAM1/CD74/FGG/HTR2A/NOD2/FFAR4/HLA-DRB1/IL26/CCL23/FGB/ROS1/CEACAM1/TNFSF11/GPNMB/PLA2G2A/CCL13/FPR2/MARCO/P2RY6/CCL1/CCL22/CHI3L1/CCL11/CCL7/FN1/CCL20/CCL17/CXCL17	36
BP	GO:0006874	cellular calcium ion homeostasis	44/800	3.78735e-07	1.16129e-05	GRM5/MCUB/FPR3/CCR2/CCR6/CALB2/CCL19/NPSR1/NTSR1/CXCL13/CXCL9/JSRP1/GPR33/IL2/HTR2A/CXCL10/FFAR4/TRPM8/F2RL2/GNA15/MCHR1/CCL23/CD52/CD55/JPH3/LPAR3/DRD5/TGM2/SLC24A2/GPR12/CXCL11/CCR8/CCR9/CCL13/FPR2/ADCY8/CSRP3/P2RY6/CCL1/ELANE/CCL11/CCL7/PTH/SAA1	44
BP	GO:0045582	positive regulation of T cell differentiation	17/800	4.0325e-07	1.22832e-05	ADAM8/IL12B/IL2RA/IL18/CCL19/IFNG/CD74/IL2/RUNX1/CD80/HLA-DRA/HLA-DRB1/TNFSF4/FOXP3/TNFSF9/IL4I1/HLA-G	17
BP	GO:0002673	regulation of acute inflammatory response	12/800	4.29297e-07	1.29911e-05	FCGR2B/CREB3L3/ADAM8/PTGS2/OSM/C3/OSMR/TNFSF11/PTGES/ALOX5AP/C2CD4B/C2CD4A	12
BP	GO:0002285	lymphocyte activation involved in immune response	26/800	4.47533e-07	1.3455e-05	FCGR2B/CDH17/SPI1/IL12B/LGALS3/IL18/CCR6/CCL19/ZNF683/ICAM1/SPN/IFNG/CLEC4D/IFNL1/CD74/IL2/CD80/LCP1/HLA-DRA/HLA-DRB1/TNFSF4/CEACAM1/BATF/FOXP3/CD1C/TNFSF18	26
BP	GO:0031343	positive regulation of cell killing	14/800	4.61082e-07	1.3773e-05	SPI1/IL12B/ITGAM/NCR3/HLA-B/IFNG/LAG3/HLA-DRA/HLA-DRB1/CD1C/CD1E/CD1B/CD1A/HLA-G	14
BP	GO:0042060	wound healing	42/800	4.73808e-07	1.40624e-05	TGFB2/DST/PROC/TFPI2/FBLN1/FGF10/HPSE/ADRA2A/ERBB3/PPL/JAML/FGG/F2RL2/MMP12/PROS1/PLAUR/ITGB6/PLAU/GRHL3/FGB/CEACAM1/SERPINA1/INSL3/DRD5/COMP/S100A8/COL5A1/ITGA2/KRT6A/ANXA8/CCN4/COL3A1/FAP/SPRR3/LOX/COL1A1/FN1/SERPINB2/EREG/SAA1/ALOX5/WNT7A	42
BP	GO:0002523	leukocyte migration involved in inflammatory response	8/800	5.16754e-07	1.51429e-05	SLAMF8/ADAM8/CCR6/S100A8/S100A9/LBP/ELANE/ALOX5	8
BP	GO:0048245	eosinophil chemotaxis	8/800	5.16754e-07	1.51429e-05	SCG2/HRH1/LGALS3/CCL24/CCL13/CCL1/CCL11/CCL7	8
BP	GO:0002440	production of molecular mediator of immune response	34/800	5.21882e-07	1.51969e-05	FCGR2B/TGFB2/IL18/CCR2/CCR6/RSAD2/HLA-DMA/KLK7/INAVA/CD74/IL2/HLA-DOB/NOD2/TREM1/HLA-DPB1/HLA-DRA/HLA-DQA1/HLA-DRB1/TNFSF4/CD55/IL17A/HLA-DQB1/BATF/HLA-DPA1/CLC/FOXP3/SLAMF9/HLA-DRB5/HLA-DOA/HLA-DQA2/HLA-DQB2/MZB1/ELANE/HLA-G	34
BP	GO:0050731	positive regulation of peptidyl-tyrosine phosphorylation	25/800	5.3685e-07	1.55351e-05	IL12B/GRM5/OSM/IL18/CRLF1/FGF10/EFNA5/ADRA2A/ERBB3/IL31RA/IFNG/CNTN1/IFNL1/CD74/IL2/CD80/HTR2A/NOD2/IL11/CLEC6A/TNFRSF18/CSF2/GREM1/TNFSF18/EREG	25
BP	GO:0002253	activation of immune response	39/800	5.50251e-07	1.5776e-05	FCGR2B/CFHR1/SLA2/CR1L/LGALS3/C1R/FPR3/LAX1/C1S/MNDA/NCR3/C3/FCHO1/HCK/CARD11/C2/CRP/ZBP1/CFH/CTLA4/GPR33/NOD2/HLA-DPB1/HLA-DRB1/CLEC6A/CD55/CEACAM1/CD79A/HLA-DQB1/FOXP3/MYO1G/CFB/FCN1/FPR2/IGLL1/KCNN4/PLPP4/IGLL5/VTCN1	39
BP	GO:0050671	positive regulation of lymphocyte proliferation	21/800	5.52851e-07	1.5776e-05	IL12B/CD274/IL2RA/IL18/CCR2/CCL19/FGF10/CARD11/CD74/IL2/CD80/HLA-DPB1/PDCD1LG2/TNFSF4/CD55/HLA-DPA1/EBI3/FOXP3/TNFSF9/CD70/VTCN1	21
BP	GO:0044409	entry into host	22/800	5.55399e-07	1.5776e-05	TRIM10/TMPRSS2/CLEC4G/CLEC5A/CIITA/ICAM1/CD74/CD80/HTR2A/MRC1/ITGB6/ANPEP/HLA-DRB1/CD55/NECTIN4/LDLR/CH25H/CXCL8/ITGA2/FCN1/KRT6A/TMPRSS4	22
BP	GO:0071677	positive regulation of mononuclear cell migration	14/800	5.62548e-07	1.58817e-05	SPI1/ADAM8/LGALS3/XCL2/CCR2/CCR6/SPN/CXCL13/CXCL10/FPR2/CCL1/CCL7/CCL20/CXCL17	14
BP	GO:0072503	cellular divalent inorganic cation homeostasis	46/800	5.68808e-07	1.59611e-05	GRM5/MCUB/FPR3/CCR2/CCR6/CALB2/CCL19/NPSR1/NTSR1/CXCL13/CXCL9/JSRP1/GPR33/IL2/HTR2A/CXCL10/FFAR4/TRPM8/F2RL2/GNA15/MCHR1/CCL23/CD52/CD55/JPH3/LPAR3/DRD5/S100A8/TGM2/SLC24A2/GPR12/CXCL11/CCR8/CCR9/S100A9/CCL13/FPR2/ADCY8/CSRP3/P2RY6/CCL1/ELANE/CCL11/CCL7/PTH/SAA1	46
BP	GO:0001914	regulation of T cell mediated cytotoxicity	11/800	5.76547e-07	1.60808e-05	FCGR2B/IL12B/HLA-B/HLA-DRA/HLA-DRB1/CEACAM1/CD1C/CD1E/CD1B/CD1A/HLA-G	11
BP	GO:0032946	positive regulation of mononuclear cell proliferation	21/800	7.01839e-07	1.94582e-05	IL12B/CD274/IL2RA/IL18/CCR2/CCL19/FGF10/CARD11/CD74/IL2/CD80/HLA-DPB1/PDCD1LG2/TNFSF4/CD55/HLA-DPA1/EBI3/FOXP3/TNFSF9/CD70/VTCN1	21
BP	GO:0002833	positive regulation of response to biotic stimulus	24/800	7.07167e-07	1.9489e-05	SPI1/ADAM8/IL12B/CD274/OASL/GBP5/MNDA/TRIM15/NCR3/HCK/LAG3/KLK7/ZBP1/NOD2/MMP12/HLA-DRB1/CLEC6A/IL17A/FCN1/FPR2/LBP/NLRP10/EREG/HLA-G	24
BP	GO:0019883	antigen processing and presentation of endogenous antigen	9/800	7.11369e-07	1.9489e-05	HLA-B/CD74/HLA-DRA/HLA-DRB1/CD1C/CD1E/CD1B/CD1A/HLA-G	9
BP	GO:0001912	positive regulation of leukocyte mediated cytotoxicity	13/800	7.279e-07	1.98246e-05	SPI1/IL12B/ITGAM/NCR3/HLA-B/LAG3/HLA-DRA/HLA-DRB1/CD1C/CD1E/CD1B/CD1A/HLA-G	13
BP	GO:1902107	positive regulation of leukocyte differentiation	22/800	8.70631e-07	2.34362e-05	ADAM8/IL12B/IL2RA/IL18/GPR68/CCL19/IFNG/CD74/IL2/RUNX1/CD80/HLA-DRA/HLA-DRB1/TNFSF4/TNFSF11/IL17A/FOXP3/DCSTAMP/TNFSF9/OCSTAMP/IL4I1/HLA-G	22
BP	GO:1903708	positive regulation of hemopoiesis	22/800	8.70631e-07	2.34362e-05	ADAM8/IL12B/IL2RA/IL18/GPR68/CCL19/IFNG/CD74/IL2/RUNX1/CD80/HLA-DRA/HLA-DRB1/TNFSF4/TNFSF11/IL17A/FOXP3/DCSTAMP/TNFSF9/OCSTAMP/IL4I1/HLA-G	22
BP	GO:0001913	T cell mediated cytotoxicity	12/800	8.86822e-07	2.3734e-05	FCGR2B/IL12B/HLA-B/CTSC/HLA-DRA/HLA-DRB1/CEACAM1/CD1C/CD1E/CD1B/CD1A/HLA-G	12
BP	GO:0071347	cellular response to interleukin-1	18/800	9.95219e-07	2.6482e-05	XCL2/CCL19/CCL24/ZBP1/NLRP7/FGG/CCL23/FGB/IL17A/CXCL8/CCL13/IL1RN/CCL1/CCL22/CCL11/CCL7/CCL20/CCL17	18
BP	GO:0002831	regulation of response to biotic stimulus	36/800	1.05053e-06	2.7794e-05	FCGR2B/SPI1/SLAMF8/ADAM8/IL12B/CD274/OASL/GBP5/MNDA/TRIM15/NCR3/ISG15/HLA-B/HCK/SERPINB4/LAG3/KLK7/ZBP1/CFH/CXCL6/NOD2/MMP12/HLA-DRB1/CLEC6A/CD55/CEACAM1/IL17A/BIRC3/FOXP3/FCN1/FPR2/LBP/IL4I1/NLRP10/EREG/HLA-G	36
BP	GO:0098742	cell-cell adhesion via plasma-membrane adhesion molecules	31/800	1.08775e-06	2.86153e-05	CDH17/TGFB2/CLDN14/CDH20/MILR1/PCDHAC1/ITGAM/DCHS2/PCDH9/ITGB2/ICAM1/EFNA5/JAML/PCDHAC2/CBLN1/CLDN16/VSTM2L/L1CAM/CEACAM1/NECTIN4/CDH6/CLDN10/DSC2/FAT3/CDH11/IL1RN/DSC3/CEACAM8/PSG5/CEACAM6/CD177	31
BP	GO:0032102	negative regulation of response to external stimulus	41/800	1.21022e-06	3.16571e-05	FCGR2B/SLAMF8/PTPRO/CST7/IL12B/C1QTNF12/PROC/IL2RA/NT5E/DPP4/ISG15/HLA-B/TNFAIP6/HCK/CXCL13/SERPINB4/IL2/FGG/NOD2/FFAR4/MMP12/PROS1/HLA-DRB1/PLAU/FGB/CEACAM1/NBL1/LDLR/SEMA3C/FOXP3/KLK8/FPR2/GREM1/FAP/ELANE/IL22RA2/SERPINB2/HLA-G/SAA1/ALOX5/CXCL17	41
BP	GO:0018108	peptidyl-tyrosine phosphorylation	37/800	1.66589e-06	4.33318e-05	NTRK1/IL12B/GRM5/OSM/MET/IL18/CRLF1/ITGB2/FGF10/EPHA10/HCK/EFNA5/ADRA2A/ERBB3/IL31RA/IFNG/CNTN1/IFNL1/CD74/IL2/CD80/HTR2A/NOD2/EPHB3/IL11/CLEC6A/ROS1/ROR1/STYK1/TNFRSF18/CSF2/INSRR/GREM1/TNFSF18/IL22RA2/SFRP2/EREG	37
BP	GO:0050832	defense response to fungus	12/800	1.73291e-06	4.48233e-05	SPI1/ZBP1/CLEC4D/CLEC4C/CLEC6A/IL17A/S100A8/IL36RN/S100A9/GNLY/ELANE/NLRP10	12
BP	GO:0034341	response to interferon-gamma	20/800	1.99873e-06	5.11277e-05	IL12B/XCL2/GBP5/CCL19/CCL24/CIITA/HCK/IFNG/CD74/MRC1/UBD/CCL23/HLA-DPA1/CCL13/CCL1/CCL22/CCL11/CCL7/CCL20/CCL17	20
BP	GO:0050921	positive regulation of chemotaxis	20/800	1.99873e-06	5.11277e-05	SPI1/SCG2/XCL2/MET/RAC2/CCR2/CCR6/CCL19/FGF10/CXCL13/CD74/CXCL10/CXCL8/ITGA2/FPR2/LBP/CCL1/AZU1/CCL7/CXCL17	20
BP	GO:0018212	peptidyl-tyrosine modification	37/800	2.01472e-06	5.12536e-05	NTRK1/IL12B/GRM5/OSM/MET/IL18/CRLF1/ITGB2/FGF10/EPHA10/HCK/EFNA5/ADRA2A/ERBB3/IL31RA/IFNG/CNTN1/IFNL1/CD74/IL2/CD80/HTR2A/NOD2/EPHB3/IL11/CLEC6A/ROS1/ROR1/STYK1/TNFRSF18/CSF2/INSRR/GREM1/TNFSF18/IL22RA2/SFRP2/EREG	37
BP	GO:0001773	myeloid dendritic cell activation	9/800	2.03227e-06	5.14176e-05	SPI1/CD2/BATF3/CLEC4D/UBD/ITGB6/BATF/DCSTAMP/CSF2	9
BP	GO:0042088	T-helper 1 type immune response	11/800	2.08365e-06	5.21477e-05	IL12B/IL18/CCR2/CCL19/SPN/CD80/HLA-DRB1/TNFSF4/EBI3/IL1RL1/NLRP10	11
BP	GO:1902622	regulation of neutrophil migration	11/800	2.08365e-06	5.21477e-05	SLAMF8/ADAM8/RAC2/CCL19/DPP4/TNFAIP6/XG/CD74/NOD2/CXCL8/LBP	11
BP	GO:0002823	negative regulation of adaptive immune response based on somatic recombination of immune receptors built from immunoglobulin superfamily domains	12/800	2.14253e-06	5.30478e-05	FCGR2B/CR1L/CLEC4G/IL2/NOD2/TNFSF4/CD55/CEACAM1/FOXP3/IL1RL1/IL4I1/HLA-G	12
BP	GO:0006968	cellular defense response	12/800	2.14253e-06	5.30478e-05	CCR2/CCR6/MNDA/CLEC5A/LSP1/SPN/NCF2/CXCL9/CCR9/GNLY/LBP/HLA-G	12
BP	GO:0045621	positive regulation of lymphocyte differentiation	17/800	2.64866e-06	6.52304e-05	ADAM8/IL12B/IL2RA/IL18/CCL19/IFNG/CD74/IL2/RUNX1/CD80/HLA-DRA/HLA-DRB1/TNFSF4/FOXP3/TNFSF9/IL4I1/HLA-G	17
BP	GO:0001916	positive regulation of T cell mediated cytotoxicity	9/800	2.79408e-06	6.84475e-05	IL12B/HLA-B/HLA-DRA/HLA-DRB1/CD1C/CD1E/CD1B/CD1A/HLA-G	9
BP	GO:0034612	response to tumor necrosis factor	28/800	2.82781e-06	6.89094e-05	PTGS2/PYDC1/TCL1A/XCL2/CCL19/CCL24/APOB/UBD/TNFRSF17/CCL23/TNFSF11/BIRC3/DCSTAMP/TNFRSF18/CXCL8/CCL13/OCSTAMP/CD70/CCL1/CCL22/CHI3L1/BIRC7/TNFSF18/CCL11/COL1A1/CCL7/CCL20/CCL17	28
BP	GO:0033627	cell adhesion mediated by integrin	15/800	3.094e-06	7.50012e-05	TGFB2/ITGAM/ITGA3/DPP4/ITGB2/ITGB4/ICAM1/CXCL13/ITGBL1/ITGA11/ITGB6/PLAU/ITGA2/SFRP2/MUC1	15
BP	GO:0036230	granulocyte activation	11/800	3.30769e-06	7.97637e-05	FCGR2B/SPI1/ITGAM/IL18/CCR2/ITGB2/ANXA3/CXCL6/CXCL8/PLA2G2A/CD177	11
BP	GO:0002292	T cell differentiation involved in immune response	14/800	3.36546e-06	8.07362e-05	IL12B/IL18/CCL19/SPN/IFNG/CLEC4D/IFNL1/IL2/CD80/HLA-DRA/HLA-DRB1/TNFSF4/BATF/FOXP3	14
BP	GO:2000514	regulation of CD4-positive, alpha-beta T cell activation	13/800	3.4441e-06	8.19254e-05	IL12B/CD274/IL18/CCL19/IFNG/IL2/RUNX1/CD80/HLA-DRA/HLA-DRB1/TNFSF4/CD55/FOXP3	13
BP	GO:0002573	myeloid leukocyte differentiation	25/800	3.45042e-06	8.19254e-05	SPI1/PRTN3/IL12B/GPR68/CCL19/ANXA2/TNFAIP6/IL31RA/IFNG/BATF3/CD74/RUNX1/UBD/ITGB6/HLA-DRB1/OSCAR/CEACAM1/TNFSF11/IL17A/BATF/DCSTAMP/INHBA/CSF2/OCSTAMP/CCN4	25
BP	GO:2000516	positive regulation of CD4-positive, alpha-beta T cell activation	10/800	3.8054e-06	8.98928e-05	IL12B/IL18/CCL19/IFNG/CD80/HLA-DRA/HLA-DRB1/TNFSF4/CD55/FOXP3	10
BP	GO:0046718	viral entry into host cell	20/800	3.86954e-06	9.09441e-05	TRIM10/TMPRSS2/CLEC4G/CLEC5A/CIITA/ICAM1/CD74/CD80/HTR2A/MRC1/ITGB6/ANPEP/HLA-DRB1/CD55/NECTIN4/LDLR/CH25H/ITGA2/FCN1/TMPRSS4	20
BP	GO:0002704	negative regulation of leukocyte mediated immunity	13/800	4.10867e-06	9.59907e-05	FCGR2B/SPI1/CR1L/CLEC4G/CCR2/HLA-B/SERPINB4/NOD2/CD55/CEACAM1/FOXP3/IL4I1/HLA-G	13
BP	GO:0050764	regulation of phagocytosis	16/800	4.12573e-06	9.59907e-05	FCGR2B/PRTN3/SPACA3/SIRPG/C3/HCK/CD300LF/IFNG/C2/IL2RG/NOD2/TGM2/ITGA2/FCN1/FPR2/AZU1	16
BP	GO:0042130	negative regulation of T cell proliferation	13/800	4.88422e-06	0.00011307	CD274/IL2RA/CLEC4G/SPN/CTLA4/CD80/HLA-DRB1/PDCD1LG2/FOXP3/GPNMB/IL4I1/HLA-G/VTCN1	13
BP	GO:0043372	positive regulation of CD4-positive, alpha-beta T cell differentiation	9/800	5.07375e-06	0.000116873	IL12B/IL18/CCL19/IFNG/CD80/HLA-DRA/HLA-DRB1/TNFSF4/FOXP3	9
BP	GO:0044403	biological process involved in symbiotic interaction	30/800	5.2507e-06	0.00012035	CFHR1/TRIM10/TMPRSS2/CLEC4G/CLEC5A/CIITA/ICAM1/CRP/CXCL6/CD74/CD80/HTR2A/MRC1/TREM1/ITGB6/ANPEP/HLA-DRB1/CD55/NECTIN4/LDLR/CH25H/CXCL8/ITGA2/FCN1/KRT6A/TMPRSS4/ELANE/AZU1/FN1/LRRC15	30
BP	GO:0071356	cellular response to tumor necrosis factor	26/800	5.32958e-06	0.000121556	PYDC1/TCL1A/XCL2/CCL19/CCL24/APOB/TNFRSF17/CCL23/TNFSF11/BIRC3/DCSTAMP/TNFRSF18/CXCL8/CCL13/OCSTAMP/CD70/CCL1/CCL22/CHI3L1/BIRC7/TNFSF18/CCL11/COL1A1/CCL7/CCL20/CCL17	26
BP	GO:0002820	negative regulation of adaptive immune response	12/800	5.75108e-06	0.000130527	FCGR2B/CR1L/CLEC4G/IL2/NOD2/TNFSF4/CD55/CEACAM1/FOXP3/IL1RL1/IL4I1/HLA-G	12
BP	GO:0046635	positive regulation of alpha-beta T cell activation	13/800	5.78639e-06	0.000130688	IL12B/IL18/CCR2/CCL19/IFNG/RUNX1/CD80/HLA-DRA/HLA-DRB1/TNFSF4/CD55/EBI3/FOXP3	13
BP	GO:0035710	CD4-positive, alpha-beta T cell activation	16/800	6.14549e-06	0.000137457	IL12B/CD274/IL18/CCL19/RSAD2/SPN/IFNG/IL2/RUNX1/CD80/HLA-DRA/HLA-DRB1/TNFSF4/CD55/BATF/FOXP3	16
BP	GO:1902106	negative regulation of leukocyte differentiation	16/800	6.14549e-06	0.000137457	FCGR2B/TMEM176B/GPR68/TMEM176A/TNFAIP6/LAG3/CTLA4/IFNL1/CD74/IL2/RUNX1/TNFSF4/CEACAM1/FOXP3/INHBA/HLA-G	16
BP	GO:0042119	neutrophil activation	10/800	6.21195e-06	0.000138276	FCGR2B/SPI1/ITGAM/IL18/ITGB2/ANXA3/CXCL6/CXCL8/PLA2G2A/CD177	10
BP	GO:0043370	regulation of CD4-positive, alpha-beta T cell differentiation	11/800	6.3131e-06	0.000139855	IL12B/IL18/CCL19/IFNG/IL2/RUNX1/CD80/HLA-DRA/HLA-DRB1/TNFSF4/FOXP3	11
BP	GO:0052126	movement in host environment	22/800	6.54597e-06	0.000144323	TRIM10/TMPRSS2/CLEC4G/CLEC5A/CIITA/ICAM1/CD74/CD80/HTR2A/MRC1/ITGB6/ANPEP/HLA-DRB1/CD55/NECTIN4/LDLR/CH25H/CXCL8/ITGA2/FCN1/KRT6A/TMPRSS4	22
BP	GO:0050730	regulation of peptidyl-tyrosine phosphorylation	28/800	7.01891e-06	0.000154017	IL12B/GRM5/OSM/IL18/CRLF1/ITGB2/FGF10/EFNA5/ADRA2A/ERBB3/IL31RA/IFNG/CNTN1/IFNL1/CD74/IL2/CD80/HTR2A/NOD2/IL11/CLEC6A/TNFRSF18/CSF2/GREM1/TNFSF18/IL22RA2/SFRP2/EREG	28
BP	GO:0050766	positive regulation of phagocytosis	13/800	8.04224e-06	0.000175639	FCGR2B/SPACA3/SIRPG/C3/CD300LF/IFNG/C2/IL2RG/NOD2/ITGA2/FCN1/FPR2/AZU1	13
BP	GO:0071675	regulation of mononuclear cell migration	17/800	8.15588e-06	0.000177285	SPI1/SLAMF8/ADAM8/LGALS3/XCL2/CCR2/CCR6/SPN/CXCL13/CXCL10/NBL1/FPR2/GREM1/CCL1/CCL7/CCL20/CXCL17	17
BP	GO:0043367	CD4-positive, alpha-beta T cell differentiation	14/800	8.49957e-06	0.000183893	IL12B/IL18/CCL19/RSAD2/SPN/IFNG/IL2/RUNX1/CD80/HLA-DRA/HLA-DRB1/TNFSF4/BATF/FOXP3	14
BP	GO:0070555	response to interleukin-1	19/800	8.56078e-06	0.000184355	XCL2/CCL19/CCL24/ZBP1/NLRP7/FGG/CCL23/FGB/IL17A/CXCL8/CCL13/IL1RN/CCL1/CCL22/CHI3L1/CCL11/CCL7/CCL20/CCL17	19
BP	GO:0046634	regulation of alpha-beta T cell activation	16/800	9.00699e-06	0.000193066	IL12B/CD274/IL18/CCR2/CCL19/ZNF683/IFNG/IL2/RUNX1/CD80/HLA-DRA/HLA-DRB1/TNFSF4/CD55/EBI3/FOXP3	16
BP	GO:0002764	immune response-regulating signaling pathway	42/800	9.31937e-06	0.000198842	FCGR2B/SLA2/LGALS3/TNIP3/OASL/FPR3/LAX1/MNDA/RSAD2/TRIM15/NCR3/FCHO1/HCK/CARD11/CD300LF/INAVA/CTLA4/CLEC4D/GPR33/NOD2/HLA-DPB1/PIGR/HLA-DRB1/CLEC6A/CEACAM1/COLEC12/BIRC3/CD79A/HLA-DQB1/FOXP3/MYO1G/FCN1/FPR2/IGLL1/LBP/KCNN4/PLPP4/BPIFB1/IGLL5/HLA-G/PSG9/VTCN1	42
BP	GO:0002690	positive regulation of leukocyte chemotaxis	15/800	9.62163e-06	0.000204349	SPI1/XCL2/RAC2/CCR2/CCR6/CCL19/CXCL13/CD74/CXCL10/CXCL8/FPR2/LBP/CCL1/CCL7/CXCL17	15
BP	GO:1903707	negative regulation of hemopoiesis	16/800	1.01961e-05	0.000215561	FCGR2B/TMEM176B/GPR68/TMEM176A/TNFAIP6/LAG3/CTLA4/IFNL1/CD74/IL2/RUNX1/TNFSF4/CEACAM1/FOXP3/INHBA/HLA-G	16
BP	GO:0050728	negative regulation of inflammatory response	22/800	1.02807e-05	0.000215724	FCGR2B/SLAMF8/CST7/IL12B/C1QTNF12/PROC/IL2RA/NT5E/TNFAIP6/HCK/IL2/NOD2/FFAR4/HLA-DRB1/LDLR/FOXP3/FPR2/ELANE/IL22RA2/SAA1/ALOX5/CXCL17	22
BP	GO:0071346	cellular response to interferon-gamma	17/800	1.0297e-05	0.000215724	IL12B/XCL2/GBP5/CCL19/CCL24/HCK/IFNG/MRC1/CCL23/HLA-DPA1/CCL13/CCL1/CCL22/CCL11/CCL7/CCL20/CCL17	17
BP	GO:0002446	neutrophil mediated immunity	9/800	1.13871e-05	0.000237488	SPI1/ITGAM/ITGB2/ANXA3/CXCL6/TREM1/ELANE/AZU1/CD177	9
BP	GO:0007229	integrin-mediated signaling pathway	16/800	1.15231e-05	0.000239077	CDH17/DST/ITGAM/ITGA3/ISG15/ITGB2/HCK/ITGB4/ITGBL1/ITGA11/ITGB6/CEACAM1/ITGA2/COL3A1/FN1/CD177	16
BP	GO:0031348	negative regulation of defense response	28/800	1.15666e-05	0.000239077	FCGR2B/SLAMF8/CST7/IL12B/C1QTNF12/PROC/IL2RA/NT5E/ISG15/HLA-B/TNFAIP6/HCK/SERPINB4/IL2/NOD2/FFAR4/MMP12/HLA-DRB1/CEACAM1/LDLR/FOXP3/FPR2/ELANE/IL22RA2/HLA-G/SAA1/ALOX5/CXCL17	28
BP	GO:0043011	myeloid dendritic cell differentiation	7/800	1.17312e-05	0.000240333	SPI1/BATF3/UBD/ITGB6/BATF/DCSTAMP/CSF2	7
BP	GO:0045591	positive regulation of regulatory T cell differentiation	7/800	1.17312e-05	0.000240333	IFNG/IL2/HLA-DRA/HLA-DRB1/FOXP3/IL4I1/HLA-G	7
BP	GO:0009620	response to fungus	12/800	1.38797e-05	0.000283096	SPI1/ZBP1/CLEC4D/CLEC4C/CLEC6A/IL17A/S100A8/IL36RN/S100A9/GNLY/ELANE/NLRP10	12
BP	GO:0090025	regulation of monocyte chemotaxis	8/800	1.51068e-05	0.000303652	SLAMF8/CCR2/CXCL10/NBL1/FPR2/GREM1/CCL1/CXCL17	8
BP	GO:0002920	regulation of humoral immune response	10/800	1.51498e-05	0.000303652	FCGR2B/CR1L/C3/CXCL13/KLK7/CFH/NOD2/CD55/IL17A/LTA	10
BP	GO:0032620	interleukin-17 production	10/800	1.51498e-05	0.000303652	IL12B/OSM/IL18/IFNG/IL2/NOD2/TNFSF4/FOXP3/IL36RN/CCL1	10
BP	GO:0032660	regulation of interleukin-17 production	10/800	1.51498e-05	0.000303652	IL12B/OSM/IL18/IFNG/IL2/NOD2/TNFSF4/FOXP3/IL36RN/CCL1	10
BP	GO:0002707	negative regulation of lymphocyte mediated immunity	11/800	1.66547e-05	0.000332377	FCGR2B/CR1L/CLEC4G/HLA-B/SERPINB4/NOD2/CD55/CEACAM1/FOXP3/IL4I1/HLA-G	11
BP	GO:0050878	regulation of body fluid levels	35/800	1.79972e-05	0.000357627	PTPRO/PROC/MET/TFPI2/FBLN1/SCNN1A/FGF10/HPSE/ADRA2A/AQP3/TIFAB/FGG/F2RL2/PROS1/PLAUR/PLAU/GRHL3/FGB/CEACAM1/SERPINA1/ABCA12/COMP/KRT16/CFTR/TMPRSS11F/ITGA2/ANXA8/KCNN4/XDH/COL3A1/FAP/FN1/SFN/SERPINB2/SAA1	35
BP	GO:0045088	regulation of innate immune response	25/800	1.84856e-05	0.000365763	FCGR2B/SPI1/SLAMF8/ADAM8/IL12B/GBP5/MNDA/NCR3/ISG15/HLA-B/HCK/SERPINB4/LAG3/ZBP1/CFH/NOD2/MMP12/CLEC6A/CEACAM1/BIRC3/FCN1/FPR2/LBP/EREG/HLA-G	25
BP	GO:0045730	respiratory burst	9/800	1.85864e-05	0.000366192	SLAMF8/CYBB/RAC2/HCK/NCF2/CD52/CD55/JCHAIN/LBP	9
BP	GO:0043903	regulation of biological process involved in symbiotic interaction	11/800	1.99375e-05	0.000391146	TRIM10/TMPRSS2/CIITA/CXCL6/CD74/HLA-DRB1/CH25H/CXCL8/FCN1/KRT6A/TMPRSS4	11
BP	GO:0002825	regulation of T-helper 1 type immune response	8/800	2.00876e-05	0.000392429	IL12B/IL18/CCR2/CCL19/CD80/TNFSF4/IL1RL1/NLRP10	8
BP	GO:0002468	dendritic cell antigen processing and presentation	6/800	2.09631e-05	0.000404413	FCGR2B/CCL19/CD74/NOD2/HLA-DRA/HLA-DRB1	6
BP	GO:0002517	T cell tolerance induction	6/800	2.09631e-05	0.000404413	ICOS/IL2RA/HLA-B/CLC/FOXP3/HLA-G	6
BP	GO:1902563	regulation of neutrophil activation	6/800	2.09631e-05	0.000404413	FCGR2B/SPI1/ITGAM/ITGB2/PLA2G2A/CD177	6
BP	GO:0051701	biological process involved in interaction with host	22/800	2.21187e-05	0.000424936	TRIM10/TMPRSS2/CLEC4G/CLEC5A/CIITA/ICAM1/CD74/CD80/HTR2A/MRC1/ITGB6/ANPEP/HLA-DRB1/CD55/NECTIN4/LDLR/CH25H/CXCL8/ITGA2/FCN1/KRT6A/TMPRSS4	22
BP	GO:0002294	CD4-positive, alpha-beta T cell differentiation involved in immune response	12/800	2.25457e-05	0.000427814	IL12B/IL18/CCL19/SPN/IFNG/IL2/CD80/HLA-DRA/HLA-DRB1/TNFSF4/BATF/FOXP3	12
BP	GO:0046637	regulation of alpha-beta T cell differentiation	12/800	2.25457e-05	0.000427814	IL12B/IL18/CCL19/ZNF683/IFNG/IL2/RUNX1/CD80/HLA-DRA/HLA-DRB1/TNFSF4/FOXP3	12
BP	GO:0072678	T cell migration	12/800	2.25457e-05	0.000427814	ADAM8/XCL2/CCR2/CCR6/ICAM1/SPN/CXCL13/XG/CXCL10/MYO1G/CXCL11/CCL20	12
BP	GO:0045622	regulation of T-helper cell differentiation	9/800	2.34418e-05	0.000443003	IL12B/IL18/CCL19/IL2/CD80/HLA-DRA/HLA-DRB1/TNFSF4/FOXP3	9
BP	GO:0002287	alpha-beta T cell activation involved in immune response	12/800	2.63303e-05	0.00049356	IL12B/IL18/CCL19/SPN/IFNG/IL2/CD80/HLA-DRA/HLA-DRB1/TNFSF4/BATF/FOXP3	12
BP	GO:0002293	alpha-beta T cell differentiation involved in immune response	12/800	2.63303e-05	0.00049356	IL12B/IL18/CCL19/SPN/IFNG/IL2/CD80/HLA-DRA/HLA-DRB1/TNFSF4/BATF/FOXP3	12
BP	GO:0006953	acute-phase response	10/800	2.76716e-05	0.000516611	PTGS2/CRP/TNFSF11/PTGES/SERPINA1/LBP/SAA4/FN1/SAA1/SAA2	10
BP	GO:0002768	immune response-regulating cell surface receptor signaling pathway	31/800	2.9595e-05	0.0005503	FCGR2B/SLA2/LGALS3/FPR3/LAX1/MNDA/NCR3/FCHO1/HCK/CARD11/CTLA4/CLEC4D/GPR33/HLA-DPB1/PIGR/HLA-DRB1/CLEC6A/CEACAM1/CD79A/HLA-DQB1/FOXP3/MYO1G/FCN1/FPR2/IGLL1/KCNN4/PLPP4/IGLL5/HLA-G/PSG9/VTCN1	31
BP	GO:0002444	myeloid leukocyte mediated immunity	15/800	3.32803e-05	0.000613895	FCGR2B/SPI1/MILR1/ITGAM/RAC2/CCR2/ITGB2/ANXA3/C3/MRGPRX2/CXCL6/TREM1/ELANE/AZU1/CD177	15
BP	GO:0007200	phospholipase C-activating G protein-coupled receptor signaling pathway	15/800	3.32803e-05	0.000613895	HRH1/GRM5/FPR3/ADRA2A/GPR33/HTR2A/FFAR4/F2RL2/GNA15/DRD5/CCKAR/TGM2/FPR2/P2RY6/GRP	15
BP	GO:0002507	tolerance induction	8/800	3.42326e-05	0.000628956	CD274/ICOS/IL2RA/HLA-B/CLC/FOXP3/HLA-G/PSG9	8
BP	GO:0046638	positive regulation of alpha-beta T cell differentiation	10/800	4.02395e-05	0.0007335	IL12B/IL18/CCL19/IFNG/RUNX1/CD80/HLA-DRA/HLA-DRB1/TNFSF4/FOXP3	10
BP	GO:0052372	modulation by symbiont of entry into host	10/800	4.02395e-05	0.0007335	TRIM10/TMPRSS2/CIITA/CD74/HLA-DRB1/CH25H/CXCL8/FCN1/KRT6A/TMPRSS4	10
BP	GO:0042116	macrophage activation	15/800	4.17978e-05	0.000758916	FCGR2B/CST7/SPACA3/ITGAM/ITGB2/IL31RA/CTSC/IFNG/CD74/LDLR/IL1RL1/CSF2/FPR2/LBP/AZU1	15
BP	GO:0016485	protein processing	25/800	4.33774e-05	0.00078452	TMPRSS2/ADAM8/CST7/C1R/DPP4/ANXA2/MME/PRSS3/PERP/NLRP7/RUNX1/MMP16/FGG/PRSS12/PLAU/FGB/PCSK9/CTSE/COMP/NKD2/CORIN/S100A10/TMPRSS4/KLK1/SPON1	25
BP	GO:0046631	alpha-beta T cell activation	19/800	4.35931e-05	0.000785354	IL12B/CD274/IL18/CCR2/CCL19/RSAD2/ZNF683/SPN/IFNG/IL2/RUNX1/CD80/HLA-DRA/HLA-DRB1/TNFSF4/CD55/BATF/EBI3/FOXP3	19
BP	GO:0043277	apoptotic cell clearance	10/800	4.81656e-05	0.000864368	RAC2/CCR2/C3/MEGF10/CD300LF/C2/TGM2/FCN1/MARCO/XKR4	10
BP	GO:0043589	skin morphogenesis	5/800	5.13839e-05	0.000918562	ITGB4/CDSN/COL1A2/ITGA2/COL1A1	5
BP	GO:0150076	neuroinflammatory response	12/800	5.47154e-05	0.000974354	PTGS2/CST7/ITGAM/IL18/ITGB2/CTSC/IFNG/LDLR/FPR2/ADCY8/AZU1/MMP3	12
BP	GO:0032689	negative regulation of interferon-gamma production	9/800	5.50451e-05	0.000976471	CD274/NOD2/HLA-DRB1/PDCD1LG2/TNFSF4/FOXP3/IL1RL1/INHBA/IL36RN	9
BP	GO:0090022	regulation of neutrophil chemotaxis	8/800	5.58683e-05	0.00098729	RAC2/CCL19/DPP4/TNFAIP6/CD74/NOD2/CXCL8/LBP	8
BP	GO:0051480	regulation of cytosolic calcium ion concentration	32/800	5.8856e-05	0.00103613	GRM5/FPR3/CCR2/CCR6/CALB2/CCL19/NPSR1/NTSR1/CXCL13/CXCL9/JSRP1/GPR33/IL2/HTR2A/CXCL10/FFAR4/F2RL2/GNA15/MCHR1/CD52/CD55/JPH3/LPAR3/SLC24A2/CXCL11/CCR8/CCR9/FPR2/ADCY8/P2RY6/CCL1/SAA1	32
BP	GO:0007204	positive regulation of cytosolic calcium ion concentration	30/800	6.12581e-05	0.00107434	FPR3/CCR2/CCR6/CCL19/NPSR1/NTSR1/CXCL13/CXCL9/JSRP1/GPR33/IL2/HTR2A/CXCL10/FFAR4/F2RL2/GNA15/MCHR1/CD52/CD55/JPH3/LPAR3/SLC24A2/CXCL11/CCR8/CCR9/FPR2/ADCY8/P2RY6/CCL1/SAA1	30
BP	GO:0032613	interleukin-10 production	11/800	6.28708e-05	0.00109433	FCGR2B/IL12B/CD274/ISG15/TIGIT/INAVA/NOD2/HLA-DRB1/PDCD1LG2/TNFSF4/FOXP3	11
BP	GO:0032653	regulation of interleukin-10 production	11/800	6.28708e-05	0.00109433	FCGR2B/IL12B/CD274/ISG15/TIGIT/INAVA/NOD2/HLA-DRB1/PDCD1LG2/TNFSF4/FOXP3	11
BP	GO:0071604	transforming growth factor beta production	9/800	6.70125e-05	0.00116205	TGFB2/PTGS2/ITGB6/FOXP3/SERPINB7/LUM/COL3A1/FN1/PSG9	9
BP	GO:0046632	alpha-beta T cell differentiation	15/800	7.19709e-05	0.00124338	IL12B/IL18/CCL19/RSAD2/ZNF683/SPN/IFNG/IL2/RUNX1/CD80/HLA-DRA/HLA-DRB1/TNFSF4/BATF/FOXP3	15
BP	GO:0031638	zymogen activation	11/800	7.30388e-05	0.00125714	C1R/ANXA2/PRSS3/PERP/RUNX1/FGG/PRSS12/PLAU/FGB/S100A10/KLK1	11
BP	GO:0019233	sensory perception of pain	14/800	7.52995e-05	0.00129125	NTRK1/PTGS2/IL12B/CCR2/MME/NTSR1/MRGPRX2/SCN1A/HTR2A/OPRPN/PTGES/KCND2/ITGA2/HOXD1	14
BP	GO:0043299	leukocyte degranulation	12/800	8.21522e-05	0.00140356	FCGR2B/SPI1/MILR1/ITGAM/RAC2/CCR2/ITGB2/ANXA3/HCK/MRGPRX2/CEACAM1/CD177	12
BP	GO:0002367	cytokine production involved in immune response	14/800	8.41889e-05	0.0014311	TGFB2/IL18/CCR2/RSAD2/INAVA/CD74/NOD2/TREM1/TNFSF4/CD55/CLC/FOXP3/SLAMF9/HLA-G	14
BP	GO:0042093	T-helper cell differentiation	11/800	8.45822e-05	0.0014311	IL12B/IL18/CCL19/SPN/IL2/CD80/HLA-DRA/HLA-DRB1/TNFSF4/BATF/FOXP3	11
BP	GO:0043312	neutrophil degranulation	5/800	8.50007e-05	0.0014311	SPI1/ITGAM/ITGB2/ANXA3/CD177	5
BP	GO:0043380	regulation of memory T cell differentiation	5/800	8.50007e-05	0.0014311	IL12B/IFNL1/HLA-DRA/HLA-DRB1/TNFSF4	5
BP	GO:1903900	regulation of viral life cycle	17/800	8.77256e-05	0.00147163	TRIM10/TMPRSS2/OASL/CLEC4G/RSAD2/TRIM15/ISG15/APOBEC3A/CIITA/CD74/HLA-DRB1/CH25H/CXCL8/IFNL3/FCN1/TMPRSS4/SLPI	17
BP	GO:0032729	positive regulation of interferon-gamma production	12/800	9.36077e-05	0.00156463	IL12B/IL18/CCR2/ISG15/CD2/IFNL1/IL2/HLA-DPB1/TNFSF4/HLA-DPA1/EBI3/LTA	12
BP	GO:0001706	endoderm formation	10/800	9.45466e-05	0.00156549	LAMB3/DUSP5/ITGB2/COL5A2/COL12A1/LHX1/COL5A1/INHBA/FN1/COL11A1	10
BP	GO:0002763	positive regulation of myeloid leukocyte differentiation	10/800	9.45466e-05	0.00156549	IL12B/GPR68/IFNG/CD74/RUNX1/HLA-DRB1/TNFSF11/IL17A/DCSTAMP/OCSTAMP	10
BP	GO:0019058	viral life cycle	29/800	9.46733e-05	0.00156549	TRIM10/TMPRSS2/OASL/CLEC4G/RSAD2/TRIM15/ISG15/CLEC5A/APOBEC3A/CIITA/ICAM1/CD74/CD80/HTR2A/MRC1/ITGB6/ANPEP/HLA-DRB1/CD55/NECTIN4/LDLR/CH25H/CXCL8/IFNL3/ITGA2/FCN1/TMPRSS4/SLPI/LRRC15	29
BP	GO:0045089	positive regulation of innate immune response	17/800	9.59748e-05	0.00158136	SPI1/ADAM8/IL12B/GBP5/MNDA/NCR3/HCK/LAG3/ZBP1/NOD2/MMP12/CLEC6A/FCN1/FPR2/LBP/EREG/HLA-G	17
BP	GO:0046006	regulation of activated T cell proliferation	9/800	9.75817e-05	0.00160214	IL12B/CD274/IL2RA/IL18/IL2/PDCD1LG2/CLC/FOXP3/TNFSF9	9
BP	GO:0002710	negative regulation of T cell mediated immunity	7/800	0.000103536	0.0016939	FCGR2B/CLEC4G/NOD2/CEACAM1/FOXP3/IL4I1/HLA-G	7
BP	GO:0042531	positive regulation of tyrosine phosphorylation of STAT protein	11/800	0.000112403	0.00183248	IL12B/OSM/IL18/CRLF1/IL31RA/IFNG/IFNL1/IL2/TNFRSF18/CSF2/TNFSF18	11
BP	GO:0031214	biomineral tissue development	19/800	0.000118048	0.00191776	PTGS2/ISG15/BMPR1B/IBSP/OMD/RFLNA/ITGB6/COMP/ASPN/CFTR/COL1A2/GREM1/AMTN/LOX/COL1A1/PTH/MMP20/ALOX5/MMP13	19
BP	GO:0042476	odontogenesis	16/800	0.00013008	0.00210585	TGFB2/WNT10A/FST/FGF10/AQP3/PERP/ITGB6/PITX2/TNFSF11/ASPN/CFTR/INHBA/COL1A2/AMTN/COL1A1/MMP20	16
BP	GO:0002664	regulation of T cell tolerance induction	5/800	0.000133292	0.0021259	IL2RA/HLA-B/CLC/FOXP3/HLA-G	5
BP	GO:0043379	memory T cell differentiation	5/800	0.000133292	0.0021259	IL12B/IFNL1/HLA-DRA/HLA-DRB1/TNFSF4	5
BP	GO:2001198	regulation of dendritic cell differentiation	5/800	0.000133292	0.0021259	FCGR2B/TMEM176B/TMEM176A/HLA-B/HLA-G	5
BP	GO:0042092	type 2 immune response	8/800	0.000133615	0.0021259	IL18/CCR2/RSAD2/IFNL1/CD74/NOD2/TNFSF4/BATF	8
BP	GO:2000403	positive regulation of lymphocyte migration	8/800	0.000133615	0.0021259	ADAM8/XCL2/CCR2/SPN/CXCL13/CXCL10/CCL7/CCL20	8
BP	GO:0002577	regulation of antigen processing and presentation	6/800	0.000135216	0.00213669	FCGR2B/CCL19/CD74/HLA-DOB/NOD2/HLA-DOA	6
BP	GO:0002643	regulation of tolerance induction	6/800	0.000135216	0.00213669	CD274/IL2RA/HLA-B/CLC/FOXP3/HLA-G	6
BP	GO:0110148	biomineralization	19/800	0.000137889	0.00217152	PTGS2/ISG15/BMPR1B/IBSP/OMD/RFLNA/ITGB6/COMP/ASPN/CFTR/COL1A2/GREM1/AMTN/LOX/COL1A1/PTH/MMP20/ALOX5/MMP13	19
BP	GO:0048771	tissue remodeling	19/800	0.000160608	0.00252072	ADAM8/IL12B/CTSK/IL18/CCR2/MC4R/FGF10/WNT16/IL2/RUNX1/CEACAM1/TNFSF11/SEMA3C/DCSTAMP/ELF3/GPNMB/CTHRC1/GREM1/PTH	19
BP	GO:0050798	activated T cell proliferation	9/800	0.000164759	0.00257714	IL12B/CD274/IL2RA/IL18/IL2/PDCD1LG2/CLC/FOXP3/TNFSF9	9
BP	GO:0035773	insulin secretion involved in cellular response to glucose stimulus	10/800	0.000174203	0.0027157	C1QTNF12/GPR68/EFNA5/ADRA2A/HLA-DRB1/ABCA12/CFTR/VSNL1/ADCY8/PTPRN	10
BP	GO:1900047	negative regulation of hemostasis	9/800	0.000194302	0.00301886	PROC/FGG/PROS1/PLAU/FGB/CEACAM1/COMP/FAP/SERPINB2	9
BP	GO:0042509	regulation of tyrosine phosphorylation of STAT protein	12/800	0.000195418	0.00302604	IL12B/OSM/IL18/CRLF1/IL31RA/IFNG/IFNL1/IL2/TNFRSF18/CSF2/TNFSF18/IL22RA2	12
BP	GO:0002475	antigen processing and presentation via MHC class Ib	5/800	0.000200095	0.00306768	CD1C/CD1E/CD1B/CD1A/HLA-G	5
BP	GO:0072672	neutrophil extravasation	5/800	0.000200095	0.00306768	PRTN3/ADAM8/JAML/XG/CD177	5
BP	GO:0090715	immunological memory formation process	5/800	0.000200095	0.00306768	IL12B/IFNL1/HLA-DRA/HLA-DRB1/TNFSF4	5
BP	GO:0019731	antibacterial humoral response	10/800	0.000201185	0.00307421	DEFB1/KLK7/NOD2/RNASE3/FGB/PI3/JCHAIN/WFDC10B/ELANE/SLPI	10
BP	GO:0031589	cell-substrate adhesion	31/800	0.000203056	0.0030926	PTPRO/ITGAM/RAC2/FBLN1/LAMB3/ITGA3/EGFL6/ITGB2/TACSTD2/HPSE/ITGB4/EFNA5/ITGBL1/FGG/SPOCK2/ITGA11/EPHB3/MMP12/L1CAM/ITGB6/PLAU/FGB/MYO1G/S100A10/ITGA2/COL3A1/GREM1/CDKN2A/COL1A1/FN1/CEACAM6	31
BP	GO:0002429	immune response-activating cell surface receptor signaling pathway	27/800	0.000212723	0.00321866	FCGR2B/SLA2/LGALS3/FPR3/LAX1/MNDA/NCR3/FCHO1/HCK/CARD11/CTLA4/GPR33/HLA-DPB1/HLA-DRB1/CLEC6A/CEACAM1/CD79A/HLA-DQB1/FOXP3/MYO1G/FCN1/FPR2/IGLL1/KCNN4/PLPP4/IGLL5/VTCN1	27
BP	GO:0002757	immune response-activating signal transduction	27/800	0.000212723	0.00321866	FCGR2B/SLA2/LGALS3/FPR3/LAX1/MNDA/NCR3/FCHO1/HCK/CARD11/CTLA4/GPR33/HLA-DPB1/HLA-DRB1/CLEC6A/CEACAM1/CD79A/HLA-DQB1/FOXP3/MYO1G/FCN1/FPR2/IGLL1/KCNN4/PLPP4/IGLL5/VTCN1	27
BP	GO:0061178	regulation of insulin secretion involved in cellular response to glucose stimulus	9/800	0.000228121	0.00344039	C1QTNF12/GPR68/EFNA5/ADRA2A/HLA-DRB1/ABCA12/CFTR/VSNL1/ADCY8	9
BP	GO:0001704	formation of primary germ layer	15/800	0.000231565	0.003481	LAMB3/TRIM15/DUSP5/ITGA3/ITGB2/ITGB4/COL5A2/COL12A1/LHX1/COL5A1/INHBA/ITGA2/SFRP2/FN1/COL11A1	15
BP	GO:0032732	positive regulation of interleukin-1 production	11/800	0.000246914	0.00368777	PYDC1/GBP5/CCL19/MNDA/IFNG/INAVA/NOD2/IL17A/AZU1/NLRP10/SAA1	11
BP	GO:0045123	cellular extravasation	11/800	0.000246914	0.00368777	PRTN3/ADAM8/CCR2/ICAM1/SPN/JAML/XG/FUT9/ELANE/AZU1/CD177	11
BP	GO:0060348	bone development	22/800	0.000254184	0.00378415	CDX1/GPR68/ANXA2/BMPR1B/TIFAB/MMP16/RFLNA/ITGB6/PITX2/TNFSF11/COMP/TGM2/SFRP4/CCN4/COL3A1/GREM1/LOX/COL1A1/SFRP2/PTH/MMP13/EPYC	22
BP	GO:0032602	chemokine production	13/800	0.000258797	0.00384048	IL18/IFNG/CXCL6/CD74/NOD2/TREM1/TNFSF4/IL17A/IL1RL1/ALOX15B/LBP/ELANE/AZU1	13
BP	GO:2000406	positive regulation of T cell migration	7/800	0.00026428	0.00390931	ADAM8/XCL2/CCR2/SPN/CXCL13/CXCL10/CCL20	7
BP	GO:0071622	regulation of granulocyte chemotaxis	9/800	0.000266683	0.0039323	RAC2/CCL19/DPP4/TNFAIP6/CD74/NOD2/CXCL8/LBP/CXCL17	9
BP	GO:0032905	transforming growth factor beta1 production	5/800	0.000289661	0.00425755	FOXP3/SERPINB7/LUM/COL3A1/PSG9	5
BP	GO:0009914	hormone transport	26/800	0.000293543	0.00430097	C1QTNF12/OSM/GPR68/MC4R/EFNA5/ADRA2A/SLCO4A1/IFNG/FGG/FFAR4/IL11/HLA-DRB1/FGB/TNFSF11/CGA/ABCA12/CCKAR/CFTR/INHBA/VSNL1/ADCY8/IL1RN/GRP/PTPRN/ALOX5/RETN	26
BP	GO:0032615	interleukin-12 production	10/800	0.000304032	0.00442663	IL12B/CCL19/HLA-B/TIGIT/IFNG/NOD2/TNFSF4/IL17A/LTB/HLA-G	10
BP	GO:0032655	regulation of interleukin-12 production	10/800	0.000304032	0.00442663	IL12B/CCL19/HLA-B/TIGIT/IFNG/NOD2/TNFSF4/IL17A/LTB/HLA-G	10
BP	GO:0007260	tyrosine phosphorylation of STAT protein	12/800	0.000306456	0.00444793	IL12B/OSM/IL18/CRLF1/IL31RA/IFNG/IFNL1/IL2/TNFRSF18/CSF2/TNFSF18/IL22RA2	12
BP	GO:0046641	positive regulation of alpha-beta T cell proliferation	6/800	0.000315685	0.0045654	IL12B/IL18/CCR2/TNFSF4/CD55/EBI3	6
BP	GO:0007188	adenylate cyclase-modulating G protein-coupled receptor signaling pathway	23/800	0.000316521	0.0045654	LGR5/GRM5/MC4R/ADRA2A/CXCL9/CXCL10/GNA15/MCHR1/UCN2/HTR1D/LPAR3/NPY2R/ADGRE3/INSL3/DRD5/GPR12/CXCL11/FPR2/RXFP2/ADCY8/MARCO/ADRB3/PTH	23
BP	GO:0061448	connective tissue development	24/800	0.000323096	0.00464576	SPI1/MATN3/CTSK/BMPR1B/FOXA1/RUNX1/RFLNA/COMP/COL5A1/SERPINB7/CCN4/COL3A1/GREM1/WT1/LOX/CHI3L1/COL1A1/NKX3-2/SFRP2/PTH/WNT7A/COL11A1/MMP13/EPYC	24
BP	GO:0002828	regulation of type 2 immune response	7/800	0.000325971	0.00465817	IL18/CCR2/RSAD2/IFNL1/CD74/NOD2/TNFSF4	7
BP	GO:1902624	positive regulation of neutrophil migration	7/800	0.000325971	0.00465817	ADAM8/RAC2/CCL19/XG/CD74/CXCL8/LBP	7
BP	GO:0030099	myeloid cell differentiation	32/800	0.000329293	0.00469116	TRIM10/SPI1/PRTN3/IL12B/GPR68/TSPO2/CCL19/ANXA2/ISG15/CLEC5A/TNFAIP6/CDKN2B/IL31RA/IFNG/BATF3/CD74/RUNX1/UBD/IL11/ITGB6/HLA-DRB1/OSCAR/CEACAM1/TNFSF11/IL17A/BATF/DCSTAMP/INHBA/CSF2/OCSTAMP/CCN4/LOX	32
BP	GO:0032735	positive regulation of interleukin-12 production	8/800	0.000338485	0.00480732	IL12B/CCL19/IFNG/NOD2/TNFSF4/IL17A/LTB/HLA-G	8
BP	GO:0050918	positive chemotaxis	10/800	0.000346808	0.00491047	SCG2/LGALS3/MET/FGF10/CXCL10/CXCL8/GPNMB/ITGA2/FPR2/AZU1	10
BP	GO:0032612	interleukin-1 production	15/800	0.000390265	0.00549218	PYDC1/GBP5/CCL19/MNDA/IFNG/INAVA/NLRP7/CARD17/NOD2/FFAR4/CEACAM1/IL17A/AZU1/NLRP10/SAA1	15
BP	GO:0032652	regulation of interleukin-1 production	15/800	0.000390265	0.00549218	PYDC1/GBP5/CCL19/MNDA/IFNG/INAVA/NLRP7/CARD17/NOD2/FFAR4/CEACAM1/IL17A/AZU1/NLRP10/SAA1	15
BP	GO:0046596	regulation of viral entry into host cell	8/800	0.000400536	0.00561964	TRIM10/TMPRSS2/CIITA/CD74/HLA-DRB1/CH25H/FCN1/TMPRSS4	8
BP	GO:0002922	positive regulation of humoral immune response	6/800	0.000405873	0.00562633	FCGR2B/C3/KLK7/NOD2/IL17A/LTA	6
BP	GO:0032740	positive regulation of interleukin-17 production	6/800	0.000405873	0.00562633	IL12B/OSM/IL18/IL2/NOD2/CCL1	6
BP	GO:0042730	fibrinolysis	6/800	0.000405873	0.00562633	FGG/PROS1/PLAU/FGB/FAP/SERPINB2	6
BP	GO:0045672	positive regulation of osteoclast differentiation	6/800	0.000405873	0.00562633	IL12B/GPR68/IFNG/TNFSF11/IL17A/OCSTAMP	6
BP	GO:0046879	hormone secretion	25/800	0.000427149	0.00590358	C1QTNF12/OSM/GPR68/MC4R/EFNA5/ADRA2A/IFNG/FGG/FFAR4/IL11/HLA-DRB1/FGB/TNFSF11/CGA/ABCA12/CCKAR/CFTR/INHBA/VSNL1/ADCY8/IL1RN/GRP/PTPRN/ALOX5/RETN	25
BP	GO:0043123	positive regulation of I-kappaB kinase/NF-kappaB signaling	19/800	0.000433716	0.0059765	NEK6/CCL19/LURAP1L/SECTM1/PIM2/S100A4/CARD11/INAVA/CLEC4D/CD74/NOD2/UBD/HLA-DRB1/CLEC6A/ROR1/TNFSF11/BIRC3/UNC5CL/S100B	19
BP	GO:0050792	regulation of viral process	17/800	0.000446834	0.00612985	TRIM10/TMPRSS2/OASL/CLEC4G/RSAD2/TRIM15/ISG15/APOBEC3A/CIITA/CD74/HLA-DRB1/CH25H/CXCL8/IFNL3/FCN1/TMPRSS4/SLPI	17
BP	GO:0030104	water homeostasis	10/800	0.000447492	0.00612985	MET/SCNN1A/AQP3/GRHL3/ABCA12/KRT16/CFTR/TMPRSS11F/AQP9/SFN	10
BP	GO:2000404	regulation of T cell migration	8/800	0.000471523	0.00643997	ADAM8/XCL2/CCR2/CCR6/SPN/CXCL13/CXCL10/CCL20	8
BP	GO:0045620	negative regulation of lymphocyte differentiation	9/800	0.000478911	0.00652164	LAG3/CTLA4/IFNL1/CD74/IL2/RUNX1/TNFSF4/FOXP3/INHBA	9
BP	GO:0014068	positive regulation of phosphatidylinositol 3-kinase signaling	11/800	0.000497674	0.00675727	TGFB2/NTRK1/DCN/OSM/IL18/HCST/WNT16/ERBB3/ROR1/SERPINA12/FN1	11
BP	GO:0007596	blood coagulation	21/800	0.000509758	0.00690111	PROC/TFPI2/FBLN1/HPSE/ADRA2A/FGG/F2RL2/PROS1/PLAUR/PLAU/FGB/CEACAM1/SERPINA1/COMP/ITGA2/ANXA8/COL3A1/FAP/FN1/SERPINB2/SAA1	21
BP	GO:0031639	plasminogen activation	6/800	0.000514979	0.00695146	ANXA2/RUNX1/FGG/PLAU/FGB/S100A10	6
BP	GO:0001503	ossification	33/800	0.000551965	0.00738065	TGFB2/PTGS2/CTSK/ISG15/CLEC5A/TNFAIP6/BMPR1B/COL5A2/IBSP/OMD/CLEC3A/RUNX1/MMP16/FFAR4/ITGA11/RFLNA/TNFSF11/TNC/COMP/ASPN/COL1A2/CDH11/CCN4/CTHRC1/VCAN/GREM1/LOX/COL1A1/SFRP2/PTH/ALOX5/COL11A1/MMP13	33
BP	GO:0031295	T cell costimulation	8/800	0.000552375	0.00738065	CD274/ICOS/CCL19/DPP4/CARD11/CD80/PDCD1LG2/TNFSF4	8
BP	GO:0002544	chronic inflammatory response	5/800	0.000555982	0.00738065	CXCL13/S100A8/FOXP3/LTA/S100A9	5
BP	GO:0002830	positive regulation of type 2 immune response	5/800	0.000555982	0.00738065	IL18/RSAD2/CD74/NOD2/TNFSF4	5
BP	GO:0090713	immunological memory process	5/800	0.000555982	0.00738065	IL12B/IFNL1/HLA-DRA/HLA-DRB1/TNFSF4	5
BP	GO:2000425	regulation of apoptotic cell clearance	4/800	0.000556339	0.00738065	C3/CD300LF/C2/TGM2	4
BP	GO:0002793	positive regulation of peptide secretion	12/800	0.000570571	0.0075363	C1QTNF12/GPR68/FGG/FFAR4/HLA-DRB1/FGB/TNFSF11/S100A8/CFTR/VSNL1/ADCY8/GRP	12
BP	GO:1900046	regulation of hemostasis	10/800	0.000571326	0.0075363	PROC/HPSE/FGG/PROS1/PLAU/FGB/CEACAM1/COMP/FAP/SERPINB2	10
BP	GO:0001894	tissue homeostasis	24/800	0.000620844	0.00816621	ADAM8/PTGS2/CTSK/CCR2/MC4R/INAVA/CRACD/NOD2/PIGR/VSIG1/ITGB6/LYZ/OPRPN/TNFSF11/IL17A/JCHAIN/ABCA12/COMP/DCSTAMP/PROM1/COL3A1/RP1/PTH/CST4	24
BP	GO:0030282	bone mineralization	14/800	0.000634175	0.00831793	PTGS2/ISG15/BMPR1B/IBSP/OMD/RFLNA/COMP/ASPN/COL1A2/GREM1/LOX/PTH/ALOX5/MMP13	14
BP	GO:0035987	endodermal cell differentiation	8/800	0.000644077	0.00839145	LAMB3/ITGB2/COL5A2/COL12A1/COL5A1/INHBA/FN1/COL11A1	8
BP	GO:0045581	negative regulation of T cell differentiation	8/800	0.000644077	0.00839145	LAG3/CTLA4/IFNL1/CD74/IL2/RUNX1/TNFSF4/FOXP3	8
BP	GO:0002790	peptide secretion	21/800	0.000645217	0.00839145	C1QTNF12/GPR68/MC4R/EFNA5/ADRA2A/IFNG/CD74/FGG/FFAR4/HLA-DRB1/FGB/TNFSF11/ABCA12/S100A8/CFTR/VSNL1/ADCY8/IL1RN/GRP/PTPRN/ALOX5	21
BP	GO:0007218	neuropeptide signaling pathway	13/800	0.00067209	0.00871646	NPSR1/NTSR1/GPR84/PNOC/MCHR1/AGRP/NPY2R/PMCH/PDYN/NMU/GLRA3/SORCS3/GRP	13
BP	GO:0050817	coagulation	21/800	0.000683594	0.0088409	PROC/TFPI2/FBLN1/HPSE/ADRA2A/FGG/F2RL2/PROS1/PLAUR/PLAU/FGB/CEACAM1/SERPINA1/COMP/ITGA2/ANXA8/COL3A1/FAP/FN1/SERPINB2/SAA1	21
BP	GO:0002791	regulation of peptide secretion	18/800	0.000688461	0.00885831	C1QTNF12/GPR68/EFNA5/ADRA2A/IFNG/CD74/FGG/FFAR4/HLA-DRB1/FGB/TNFSF11/ABCA12/S100A8/CFTR/VSNL1/ADCY8/GRP/ALOX5	18
BP	GO:1903532	positive regulation of secretion by cell	24/800	0.000688767	0.00885831	TGFB2/ADAM8/C1QTNF12/ITGAM/GPR68/ITGB2/NTSR1/IFNG/FGG/FFAR4/HLA-DRB1/FGB/TNFSF11/PTGES/CFTR/INHBA/VSNL1/ADCY8/KCNN4/GRP/SYT1/RETN/RAB27B/CD177	24
BP	GO:0050673	epithelial cell proliferation	34/800	0.000693891	0.00889948	TGFB2/SCG2/LGR5/IL12B/COL8A2/FST/FGF10/PGR/FUT2/TACSTD2/CCL24/WNT16/CDKN2B/JAML/SLURP1/SERPINB5/NOD2/MMP12/IL26/CEACAM1/TNFSF11/KLK8/XDH/EHF/FAP/WNT2/CCL11/SFRP2/SDR16C5/SFN/PTPRN/EREG/ALOX5/WNT7A	34
BP	GO:0010817	regulation of hormone levels	37/800	0.000699541	0.00894717	C1QTNF12/CTSK/OSM/GPR68/DPP4/MC4R/EFNA5/ADRA2A/SLCO4A1/FOXA1/ALDH1A3/IFNG/ADH4/FGG/FFAR4/IL11/HLA-DRB1/FGB/TNFSF11/CGA/ABCA12/CCKAR/CFTR/CORIN/INHBA/CYP2S1/VSNL1/ADCY8/IL1RN/DHRS9/IL4I1/GRP/SDR16C5/CYP26A1/PTPRN/ALOX5/RETN	37
BP	GO:0032722	positive regulation of chemokine production	10/800	0.000722227	0.00920825	IL18/IFNG/CD74/NOD2/TNFSF4/IL17A/IL1RL1/ALOX15B/LBP/AZU1	10
BP	GO:0007599	hemostasis	21/800	0.000723932	0.00920825	PROC/TFPI2/FBLN1/HPSE/ADRA2A/FGG/F2RL2/PROS1/PLAUR/PLAU/FGB/CEACAM1/SERPINA1/COMP/ITGA2/ANXA8/COL3A1/FAP/FN1/SERPINB2/SAA1	21
BP	GO:0007586	digestion	15/800	0.000740381	0.00938136	NPC1L1/NPSR1/FGF10/ADRA2A/PRSS3/INAVA/CRACD/TIFAB/NOD2/VSIG1/UCN2/IL17A/LDLR/KCNN4/CAPN8	15
BP	GO:0002923	regulation of humoral immune response mediated by circulating immunoglobulin	5/800	0.000743025	0.00938136	FCGR2B/CR1L/NOD2/CD55/LTA	5
BP	GO:0001774	microglial cell activation	8/800	0.000747672	0.00938136	CST7/ITGAM/ITGB2/CTSC/IFNG/LDLR/FPR2/AZU1	8
BP	GO:0031294	lymphocyte costimulation	8/800	0.000747672	0.00938136	CD274/ICOS/CCL19/DPP4/CARD11/CD80/PDCD1LG2/TNFSF4	8
BP	GO:0043616	keratinocyte proliferation	8/800	0.000747672	0.00938136	FST/FGF10/WNT16/SLURP1/KLK8/SDR16C5/SFN/EREG	8
BP	GO:0002700	regulation of production of molecular mediator of immune response	17/800	0.000784751	0.00981999	FCGR2B/TGFB2/IL18/CCR2/RSAD2/KLK7/INAVA/CD74/IL2/NOD2/TNFSF4/CD55/IL17A/CLC/FOXP3/MZB1/HLA-G	17
BP	GO:0034505	tooth mineralization	6/800	0.000800466	0.00996278	ITGB6/ASPN/CFTR/AMTN/COL1A1/MMP20	6
BP	GO:0035774	positive regulation of insulin secretion involved in cellular response to glucose stimulus	6/800	0.000800466	0.00996278	C1QTNF12/GPR68/HLA-DRB1/CFTR/VSNL1/ADCY8	6
BP	GO:0002886	regulation of myeloid leukocyte mediated immunity	9/800	0.000813464	0.0100704	FCGR2B/SPI1/ITGAM/RAC2/CCR2/ITGB2/C3/CXCL6/CD177	9
BP	GO:0050891	multicellular organismal water homeostasis	9/800	0.000813464	0.0100704	MET/SCNN1A/AQP3/GRHL3/ABCA12/KRT16/CFTR/TMPRSS11F/SFN	9
BP	GO:0046640	regulation of alpha-beta T cell proliferation	7/800	0.000828757	0.0102324	IL12B/CD274/IL18/CCR2/TNFSF4/CD55/EBI3	7
BP	GO:0090087	regulation of peptide transport	18/800	0.000835829	0.0102404	C1QTNF12/GPR68/EFNA5/ADRA2A/IFNG/CD74/FGG/FFAR4/HLA-DRB1/FGB/TNFSF11/ABCA12/S100A8/CFTR/VSNL1/ADCY8/GRP/ALOX5	18
BP	GO:0032642	regulation of chemokine production	12/800	0.000836505	0.0102404	IL18/IFNG/CXCL6/CD74/NOD2/TNFSF4/IL17A/IL1RL1/ALOX15B/LBP/ELANE/AZU1	12
BP	GO:0002604	regulation of dendritic cell antigen processing and presentation	4/800	0.000844884	0.0102404	FCGR2B/CCL19/CD74/NOD2	4
BP	GO:0046598	positive regulation of viral entry into host cell	4/800	0.000844884	0.0102404	TMPRSS2/CD74/HLA-DRB1/TMPRSS4	4
BP	GO:0070944	neutrophil-mediated killing of bacterium	4/800	0.000844884	0.0102404	CXCL6/TREM1/ELANE/AZU1	4
BP	GO:0075294	positive regulation by symbiont of entry into host	4/800	0.000844884	0.0102404	TMPRSS2/CD74/HLA-DRB1/TMPRSS4	4
BP	GO:0097278	complement-dependent cytotoxicity	4/800	0.000844884	0.0102404	CR1L/C3/CFH/CD55	4
BP	GO:0030195	negative regulation of blood coagulation	8/800	0.000864254	0.0104478	PROC/FGG/PROS1/PLAU/FGB/CEACAM1/FAP/SERPINB2	8
BP	GO:0042267	natural killer cell mediated cytotoxicity	10/800	0.00090452	0.0109022	GZMB/IL12B/IL18/NCR3/HLA-B/SERPINB4/LAG3/SLAMF7/CEACAM1/HLA-G	10
BP	GO:0046883	regulation of hormone secretion	21/800	0.000906558	0.0109022	C1QTNF12/OSM/GPR68/EFNA5/ADRA2A/IFNG/FGG/FFAR4/IL11/HLA-DRB1/FGB/TNFSF11/ABCA12/CCKAR/CFTR/INHBA/VSNL1/ADCY8/GRP/ALOX5/RETN	21
BP	GO:0002718	regulation of cytokine production involved in immune response	12/800	0.000917116	0.0110006	TGFB2/IL18/CCR2/RSAD2/INAVA/CD74/NOD2/TNFSF4/CD55/CLC/FOXP3/HLA-G	12
BP	GO:0048608	reproductive structure development	33/800	0.000930575	0.0111332	TGFB2/NTRK1/STRA6/PTGS2/TFAP2C/FST/CDX2/MME/FGF10/PGR/C3/TNFAIP6/BMPR1B/FOXA1/TIFAB/SPRR2A/SERPINB5/LHX1/TEX11/INSL3/TNC/INHBA/CSF2/RXFP2/ALOX15B/KRT19/WNT2/WT1/SFRP2/PTPRN/EREG/RETN/WNT7A	33
BP	GO:0007565	female pregnancy	18/800	0.000948418	0.0113175	PTGS2/FBLN1/ITGA3/PGR/ITGB4/ADRA2A/PNOC/AGRP/PSG7/CORIN/ITGA2/PSG1/PSG4/PSG5/PSG9/PSG3/PSG6/EPYC	18
BP	GO:0002283	neutrophil activation involved in immune response	5/800	0.000973331	0.0114764	SPI1/ITGAM/ITGB2/ANXA3/CD177	5
BP	GO:0002888	positive regulation of myeloid leukocyte mediated immunity	5/800	0.000973331	0.0114764	SPI1/ITGAM/ITGB2/C3/CD177	5
BP	GO:0010744	positive regulation of macrophage derived foam cell differentiation	5/800	0.000973331	0.0114764	IL18/APOB/PLA2G2A/CSF2/ALOX15B	5
BP	GO:0032930	positive regulation of superoxide anion generation	5/800	0.000973331	0.0114764	ITGAM/ITGB2/CRP/FPR2/CD177	5
BP	GO:0002369	T cell cytokine production	7/800	0.000979091	0.0114764	IL18/CCR2/RSAD2/TNFSF4/CD55/CLC/FOXP3	7
BP	GO:0002385	mucosal immune response	7/800	0.000979091	0.0114764	DEFB1/NOD2/IFNL2/PIGR/RNASE3/RNASE2/BPIFB1	7
BP	GO:0002724	regulation of T cell cytokine production	7/800	0.000979091	0.0114764	IL18/CCR2/RSAD2/TNFSF4/CD55/CLC/FOXP3	7
BP	GO:0022602	ovulation cycle process	8/800	0.000994977	0.0116039	TGFB2/PGR/TNFAIP6/BMPR1B/INHBA/PTPRN/EREG/RETN	8
BP	GO:0043300	regulation of leukocyte degranulation	8/800	0.000994977	0.0116039	FCGR2B/SPI1/ITGAM/RAC2/CCR2/ITGB2/CEACAM1/CD177	8
BP	GO:0045639	positive regulation of myeloid cell differentiation	12/800	0.00100409	0.0116808	IL12B/GPR68/ISG15/IFNG/CD74/RUNX1/HLA-DRB1/TNFSF11/IL17A/DCSTAMP/INHBA/OCSTAMP	12
BP	GO:0015833	peptide transport	22/800	0.00100945	0.0117136	CDH17/C1QTNF12/GPR68/MC4R/EFNA5/ADRA2A/IFNG/CD74/FGG/FFAR4/HLA-DRB1/FGB/TNFSF11/ABCA12/S100A8/CFTR/VSNL1/ADCY8/IL1RN/GRP/PTPRN/ALOX5	22
BP	GO:0034103	regulation of tissue remodeling	11/800	0.00102957	0.0119172	ADAM8/IL12B/IL18/MC4R/IL2/RUNX1/CEACAM1/TNFSF11/DCSTAMP/GPNMB/GREM1	11
BP	GO:0061458	reproductive system development	33/800	0.00104499	0.0120656	TGFB2/NTRK1/STRA6/PTGS2/TFAP2C/FST/CDX2/MME/FGF10/PGR/C3/TNFAIP6/BMPR1B/FOXA1/TIFAB/SPRR2A/SERPINB5/LHX1/TEX11/INSL3/TNC/INHBA/CSF2/RXFP2/ALOX15B/KRT19/WNT2/WT1/SFRP2/PTPRN/EREG/RETN/WNT7A	33
BP	GO:0051047	positive regulation of secretion	25/800	0.00110209	0.0126932	TGFB2/ADAM8/C1QTNF12/ITGAM/GPR68/ITGB2/NTSR1/IFNG/FGG/FFAR4/HLA-DRB1/FGB/TNFSF11/PTGES/S100A8/CFTR/INHBA/VSNL1/ADCY8/KCNN4/GRP/SYT1/RETN/RAB27B/CD177	25
BP	GO:0007160	cell-matrix adhesion	21/800	0.00112756	0.0129543	ITGAM/ITGA3/ITGB2/HPSE/ITGB4/EFNA5/ITGBL1/FGG/ITGA11/MMP12/L1CAM/ITGB6/PLAU/FGB/S100A10/ITGA2/COL3A1/GREM1/CDKN2A/FN1/CEACAM6	21
BP	GO:0050829	defense response to Gram-negative bacterium	11/800	0.00113423	0.0129987	IL12B/DEFB1/CXCL6/TREM1/RNASE3/LYZ/IL17A/LBP/ELANE/AZU1/NLRP10	11
BP	GO:0002269	leukocyte activation involved in inflammatory response	8/800	0.00114104	0.0130124	CST7/ITGAM/ITGB2/CTSC/IFNG/LDLR/FPR2/AZU1	8
BP	GO:1902041	regulation of extrinsic apoptotic signaling pathway via death domain receptors	8/800	0.00114104	0.0130124	LGALS3/BMPR1B/ICAM1/FGG/FGB/SCRT2/PMAIP1/SFRP2	8
BP	GO:0071634	regulation of transforming growth factor beta production	7/800	0.00115007	0.013051	TGFB2/PTGS2/ITGB6/FOXP3/SERPINB7/LUM/FN1	7
BP	GO:0097242	amyloid-beta clearance	7/800	0.00115007	0.013051	ITGAM/ITGB2/MME/C3/IFNG/LDLR/MARCO	7
BP	GO:0002712	regulation of B cell mediated immunity	9/800	0.00117256	0.0131476	FCGR2B/CR1L/C3/IL2/NOD2/TNFSF4/CD55/FOXP3/LTA	9
BP	GO:0002889	regulation of immunoglobulin mediated immune response	9/800	0.00117256	0.0131476	FCGR2B/CR1L/C3/IL2/NOD2/TNFSF4/CD55/FOXP3/LTA	9
BP	GO:0032731	positive regulation of interleukin-1 beta production	9/800	0.00117256	0.0131476	PYDC1/GBP5/CCL19/MNDA/IFNG/INAVA/NOD2/IL17A/AZU1	9
BP	GO:0043030	regulation of macrophage activation	9/800	0.00117256	0.0131476	FCGR2B/CST7/SPACA3/IL31RA/CTSC/CD74/LDLR/IL1RL1/LBP	9
BP	GO:0017157	regulation of exocytosis	19/800	0.00117277	0.0131476	FCGR2B/SPI1/SYT8/ITGAM/RAC2/CCR2/ITGB2/ADRA2A/IFNG/FGG/HTR2A/FGB/CEACAM1/CFTR/VSNL1/SYT1/WNT7A/RAB27B/CD177	19
BP	GO:0033561	regulation of water loss via skin	6/800	0.00119473	0.0133614	MET/GRHL3/ABCA12/KRT16/TMPRSS11F/SFN	6
BP	GO:0070167	regulation of biomineral tissue development	12/800	0.00119869	0.0133733	ISG15/BMPR1B/OMD/RFLNA/COMP/ASPN/CFTR/GREM1/AMTN/PTH/MMP20/ALOX5	12
BP	GO:0060249	anatomical structure homeostasis	26/800	0.00122063	0.0135345	ADAM8/PTGS2/CTSK/CCR2/CALB2/MC4R/INAVA/CRACD/NOD2/PIGR/VSIG1/ITGB6/LYZ/OPRPN/TNFSF11/IL17A/JCHAIN/ABCA12/COMP/DCSTAMP/PROM1/COL3A1/RP1/LOX/PTH/CST4	26
BP	GO:0051798	positive regulation of hair follicle development	4/800	0.00122483	0.0135345	TGFB2/FST/HPSE/KRT17	4
BP	GO:0070170	regulation of tooth mineralization	4/800	0.00122483	0.0135345	ASPN/CFTR/AMTN/MMP20	4
BP	GO:0070943	neutrophil-mediated killing of symbiont cell	4/800	0.00122483	0.0135345	CXCL6/TREM1/ELANE/AZU1	4
BP	GO:0002228	natural killer cell mediated immunity	10/800	0.00124729	0.0137418	GZMB/IL12B/IL18/NCR3/HLA-B/SERPINB4/LAG3/SLAMF7/CEACAM1/HLA-G	10
BP	GO:0002837	regulation of immune response to tumor cell	5/800	0.0012527	0.0137418	IL12B/CD274/HLA-DRB1/CEACAM1/IL4I1	5
BP	GO:0090026	positive regulation of monocyte chemotaxis	5/800	0.0012527	0.0137418	CCR2/CXCL10/FPR2/CCL1/CXCL17	5
BP	GO:0097191	extrinsic apoptotic signaling pathway	20/800	0.00125546	0.0137418	TGFB2/SPI1/SCG2/LGALS3/BCL2A1/FGF10/BMPR1B/ICAM1/ERBB3/IFNG/IL2/FGG/FGB/SCRT2/PMAIP1/INHBA/CSF2/TERT/CD70/SFRP2	20
BP	GO:0042886	amide transport	24/800	0.00130911	0.0142953	CDH17/C1QTNF12/GPR68/MC4R/EFNA5/ADRA2A/IFNG/AQP3/CD74/FGG/FFAR4/HLA-DRB1/FGB/TNFSF11/ABCA12/S100A8/CFTR/AQP9/VSNL1/ADCY8/IL1RN/GRP/PTPRN/ALOX5	24
BP	GO:2000401	regulation of lymphocyte migration	9/800	0.00131731	0.0143509	ADAM8/XCL2/CCR2/CCR6/SPN/CXCL13/CXCL10/CCL7/CCL20	9
BP	GO:0046633	alpha-beta T cell proliferation	7/800	0.00134359	0.0146028	IL12B/CD274/IL18/CCR2/TNFSF4/CD55/EBI3	7
BP	GO:0110149	regulation of biomineralization	12/800	0.00142354	0.015414	ISG15/BMPR1B/OMD/RFLNA/COMP/ASPN/CFTR/GREM1/AMTN/PTH/MMP20/ALOX5	12
BP	GO:0002761	regulation of myeloid leukocyte differentiation	13/800	0.00142488	0.015414	IL12B/GPR68/TNFAIP6/IFNG/CD74/RUNX1/HLA-DRB1/CEACAM1/TNFSF11/IL17A/DCSTAMP/INHBA/OCSTAMP	13
BP	GO:0031069	hair follicle morphogenesis	6/800	0.00144033	0.0154649	TGFB2/WNT10A/FST/FGF10/FOXQ1/KRT17	6
BP	GO:0051873	killing by host of symbiont cells	6/800	0.00144033	0.0154649	CFHR1/CXCL6/TREM1/KRT6A/ELANE/AZU1	6
BP	GO:0061037	negative regulation of cartilage development	6/800	0.00144033	0.0154649	CTSK/RFLNA/CCN4/GREM1/NKX3-2/PTH	6
BP	GO:0006887	exocytosis	28/800	0.00144295	0.0154649	FCGR2B/SPI1/SYT8/MILR1/ITGAM/RAC2/CCR2/ITGB2/ANXA3/HCK/ADRA2A/MRGPRX2/IFNG/FGG/HTR2A/SYNGR3/PRSS12/FGB/CEACAM1/ABCA12/NKD2/MYO1G/CFTR/VSNL1/SYT1/WNT7A/RAB27B/CD177	28
BP	GO:0050890	cognition	25/800	0.00145278	0.0155344	NTRK1/STRA6/PTGS2/HRH1/GRM5/PTPRZ1/ITGA3/MME/NTSR1/TH/MGAT3/TIFAB/HTR2A/HLA-DRA/JPH3/LDLR/DRD5/SLC24A2/KLK8/ADCY8/SORCS3/S100B/CCL11/LRRN4/TMPRSS11E	25
BP	GO:0009615	response to virus	30/800	0.00145944	0.0155696	IL12B/OASL/CCL19/RSAD2/TRIM15/ISG15/APOBEC3A/IFIT2/APOB/PIM2/IFNG/CXCL9/BATF3/ZBP1/IFNL1/CXCL10/IFNL2/MMP12/ITGB6/DCLK1/TNFSF4/BIRC3/RNASE2/PMAIP1/FOXP3/IFNL3/CD207/CCL22/AZU1/CCL11	30
BP	GO:0050819	negative regulation of coagulation	8/800	0.0014843	0.0157984	PROC/FGG/PROS1/PLAU/FGB/CEACAM1/FAP/SERPINB2	8
BP	GO:0022600	digestive system process	12/800	0.00154838	0.0164426	NPC1L1/NPSR1/FGF10/ADRA2A/INAVA/CRACD/TIFAB/NOD2/VSIG1/IL17A/LDLR/KCNN4	12
BP	GO:0002251	organ or tissue specific immune response	7/800	0.00156164	0.0165077	DEFB1/NOD2/IFNL2/PIGR/RNASE3/RNASE2/BPIFB1	7
BP	GO:0032733	positive regulation of interleukin-10 production	7/800	0.00156164	0.0165077	IL12B/CD274/ISG15/TIGIT/INAVA/NOD2/TNFSF4	7
BP	GO:0071692	protein localization to extracellular region	28/800	0.00156714	0.0165282	TGFB2/ADAM8/SCG2/IL12B/C1QTNF12/GPR68/RSAD2/CBLN4/MC4R/EFNA5/ADRA2A/IFNG/CBLN1/FGG/HLA-DRB1/FGB/NBL1/ABCA12/SNCG/COMP/CFTR/VSNL1/ADCY8/IL1RN/KCNN4/PTPRN/SAA1/ALOX5	28
BP	GO:0031290	retinal ganglion cell axon guidance	5/800	0.00158713	0.0166631	PTPRO/BMPR1B/EFNA5/EPHB3/ISL2	5
BP	GO:1903902	positive regulation of viral life cycle	5/800	0.00158713	0.0166631	TMPRSS2/CLEC4G/CD74/HLA-DRB1/TMPRSS4	5
BP	GO:0048525	negative regulation of viral process	11/800	0.0016443	0.0171853	TRIM10/OASL/RSAD2/TRIM15/ISG15/APOBEC3A/CIITA/CH25H/IFNL3/FCN1/SLPI	11
BP	GO:0090277	positive regulation of peptide hormone secretion	11/800	0.0016443	0.0171853	C1QTNF12/GPR68/FGG/FFAR4/HLA-DRB1/FGB/TNFSF11/CFTR/VSNL1/ADCY8/GRP	11
BP	GO:0007492	endoderm development	10/800	0.00168917	0.0176146	LAMB3/DUSP5/ITGB2/COL5A2/COL12A1/LHX1/COL5A1/INHBA/FN1/COL11A1	10
BP	GO:0051216	cartilage development	18/800	0.00172565	0.0179545	MATN3/CTSK/BMPR1B/RUNX1/RFLNA/COMP/CCN4/COL3A1/GREM1/CHI3L1/COL1A1/NKX3-2/SFRP2/PTH/WNT7A/COL11A1/MMP13/EPYC	18
BP	GO:0030193	regulation of blood coagulation	9/800	0.00183982	0.0190994	PROC/HPSE/FGG/PROS1/PLAU/FGB/CEACAM1/FAP/SERPINB2	9
BP	GO:0061900	glial cell activation	8/800	0.00190471	0.0197289	CST7/ITGAM/ITGB2/CTSC/IFNG/LDLR/FPR2/AZU1	8
BP	GO:0002275	myeloid cell activation involved in immune response	11/800	0.00196203	0.0201763	SPI1/MILR1/ITGAM/RAC2/CCR2/ITGB2/ANXA3/MRGPRX2/IFNG/LBP/CD177	11
BP	GO:0034109	homotypic cell-cell adhesion	11/800	0.00196203	0.0201763	PTPRU/MEGF10/XG/FGG/PLAUR/FGB/CEACAM1/TNFSF11/DSC2/COMP/FN1	11
BP	GO:1903557	positive regulation of tumor necrosis factor superfamily cytokine production	12/800	0.00197809	0.0201763	CYBB/ADAM8/IL12B/CCR2/CCL19/CD2/SPN/IFNG/NOD2/IL17A/LBP/AZU1	12
BP	GO:0002834	regulation of response to tumor cell	5/800	0.00198276	0.0201763	IL12B/CD274/HLA-DRB1/CEACAM1/IL4I1	5
BP	GO:0030277	maintenance of gastrointestinal epithelium	5/800	0.00198276	0.0201763	INAVA/CRACD/NOD2/VSIG1/IL17A	5
BP	GO:0032700	negative regulation of interleukin-17 production	5/800	0.00198276	0.0201763	IL12B/IFNG/TNFSF4/FOXP3/IL36RN	5
BP	GO:0032928	regulation of superoxide anion generation	5/800	0.00198276	0.0201763	ITGAM/ITGB2/CRP/FPR2/CD177	5
BP	GO:0045624	positive regulation of T-helper cell differentiation	5/800	0.00198276	0.0201763	IL12B/IL18/CCL19/CD80/TNFSF4	5
BP	GO:0016032	viral process	31/800	0.00200764	0.0203846	TRIM10/TMPRSS2/OASL/CLEC4G/RSAD2/TRIM15/ISG15/CLEC5A/APOBEC3A/CIITA/ICAM1/CRP/CD74/CD80/HTR2A/MRC1/ITGB6/ANPEP/HLA-DRB1/CD55/NECTIN4/LDLR/CH25H/CXCL8/IFNL3/ITGA2/FCN1/TMPRSS4/CCL1/SLPI/LRRC15	31
BP	GO:0010743	regulation of macrophage derived foam cell differentiation	6/800	0.00204488	0.0207172	IL18/APOB/CRP/PLA2G2A/CSF2/ALOX15B	6
BP	GO:0051604	protein maturation	25/800	0.00206671	0.0208778	TMPRSS2/ADAM8/CST7/C1R/DPP4/ANXA2/MME/PRSS3/PERP/NLRP7/RUNX1/MMP16/FGG/PRSS12/PLAU/FGB/PCSK9/CTSE/COMP/NKD2/CORIN/S100A10/TMPRSS4/KLK1/SPON1	25
BP	GO:0042554	superoxide anion generation	7/800	0.0020796	0.0208778	CYBB/ITGAM/ITGB2/NCF2/CRP/FPR2/CD177	7
BP	GO:0051048	negative regulation of secretion	16/800	0.00208326	0.0208778	FCGR2B/SPI1/IL12B/OSM/CCR2/RSAD2/NPSR1/ADRA2A/ERBB3/TIFAB/CD74/FFAR4/IL11/CEACAM1/INHBA/VSNL1	16
BP	GO:0007613	memory	13/800	0.00208328	0.0208778	PTGS2/HRH1/ITGA3/TH/HTR2A/JPH3/LDLR/SLC24A2/KLK8/ADCY8/SORCS3/S100B/LRRN4	13
BP	GO:0046887	positive regulation of hormone secretion	13/800	0.00208328	0.0208778	C1QTNF12/GPR68/FGG/FFAR4/HLA-DRB1/FGB/TNFSF11/CFTR/INHBA/VSNL1/ADCY8/GRP/RETN	13
BP	GO:0007611	learning or memory	22/800	0.00213026	0.0213026	NTRK1/STRA6/PTGS2/HRH1/GRM5/PTPRZ1/ITGA3/MME/NTSR1/TH/TIFAB/HTR2A/JPH3/LDLR/DRD5/SLC24A2/KLK8/ADCY8/SORCS3/S100B/CCL11/LRRN4	22
BP	GO:0009306	protein secretion	27/800	0.00219961	0.0219487	TGFB2/ADAM8/SCG2/IL12B/C1QTNF12/GPR68/RSAD2/CBLN4/MC4R/EFNA5/ADRA2A/IFNG/CBLN1/FGG/HLA-DRB1/FGB/ABCA12/SNCG/COMP/CFTR/VSNL1/ADCY8/IL1RN/KCNN4/PTPRN/SAA1/ALOX5	27
BP	GO:0007156	homophilic cell adhesion via plasma membrane adhesion molecules	16/800	0.0022142	0.0220467	CDH17/CDH20/PCDHAC1/DCHS2/PCDH9/PCDHAC2/VSTM2L/L1CAM/CEACAM1/NECTIN4/CDH6/DSC2/FAT3/CDH11/DSC3/CEACAM6	16
BP	GO:0097696	receptor signaling pathway via STAT	17/800	0.00226517	0.0225058	IL12B/OSM/IL18/CCR2/CRLF1/IL31RA/IFNG/IFNL1/IL2/IFNL2/IL26/CRLF2/TNFRSF18/IFNL3/CSF2/TNFSF18/IL22RA2	17
BP	GO:0035592	establishment of protein localization to extracellular region	27/800	0.00228957	0.0226977	TGFB2/ADAM8/SCG2/IL12B/C1QTNF12/GPR68/RSAD2/CBLN4/MC4R/EFNA5/ADRA2A/IFNG/CBLN1/FGG/HLA-DRB1/FGB/ABCA12/SNCG/COMP/CFTR/VSNL1/ADCY8/IL1RN/KCNN4/PTPRN/SAA1/ALOX5	27
BP	GO:0043301	negative regulation of leukocyte degranulation	4/800	0.0023139	0.0226977	FCGR2B/SPI1/CCR2/CEACAM1	4
BP	GO:0050930	induction of positive chemotaxis	4/800	0.0023139	0.0226977	SCG2/FGF10/CXCL8/AZU1	4
BP	GO:0050966	detection of mechanical stimulus involved in sensory perception of pain	4/800	0.0023139	0.0226977	NTRK1/SCN1A/HTR2A/ITGA2	4
BP	GO:0060732	positive regulation of inositol phosphate biosynthetic process	4/800	0.0023139	0.0226977	HRH1/NTSR1/P2RY6/PTH	4
BP	GO:0070942	neutrophil mediated cytotoxicity	4/800	0.0023139	0.0226977	CXCL6/TREM1/ELANE/AZU1	4
BP	GO:0090596	sensory organ morphogenesis	22/800	0.00233938	0.0228992	LHFPL5/STRA6/COL8A2/FGF10/TH/WNT16/COL5A2/ALDH1A3/TIFAB/LHX1/GBX2/GRHL3/PITX2/COL5A1/MFAP5/PROM1/CTHRC1/WNT2/RP1/PITX3/NKX3-2/COL11A1	22
BP	GO:0048286	lung alveolus development	7/800	0.00238383	0.0232851	STRA6/FGF10/PGR/FOXA1/MMP12/ITGB6/ABCA12	7
BP	GO:0046660	female sex differentiation	13/800	0.00240865	0.0233504	STRA6/FST/FGF10/PGR/TNFAIP6/BMPR1B/SPRR2A/LHX1/INHBA/WT1/PTPRN/EREG/RETN	13
BP	GO:0036336	dendritic cell migration	6/800	0.00241069	0.0233504	SPI1/SLAMF8/CCR2/CCR6/CCL19/ALOX5	6
BP	GO:0048333	mesodermal cell differentiation	6/800	0.00241069	0.0233504	TRIM15/ITGA3/ITGB4/INHBA/ITGA2/SFRP2	6
BP	GO:0050974	detection of mechanical stimulus involved in sensory perception	6/800	0.00241069	0.0233504	LHFPL5/NTRK1/SCN1A/HTR2A/ITGA2/COL11A1	6
BP	GO:0002689	negative regulation of leukocyte chemotaxis	5/800	0.00244584	0.0234943	SLAMF8/DPP4/TNFAIP6/NBL1/GREM1	5
BP	GO:0030728	ovulation	5/800	0.00244584	0.0234943	PTGS2/PGR/TNFAIP6/INHBA/EREG	5
BP	GO:0032331	negative regulation of chondrocyte differentiation	5/800	0.00244584	0.0234943	RFLNA/CCN4/GREM1/NKX3-2/PTH	5
BP	GO:0032693	negative regulation of interleukin-10 production	5/800	0.00244584	0.0234943	FCGR2B/IL12B/CD274/PDCD1LG2/FOXP3	5
BP	GO:0042310	vasoconstriction	10/800	0.00246702	0.0236486	PTGS2/HRH1/ADRA2A/CRP/FGG/HTR2A/FGB/HTR1D/DRD5/COMP	10
BP	GO:0002062	chondrocyte differentiation	12/800	0.00250092	0.0238256	BMPR1B/RUNX1/RFLNA/COMP/CCN4/COL3A1/GREM1/NKX3-2/SFRP2/PTH/WNT7A/COL11A1	12
BP	GO:0032611	interleukin-1 beta production	12/800	0.00250092	0.0238256	PYDC1/GBP5/CCL19/MNDA/IFNG/INAVA/NLRP7/CARD17/NOD2/FFAR4/IL17A/AZU1	12
BP	GO:0032651	regulation of interleukin-1 beta production	12/800	0.00250092	0.0238256	PYDC1/GBP5/CCL19/MNDA/IFNG/INAVA/NLRP7/CARD17/NOD2/FFAR4/IL17A/AZU1	12
BP	GO:0050922	negative regulation of chemotaxis	9/800	0.00251611	0.0239211	SLAMF8/PTPRO/DPP4/TNFAIP6/CXCL13/NBL1/SEMA3C/GREM1/ELANE	9
BP	GO:0002377	immunoglobulin production	19/800	0.00252193	0.0239273	FCGR2B/CCR6/HLA-DMA/IL2/HLA-DOB/HLA-DPB1/HLA-DRA/HLA-DQA1/HLA-DRB1/TNFSF4/HLA-DQB1/BATF/HLA-DPA1/FOXP3/HLA-DRB5/HLA-DOA/HLA-DQA2/HLA-DQB2/MZB1	19
BP	GO:0030316	osteoclast differentiation	11/800	0.00253066	0.023961	IL12B/GPR68/ANXA2/TNFAIP6/IFNG/OSCAR/TNFSF11/IL17A/DCSTAMP/OCSTAMP/CCN4	11
BP	GO:0007189	adenylate cyclase-activating G protein-coupled receptor signaling pathway	15/800	0.00256874	0.024272	LGR5/MC4R/ADRA2A/CXCL9/CXCL10/UCN2/LPAR3/ADGRE3/DRD5/GPR12/CXCL11/RXFP2/ADCY8/ADRB3/PTH	15
BP	GO:0014066	regulation of phosphatidylinositol 3-kinase signaling	12/800	0.00269832	0.0254137	TGFB2/NTRK1/DCN/OSM/IL18/HCST/WNT16/ERBB3/ROR1/CEACAM1/SERPINA12/FN1	12
BP	GO:0045921	positive regulation of exocytosis	10/800	0.00270055	0.0254137	ITGAM/ITGB2/IFNG/FGG/FGB/CFTR/VSNL1/SYT1/RAB27B/CD177	10
BP	GO:0002861	regulation of inflammatory response to antigenic stimulus	7/800	0.00272121	0.0255562	FCGR2B/IL12B/C3/HCK/NOD2/HLA-DRB1/LTA	7
BP	GO:0030072	peptide hormone secretion	19/800	0.00279342	0.0261812	C1QTNF12/GPR68/MC4R/EFNA5/ADRA2A/IFNG/FGG/FFAR4/HLA-DRB1/FGB/TNFSF11/ABCA12/CFTR/VSNL1/ADCY8/IL1RN/GRP/PTPRN/ALOX5	19
BP	GO:0048730	epidermis morphogenesis	6/800	0.0028236	0.0264106	TGFB2/WNT10A/FST/FGF10/FOXQ1/KRT17	6
BP	GO:0007259	receptor signaling pathway via JAK-STAT	16/800	0.00297612	0.0276805	IL12B/OSM/IL18/CCR2/CRLF1/IL31RA/IFNG/IFNL1/IL2/IFNL2/IL26/TNFRSF18/IFNL3/CSF2/TNFSF18/IL22RA2	16
BP	GO:0016048	detection of temperature stimulus	5/800	0.00298268	0.0276805	NTRK1/NTSR1/HTR2A/TRPM8/DRGX	5
BP	GO:0090023	positive regulation of neutrophil chemotaxis	5/800	0.00298268	0.0276805	RAC2/CCL19/CD74/CXCL8/LBP	5
BP	GO:0044703	multi-organism reproductive process	18/800	0.00298327	0.0276805	PTGS2/FBLN1/ITGA3/PGR/ITGB4/ADRA2A/PNOC/AGRP/PSG7/CORIN/ITGA2/PSG1/PSG4/PSG5/PSG9/PSG3/PSG6/EPYC	18
BP	GO:0032725	positive regulation of granulocyte macrophage colony-stimulating factor production	4/800	0.00304998	0.0281303	IL12B/IL18/CD80/PAEP	4
BP	GO:0045346	regulation of MHC class II biosynthetic process	4/800	0.00304998	0.0281303	SPI1/CIITA/IFNG/AZU1	4
BP	GO:0072378	blood coagulation, fibrin clot formation	4/800	0.00304998	0.0281303	FBLN1/FGG/FGB/FN1	4
BP	GO:0050818	regulation of coagulation	9/800	0.00306698	0.0282309	PROC/HPSE/FGG/PROS1/PLAU/FGB/CEACAM1/FAP/SERPINB2	9
BP	GO:0007409	axonogenesis	31/800	0.0030826	0.0283184	NTRK1/NPTX1/PTPRO/PTPRZ1/RAC2/LAMC2/EPHA10/BMPR1B/EFNA5/CNTN1/DCC/EPHB3/VSTM2L/L1CAM/LHX1/GBX2/GAP43/DCLK1/ISL2/LPAR3/S100A6/TRIM46/SEMA3C/CCKAR/TUBB3/DRGX/CDH11/ACTBL2/S100B/FN1/WNT7A	31
BP	GO:0042269	regulation of natural killer cell mediated cytotoxicity	7/800	0.00309402	0.028367	IL12B/NCR3/HLA-B/SERPINB4/LAG3/CEACAM1/HLA-G	7
BP	GO:0007369	gastrulation	17/800	0.0031667	0.0289759	LAMB3/TRIM15/DUSP5/ITGA3/AMOT/ITGB2/ITGB4/COL5A2/COL12A1/LHX1/COL5A1/INHBA/ITGA2/IL1RN/SFRP2/FN1/COL11A1	17
BP	GO:0050869	negative regulation of B cell activation	6/800	0.00328721	0.0300193	FCGR2B/TNFRSF13B/MNDA/CTLA4/FOXP3/INHBA	6
BP	GO:0042303	molting cycle	12/800	0.00336765	0.0306062	TGFB2/PTGS2/LGR5/WNT10A/FST/FGF10/HPSE/FOXQ1/KRT16/INHBA/KRT17/TERT	12
BP	GO:0042633	hair cycle	12/800	0.00336765	0.0306062	TGFB2/PTGS2/LGR5/WNT10A/FST/FGF10/HPSE/FOXQ1/KRT16/INHBA/KRT17/TERT	12
BP	GO:0014065	phosphatidylinositol 3-kinase signaling	14/800	0.00337131	0.0306062	TGFB2/NTRK1/NYAP2/DCN/OSM/IL18/HCST/WNT16/ERBB3/HTR2A/ROR1/CEACAM1/SERPINA12/FN1	14
BP	GO:0015837	amine transport	11/800	0.00348858	0.0316088	SYT8/SLC18A2/NTSR1/TH/ADRA2A/HTR2A/SLC22A16/RGS4/SNCG/AQP9/SYT1	11
BP	GO:0001911	negative regulation of leukocyte mediated cytotoxicity	5/800	0.0035996	0.032174	FCGR2B/HLA-B/SERPINB4/CEACAM1/HLA-G	5
BP	GO:0050927	positive regulation of positive chemotaxis	5/800	0.0035996	0.032174	SCG2/FGF10/CXCL8/ITGA2/AZU1	5
BP	GO:0061436	establishment of skin barrier	5/800	0.0035996	0.032174	MET/GRHL3/ABCA12/KRT16/SFN	5
BP	GO:0062149	detection of stimulus involved in sensory perception of pain	5/800	0.0035996	0.032174	NTRK1/NTSR1/SCN1A/HTR2A/ITGA2	5
BP	GO:0097186	amelogenesis	5/800	0.0035996	0.032174	PERP/ITGB6/CFTR/AMTN/MMP20	5
BP	GO:0098581	detection of external biotic stimulus	5/800	0.0035996	0.032174	HLA-B/NOD2/HLA-DRB1/CLEC6A/LBP	5
BP	GO:1903306	negative regulation of regulated secretory pathway	5/800	0.0035996	0.032174	FCGR2B/SPI1/CCR2/ADRA2A/CEACAM1	5
BP	GO:0090276	regulation of peptide hormone secretion	16/800	0.00373145	0.0332883	C1QTNF12/GPR68/EFNA5/ADRA2A/IFNG/FGG/FFAR4/HLA-DRB1/FGB/TNFSF11/ABCA12/CFTR/VSNL1/ADCY8/GRP/ALOX5	16
BP	GO:0030224	monocyte differentiation	6/800	0.0038052	0.0338159	GPR68/IL31RA/CD74/HLA-DRB1/DCSTAMP/CSF2	6
BP	GO:0043368	positive T cell selection	6/800	0.0038052	0.0338159	IL12B/SPN/CD3D/CD74/BATF/FOXP3	6
BP	GO:0006956	complement activation	13/800	0.00389114	0.0345134	CFHR1/CR1L/C1R/C1S/C3/C2/CRP/CFH/CD55/CFB/FCN1/IGLL1/IGLL5	13
BP	GO:0002713	negative regulation of B cell mediated immunity	4/800	0.0039311	0.034537	FCGR2B/CR1L/CD55/FOXP3	4
BP	GO:0002890	negative regulation of immunoglobulin mediated immune response	4/800	0.0039311	0.034537	FCGR2B/CR1L/CD55/FOXP3	4
BP	GO:0010919	regulation of inositol phosphate biosynthetic process	4/800	0.0039311	0.034537	HRH1/NTSR1/P2RY6/PTH	4
BP	GO:0045342	MHC class II biosynthetic process	4/800	0.0039311	0.034537	SPI1/CIITA/IFNG/AZU1	4
BP	GO:0045780	positive regulation of bone resorption	4/800	0.0039311	0.034537	ADAM8/MC4R/TNFSF11/DCSTAMP	4
BP	GO:0071322	cellular response to carbohydrate stimulus	14/800	0.00406123	0.0356127	NPTX1/C1QTNF12/GPR68/TH/ICAM1/EFNA5/ADRA2A/HLA-DRB1/COLEC12/ABCA12/CFTR/VSNL1/ADCY8/PTPRN	14
BP	GO:0008037	cell recognition	19/800	0.00413614	0.0361645	LGALS3/SPACA3/CCL19/NCR3/MEGF10/CRP/EPHB3/VSTM2L/NCAM2/GAP43/COLEC12/CLGN/FCN1/IGLL1/PAEP/LBP/VCAN/IGLL5/FUT3	19
BP	GO:0032874	positive regulation of stress-activated MAPK cascade	13/800	0.00415298	0.0361645	FCGR2B/TGFB2/SPI1/CCL19/WNT16/INAVA/NOD2/IL26/TNFSF11/UNC5CL/XDH/BIRC7/WNT7A	13
BP	GO:0071333	cellular response to glucose stimulus	13/800	0.00415298	0.0361645	NPTX1/C1QTNF12/GPR68/TH/ICAM1/EFNA5/ADRA2A/HLA-DRB1/ABCA12/CFTR/VSNL1/ADCY8/PTPRN	13
BP	GO:0034113	heterotypic cell-cell adhesion	8/800	0.0041554	0.0361645	ITGB2/CD2/PERP/FGG/FGB/DSC2/IL1RN/CEACAM6	8
BP	GO:0002407	dendritic cell chemotaxis	5/800	0.00430294	0.0368937	SPI1/SLAMF8/CCR2/CCR6/CCL19	5
BP	GO:0010954	positive regulation of protein processing	5/800	0.00430294	0.0368937	ADAM8/ANXA2/NKD2/S100A10/SPON1	5
BP	GO:0050926	regulation of positive chemotaxis	5/800	0.00430294	0.0368937	SCG2/FGF10/CXCL8/ITGA2/AZU1	5
BP	GO:0050951	sensory perception of temperature stimulus	5/800	0.00430294	0.0368937	NTRK1/NTSR1/ADRA2A/HTR2A/TRPM8	5
BP	GO:0060259	regulation of feeding behavior	5/800	0.00430294	0.0368937	NPSR1/MC4R/AGRP/NMU/RETN	5
BP	GO:1901623	regulation of lymphocyte chemotaxis	5/800	0.00430294	0.0368937	XCL2/CCR2/CXCL13/CXCL10/CCL7	5
BP	GO:1903901	negative regulation of viral life cycle	5/800	0.00430294	0.0368937	TRIM10/TRIM15/CIITA/CH25H/FCN1	5
BP	GO:2000316	regulation of T-helper 17 type immune response	5/800	0.00430294	0.0368937	IL12B/IL2/CLEC6A/FOXP3/NLRP10	5
BP	GO:0032760	positive regulation of tumor necrosis factor production	11/800	0.00438192	0.0375015	CYBB/IL12B/CCR2/CCL19/CD2/SPN/IFNG/NOD2/IL17A/LBP/AZU1	11
BP	GO:0061041	regulation of wound healing	13/800	0.00442886	0.0378333	PROC/HPSE/ADRA2A/FGG/PROS1/PLAU/FGB/CEACAM1/INSL3/CCN4/FAP/SERPINB2/ALOX5	13
BP	GO:0045058	T cell selection	7/800	0.00444884	0.037934	IL12B/SPN/CARD11/CD3D/CD74/BATF/FOXP3	7
BP	GO:0044706	multi-multicellular organism process	18/800	0.00447121	0.0380546	PTGS2/FBLN1/ITGA3/PGR/ITGB4/ADRA2A/PNOC/AGRP/PSG7/CORIN/ITGA2/PSG1/PSG4/PSG5/PSG9/PSG3/PSG6/EPYC	18
BP	GO:0001776	leukocyte homeostasis	10/800	0.00449817	0.0382138	TNFRSF13B/SIT1/IL2RA/CCR2/CXCL6/CD74/IL2/TNFRSF17/PMAIP1/FOXP3	10
BP	GO:0007548	sex differentiation	22/800	0.00453278	0.0384373	TGFB2/NTRK1/STRA6/TFAP2C/FST/FGF10/PGR/TNFAIP6/BMPR1B/TIFAB/SPRR2A/LHX1/TEX11/INSL3/INHBA/RXFP2/WT1/SFRP2/PTPRN/EREG/RETN/WNT7A	22
BP	GO:0032757	positive regulation of interleukin-8 production	8/800	0.00459731	0.0389132	CD2/CD74/NOD2/FCN1/LBP/CHI3L1/ELANE/NLRP10	8
BP	GO:0061564	axon development	33/800	0.0046399	0.039202	NTRK1/NPTX1/PTPRO/PTPRZ1/RAC2/LAMC2/EPHA10/BMPR1B/EFNA5/CNTN1/DCC/EPHB3/VSTM2L/NCAM2/L1CAM/LHX1/GBX2/GAP43/DCLK1/ISL2/LPAR3/S100A6/TRIM46/SEMA3C/CCKAR/TUBB3/KLK8/DRGX/CDH11/ACTBL2/S100B/FN1/WNT7A	33
BP	GO:0070304	positive regulation of stress-activated protein kinase signaling cascade	13/800	0.00471932	0.0397281	FCGR2B/TGFB2/SPI1/CCL19/WNT16/INAVA/NOD2/IL26/TNFSF11/UNC5CL/XDH/BIRC7/WNT7A	13
BP	GO:0071331	cellular response to hexose stimulus	13/800	0.00471932	0.0397281	NPTX1/C1QTNF12/GPR68/TH/ICAM1/EFNA5/ADRA2A/HLA-DRB1/ABCA12/CFTR/VSNL1/ADCY8/PTPRN	13
BP	GO:0061045	negative regulation of wound healing	9/800	0.00486349	0.0408674	PROC/FGG/PROS1/PLAU/FGB/CEACAM1/FAP/SERPINB2/ALOX5	9
BP	GO:0010819	regulation of T cell chemotaxis	4/800	0.0049696	0.0411614	XCL2/CCR2/CXCL13/CXCL10	4
BP	GO:0032604	granulocyte macrophage colony-stimulating factor production	4/800	0.0049696	0.0411614	IL12B/IL18/CD80/PAEP	4
BP	GO:0032645	regulation of granulocyte macrophage colony-stimulating factor production	4/800	0.0049696	0.0411614	IL12B/IL18/CD80/PAEP	4
BP	GO:0036065	fucosylation	4/800	0.0049696	0.0411614	FUT2/FUT6/FUT9/FUT3	4
BP	GO:0038065	collagen-activated signaling pathway	4/800	0.0049696	0.0411614	ITGA11/OSCAR/ITGA2/COL1A1	4
BP	GO:0070206	protein trimerization	4/800	0.0049696	0.0411614	CD74/ALOX5AP/COL1A2/HLA-G	4
BP	GO:0072376	protein activation cascade	4/800	0.0049696	0.0411614	FBLN1/FGG/FGB/FN1	4
BP	GO:0090399	replicative senescence	4/800	0.0049696	0.0411614	MME/WNT16/TERT/CDKN2A	4
BP	GO:0002715	regulation of natural killer cell mediated immunity	7/800	0.00498732	0.0412345	IL12B/NCR3/HLA-B/SERPINB4/LAG3/CEACAM1/HLA-G	7
BP	GO:0042113	B cell activation	25/800	0.00499766	0.0412462	FCGR2B/CDH17/TNFRSF13B/SPI1/SLAMF8/NTRK1/CCR6/LAX1/MNDA/CARD11/CTLA4/CD74/IL2/NOD2/IL11/TNFSF4/CD79A/BATF/FOXP3/INHBA/IGLL1/CD70/MZB1/IL4I1/IGLL5	25
BP	GO:0010742	macrophage derived foam cell differentiation	6/800	0.0050192	0.0412769	IL18/APOB/CRP/PLA2G2A/CSF2/ALOX15B	6
BP	GO:0048246	macrophage chemotaxis	6/800	0.0050192	0.0412769	SLAMF8/CKLF/LGALS3/AZU1/SAA1/CXCL17	6
BP	GO:0032623	interleukin-2 production	8/800	0.0050744	0.0415582	CCR2/CARD11/LAG3/RUNX1/CD80/NOD2/FOXP3/VTCN1	8
BP	GO:0032663	regulation of interleukin-2 production	8/800	0.0050744	0.0415582	CCR2/CARD11/LAG3/RUNX1/CD80/NOD2/FOXP3/VTCN1	8
BP	GO:0002227	innate immune response in mucosa	5/800	0.00509895	0.0415582	DEFB1/NOD2/RNASE3/RNASE2/BPIFB1	5
BP	GO:0002418	immune response to tumor cell	5/800	0.00509895	0.0415582	IL12B/CD274/HLA-DRB1/CEACAM1/IL4I1	5
BP	GO:0071624	positive regulation of granulocyte chemotaxis	5/800	0.00509895	0.0415582	RAC2/CCL19/CD74/CXCL8/LBP	5
BP	GO:0002702	positive regulation of production of molecular mediator of immune response	12/800	0.00510726	0.0415582	IL18/RSAD2/KLK7/INAVA/CD74/IL2/NOD2/TNFSF4/CD55/IL17A/MZB1/HLA-G	12
BP	GO:0009581	detection of external stimulus	13/800	0.00534614	0.0433496	LHFPL5/NTRK1/NTSR1/SCN1A/GUCA1A/HTR2A/TRPM8/SLC24A2/DRGX/ITGA2/CSRP3/RP1/COL11A1	13
BP	GO:0071326	cellular response to monosaccharide stimulus	13/800	0.00534614	0.0433496	NPTX1/C1QTNF12/GPR68/TH/ICAM1/EFNA5/ADRA2A/HLA-DRB1/ABCA12/CFTR/VSNL1/ADCY8/PTPRN	13
BP	GO:0010810	regulation of cell-substrate adhesion	18/800	0.00541785	0.0438542	PTPRO/RAC2/FBLN1/ITGA3/EGFL6/TACSTD2/EFNA5/FGG/SPOCK2/MMP12/PLAU/FGB/S100A10/GREM1/CDKN2A/COL1A1/FN1/CEACAM6	18
BP	GO:0007631	feeding behavior	11/800	0.0054482	0.0438993	STRA6/NPSR1/MC4R/TH/MCHR1/AGRP/PMCH/GDF15/NMU/DMBX1/RETN	11
BP	GO:0002455	humoral immune response mediated by circulating immunoglobulin	12/800	0.00545653	0.0438993	FCGR2B/CR1L/C1R/C1S/C3/C2/CRP/NOD2/CD55/LTA/IGLL1/IGLL5	12
BP	GO:0007411	axon guidance	19/800	0.00546134	0.0438993	NTRK1/PTPRO/RAC2/LAMC2/EPHA10/BMPR1B/EFNA5/CNTN1/DCC/EPHB3/VSTM2L/L1CAM/LHX1/GBX2/GAP43/ISL2/SEMA3C/TUBB3/DRGX	19
BP	GO:0045055	regulated exocytosis	19/800	0.00546134	0.0438993	FCGR2B/SPI1/SYT8/MILR1/ITGAM/RAC2/CCR2/ITGB2/ANXA3/HCK/ADRA2A/MRGPRX2/HTR2A/SYNGR3/CEACAM1/ABCA12/SYT1/WNT7A/CD177	19
BP	GO:0007157	heterophilic cell-cell adhesion via plasma membrane cell adhesion molecules	7/800	0.00557335	0.0446447	ICAM1/JAML/CBLN1/NECTIN4/CEACAM8/PSG5/CEACAM6	7
BP	GO:0050982	detection of mechanical stimulus	7/800	0.00557335	0.0446447	LHFPL5/NTRK1/SCN1A/HTR2A/ITGA2/CSRP3/COL11A1	7
BP	GO:0030888	regulation of B cell proliferation	8/800	0.00558844	0.0446882	FCGR2B/TNFRSF13B/MNDA/CARD11/CTLA4/CD74/IL2/MZB1	8
BP	GO:1903035	negative regulation of response to wounding	10/800	0.0056949	0.0453698	PROC/FGG/PROS1/PLAU/FGB/CEACAM1/KLK8/FAP/SERPINB2/ALOX5	10
BP	GO:0097485	neuron projection guidance	19/800	0.0057128	0.0453698	NTRK1/PTPRO/RAC2/LAMC2/EPHA10/BMPR1B/EFNA5/CNTN1/DCC/EPHB3/VSTM2L/L1CAM/LHX1/GBX2/GAP43/ISL2/SEMA3C/TUBB3/DRGX	19
BP	GO:0002691	regulation of cellular extravasation	6/800	0.00572267	0.0453698	ADAM8/CCR2/ICAM1/XG/FUT9/ELANE	6
BP	GO:0009595	detection of biotic stimulus	6/800	0.00572267	0.0453698	HLA-B/NOD2/HLA-DRB1/CLEC6A/LBP/FAP	6
BP	GO:0090077	foam cell differentiation	6/800	0.00572267	0.0453698	IL18/APOB/CRP/PLA2G2A/CSF2/ALOX15B	6
BP	GO:0009312	oligosaccharide biosynthetic process	5/800	0.00599383	0.0470364	FUT2/FUT6/FUT9/ST6GALNAC5/FUT3	5
BP	GO:0010818	T cell chemotaxis	5/800	0.00599383	0.0470364	XCL2/CCR2/CXCL13/CXCL10/CXCL11	5
BP	GO:0031342	negative regulation of cell killing	5/800	0.00599383	0.0470364	FCGR2B/HLA-B/SERPINB4/CEACAM1/HLA-G	5
BP	GO:0042104	positive regulation of activated T cell proliferation	5/800	0.00599383	0.0470364	IL12B/IL2RA/IL18/IL2/TNFSF9	5
BP	GO:0042634	regulation of hair cycle	5/800	0.00599383	0.0470364	TGFB2/FST/HPSE/KRT17/TERT	5
BP	GO:1903319	positive regulation of protein maturation	5/800	0.00599383	0.0470364	ADAM8/ANXA2/NKD2/S100A10/SPON1	5
BP	GO:0001678	cellular glucose homeostasis	14/800	0.00612218	0.0477469	NPTX1/C1QTNF12/GPR68/TH/ICAM1/EFNA5/ADRA2A/HK3/HLA-DRB1/ABCA12/CFTR/VSNL1/ADCY8/PTPRN	14
BP	GO:0048592	eye morphogenesis	14/800	0.00612218	0.0477469	STRA6/COL8A2/TH/WNT16/COL5A2/ALDH1A3/LHX1/PITX2/COL5A1/MFAP5/PROM1/WNT2/RP1/PITX3	14
BP	GO:0002260	lymphocyte homeostasis	8/800	0.00614121	0.0477469	TNFRSF13B/SIT1/IL2RA/CD74/IL2/TNFRSF17/PMAIP1/FOXP3	8
BP	GO:0070613	regulation of protein processing	8/800	0.00614121	0.0477469	ADAM8/CST7/ANXA2/NLRP7/RUNX1/NKD2/S100A10/SPON1	8
BP	GO:0023061	signal release	31/800	0.00614652	0.0477469	SYT8/C1QTNF12/OSM/GPR68/MC4R/EFNA5/ADRA2A/IFNG/FGG/HTR2A/FFAR4/IL11/HLA-DRB1/FGB/TNFSF11/PTGES/CGA/ABCA12/SNCG/CCKAR/CFTR/INHBA/VSNL1/ADCY8/IL1RN/GRP/PTPRN/ALOX5/SYT1/RETN/WNT7A	31
BP	GO:0002693	positive regulation of cellular extravasation	4/800	0.00617719	0.0477469	ADAM8/CCR2/ICAM1/XG	4
BP	GO:0002827	positive regulation of T-helper 1 type immune response	4/800	0.00617719	0.0477469	IL12B/IL18/CCR2/NLRP10	4
BP	GO:0030889	negative regulation of B cell proliferation	4/800	0.00617719	0.0477469	FCGR2B/TNFRSF13B/MNDA/CTLA4	4
BP	GO:0060263	regulation of respiratory burst	4/800	0.00617719	0.0477469	SLAMF8/RAC2/JCHAIN/LBP	4
BP	GO:0043122	regulation of I-kappaB kinase/NF-kappaB signaling	20/800	0.00620966	0.0479179	NEK6/TNIP3/CCL19/LURAP1L/SECTM1/PIM2/S100A4/CARD11/INAVA/CLEC4D/CD74/NOD2/UBD/HLA-DRB1/CLEC6A/ROR1/TNFSF11/BIRC3/UNC5CL/S100B	20
BP	GO:0071706	tumor necrosis factor superfamily cytokine production	16/800	0.00632662	0.0486582	CYBB/ADAM8/IL12B/CD274/CCR2/CCL19/CD2/SPN/IFNG/NOD2/IL17A/FOXP3/GPNMB/LBP/AZU1/IL37	16
BP	GO:1903555	regulation of tumor necrosis factor superfamily cytokine production	16/800	0.00632662	0.0486582	CYBB/ADAM8/IL12B/CD274/CCR2/CCL19/CD2/SPN/IFNG/NOD2/IL17A/FOXP3/GPNMB/LBP/AZU1/IL37	16
BP	GO:0009582	detection of abiotic stimulus	13/800	0.00640955	0.0492143	LHFPL5/NTRK1/NTSR1/SCN1A/GUCA1A/HTR2A/TRPM8/SLC24A2/DRGX/ITGA2/CSRP3/RP1/COL11A1	13
BP	GO:0051281	positive regulation of release of sequestered calcium ion into cytosol	6/800	0.00649545	0.049709	NPSR1/NTSR1/CXCL9/CXCL10/CXCL11/P2RY6	6
BP	GO:0072538	T-helper 17 type immune response	6/800	0.00649545	0.049709	IL12B/IL2/CLEC6A/BATF/FOXP3/NLRP10	6
BP	GO:0071887	leukocyte apoptotic process	11/800	0.00670933	0.0512611	ADAM8/LGALS3/CD274/IL2RA/CCL19/CD74/IL2/NOD2/CLC/CDKN2A/BIRC7	11
BP	GO:1903305	regulation of regulated secretory pathway	13/800	0.00679917	0.0518619	FCGR2B/SPI1/SYT8/ITGAM/RAC2/CCR2/ITGB2/ADRA2A/HTR2A/CEACAM1/SYT1/WNT7A/CD177	13
BP	GO:0001818	negative regulation of cytokine production	26/800	0.0069219	0.0527112	FCGR2B/TGFB2/IL12B/CD274/TIGIT/IFNG/LAG3/NLRP7/IFNL1/CARD17/NOD2/FFAR4/HLA-DRB1/PDCD1LG2/TNFSF4/CEACAM1/FOXP3/IL1RL1/INHBA/IL36RN/GPNMB/LBP/ELANE/FN1/PSG9/IL37	26
BP	GO:0150077	regulation of neuroinflammatory response	6/800	0.00734125	0.0554926	PTGS2/CST7/IL18/CTSC/LDLR/MMP3	6
BP	GO:0001915	negative regulation of T cell mediated cytotoxicity	3/800	0.00735906	0.0554926	FCGR2B/CEACAM1/HLA-G	3
BP	GO:0038007	netrin-activated signaling pathway	3/800	0.00735906	0.0554926	DCC/UNC5CL/TUBB3	3
BP	GO:0045348	positive regulation of MHC class II biosynthetic process	3/800	0.00735906	0.0554926	CIITA/IFNG/AZU1	3
BP	GO:0045625	regulation of T-helper 1 cell differentiation	3/800	0.00735906	0.0554926	CCL19/CD80/TNFSF4	3
BP	GO:0045657	positive regulation of monocyte differentiation	3/800	0.00735906	0.0554926	CD74/HLA-DRB1/DCSTAMP	3
BP	GO:0033674	positive regulation of kinase activity	32/800	0.00745476	0.0561229	TGFB2/NTRK1/ADAM8/IL12B/TCL1A/GRM5/MET/IL18/CCL19/EPHA10/BMPR1B/EFNA5/ADRA2A/ERBB3/IFNG/CD74/IL2/HTR2A/NOD2/EPHB3/HLA-DRB1/ROS1/ROR1/TNFSF11/FPR2/ADCY8/INSRR/GREM1/CHI3L1/ELANE/AZU1/EREG	32
BP	GO:0002483	antigen processing and presentation of endogenous peptide antigen	4/800	0.00756488	0.0564016	HLA-B/HLA-DRA/HLA-DRB1/HLA-G	4
BP	GO:0032634	interleukin-5 production	4/800	0.00756488	0.0564016	IFNL1/CRLF2/FOXP3/IL1RL1	4
BP	GO:0032674	regulation of interleukin-5 production	4/800	0.00756488	0.0564016	IFNL1/CRLF2/FOXP3/IL1RL1	4
BP	GO:0043031	negative regulation of macrophage activation	4/800	0.00756488	0.0564016	FCGR2B/CST7/IL31RA/LDLR	4
BP	GO:0045953	negative regulation of natural killer cell mediated cytotoxicity	4/800	0.00756488	0.0564016	HLA-B/SERPINB4/CEACAM1/HLA-G	4
BP	GO:0051797	regulation of hair follicle development	4/800	0.00756488	0.0564016	TGFB2/FST/HPSE/KRT17	4
BP	GO:0050852	T cell receptor signaling pathway	12/800	0.00796955	0.0593232	SLA2/LGALS3/FCHO1/CARD11/CTLA4/HLA-DPB1/HLA-DRB1/CEACAM1/HLA-DQB1/FOXP3/KCNN4/VTCN1	12
BP	GO:0002720	positive regulation of cytokine production involved in immune response	8/800	0.00804991	0.0597293	IL18/RSAD2/INAVA/CD74/NOD2/TNFSF4/CD55/HLA-G	8
BP	GO:1903317	regulation of protein maturation	8/800	0.00804991	0.0597293	ADAM8/CST7/ANXA2/NLRP7/RUNX1/NKD2/S100A10/SPON1	8
BP	GO:0007626	locomotory behavior	16/800	0.00808591	0.0597499	GRM5/DPP4/SLC18A2/NTSR1/HPGDS/TH/ALDH1A3/CNTN1/SCN1A/SLURP1/NPY2R/SNCG/KCND2/ADCY8/DMBX1/PITX3	16
BP	GO:0038094	Fc-gamma receptor signaling pathway	5/800	0.00810431	0.0597499	FCGR2B/HCK/CLEC4D/MYO1G/PLPP4	5
BP	GO:0060142	regulation of syncytium formation by plasma membrane fusion	5/800	0.00810431	0.0597499	CXCL9/CXCL10/DCSTAMP/GDF15/OCSTAMP	5
BP	GO:0060292	long-term synaptic depression	5/800	0.00810431	0.0597499	CBLN1/DRD5/SLC24A2/ADCY8/SORCS3	5
BP	GO:0032755	positive regulation of interleukin-6 production	10/800	0.00822589	0.0604538	IFNG/INAVA/CD74/NOD2/TNFSF4/IL17A/LBP/NLRP10/EREG/IL36A	10
BP	GO:2001237	negative regulation of extrinsic apoptotic signaling pathway	10/800	0.00822589	0.0604538	SCG2/LGALS3/FGF10/ICAM1/FGG/FGB/SCRT2/CSF2/TERT/SFRP2	10
BP	GO:0002347	response to tumor cell	6/800	0.00826375	0.0606358	SPI1/IL12B/CD274/HLA-DRB1/CEACAM1/IL4I1	6
BP	GO:1904645	response to amyloid-beta	7/800	0.008443	0.0617553	FCGR2B/GRM5/ICAM1/MMP12/FPR2/MMP3/MMP13	7
BP	GO:1905517	macrophage migration	7/800	0.008443	0.0617553	SLAMF8/CKLF/LGALS3/CCR2/AZU1/SAA1/CXCL17	7
BP	GO:0006911	phagocytosis, engulfment	12/800	0.00846454	0.0618151	FCGR2B/ITGAM/RAC2/GULP1/ITGB2/C3/MEGF10/ITGA2/IGLL1/MARCO/IGLL5/XKR4	12
BP	GO:0050795	regulation of behavior	8/800	0.00877565	0.0639862	STRA6/NPSR1/MC4R/HTR1D/AGRP/CSF2/NMU/RETN	8
BP	GO:0060349	bone morphogenesis	10/800	0.00882216	0.0642242	CDX1/BMPR1B/TIFAB/MMP16/COMP/SFRP4/COL3A1/COL1A1/SFRP2/MMP13	10
BP	GO:0031334	positive regulation of protein-containing complex assembly	16/800	0.00889073	0.0646218	CDH17/LGALS3/TCL1A/GBP5/MET/ISG15/CCL24/HCK/CXCL13/IFNG/CRACD/LCP1/CDC42EP3/CSF2/CCL11/MMP3	16
BP	GO:2000027	regulation of animal organ morphogenesis	12/800	0.00898321	0.0651916	WNT10A/FGF10/TACSTD2/LHX1/GRHL3/ROR1/CTHRC1/GREM1/WNT2/WT1/SFRP2/WNT7A	12
BP	GO:0002716	negative regulation of natural killer cell mediated immunity	4/800	0.00914293	0.0657325	HLA-B/SERPINB4/CEACAM1/HLA-G	4
BP	GO:0043373	CD4-positive, alpha-beta T cell lineage commitment	4/800	0.00914293	0.0657325	IL12B/SPN/BATF/FOXP3	4
BP	GO:0045655	regulation of monocyte differentiation	4/800	0.00914293	0.0657325	GPR68/CD74/HLA-DRB1/DCSTAMP	4
BP	GO:0070166	enamel mineralization	4/800	0.00914293	0.0657325	ITGB6/CFTR/AMTN/MMP20	4
BP	GO:0098543	detection of other organism	4/800	0.00914293	0.0657325	HLA-B/NOD2/HLA-DRB1/CLEC6A	4
BP	GO:0140131	positive regulation of lymphocyte chemotaxis	4/800	0.00914293	0.0657325	XCL2/CCR2/CXCL13/CCL7	4
BP	GO:0014002	astrocyte development	6/800	0.00926658	0.0665183	IFNG/ROR1/LDLR/S100A8/S100A9/FPR2	6
BP	GO:0002862	negative regulation of inflammatory response to antigenic stimulus	5/800	0.00933157	0.0665719	FCGR2B/IL12B/HCK/NOD2/HLA-DRB1	5
BP	GO:0045577	regulation of B cell differentiation	5/800	0.00933157	0.0665719	SLAMF8/CARD11/IL2/INHBA/IL4I1	5
BP	GO:1902042	negative regulation of extrinsic apoptotic signaling pathway via death domain receptors	5/800	0.00933157	0.0665719	ICAM1/FGG/FGB/SCRT2/SFRP2	5
BP	GO:2000515	negative regulation of CD4-positive, alpha-beta T cell activation	5/800	0.00933157	0.0665719	CD274/IL2/RUNX1/TNFSF4/FOXP3	5
BP	GO:0042698	ovulation cycle	8/800	0.00954918	0.0680195	TGFB2/PGR/TNFAIP6/BMPR1B/INHBA/PTPRN/EREG/RETN	8
BP	GO:0034764	positive regulation of transmembrane transport	17/800	0.00976059	0.068866	C1QTNF12/CCR2/NPSR1/NTSR1/C3/IFNG/CXCL9/CXCL10/CFTR/CXCL11/KCNE5/KCNN4/TERT/STAC/P2RY6/CACNG4/PTH	17
BP	GO:0001660	fever generation	3/800	0.00980188	0.068866	PTGS2/TNFSF11/PTGES	3
BP	GO:0002759	regulation of antimicrobial humoral response	3/800	0.00980188	0.068866	KLK7/NOD2/IL17A	3
BP	GO:0002924	negative regulation of humoral immune response mediated by circulating immunoglobulin	3/800	0.00980188	0.068866	FCGR2B/CR1L/CD55	3
BP	GO:0019372	lipoxygenase pathway	3/800	0.00980188	0.068866	ALOX5AP/ALOX15B/ALOX5	3
BP	GO:0032377	regulation of intracellular lipid transport	3/800	0.00980188	0.068866	ANXA2/PCSK9/ABCA12	3
BP	GO:0060900	embryonic camera-type eye formation	3/800	0.00980188	0.068866	STRA6/WNT16/ALDH1A3	3
BP	GO:0099150	regulation of postsynaptic specialization assembly	3/800	0.00980188	0.068866	NPTX1/CBLN1/GAP43	3
BP	GO:2000508	regulation of dendritic cell chemotaxis	3/800	0.00980188	0.068866	SPI1/SLAMF8/CCR6	3
BP	GO:0008625	extrinsic apoptotic signaling pathway via death domain receptors	9/800	0.0100414	0.0703354	SPI1/LGALS3/BMPR1B/ICAM1/FGG/FGB/SCRT2/PMAIP1/SFRP2	9
BP	GO:2000106	regulation of leukocyte apoptotic process	9/800	0.0100414	0.0703354	ADAM8/LGALS3/CD274/CCL19/CD74/IL2/NOD2/CDKN2A/BIRC7	9
BP	GO:0006022	aminoglycan metabolic process	12/800	0.0100945	0.0706008	CHI3L2/SPOCK3/DCN/CHST6/B3GNT6/TNFAIP6/HPSE/SPOCK2/GALNT5/CHI3L1/B3GNT3/HAS1	12
BP	GO:0042100	B cell proliferation	10/800	0.0101135	0.0706265	FCGR2B/TNFRSF13B/MNDA/CARD11/CTLA4/CD74/IL2/CD79A/CD70/MZB1	10
BP	GO:0002063	chondrocyte development	5/800	0.010681	0.0743652	BMPR1B/RFLNA/COMP/SFRP2/COL11A1	5
BP	GO:0010669	epithelial structure maintenance	5/800	0.010681	0.0743652	INAVA/CRACD/NOD2/VSIG1/IL17A	5
BP	GO:0030449	regulation of complement activation	4/800	0.0109208	0.0753549	CR1L/C3/CFH/CD55	4
BP	GO:0043371	negative regulation of CD4-positive, alpha-beta T cell differentiation	4/800	0.0109208	0.0753549	IL2/RUNX1/TNFSF4/FOXP3	4
BP	GO:0045063	T-helper 1 cell differentiation	4/800	0.0109208	0.0753549	CCL19/SPN/CD80/TNFSF4	4
BP	GO:0060065	uterus development	4/800	0.0109208	0.0753549	TGFB2/STRA6/LHX1/WNT7A	4
BP	GO:0061760	antifungal innate immune response	4/800	0.0109208	0.0753549	SPI1/CLEC4D/CLEC4C/CLEC6A	4
BP	GO:0071636	positive regulation of transforming growth factor beta production	4/800	0.0109208	0.0753549	PTGS2/FOXP3/SERPINB7/LUM	4
BP	GO:2000273	positive regulation of signaling receptor activity	6/800	0.0115275	0.0793222	CCR2/ADRA2A/IFNG/GREM1/CACNG4/EREG	6
BP	GO:1903034	regulation of response to wounding	14/800	0.01153	0.0793222	PROC/HPSE/ADRA2A/FGG/PROS1/PLAU/FGB/CEACAM1/INSL3/KLK8/CCN4/FAP/SERPINB2/ALOX5	14
BP	GO:0050708	regulation of protein secretion	19/800	0.0116447	0.0799923	TGFB2/ADAM8/IL12B/C1QTNF12/GPR68/RSAD2/EFNA5/ADRA2A/IFNG/FGG/HLA-DRB1/FGB/ABCA12/CFTR/VSNL1/ADCY8/KCNN4/SAA1/ALOX5	19
BP	GO:0050864	regulation of B cell activation	16/800	0.0116935	0.080209	FCGR2B/TNFRSF13B/SLAMF8/MNDA/CARD11/CTLA4/CD74/IL2/NOD2/TNFSF4/FOXP3/INHBA/IGLL1/MZB1/IL4I1/IGLL5	16
BP	GO:0007584	response to nutrient	13/800	0.0118164	0.080888	CYBB/PTGS2/CDKN2B/AQP3/NOD2/CXCL10/LTA/ITGA2/POSTN/COL1A1/SFRP2/CYP26A1/PTH	13
BP	GO:0007249	I-kappaB kinase/NF-kappaB signaling	21/800	0.0118275	0.080888	NEK6/TNIP3/CCL19/LURAP1L/SECTM1/PIM2/S100A4/CARD11/INAVA/CLEC4D/TIFAB/CD74/NOD2/UBD/HLA-DRB1/CLEC6A/ROR1/TNFSF11/BIRC3/UNC5CL/S100B	21
BP	GO:0045907	positive regulation of vasoconstriction	5/800	0.0121578	0.0830244	PTGS2/HRH1/FGG/HTR2A/FGB	5
BP	GO:0046849	bone remodeling	9/800	0.0124616	0.0849739	ADAM8/CTSK/MC4R/WNT16/TNFSF11/DCSTAMP/CTHRC1/GREM1/PTH	9
BP	GO:0051897	positive regulation of protein kinase B signaling	11/800	0.0126185	0.085028	ADAM8/C1QTNF12/OSM/MET/IL18/CCL19/HPSE/IL26/TNFSF11/GDF15/CHI3L1	11
BP	GO:0001553	luteinization	3/800	0.0126609	0.085028	INHBA/PTPRN/RETN	3
BP	GO:0002645	positive regulation of tolerance induction	3/800	0.0126609	0.085028	CD274/FOXP3/HLA-G	3
BP	GO:0002887	negative regulation of myeloid leukocyte mediated immunity	3/800	0.0126609	0.085028	FCGR2B/SPI1/CCR2	3
BP	GO:0031650	regulation of heat generation	3/800	0.0126609	0.085028	PTGS2/TNFSF11/PTGES	3
BP	GO:0032908	regulation of transforming growth factor beta1 production	3/800	0.0126609	0.085028	FOXP3/SERPINB7/LUM	3
BP	GO:0046541	saliva secretion	3/800	0.0126609	0.085028	FGF10/TIFAB/KCNN4	3
BP	GO:0048521	negative regulation of behavior	3/800	0.0126609	0.085028	NPSR1/MC4R/RETN	3
BP	GO:1904321	response to forskolin	3/800	0.0126609	0.085028	EFNA5/CFTR/ADCY8	3
BP	GO:1904322	cellular response to forskolin	3/800	0.0126609	0.085028	EFNA5/CFTR/ADCY8	3
BP	GO:0043547	positive regulation of GTPase activity	20/800	0.0126843	0.085028	NTRK1/PRTN3/XCL2/TBC1D2/CCL19/CCL24/CXCL13/NGEF/CCL23/GRHL3/RGS4/TGM2/S100A10/CCL13/CCL1/CCL22/CCL11/CCL7/CCL20/CCL17	20
BP	GO:0050808	synapse organization	28/800	0.0126899	0.085028	FCGR2B/NTRK1/NPTX1/PTPRO/IL1RAPL2/GRM5/ITGAM/CNKSR2/ITGA3/CBLN4/C3/PDZRN3/EFNA5/CBLN1/NGEF/SPOCK2/EPHB3/L1CAM/GAP43/SPTBN2/SNCG/THBS2/KLK8/INA/SRPX2/ACTBL2/DRP2/WNT7A	28
BP	GO:0051607	defense response to virus	21/800	0.0127104	0.085042	IL12B/OASL/RSAD2/TRIM15/ISG15/APOBEC3A/IFIT2/IFNG/CXCL9/ZBP1/IFNL1/CXCL10/IFNL2/MMP12/BIRC3/RNASE2/PMAIP1/FOXP3/IFNL3/CD207/AZU1	21
BP	GO:0034765	regulation of ion transmembrane transport	31/800	0.0127613	0.0852593	KCNK6/CYBB/GRM5/SLN/CCR2/CACNG6/NPSR1/NTSR1/ADRA2A/IFNG/CXCL9/JSRP1/SCN1A/CATSPER1/CXCL10/NALCN/JPH3/PCSK9/RGS4/KCNQ3/CFTR/KCND2/CXCL11/KCNE5/FXYD3/KCNN4/STAC/P2RY6/CACNG1/KCNJ6/CACNG4	31
BP	GO:0001919	regulation of receptor recycling	4/800	0.012907	0.0853705	ANXA2/NSG1/PCSK9/LDLR	4
BP	GO:0002363	alpha-beta T cell lineage commitment	4/800	0.012907	0.0853705	IL12B/SPN/BATF/FOXP3	4
BP	GO:0007398	ectoderm development	4/800	0.012907	0.0853705	ITGAM/KRT6B/LHX1/GRHL3	4
BP	GO:0021533	cell differentiation in hindbrain	4/800	0.012907	0.0853705	CBLN1/LHX5/LHX1/WNT7A	4
BP	GO:0035584	calcium-mediated signaling using intracellular calcium source	4/800	0.012907	0.0853705	GRM5/DEFB1/AZU1/CCL20	4
BP	GO:0043369	CD4-positive or CD8-positive, alpha-beta T cell lineage commitment	4/800	0.012907	0.0853705	IL12B/SPN/BATF/FOXP3	4
BP	GO:0046597	negative regulation of viral entry into host cell	4/800	0.012907	0.0853705	TRIM10/CIITA/CH25H/FCN1	4
BP	GO:0050830	defense response to Gram-positive bacterium	10/800	0.0131221	0.0866697	DEFB1/CRP/NOD2/RNASE3/LYZ/IL17A/LTA/PLA2G2A/KRT6A/LBP	10
BP	GO:0043270	positive regulation of ion transport	20/800	0.0131608	0.0867457	LGALS3/CCR2/NPSR1/NTSR1/ADRA2A/IFNG/CXCL9/CNTN1/CXCL10/MCHR1/TNFSF11/PTGES/CFTR/CXCL11/KCNE5/KCNN4/STAC/P2RY6/CACNG4/SYT1	20
BP	GO:0140546	defense response to symbiont	21/800	0.0131711	0.0867457	IL12B/OASL/RSAD2/TRIM15/ISG15/APOBEC3A/IFIT2/IFNG/CXCL9/ZBP1/IFNL1/CXCL10/IFNL2/MMP12/BIRC3/RNASE2/PMAIP1/FOXP3/IFNL3/CD207/AZU1	21
BP	GO:0060541	respiratory system development	16/800	0.0133338	0.0876927	STRA6/ITGA3/MME/FGF10/PGR/HSD11B1/FOXA1/ALDH1A3/MMP12/ITGB6/ABCA12/COL3A1/WNT2/WT1/LOX/CHI3L1	16
BP	GO:0001942	hair follicle development	9/800	0.0133575	0.0877238	TGFB2/LGR5/WNT10A/FST/FGF10/HPSE/FOXQ1/INHBA/KRT17	9
BP	GO:0051960	regulation of nervous system development	29/800	0.0134927	0.0884862	NTRK1/CST7/GRM5/PTPRZ1/MME/EFNA5/CDKN2B/CTSC/IFNG/CBLN1/DCC/EPHB3/L1CAM/GBX2/LPAR3/LDLR/TRIM46/SEMA3C/TGM2/LTA/THBS2/KLK8/SRPX2/HES2/WNT2/PITX3/CCL11/FN1/WNT7A	29
BP	GO:0002335	mature B cell differentiation	5/800	0.0137671	0.0894558	FCGR2B/CDH17/SPI1/SLAMF8/IL2	5
BP	GO:0021696	cerebellar cortex morphogenesis	5/800	0.0137671	0.0894558	CBLN1/LHX5/LHX1/SPTBN2/WNT7A	5
BP	GO:0032743	positive regulation of interleukin-2 production	5/800	0.0137671	0.0894558	CCR2/CARD11/RUNX1/CD80/VTCN1	5
BP	GO:0048536	spleen development	5/800	0.0137671	0.0894558	CDH17/FGF10/CDKN2B/PITX2/NKX3-2	5
BP	GO:0090322	regulation of superoxide metabolic process	5/800	0.0137671	0.0894558	ITGAM/ITGB2/CRP/FPR2/CD177	5
BP	GO:2000352	negative regulation of endothelial cell apoptotic process	5/800	0.0137671	0.0894558	SCG2/ICAM1/FGG/FGB/TERT	5
BP	GO:2001236	regulation of extrinsic apoptotic signaling pathway	13/800	0.0137758	0.0894558	SCG2/LGALS3/FGF10/BMPR1B/ICAM1/FGG/FGB/SCRT2/PMAIP1/INHBA/CSF2/TERT/SFRP2	13
BP	GO:0008585	female gonad development	10/800	0.0139695	0.0905865	FST/PGR/TNFAIP6/BMPR1B/SPRR2A/INHBA/WT1/PTPRN/EREG/RETN	10
BP	GO:0051896	regulation of protein kinase B signaling	15/800	0.0140214	0.0907957	NTRK1/ADAM8/C1QTNF12/OSM/MET/IL18/CCL19/HPSE/IL26/TNFSF11/SFRP5/GDF15/XDH/CHI3L1/HLA-G	15
BP	GO:0099024	plasma membrane invagination	12/800	0.0140743	0.0910115	FCGR2B/ITGAM/RAC2/GULP1/ITGB2/C3/MEGF10/ITGA2/IGLL1/MARCO/IGLL5/XKR4	12
BP	GO:0032964	collagen biosynthetic process	6/800	0.0141517	0.091257	CIITA/RUNX1/COL5A1/SERPINB7/ITGA2/COL1A1	6
BP	GO:0042220	response to cocaine	6/800	0.0141517	0.091257	HTR2A/RGS4/DRD5/TGM2/PITX3/CACNG4	6
BP	GO:0070227	lymphocyte apoptotic process	8/800	0.0141969	0.0914212	ADAM8/LGALS3/CD274/IL2RA/CD74/IL2/CLC/BIRC7	8
BP	GO:0051092	positive regulation of NF-kappaB transcription factor activity	13/800	0.0144815	0.0931238	NTRK1/ADAM8/IL18/TRIM15/NTSR1/CARD11/NOD2/ROR1/TNFSF11/S100A8/S100A9/GREM1/TNFSF18	13
BP	GO:0060284	regulation of cell development	32/800	0.0145305	0.0933096	SLAMF8/GRM5/PROC/PTPRZ1/FBLN1/GPR68/MME/TACSTD2/EFNA5/CDKN2B/MYF6/IFNG/FGG/DCC/RFLNA/L1CAM/FGB/TNFSF11/LPAR3/LDLR/TRIM46/SEMA3C/TGM2/LTA/S100A10/PAEP/HES2/WNT2/PITX3/CCL11/FN1/WNT7A	32
BP	GO:0006816	calcium ion transport	28/800	0.014664	0.0940362	PTGS2/LGALS3/SLN/MCUB/CACNG6/CCL19/ANXA2/NPSR1/NTSR1/ADRA2A/CXCL9/JSRP1/HTR2A/CATSPER1/CXCL10/TRPM8/MCHR1/NALCN/JPH3/RGS4/SLC24A2/CXCL11/KCNN4/STAC/P2RY6/CACNG1/PLPP4/CACNG4	28
BP	GO:0048593	camera-type eye morphogenesis	11/800	0.0149954	0.0960283	STRA6/COL8A2/TH/WNT16/ALDH1A3/LHX1/PITX2/PROM1/WNT2/RP1/PITX3	11
BP	GO:0032635	interleukin-6 production	14/800	0.0153576	0.098077	HLA-B/IFNG/INAVA/CD74/NOD2/TNFSF4/IL17A/FOXP3/IL36RN/LBP/NLRP10/EREG/IL36A/IL37	14
BP	GO:0032675	regulation of interleukin-6 production	14/800	0.0153576	0.098077	HLA-B/IFNG/INAVA/CD74/NOD2/TNFSF4/IL17A/FOXP3/IL36RN/LBP/NLRP10/EREG/IL36A/IL37	14
BP	GO:0045920	negative regulation of exocytosis	5/800	0.0155138	0.0987783	FCGR2B/SPI1/CCR2/ADRA2A/CEACAM1	5
BP	GO:0048048	embryonic eye morphogenesis	5/800	0.0155138	0.0987783	STRA6/TH/WNT16/ALDH1A3/MFAP5	5
BP	GO:0070588	calcium ion transmembrane transport	22/800	0.0155314	0.0987783	SLN/MCUB/CACNG6/CCL19/ANXA2/NPSR1/NTSR1/ADRA2A/CXCL9/JSRP1/HTR2A/CATSPER1/CXCL10/TRPM8/NALCN/JPH3/SLC24A2/CXCL11/STAC/P2RY6/CACNG1/CACNG4	22
BP	GO:0033628	regulation of cell adhesion mediated by integrin	6/800	0.0156083	0.0989954	TGFB2/DPP4/CXCL13/PLAU/SFRP2/MUC1	6
BP	GO:0048146	positive regulation of fibroblast proliferation	6/800	0.0156083	0.0989954	FGF10/CD74/S100A6/WNT2/FN1/EREG	6
BP	GO:0022612	gland morphogenesis	11/800	0.015858	0.099235	TGFB2/FGF10/PGR/FOXA1/SERPINB5/CEACAM1/TNC/SEMA3C/TGM2/ELF3/CCL11	11
BP	GO:0002430	complement receptor mediated signaling pathway	3/800	0.0159462	0.099235	FPR3/GPR33/FPR2	3
BP	GO:0003334	keratinocyte development	3/800	0.0159462	0.099235	CDSN/ABCA12/SFN	3
BP	GO:0010771	negative regulation of cell morphogenesis involved in differentiation	3/800	0.0159462	0.099235	FBLN1/TACSTD2/EFNA5	3
BP	GO:0055062	phosphate ion homeostasis	3/800	0.0159462	0.099235	SFRP4/SLC34A2/PTH	3
BP	GO:0061029	eyelid development in camera-type eye	3/800	0.0159462	0.099235	STRA6/GRHL3/INHBA	3
BP	GO:0070486	leukocyte aggregation	3/800	0.0159462	0.099235	RAC2/S100A8/S100A9	3
BP	GO:0072506	trivalent inorganic anion homeostasis	3/800	0.0159462	0.099235	SFRP4/SLC34A2/PTH	3
BP	GO:0072683	T cell extravasation	3/800	0.0159462	0.099235	CCR2/ICAM1/XG	3
BP	GO:0090177	establishment of planar polarity involved in neural tube closure	3/800	0.0159462	0.099235	GRHL3/CTHRC1/SFRP2	3
BP	GO:1900025	negative regulation of substrate adhesion-dependent cell spreading	3/800	0.0159462	0.099235	FBLN1/TACSTD2/EFNA5	3
BP	GO:1900426	positive regulation of defense response to bacterium	3/800	0.0159462	0.099235	KLK7/NOD2/NLRP10	3
BP	GO:1900452	regulation of long-term synaptic depression	3/800	0.0159462	0.099235	CBLN1/ADCY8/SORCS3	3
BP	GO:1904889	regulation of excitatory synapse assembly	3/800	0.0159462	0.099235	NPTX1/CBLN1/WNT7A	3
BP	GO:1903169	regulation of calcium ion transmembrane transport	13/800	0.0159754	0.0992833	SLN/CACNG6/NPSR1/NTSR1/ADRA2A/CXCL9/JSRP1/CXCL10/JPH3/CXCL11/STAC/P2RY6/CACNG1	13
CC	GO:0009897	external side of plasma membrane	69/828	1.51159e-20	6.71145e-18	FCGR2B/CLEC2B/IL12B/CD274/CTSK/IL2RA/ITGAM/CLEC4G/CCR2/CCR6/CRLF1/NT5E/ITGA3/CLEC10A/AMOT/ITGB2/CLEC4F/CD2/ICAM1/SPN/EFNA5/OSMR/CD3D/IL31RA/LAG3/CXCL9/CTLA4/IL2RG/CLEC4D/CD74/RAET1L/CD80/FGG/CLEC4C/CXCL10/TRPM8/ITGA11/ITGB6/SLAMF7/ANPEP/HLA-DRB1/PDCD1LG2/FGB/CLEC6A/IL17A/CD79A/PCSK9/TNFRSF9/EBI3/LDLR/CRLF2/TNFRSF18/LY6G6C/IL1RL1/SLAMF9/CCR8/CCR9/ITGA2/FCN1/IGLL1/CD1C/CD207/CD1E/WNT2/CD1B/CD1A/IGL…	69
CC	GO:0062023	collagen-containing extracellular matrix	66/828	4.91186e-20	1.09043e-17	TGFB2/MATN3/PRTN3/DST/LGALS3/DCN/COL8A2/COL24A1/PTPRZ1/FBLN1/LAMB3/ANXA2/EGFL6/CBLN4/LAMC2/FGF10/ITGB4/ICAM1/EFNA5/COL5A2/COL12A1/S100A4/CTSC/CBLN1/OMD/FGG/L1CAM/FGB/COL6A3/SERPINA1/S100A6/CLC/TNC/COMP/S100A8/ASPN/TGM2/COL5A1/THBS2/GDF15/S100A10/COL6A5/MFAP5/S100A9/COL1A2/FCN1/LUM/ANXA8/SRPX2/CTHRC1/VCAN/COL3A1/GREM1/WNT2/POSTN/AMTN/LOX/ELANE/COL1A1/SPON1/SFRP2/FN1/COL10A1/SLPI/LRRC15/COL11A1	66
CC	GO:0042613	MHC class II protein complex	13/828	2.54405e-15	3.76519e-13	HLA-DMA/CD74/HLA-DOB/HLA-DPB1/HLA-DRA/HLA-DQA1/HLA-DRB1/HLA-DQB1/HLA-DPA1/HLA-DRB5/HLA-DOA/HLA-DQA2/HLA-DQB2	13
CC	GO:0042611	MHC protein complex	15/828	4.75955e-15	5.28311e-13	HLA-B/HLA-DMA/CD74/HLA-DOB/HLA-DPB1/HLA-DRA/HLA-DQA1/HLA-DRB1/HLA-DQB1/HLA-DPA1/HLA-DRB5/HLA-DOA/HLA-DQA2/HLA-DQB2/HLA-G	15
CC	GO:0045334	clathrin-coated endocytic vesicle	21/828	1.45578e-10	1.08459e-08	APOB/CD3D/SFTPA2/CTLA4/CD74/HLA-DPB1/HLA-DRA/HLA-DQA1/HLA-DRB1/HLA-DQB1/HLA-DPA1/LDLR/CFTR/HLA-DRB5/HLA-DQA2/HLA-DQB2/CD207/EREG/SYT1/SFTPB/SLC18A3	21
CC	GO:0042581	specific granule	28/828	1.46566e-10	1.08459e-08	CYBB/ADAM8/ITGAM/CLEC12A/ITGB2/CLEC5A/ANXA3/HPSE/CEACAM3/GPR84/CLEC4D/TCN1/PLAUR/OSCAR/LYZ/PLAU/OLR1/CEACAM1/FPR2/CHI3L1/ELANE/CXCL1/CEACAM8/SLPI/MCEMP1/RETN/LCN2/CD177	28
CC	GO:0005581	collagen trimer	20/828	3.44022e-10	2.18208e-08	COL8A2/COL24A1/COL5A2/COL12A1/SFTPA2/COL6A3/COLEC12/COL5A1/COL6A5/COL1A2/FCN1/MARCO/LUM/CTHRC1/COL3A1/LOX/COL1A1/COL10A1/C1QL2/COL11A1	20
CC	GO:0030669	clathrin-coated endocytic vesicle membrane	18/828	7.41799e-10	3.55595e-08	APOB/CD3D/CD74/HLA-DPB1/HLA-DRA/HLA-DQA1/HLA-DRB1/HLA-DQB1/HLA-DPA1/LDLR/CFTR/HLA-DRB5/HLA-DQA2/HLA-DQB2/CD207/EREG/SYT1/SLC18A3	18
CC	GO:0071556	integral component of lumenal side of endoplasmic reticulum membrane	12/828	8.0089e-10	3.55595e-08	HLA-B/CD74/HLA-DPB1/HLA-DRA/HLA-DQA1/HLA-DRB1/HLA-DQB1/HLA-DPA1/HLA-DRB5/HLA-DQA2/HLA-DQB2/HLA-G	12
CC	GO:0098553	lumenal side of endoplasmic reticulum membrane	12/828	8.0089e-10	3.55595e-08	HLA-B/CD74/HLA-DPB1/HLA-DRA/HLA-DQA1/HLA-DRB1/HLA-DQB1/HLA-DPA1/HLA-DRB5/HLA-DQA2/HLA-DQB2/HLA-G	12
CC	GO:0070820	tertiary granule	27/828	1.27787e-09	5.15796e-08	CYBB/ADAM8/LGALS3/ITGAM/CLEC12A/ITGB2/CLEC5A/TNFAIP6/GPR84/PRSS3/CLEC4D/CLEC4C/TCN1/OSCAR/LYZ/PLAU/OLR1/CD55/CEACAM1/ADGRE3/FPR2/PPBP/CXCL1/SERPINB10/CEACAM8/MCEMP1/CD177	27
CC	GO:0001533	cornified envelope	14/828	2.55542e-09	9.45506e-08	RPTN/CST6/PPL/SPRR2A/CDSN/PI3/DSC2/CSTA/DSC3/SPRR3/SPRR1A/IVL/SPRR2D/SPRR1B	14
CC	GO:0098576	lumenal side of membrane	12/828	1.01869e-08	3.47922e-07	HLA-B/CD74/HLA-DPB1/HLA-DRA/HLA-DQA1/HLA-DRB1/HLA-DQB1/HLA-DPA1/HLA-DRB5/HLA-DQA2/HLA-DQB2/HLA-G	12
CC	GO:0030139	endocytic vesicle	39/828	1.88578e-08	5.98063e-07	CYBB/ADAM8/RAC2/DPP4/AMOT/HLA-B/ANXA3/APOB/NCF2/CD3D/SFTPA2/CTLA4/CD74/NOD2/FFAR4/HLA-DPB1/HLA-DRA/HLA-DQA1/HLA-DRB1/COLEC12/HLA-DQB1/HLA-DPA1/LDLR/CFTR/HLA-DRB5/GNLY/HLA-DQA2/HLA-DQB2/MARCO/CD207/ELANE/CACNG4/EREG/HLA-G/SAA1/SYT1/SFTPB/WNT7A/SLC18A3	39
CC	GO:0030665	clathrin-coated vesicle membrane	20/828	3.71547e-08	1.09978e-06	SLC18A2/APOB/CD3D/CD74/HLA-DPB1/HLA-DRA/HLA-DQA1/HLA-DRB1/HLA-DQB1/HLA-DPA1/LDLR/CFTR/HLA-DRB5/HLA-DQA2/ADCY8/HLA-DQB2/CD207/EREG/SYT1/SLC18A3	20
CC	GO:0005788	endoplasmic reticulum lumen	36/828	4.5282e-08	1.25657e-06	MATN3/SCG2/PTGS2/IL12B/ARSL/ARSJ/COL8A2/PROC/COL24A1/C3/COL5A2/COL12A1/APOB/EVA1A/CTSC/FGG/PLAUR/COL6A3/PCSK9/EBI3/SERPINA1/TNC/COL5A1/COL1A2/VCAN/COL3A1/CHGB/MZB1/AMTN/COL1A1/SPON1/FN1/COL10A1/ARSI/WNT7A/COL11A1	36
CC	GO:0070821	tertiary granule membrane	16/828	4.93247e-08	1.2734e-06	CYBB/ADAM8/ITGAM/CLEC12A/ITGB2/CLEC5A/GPR84/CLEC4D/CLEC4C/PLAU/OLR1/CEACAM1/FPR2/CEACAM8/MCEMP1/CD177	16
CC	GO:0030666	endocytic vesicle membrane	27/828	5.16243e-08	1.2734e-06	CYBB/RAC2/HLA-B/ANXA3/APOB/CD3D/CD74/HLA-DPB1/HLA-DRA/HLA-DQA1/HLA-DRB1/COLEC12/HLA-DQB1/HLA-DPA1/LDLR/CFTR/HLA-DRB5/HLA-DQA2/HLA-DQB2/MARCO/CD207/CACNG4/EREG/HLA-G/SYT1/WNT7A/SLC18A3	27
CC	GO:0098636	protein complex involved in cell adhesion	12/828	1.3706e-07	3.20288e-06	ITGAM/ITGA3/ITGB2/ITGB4/ITGBL1/CTLA4/CD80/ITGA11/PLAUR/ITGB6/PLAU/ITGA2	12
CC	GO:0005583	fibrillar collagen trimer	7/828	1.54331e-07	3.26299e-06	COL5A2/COL5A1/COL1A2/LUM/COL3A1/COL1A1/COL11A1	7
CC	GO:0098643	banded collagen fibril	7/828	1.54331e-07	3.26299e-06	COL5A2/COL5A1/COL1A2/LUM/COL3A1/COL1A1/COL11A1	7
CC	GO:0035579	specific granule membrane	17/828	2.25791e-07	4.55688e-06	CYBB/ADAM8/ITGAM/CLEC12A/ITGB2/CLEC5A/CEACAM3/GPR84/CLEC4D/PLAUR/PLAU/OLR1/CEACAM1/FPR2/CEACAM8/MCEMP1/CD177	17
CC	GO:0005796	Golgi lumen	17/828	1.61357e-06	3.1149e-05	DCN/PROC/DEFB1/OMD/MMP16/MUC7/PROS1/AGRP/CGA/LUM/VCAN/MMP11/MUC16/MUC21/MUC1/KERA/WNT7A	17
CC	GO:0098644	complex of collagen trimers	8/828	1.85389e-06	3.4297e-05	COL5A2/COL5A1/COL1A2/LUM/COL3A1/COL1A1/COL10A1/COL11A1	8
CC	GO:0030136	clathrin-coated vesicle	24/828	2.03501e-06	3.61418e-05	SLC18A2/APOB/CD3D/SFTPA2/CTLA4/CD74/HLA-DPB1/HLA-DRA/HLA-DQA1/HLA-DRB1/HLA-DQB1/HLA-DPA1/LDLR/CFTR/HLA-DRB5/HLA-DQA2/ADCY8/HLA-DQB2/CD207/EREG/SYT1/SFTPB/RAB27B/SLC18A3	24
CC	GO:0030667	secretory granule membrane	32/828	3.61883e-06	5.9787e-05	CYBB/ADAM8/LGALS3/SPACA3/ITGAM/CLEC12A/ITGB2/CLEC5A/HLA-B/MME/CEACAM3/GPR84/CLEC4D/CLEC4C/PIGR/PLAUR/ANPEP/PLAU/OLR1/CD55/CEACAM1/ADGRE3/ABCA12/FPR2/AZU1/SERPINB10/CEACAM8/MCEMP1/SYT1/CEACAM6/RAB27B/CD177	32
CC	GO:0031983	vesicle lumen	33/828	3.63569e-06	5.9787e-05	TGFB2/HSPA6/PRTN3/MNDA/ANXA2/C3/HPSE/APOB/CTSC/FGG/HK3/TCN1/RNASE3/PROS1/OSCAR/LYZ/FGB/RNASE2/SERPINA1/S100A8/S100A9/FCN1/PPBP/CHI3L1/ELANE/AZU1/GRP/CXCL1/FN1/SLPI/ALOX5/RETN/LCN2	33
CC	GO:0005775	vacuolar lumen	22/828	4.45098e-06	7.05799e-05	PRTN3/DCN/CTSK/MNDA/ANXA2/NSG1/C3/HPSE/APOB/CTSC/CD74/OMD/RNASE3/LYZ/RNASE2/LUM/CD1E/VCAN/ELANE/AZU1/RETN/KERA	22
CC	GO:0030662	coated vesicle membrane	22/828	5.37256e-06	8.22558e-05	SLC18A2/HLA-B/APOB/CD3D/CD74/HLA-DPB1/HLA-DRA/HLA-DQA1/HLA-DRB1/HLA-DQB1/HLA-DPA1/LDLR/CFTR/HLA-DRB5/HLA-DQA2/ADCY8/HLA-DQB2/CD207/EREG/HLA-G/SYT1/SLC18A3	22
CC	GO:0034774	secretory granule lumen	32/828	7.00684e-06	0.000103701	TGFB2/HSPA6/PRTN3/MNDA/ANXA2/C3/HPSE/CTSC/FGG/HK3/TCN1/RNASE3/PROS1/OSCAR/LYZ/FGB/RNASE2/SERPINA1/S100A8/S100A9/FCN1/PPBP/CHI3L1/ELANE/AZU1/GRP/CXCL1/FN1/SLPI/ALOX5/RETN/LCN2	32
CC	GO:0060205	cytoplasmic vesicle lumen	32/828	8.4856e-06	0.000121536	TGFB2/HSPA6/PRTN3/MNDA/ANXA2/C3/HPSE/CTSC/FGG/HK3/TCN1/RNASE3/PROS1/OSCAR/LYZ/FGB/RNASE2/SERPINA1/S100A8/S100A9/FCN1/PPBP/CHI3L1/ELANE/AZU1/GRP/CXCL1/FN1/SLPI/ALOX5/RETN/LCN2	32
CC	GO:0030134	COPII-coated ER to Golgi transport vesicle	15/828	8.88325e-06	0.000123255	HLA-B/CTSC/CD74/HLA-DPB1/HLA-DRA/HLA-DQA1/HLA-DRB1/PCSK9/HLA-DQB1/HLA-DPA1/SERPINA1/HLA-DRB5/HLA-DQA2/HLA-DQB2/HLA-G	15
CC	GO:0012507	ER to Golgi transport vesicle membrane	12/828	9.22166e-06	0.000124073	HLA-B/CD74/HLA-DPB1/HLA-DRA/HLA-DQA1/HLA-DRB1/HLA-DQB1/HLA-DPA1/HLA-DRB5/HLA-DQA2/HLA-DQB2/HLA-G	12
CC	GO:0030135	coated vesicle	29/828	1.65801e-05	0.000216517	SLC18A2/HLA-B/APOB/CD3D/CTSC/SFTPA2/CTLA4/CD74/HLA-DPB1/HLA-DRA/HLA-DQA1/HLA-DRB1/PCSK9/HLA-DQB1/HLA-DPA1/LDLR/SERPINA1/CFTR/HLA-DRB5/HLA-DQA2/ADCY8/HLA-DQB2/CD207/EREG/HLA-G/SYT1/SFTPB/RAB27B/SLC18A3	29
CC	GO:0008305	integrin complex	8/828	3.26049e-05	0.000413617	ITGAM/ITGA3/ITGB2/ITGB4/ITGBL1/ITGA11/ITGB6/ITGA2	8
CC	GO:0030658	transport vesicle membrane	22/828	5.93807e-05	0.000732363	SYT8/SLC18A2/HLA-B/CD74/SYNGR3/HLA-DPB1/HLA-DRA/HLA-DQA1/HLA-DRB1/CEACAM1/HLA-DQB1/HLA-DPA1/LAMP5/ABCA12/HLA-DRB5/HLA-DQA2/HLA-DQB2/PTPRN/HLA-G/SYT1/RAB27B/SLC18A3	22
CC	GO:0044306	neuron projection terminus	16/828	0.000109809	0.00131771	CALB2/SLC18A2/MME/NTSR1/TH/ADRA2A/PNOC/PRSS12/ROR1/SNCG/ITGA2/PDYN/NMU/PTPRN/SYT1/SLC18A3	16
CC	GO:0005604	basement membrane	13/828	0.000176798	0.00206574	DST/COL8A2/FBLN1/LAMB3/ANXA2/EGFL6/LAMC2/ITGB4/EFNA5/COL5A1/THBS2/AMTN/FN1	13
CC	GO:0035580	specific granule lumen	10/828	0.000251662	0.00286507	HPSE/TCN1/OSCAR/LYZ/CHI3L1/ELANE/CXCL1/SLPI/RETN/LCN2	10
CC	GO:0043679	axon terminus	14/828	0.000293278	0.003142	CALB2/SLC18A2/NTSR1/TH/ADRA2A/PNOC/PRSS12/ROR1/SNCG/ITGA2/PDYN/NMU/PTPRN/SLC18A3	14
CC	GO:0032588	trans-Golgi network membrane	13/828	0.000296841	0.003142	LGR5/NSG1/CD74/HLA-DPB1/HLA-DRA/HLA-DQA1/HLA-DRB1/HLA-DQB1/HLA-DPA1/HLA-DRB5/HLA-DQA2/HLA-DQB2/FUT9	13
CC	GO:0031225	anchored component of membrane	18/828	0.000297216	0.003142	XPNPEP2/LYPD1/NT5E/CD2/EFNA5/PRSS21/CNTN1/RAET1L/NOD2/PLAUR/CD52/CD55/LY6G6C/LY6D/CEACAM8/CEACAM6/RAB27B/CD177	18
CC	GO:0150034	distal axon	24/828	0.000508664	0.00525225	PTPRO/CALB2/ITGA3/PCDH9/SLC18A2/NTSR1/TH/ADRA2A/NGEF/DCC/PNOC/L1CAM/PRSS12/GAP43/ROR1/STMN2/LAMP5/SNCG/TUBB3/ITGA2/PDYN/NMU/PTPRN/SLC18A3	24
CC	GO:0030176	integral component of endoplasmic reticulum membrane	17/828	0.0005924	0.00597786	HACD1/SCD/HLA-B/HSD11B1/CD74/HLA-DPB1/HLA-DRA/HLA-DQA1/HLA-DRB1/HLA-DQB1/HLA-DPA1/DCSTAMP/HLA-DRB5/HLA-DQA2/HLA-DQB2/DHRS9/HLA-G	17
CC	GO:1905286	serine-type peptidase complex	4/828	0.000823226	0.0081225	CFH/PLAUR/PLAU/FCN1	4
CC	GO:0005882	intermediate filament	20/828	0.00087373	0.00843339	DST/KRT5/KRTAP2-3/KRT15/PPL/KRT6B/KRT34/HLA-DRB1/KRT32/KRT80/NEFM/KRT23/KRT16/KRT79/KRT13/KRT17/INA/KRT6A/KRT19/KRT75	20
CC	GO:0101003	ficolin-1-rich granule membrane	9/828	0.00099216	0.00937275	ADAM8/LGALS3/ITGB2/CLEC4D/CLEC4C/CD55/ADGRE3/FPR2/SERPINB10	9
CC	GO:0031227	intrinsic component of endoplasmic reticulum membrane	17/828	0.00101454	0.00938445	HACD1/SCD/HLA-B/HSD11B1/CD74/HLA-DPB1/HLA-DRA/HLA-DQA1/HLA-DRB1/HLA-DQB1/HLA-DPA1/DCSTAMP/HLA-DRB5/HLA-DQA2/HLA-DQB2/DHRS9/HLA-G	17
CC	GO:0072562	blood microparticle	15/828	0.00142592	0.0129206	CFHR1/HSPA6/C1R/TMPRSS13/C1S/CPN2/C3/CFHR3/CFH/FGG/PROS1/FGB/JCHAIN/CFB/FN1	15
CC	GO:0045121	membrane raft	26/828	0.00151325	0.0134376	PRTN3/PTGS2/ITGAM/DPP4/ANXA2/ITGB2/MME/NTSR1/CD2/HCK/HPSE/ICAM1/EFNA5/CARD11/CNTN1/HTR2A/TRPM8/OLR1/CD55/BIRC3/CD79A/KCND2/S100A10/ADCY8/CD1A/CD177	26
CC	GO:0035578	azurophil granule lumen	11/828	0.00155802	0.0134907	PRTN3/MNDA/ANXA2/C3/CTSC/RNASE3/LYZ/RNASE2/ELANE/AZU1/RETN	11
CC	GO:0098857	membrane microdomain	26/828	0.00157999	0.0134907	PRTN3/PTGS2/ITGAM/DPP4/ANXA2/ITGB2/MME/NTSR1/CD2/HCK/HPSE/ICAM1/EFNA5/CARD11/CNTN1/HTR2A/TRPM8/OLR1/CD55/BIRC3/CD79A/KCND2/S100A10/ADCY8/CD1A/CD177	26
CC	GO:0001772	immunological synapse	7/828	0.00229346	0.0191951	GZMB/LGALS3/ICAM1/CARD11/HLA-DRA/HLA-DRB1/IL4I1	7
CC	GO:0019897	extrinsic component of plasma membrane	16/828	0.00233454	0.0191951	CDH17/CDH20/CNKSR2/HCK/GNA15/PCSK9/CDH6/S100A6/GNG8/STYK1/S100A10/FCN1/CDH11/STAC/WNT2/NLRP10	16
CC	GO:0045178	basal part of cell	22/828	0.00247562	0.019985	CDH17/DST/MET/ITGA3/ANXA2/TACSTD2/ITGB4/ADRA2A/ERBB3/AQP3/NOD2/VSIG1/CEACAM1/ALPK2/LDLR/NKD2/CLCA2/ITGA2/AQP9/ADCY8/FAP/P2RY6	22
CC	GO:0043202	lysosomal lumen	11/828	0.00260709	0.0206705	DCN/CTSK/NSG1/HPSE/APOB/CD74/OMD/LUM/CD1E/VCAN/KERA	11
CC	GO:0045111	intermediate filament cytoskeleton	21/828	0.00309816	0.024133	DST/KRT5/KRTAP2-3/KRT15/PPL/KRT6B/KRT34/HLA-DRB1/KRT32/S100A8/KRT80/NEFM/KRT23/KRT16/KRT79/KRT13/KRT17/INA/KRT6A/KRT19/KRT75	21
CC	GO:0030057	desmosome	5/828	0.00349465	0.0267521	PPL/PERP/CDSN/DSC2/DSC3	5
CC	GO:0034358	plasma lipoprotein particle	6/828	0.00367875	0.027082	APOBR/APOB/LDLR/SAA4/SAA1/SAA2	6
CC	GO:1990777	lipoprotein particle	6/828	0.00367875	0.027082	APOBR/APOB/LDLR/SAA4/SAA1/SAA2	6
CC	GO:0030133	transport vesicle	29/828	0.00372072	0.027082	SYT8/NPTX1/SLC18A2/HLA-B/MME/HCK/TH/CD74/SYNGR3/HLA-DPB1/HLA-DRA/HLA-DQA1/HLA-DRB1/CD55/CEACAM1/HLA-DQB1/HLA-DPA1/LAMP5/SFTA2/ABCA12/NKD2/HLA-DRB5/HLA-DQA2/HLA-DQB2/PTPRN/HLA-G/SYT1/RAB27B/SLC18A3	29
CC	GO:0043195	terminal bouton	7/828	0.00380918	0.0272786	CALB2/SLC18A2/NTSR1/TH/PRSS12/NMU/SLC18A3	7
CC	GO:0019898	extrinsic component of membrane	24/828	0.00388477	0.0273784	CDH17/SLA2/CDH20/CNKSR2/HCK/DEFB1/ANXA13/GNA15/PLAUR/PCSK9/CDH6/S100A6/GNG8/STYK1/S100A10/FCN1/CDH11/ALOX15B/STAC/WNT2/MMP27/AZU1/MUC16/NLRP10	24
CC	GO:0042599	lamellar body	4/828	0.00484893	0.0336394	KLK7/SFTPA2/ABCA12/SFTPB	4
CC	GO:0009925	basal plasma membrane	20/828	0.00507455	0.0346631	CDH17/DST/MET/ITGA3/ANXA2/TACSTD2/ITGB4/ADRA2A/ERBB3/AQP3/NOD2/VSIG1/CEACAM1/ALPK2/LDLR/NKD2/CLCA2/AQP9/ADCY8/P2RY6	20
CC	GO:0101002	ficolin-1-rich granule	16/828	0.00536474	0.035594	HSPA6/ADAM8/LGALS3/MNDA/ITGB2/TNFAIP6/CLEC4D/CLEC4C/HK3/CD55/ADGRE3/SERPINA1/FCN1/FPR2/SERPINB10/ALOX5	16
CC	GO:0060076	excitatory synapse	7/828	0.00537117	0.035594	CALB2/ITGA3/CBLN1/SPTBN2/ADCY8/SRPX2/SYT1	7
CC	GO:0032994	protein-lipid complex	6/828	0.00553648	0.0361499	APOBR/APOB/LDLR/SAA4/SAA1/SAA2	6
CC	GO:0005766	primary lysosome	14/828	0.00611142	0.0387638	PRTN3/MNDA/ANXA2/C3/CTSC/PIGR/RNASE3/LYZ/RNASE2/ELANE/AZU1/CEACAM8/RETN/CEACAM6	14
CC	GO:0042582	azurophil granule	14/828	0.00611142	0.0387638	PRTN3/MNDA/ANXA2/C3/CTSC/PIGR/RNASE3/LYZ/RNASE2/ELANE/AZU1/CEACAM8/RETN/CEACAM6	14
CC	GO:0005765	lysosomal membrane	28/828	0.00735713	0.045369	DPP4/ANXA2/HPSE/EVA1A/HLA-DMA/CD74/HLA-DOB/FFAR4/HLA-DPB1/PIGR/HLA-DRA/HLA-DQA1/ANPEP/HLA-DRB1/PCSK9/HLA-DQB1/HLA-DPA1/LAMP5/LDLR/CFTR/HLA-DRB5/HLA-DOA/HLA-DQA2/HLA-DQB2/CD1B/AZU1/CEACAM8/CEACAM6	28
CC	GO:0098852	lytic vacuole membrane	28/828	0.00735713	0.045369	DPP4/ANXA2/HPSE/EVA1A/HLA-DMA/CD74/HLA-DOB/FFAR4/HLA-DPB1/PIGR/HLA-DRA/HLA-DQA1/ANPEP/HLA-DRB1/PCSK9/HLA-DQB1/HLA-DPA1/LAMP5/LDLR/CFTR/HLA-DRB5/HLA-DOA/HLA-DQA2/HLA-DQB2/CD1B/AZU1/CEACAM8/CEACAM6	28
CC	GO:1904724	tertiary granule lumen	7/828	0.00814455	0.0495367	TNFAIP6/PRSS3/TCN1/OSCAR/LYZ/PPBP/CXCL1	7
CC	GO:1904090	peptidase inhibitor complex	3/828	0.00961731	0.0569345	PLAU/CSTA/KLK8	3
CC	GO:1990454	L-type voltage-gated calcium channel complex	3/828	0.00961731	0.0569345	CACNG6/CACNG1/CACNG4	3
CC	GO:0005911	cell-cell junction	32/828	0.0122877	0.0707279	CLDN14/CDH20/CALB2/DPP4/ANXA2/PCDH9/AMOT/PTPRU/CD2/EFNA5/PPL/JAML/AQP3/CLDN16/PERP/PDLIM4/SCN1A/CDSN/CEACAM1/SPTBN2/NECTIN4/CDH6/CLDN10/DSC2/CDH11/ALOX15B/DSC3/NRAP/AMTN/STEAP1/FRMD5/MYH2	32
CC	GO:0034362	low-density lipoprotein particle	3/828	0.0124252	0.0707279	APOBR/APOB/LDLR	3
CC	GO:0060198	clathrin-sculpted vesicle	3/828	0.0124252	0.0707279	SLC18A2/SYT1/SLC18A3	3
CC	GO:0031904	endosome lumen	5/828	0.0150966	0.0848468	IL12B/CTSK/APOB/PDLIM4/SFTPB	5
CC	GO:0005771	multivesicular body	7/828	0.0166431	0.092369	CST7/NSG1/SFTPA2/CD74/CD79A/SFTPB/RAB27B	7
CC	GO:0005770	late endosome	20/828	0.0175658	0.0962866	SLA2/NTRK1/CST7/IL12B/ANXA2/NSG1/HLA-DMA/SFTPA2/CD74/HLA-DRA/HLA-DRB1/CD79A/PCSK9/LAMP5/LDLR/HLA-DRB5/ANXA8/CD1E/SFTPB/RAB27B	20
MF	GO:0005125	cytokine activity	64/815	5.72242e-33	4.17737e-30	TGFB2/CKLF/SCG2/IL12B/XCL2/OSM/WNT10A/CXCL14/IL18/CXCL3/CRLF1/CCL19/IL32/CCL24/WNT16/CXCL13/SECTM1/IFNG/CXCL9/IFNL1/SLURP1/CXCL6/IL2/CXCL10/VSTM1/IFNL2/IL11/IL17C/IL26/CCL23/TNFSF4/TNFSF11/IL17A/EBI3/CXCL8/LTA/GDF15/TNFSF9/IL1F10/CXCL11/INHBA/IL36RN/IFNL3/CSF2/IL36G/CCL13/IL1RN/PPBP/LTB/GREM1/CD70/WNT2/CCL1/CCL22/CXCL1/TNFSF18/CCL11/CCL7/CXCL5/CCL20/CCL17/WNT7A/IL36A/IL37	64
MF	GO:0048018	receptor ligand activity	87/815	1.88038e-29	6.8634e-27	TGFB2/CKLF/SCG2/IL12B/LGALS3/XCL2/C1QTNF12/OSM/UTS2/WNT10A/CXCL14/IL18/CXCL3/CRLF1/CCL19/DPP4/IL32/FGF10/CCL24/WNT16/EFNA5/CXCL13/SECTM1/IFNG/CXCL9/IFNL1/SLURP1/CXCL6/IL2/CXCL10/VSTM1/IFNL2/IL11/IL17C/PNOC/UCN2/IL26/CCL23/TNFSF4/MACC1/TNFSF11/AGRP/IL17A/NBL1/CGA/EBI3/INSL3/SEMA3C/PMCH/CXCL8/LTA/GDF15/TNFSF9/IL1F10/CXCL11/INHBA/IL36RN/IFNL3/GPNMB/CSF2/IL36G/PDYN/CCL13/IL1RN/PPBP/LTB/CHGB/GREM1/CD7…	87
MF	GO:0030546	signaling receptor activator activity	87/815	5.49862e-29	1.338e-26	TGFB2/CKLF/SCG2/IL12B/LGALS3/XCL2/C1QTNF12/OSM/UTS2/WNT10A/CXCL14/IL18/CXCL3/CRLF1/CCL19/DPP4/IL32/FGF10/CCL24/WNT16/EFNA5/CXCL13/SECTM1/IFNG/CXCL9/IFNL1/SLURP1/CXCL6/IL2/CXCL10/VSTM1/IFNL2/IL11/IL17C/PNOC/UCN2/IL26/CCL23/TNFSF4/MACC1/TNFSF11/AGRP/IL17A/NBL1/CGA/EBI3/INSL3/SEMA3C/PMCH/CXCL8/LTA/GDF15/TNFSF9/IL1F10/CXCL11/INHBA/IL36RN/IFNL3/GPNMB/CSF2/IL36G/PDYN/CCL13/IL1RN/PPBP/LTB/CHGB/GREM1/CD7…	87
MF	GO:0005126	cytokine receptor binding	56/815	2.03793e-22	3.71921e-20	TGFB2/NTRK1/CKLF/IL12B/XCL2/OSM/CXCL14/IL18/CXCL3/CCR2/CRLF1/CCL19/CCL24/EFNA5/CXCL13/OSMR/CD300LF/DEFB1/IFNG/CXCL9/IFNL1/CXCL6/IL2/CXCL10/IL11/CCL23/TNFSF4/TNFSF11/EBI3/TGFBR3L/CRLF2/CXCL8/LTA/TNFSF9/IL1F10/CXCL11/IL36RN/CSF2/IL36G/CCL13/IL1RN/PPBP/LTB/GREM1/CD70/CCL1/CCL22/CXCL1/TNFSF18/CCL11/CCL7/CXCL5/CCL20/CCL17/IL36A/IL37	56
MF	GO:0008009	chemokine activity	23/815	1.04815e-18	1.53029e-16	CKLF/XCL2/CXCL14/CXCL3/CCL19/CCL24/CXCL13/CXCL9/CXCL6/CXCL10/CCL23/CXCL8/CXCL11/CCL13/PPBP/CCL1/CCL22/CXCL1/CCL11/CCL7/CXCL5/CCL20/CCL17	23
MF	GO:0042379	chemokine receptor binding	25/815	1.4255e-16	1.73436e-14	CKLF/XCL2/CXCL14/CXCL3/CCR2/CCL19/CCL24/CXCL13/DEFB1/CXCL9/CXCL6/CXCL10/CCL23/CXCL8/CXCL11/CCL13/PPBP/CCL1/CCL22/CXCL1/CCL11/CCL7/CXCL5/CCL20/CCL17	25
MF	GO:0004252	serine-type endopeptidase activity	36/815	6.35987e-15	6.63243e-13	TMPRSS2/PRTN3/ADAM8/GZMB/C1R/CTSK/PROC/TMPRSS13/C1S/DPP4/PRSS21/CTSC/C2/PRSS3/KLK7/KLK10/MMP12/PRSS12/PLAU/PCSK9/CORIN/CFB/KLK8/TMPRSS11F/TMPRSS4/KLK1/FAP/MMP10/MMP11/ELANE/AZU1/TMPRSS6/MMP3/TMPRSS11E/MMP7/MMP13	36
MF	GO:0001664	G protein-coupled receptor binding	47/815	7.32282e-15	6.68207e-13	CKLF/XCL2/GRM5/WNT10A/CXCL14/CXCL3/CCR2/CCL19/C3/CCL24/ITGB4/WNT16/CXCL13/ADRA2A/DEFB1/CXCL9/CXCL6/IL2/CXCL10/PNOC/GNA15/UCN2/CCL23/AGRP/INSL3/PMCH/CXCL8/CXCL11/FCN1/PDYN/CCL13/MARCO/NMU/PPBP/CTHRC1/WNT2/CCL1/CCL22/CXCL1/CCL11/CCL7/CXCL5/PTH/CCL20/CCL17/SAA1/WNT7A	47
MF	GO:0004866	endopeptidase inhibitor activity	35/815	1.07664e-13	8.73276e-12	CST7/SPINK7/SPOCK3/TFPI2/RARRES1/ANXA2/SPINK2/C3/CST6/SERPINB4/SERPINA6/NLRP7/SERPINA9/SERPINB5/CARD17/SPOCK2/PROS1/PI3/COL6A3/OPRPN/BIRC3/SERPINA1/CSTA/SERPINA12/SERPINB7/WFDC10B/CST5/BIRC7/SERPINB10/SERPINB2/SERPINA11/SLPI/CST4/CST1/CST2	35
MF	GO:0008236	serine-type peptidase activity	36/815	1.2896e-13	9.41408e-12	TMPRSS2/PRTN3/ADAM8/GZMB/C1R/CTSK/PROC/TMPRSS13/C1S/DPP4/PRSS21/CTSC/C2/PRSS3/KLK7/KLK10/MMP12/PRSS12/PLAU/PCSK9/CORIN/CFB/KLK8/TMPRSS11F/TMPRSS4/KLK1/FAP/MMP10/MMP11/ELANE/AZU1/TMPRSS6/MMP3/TMPRSS11E/MMP7/MMP13	36
MF	GO:0005201	extracellular matrix structural constituent	34/815	1.47067e-13	9.75991e-12	MATN3/DCN/ZPLD1/COL8A2/COL24A1/TFPI2/FBLN1/LAMB3/LAMC2/COL5A2/COL12A1/FGG/FGB/COL6A3/TNC/COMP/ASPN/COL5A1/THBS2/COL6A5/MFAP5/COL1A2/LUM/SRPX2/CTHRC1/VCAN/COL3A1/POSTN/CHI3L1/COL1A1/SPON1/FN1/COL10A1/COL11A1	34
MF	GO:0061135	endopeptidase regulator activity	36/815	2.11067e-13	1.28399e-11	CST7/SPINK7/SPOCK3/TFPI2/RARRES1/ANXA2/SPINK2/C3/CST6/SERPINB4/SERPINA6/NLRP7/SERPINA9/SERPINB5/CARD17/SPOCK2/PROS1/PI3/COL6A3/OPRPN/BIRC3/SERPINA1/CSTA/SERPINA12/SERPINB7/WFDC10B/CST5/BIRC7/SFRP2/SERPINB10/SERPINB2/SERPINA11/SLPI/CST4/CST1/CST2	36
MF	GO:0017171	serine hydrolase activity	36/815	2.48153e-13	1.39347e-11	TMPRSS2/PRTN3/ADAM8/GZMB/C1R/CTSK/PROC/TMPRSS13/C1S/DPP4/PRSS21/CTSC/C2/PRSS3/KLK7/KLK10/MMP12/PRSS12/PLAU/PCSK9/CORIN/CFB/KLK8/TMPRSS11F/TMPRSS4/KLK1/FAP/MMP10/MMP11/ELANE/AZU1/TMPRSS6/MMP3/TMPRSS11E/MMP7/MMP13	36
MF	GO:0030414	peptidase inhibitor activity	35/815	3.50925e-13	1.82982e-11	CST7/SPINK7/SPOCK3/TFPI2/RARRES1/ANXA2/SPINK2/C3/CST6/SERPINB4/SERPINA6/NLRP7/SERPINA9/SERPINB5/CARD17/SPOCK2/PROS1/PI3/COL6A3/OPRPN/BIRC3/SERPINA1/CSTA/SERPINA12/SERPINB7/WFDC10B/CST5/BIRC7/SERPINB10/SERPINB2/SERPINA11/SLPI/CST4/CST1/CST2	35
MF	GO:0061134	peptidase regulator activity	39/815	4.28093e-13	2.08339e-11	CST7/SPINK7/SPOCK3/TFPI2/FBLN1/RARRES1/ANXA2/SPINK2/C3/CST6/SERPINB4/SERPINA6/CTSC/NLRP7/SERPINA9/SERPINB5/CARD17/SPOCK2/PROS1/PI3/COL6A3/OPRPN/BIRC3/SERPINA1/CSTA/SERPINA12/SERPINB7/WFDC10B/CST5/BIRC7/SFRP2/FN1/SERPINB10/SERPINB2/SERPINA11/SLPI/CST4/CST1/CST2	39
MF	GO:0140375	immune receptor activity	30/815	2.03504e-12	9.28489e-11	FCGR2B/IL1RAPL2/IL12B/IL2RA/FPR3/CCR2/CCR6/CRLF1/OSMR/IL31RA/IL2RG/GPR33/CD74/HLA-DOB/PIGR/HLA-DRA/HLA-DQA1/HLA-DRB1/HLA-DQB1/HLA-DPA1/EBI3/CRLF2/IL1RL1/CCR8/CCR9/HLA-DOA/HLA-DQA2/FPR2/HLA-DQB2/IL22RA2	30
MF	GO:0032395	MHC class II receptor activity	9/815	6.01265e-12	2.5819e-10	HLA-DOB/HLA-DRA/HLA-DQA1/HLA-DRB1/HLA-DQB1/HLA-DPA1/HLA-DOA/HLA-DQA2/HLA-DQB2	9
MF	GO:0005178	integrin binding	30/815	8.3796e-12	3.39839e-10	CDH17/DST/PTPRZ1/ITGAM/FBLN1/ITGA3/ISG15/EGFL6/ITGB2/LGALS12/ITGB4/ICAM1/JAML/ITGBL1/IBSP/LCP1/ITGA11/ITGB6/COMP/COL5A1/GPNMB/ITGA2/CCN4/CCN5/COL3A1/FAP/SFRP2/FN1/FRMD5/CD177	30
MF	GO:0023026	MHC class II protein complex binding	13/815	2.57481e-11	9.89268e-10	HLA-DMA/CD74/HLA-DOB/HLA-DPB1/HLA-DRA/HLA-DQA1/HLA-DRB1/HLA-DQB1/HLA-DPA1/HLA-DRB5/HLA-DOA/HLA-DQA2/HLA-DQB2	13
MF	GO:0045236	CXCR chemokine receptor binding	10/815	8.67416e-10	3.16607e-08	CXCL3/CXCL13/CXCL9/CXCL6/CXCL10/CXCL8/CXCL11/PPBP/CXCL1/CXCL5	10
MF	GO:0023023	MHC protein complex binding	13/815	2.04747e-09	7.11741e-08	HLA-DMA/CD74/HLA-DOB/HLA-DPB1/HLA-DRA/HLA-DQA1/HLA-DRB1/HLA-DQB1/HLA-DPA1/HLA-DRB5/HLA-DOA/HLA-DQA2/HLA-DQB2	13
MF	GO:0019955	cytokine binding	25/815	2.70463e-09	8.97444e-08	IL12B/IL2RA/CCR2/CCR6/CRLF1/BMPR1B/OSMR/IL31RA/IL2RG/NLRP7/CD74/NBL1/TNFRSF9/EBI3/TGFBR3L/COMP/CRLF2/IL1RL1/CCR8/CCR9/IL36RN/IL1RN/GREM1/ELANE/IL22RA2	25
MF	GO:0005539	glycosaminoglycan binding	33/815	3.80597e-09	1.20798e-07	SPOCK3/DCN/ADAMTSL5/LAMC2/FGF10/TNFAIP6/CXCL13/APOB/CFH/CXCL6/NOD2/SPOCK2/CXCL10/CCL23/JCHAIN/TGFBR3L/COMP/CXCL8/COL5A1/THBS2/CXCL11/GPNMB/CCN4/VCAN/CCN5/POSTN/ELANE/AZU1/CCL7/FN1/SAA1/COL11A1/EPYC	33
MF	GO:0004175	endopeptidase activity	48/815	4.45506e-09	1.35508e-07	TMPRSS2/PRTN3/ADAM8/GZMB/PYDC1/C1R/CTSK/PROC/TMPRSS13/C1S/PSMB9/DPP4/MME/PRSS21/CTSC/C2/PRSS3/KLK7/MMP16/KLK10/MMP12/PRSS12/PLAU/PCSK9/CTSE/CLC/CORIN/CFB/CLCA2/KLK8/TMPRSS11F/TMPRSS4/KLK1/FAP/MMP10/MMP11/MMP27/ELANE/AZU1/TMPRSS6/CAPN8/ADAMTS14/ADAM12/MMP3/MMP20/TMPRSS11E/MMP7/MMP13	48
MF	GO:0048020	CCR chemokine receptor binding	14/815	8.69474e-09	2.53887e-07	XCL2/CCR2/CCL19/CCL24/CXCL13/DEFB1/CCL23/CCL13/CCL1/CCL22/CCL11/CCL7/CCL20/CCL17	14
MF	GO:0004857	enzyme inhibitor activity	44/815	1.25269e-08	3.51718e-07	CST7/SPINK7/LGALS3/SPOCK3/SLN/TFPI2/ELFN2/RARRES1/ANXA2/ANXA3/SPINK2/C3/CST6/SERPINB4/SERPINA6/CDKN2B/NLRP7/SERPINA9/SERPINB5/CARD17/SPOCK2/PKIB/PROS1/PI3/COL6A3/OPRPN/BIRC3/SERPINA1/CSTA/SERPINA12/PHACTR3/SERPINB7/WFDC10B/CDKN2A/CST5/BIRC7/SERPINB10/SFN/SERPINB2/SERPINA11/SLPI/CST4/CST1/CST2	44
MF	GO:0030020	extracellular matrix structural constituent conferring tensile strength	12/815	1.26087e-07	3.40901e-06	COL8A2/COL24A1/COL5A2/COL12A1/COL6A3/COL5A1/COL6A5/COL1A2/COL3A1/COL1A1/COL10A1/COL11A1	12
MF	GO:0004867	serine-type endopeptidase inhibitor activity	18/815	2.58823e-07	6.54924e-06	SPINK7/TFPI2/ANXA2/SPINK2/SERPINB4/SERPINA6/SERPINA9/SERPINB5/PI3/COL6A3/SERPINA1/SERPINA12/SERPINB7/WFDC10B/SERPINB10/SERPINB2/SERPINA11/SLPI	18
MF	GO:0043394	proteoglycan binding	11/815	2.60175e-07	6.54924e-06	CTSK/FST/HPSE/CFH/TNC/COMP/COL5A1/GPNMB/ITGA2/AZU1/FN1	11
MF	GO:0008201	heparin binding	24/815	3.96152e-07	9.6397e-06	ADAMTSL5/LAMC2/FGF10/CXCL13/APOB/CFH/CXCL6/CXCL10/CCL23/COMP/CXCL8/COL5A1/THBS2/CXCL11/GPNMB/CCN4/CCN5/POSTN/ELANE/AZU1/CCL7/FN1/SAA1/COL11A1	24
MF	GO:0042277	peptide binding	35/815	9.40359e-07	2.21439e-05	FCGR2B/TGFB2/ITGAM/ITGB2/HLA-B/MME/MC4R/MRGPRX2/CD74/TMEM158/NOD2/HLA-DPB1/MCHR1/HLA-DRA/HLA-DQA1/ANPEP/HLA-DRB1/PTGES/HLA-DQB1/NPY2R/HLA-DPA1/EBI3/LDLR/CCKAR/INHBA/HLA-DRB5/ITGA2/FPR2/MARCO/CD1C/LBP/CD1E/CD1B/CD1A/HLA-G	35
MF	GO:0030246	carbohydrate binding	31/815	1.2263e-06	2.79751e-05	CHI3L2/CLEC2B/LGALS3/CLEC4G/SIGLEC12/CLEC10A/CLEC12A/CLEC5A/LGALS12/CLEC4F/CNTN1/SFTPA2/CLEC4D/IL2/CLEC3A/MRC1/CLEC4C/HK3/GALNT13/HLA-DRA/HLA-DRB1/CLEC6A/OLR1/COLEC12/CLC/CRYBG2/GALNT5/FCN1/CD207/VCAN/CHI3L1	31
MF	GO:0004896	cytokine receptor activity	16/815	5.17639e-06	0.000114508	IL1RAPL2/IL12B/IL2RA/CCR2/CCR6/CRLF1/OSMR/IL31RA/IL2RG/CD74/EBI3/CRLF2/IL1RL1/CCR8/CCR9/IL22RA2	16
MF	GO:0005518	collagen binding	13/815	7.48108e-06	0.000160623	DCN/CTSK/ITGA3/ITGA11/MMP12/COMP/ASPN/ITGA2/LUM/LOX/FN1/LRRC15/MMP13	13
MF	GO:0038024	cargo receptor activity	14/815	8.48542e-06	0.000176982	TMPRSS2/ITGAM/TMPRSS13/APOBR/ITGB2/MEGF10/MRC1/PRSS12/OLR1/COLEC12/LDLR/FPR2/MARCO/TMPRSS4	14
MF	GO:0002020	protease binding	19/815	8.78328e-06	0.000178105	ITGA3/DPP4/ANXA2/SERPINB4/NLRP7/CARD17/LDLR/SERPINA1/CSTA/INSL3/COMP/COL1A2/COL3A1/FAP/CD70/ELANE/COL1A1/FN1/CD177	19
MF	GO:0019838	growth factor binding	19/815	1.20928e-05	0.000238588	NTRK1/IL2RA/ITGB4/CXCL13/ERBB3/OSMR/IL2RG/NLRP7/TGFBR3L/NKD2/COL5A1/IL36RN/COL1A2/IL1RN/SRPX2/CCN4/CCN5/COL3A1/COL1A1	19
MF	GO:1901681	sulfur compound binding	28/815	2.20199e-05	0.000416835	FST/ADAMTSL5/LAMC2/FGF10/CXCL13/APOB/CFH/CXCL6/CXCL10/ACBD7/CCL23/PTGES/COMP/CXCL8/COL5A1/THBS2/CXCL11/GPNMB/ITGA2/CCN4/CCN5/POSTN/ELANE/AZU1/CCL7/FN1/SAA1/COL11A1	28
MF	GO:0033218	amide binding	37/815	2.22693e-05	0.000416835	FCGR2B/TGFB2/ITGAM/ITGB2/HLA-B/MME/MC4R/MRGPRX2/CD300LF/CD74/TMEM158/NOD2/HLA-DPB1/ACBD7/MCHR1/HLA-DRA/HLA-DQA1/ANPEP/HLA-DRB1/PTGES/HLA-DQB1/NPY2R/HLA-DPA1/EBI3/LDLR/CCKAR/INHBA/HLA-DRB5/ITGA2/FPR2/MARCO/CD1C/LBP/CD1E/CD1B/CD1A/HLA-G	37
MF	GO:0042605	peptide antigen binding	9/815	2.54041e-05	0.000463625	HLA-B/HLA-DPB1/HLA-DRA/HLA-DQA1/HLA-DRB1/HLA-DQB1/HLA-DPA1/HLA-DRB5/HLA-G	9
MF	GO:0001618	virus receptor activity	13/815	2.62747e-05	0.000467818	CLEC4G/DPP4/CLEC5A/ICAM1/CD80/HTR2A/MRC1/ITGB6/ANPEP/CD55/NECTIN4/LDLR/ITGA2	13
MF	GO:0004222	metalloendopeptidase activity	16/815	2.98818e-05	0.000515221	ADAM8/MME/KLK7/MMP16/MMP12/CLCA2/MMP10/MMP11/MMP27/TMPRSS6/ADAMTS14/ADAM12/MMP3/MMP20/MMP7/MMP13	16
MF	GO:0140272	exogenous protein binding	13/815	3.03486e-05	0.000515221	CLEC4G/DPP4/CLEC5A/ICAM1/CD80/HTR2A/MRC1/ITGB6/ANPEP/CD55/NECTIN4/LDLR/ITGA2	13
MF	GO:0071723	lipopeptide binding	5/815	3.51443e-05	0.000583076	CD1C/LBP/CD1E/CD1B/CD1A	5
MF	GO:0005149	interleukin-1 receptor binding	6/815	6.00905e-05	0.000974801	IL1F10/IL36RN/IL36G/IL1RN/IL36A/IL37	6
MF	GO:0004869	cysteine-type endopeptidase inhibitor activity	10/815	0.000153066	0.00242909	CST7/CST6/CARD17/BIRC3/CSTA/CST5/BIRC7/CST4/CST1/CST2	10
MF	GO:0030280	structural constituent of skin epidermis	8/815	0.000175361	0.00272369	KRT5/KRT6B/PI3/KRT80/KRT79/KRT6A/SPRR1A/KRT75	8
MF	GO:0017147	Wnt-protein binding	7/815	0.000270484	0.00411361	PTPRO/ROR1/SFRP5/SFRP4/CTHRC1/APCDD1L/SFRP2	7
MF	GO:0008528	G protein-coupled peptide receptor activity	17/815	0.000301781	0.00449593	LGR5/FPR3/CCR2/CCR6/NPSR1/NTSR1/MC4R/GPR84/F2RL2/MCHR1/NPY2R/CCKAR/CCR8/CCR9/FPR2/RXFP2/SORCS3	17
MF	GO:0048306	calcium-dependent protein binding	12/815	0.000437372	0.00638564	ANXA2/ANXA3/S100A4/STMN2/S100A6/S100A8/S100A10/S100A9/S100A2/S100B/SYT1/CD177	12
MF	GO:0001653	peptide receptor activity	17/815	0.000481707	0.00689502	LGR5/FPR3/CCR2/CCR6/NPSR1/NTSR1/MC4R/GPR84/F2RL2/MCHR1/NPY2R/CCKAR/CCR8/CCR9/FPR2/RXFP2/SORCS3	17
MF	GO:0050786	RAGE receptor binding	4/815	0.000646279	0.00907277	S100A4/S100A8/S100A9/S100B	4
MF	GO:0005200	structural constituent of cytoskeleton	13/815	0.000674756	0.0092938	KRT5/KRT15/PPL/KRT6B/HLA-DRB1/SPTBN2/NEFM/KRT16/TUBB3/INA/KRT6A/KRT19/ACTBL2	13
MF	GO:0003823	antigen binding	18/815	0.000727191	0.00983054	HLA-B/LAG3/HLA-DPB1/HLA-DRA/HLA-DQA1/HLA-DRB1/JCHAIN/HLA-DQB1/HLA-DPA1/HLA-DRB5/FCN1/IGLL1/CD1C/CD1E/CD1B/CD1A/IGLL5/HLA-G	18
MF	GO:0008237	metallopeptidase activity	19/815	0.000745588	0.00989598	ADAM8/XPNPEP2/MME/KLK7/CPA4/MMP16/MMP12/ANPEP/CLCA2/MMP10/MMP11/MMP27/TMPRSS6/ADAMTS14/ADAM12/MMP3/MMP20/MMP7/MMP13	19
MF	GO:0038187	pattern recognition receptor activity	6/815	0.000794581	0.0103579	CLEC4D/NOD2/CLEC6A/COLEC12/FCN1/MARCO	6
MF	GO:0043395	heparan sulfate proteoglycan binding	5/815	0.000888643	0.0113809	FST/CFH/COMP/ITGA2/AZU1	5
MF	GO:0048407	platelet-derived growth factor binding	4/815	0.000980107	0.0123358	COL5A1/COL1A2/COL3A1/COL1A1	4
MF	GO:1990782	protein tyrosine kinase binding	13/815	0.00147213	0.018176	CEACAM4/GRM5/CD2/CEACAM3/DOK2/CEACAM1/PSG7/PSG1/PSG4/PSG9/PSG3/PSG6/PSG8	13
MF	GO:0001848	complement binding	5/815	0.00149392	0.018176	ITGAM/ITGB2/MEGF10/CRP/CFB	5
MF	GO:0008417	fucosyltransferase activity	4/815	0.00197814	0.023291	FUT2/FUT6/FUT9/FUT3	4
MF	GO:1901338	catecholamine binding	4/815	0.00197814	0.023291	TH/ADRA2A/DRD5/ADRB3	4
MF	GO:0001968	fibronectin binding	6/815	0.00210467	0.0240064	CTSK/FBLN1/ITGA3/TNFAIP6/SFRP2/LRRC15	6
MF	GO:0005164	tumor necrosis factor receptor binding	6/815	0.00210467	0.0240064	TNFSF4/TNFSF11/LTA/TNFSF9/LTB/CD70	6
MF	GO:0005537	mannose binding	5/815	0.00235782	0.0264802	CLEC4G/CLEC4D/MRC1/CLEC6A/CD207	5
MF	GO:0005544	calcium-dependent phospholipid binding	8/815	0.00243642	0.0269483	CPNE9/SYT8/ANXA2/ANXA3/CPNE7/ANXA13/ANXA8/SYT1	8
MF	GO:0008195	phosphatidate phosphatase activity	4/815	0.00267312	0.029125	PLPPR3/PLPP4/PLPPR1/PLPPR5	4
MF	GO:0005179	hormone activity	13/815	0.00293079	0.0314629	C1QTNF12/UTS2/PNOC/UCN2/AGRP/CGA/INSL3/PMCH/INHBA/CHGB/GRP/PTH/RETN	13
MF	GO:0070851	growth factor receptor binding	14/815	0.00347278	0.036741	IL12B/FGF10/CD300LF/IL2/IL11/IL1F10/IL36RN/CSF2/IL36G/IL1RN/GREM1/EREG/IL36A/IL37	14
MF	GO:0005044	scavenger receptor activity	7/815	0.00435315	0.0453972	TMPRSS2/TMPRSS13/MEGF10/PRSS12/COLEC12/MARCO/TMPRSS4	7
MF	GO:0001846	opsonin binding	4/815	0.00452894	0.0459185	ITGAM/ITGB2/MEGF10/CRP	4
MF	GO:0042577	lipid phosphatase activity	4/815	0.00452894	0.0459185	PLPPR3/PLPP4/PLPPR1/PLPPR5	4
MF	GO:0032813	tumor necrosis factor receptor superfamily binding	7/815	0.00550986	0.0550986	TNFSF4/TNFSF11/LTA/TNFSF9/LTB/CD70/TNFSF18	7
MF	GO:0036122	BMP binding	4/815	0.00571757	0.0564031	BMPR1B/NBL1/COMP/GREM1	4
MF	GO:0030169	low-density lipoprotein particle binding	4/815	0.00709727	0.0690801	CRP/COLEC12/PCSK9/LDLR	4
MF	GO:0008239	dipeptidyl-peptidase activity	3/815	0.00821085	0.0788674	DPP4/CTSC/FAP	3
MF	GO:0001540	amyloid-beta binding	9/815	0.00944358	0.0895301	FCGR2B/TGFB2/ITGAM/ITGB2/CD74/LDLR/ITGA2/FPR2/MARCO	9
MF	GO:0050840	extracellular matrix binding	7/815	0.0103662	0.095597	LGALS3/DCN/ITGA3/SPOCK2/ITGA2/LRRC15/COL11A1	7
MF	GO:0016500	protein-hormone receptor activity	4/815	0.0104764	0.095597	LGR5/MCHR1/RXFP2/INSRR	4
MF	GO:0030296	protein tyrosine kinase activator activity	4/815	0.0104764	0.095597	GRM5/EFNA5/ERBB3/GREM1	4
KEGG	hsa04060	Cytokine-cytokine receptor interaction	69/428	1.72805e-27	4.80399e-25	TNFRSF13B/TGFB2/IL12B/XCL2/OSM/IL2RA/CXCL14/IL18/CXCL3/CCR2/CCR6/CCL19/IL32/BMPR1B/CCL24/CXCL13/OSMR/IL31RA/IFNG/CXCL9/IL2RG/IFNL1/CXCL6/IL2/CXCL10/IFNL2/IL11/IL17C/TNFRSF17/IL26/CCL23/TNFSF4/TNFSF11/IL17A/TNFRSF9/EBI3/CRLF2/TNFRSF18/CXCL8/LTA/GDF15/IL1RL1/TNFSF9/IL1F10/CXCL11/INHBA/CCR8/CCR9/IL36RN/IFNL3/CSF2/IL36G/CCL13/IL1RN/PPBP/LTB/CD70/CCL1/CCL22/CXCL1/TNFSF18/CCL11/CCL7/CXCL5/CCL20/CCL17/C…	69
KEGG	hsa05150	Staphylococcus aureus infection	33/428	4.56012e-19	6.33857e-17	FCGR2B/C1R/FPR3/ITGAM/C1S/ITGB2/C3/ICAM1/KRT15/DEFB1/C2/HLA-DMA/KRT34/CFH/HLA-DOB/FGG/HLA-DPB1/HLA-DRA/HLA-DQA1/HLA-DRB1/HLA-DQB1/HLA-DPA1/KRT32/KRT23/KRT16/HLA-DRB5/CFB/HLA-DOA/HLA-DQA2/KRT13/FPR2/KRT17/KRT19	33
KEGG	hsa05323	Rheumatoid arthritis	32/428	1.54494e-18	1.43165e-16	TGFB2/CTSK/IL18/CXCL3/ITGB2/ICAM1/IFNG/HLA-DMA/CTLA4/CXCL6/HLA-DOB/CD80/HLA-DPB1/IL11/HLA-DRA/HLA-DQA1/HLA-DRB1/TNFSF11/IL17A/HLA-DQB1/HLA-DPA1/CXCL8/HLA-DRB5/HLA-DOA/CSF2/HLA-DQA2/LTB/CXCL1/CXCL5/PTH/MMP3/CCL20	32
KEGG	hsa04061	Viral protein interaction with cytokine and cytokine receptor	32/428	1.81549e-17	1.26177e-15	XCL2/IL2RA/CXCL14/IL18/CXCL3/CCR2/CCR6/CCL19/CCL24/CXCL13/CXCL9/IL2RG/CXCL6/IL2/CXCL10/CCL23/CXCL8/LTA/CXCL11/CCR8/CCR9/CCL13/PPBP/CCL1/CCL22/CXCL1/CCL11/CCL7/CXCL5/CCL20/CCL17/IL37	32
KEGG	hsa04940	Type I diabetes mellitus	20/428	5.00422e-15	2.78235e-13	GZMB/IL12B/HLA-B/IFNG/HLA-DMA/IL2/HLA-DOB/CD80/HLA-DPB1/HLA-DRA/HLA-DQA1/HLA-DRB1/HLA-DQB1/HLA-DPA1/LTA/HLA-DRB5/HLA-DOA/HLA-DQA2/PTPRN/HLA-G	20
KEGG	hsa04640	Hematopoietic cell lineage	29/428	8.55454e-15	3.96361e-13	CR1L/IL2RA/ITGAM/ITGA3/MME/CD7/CD2/CD3D/HLA-DMA/HLA-DOB/HLA-DPB1/IL11/HLA-DRA/HLA-DQA1/ANPEP/HLA-DRB1/CD55/HLA-DQB1/HLA-DPA1/CD8B2/HLA-DRB5/HLA-DOA/CSF2/ITGA2/HLA-DQA2/CD1C/CD1E/CD1B/CD1A	29
KEGG	hsa05330	Allograft rejection	18/428	8.02178e-14	3.18579e-12	GZMB/IL12B/HLA-B/IFNG/HLA-DMA/IL2/HLA-DOB/CD80/HLA-DPB1/HLA-DRA/HLA-DQA1/HLA-DRB1/HLA-DQB1/HLA-DPA1/HLA-DRB5/HLA-DOA/HLA-DQA2/HLA-G	18
KEGG	hsa04514	Cell adhesion molecules	33/428	3.6578e-12	1.27108e-10	CLDN14/CD274/ICOS/ITGAM/ITGB2/HLA-B/CD2/ICAM1/SPN/TIGIT/HLA-DMA/CNTN1/CLDN16/CTLA4/HLA-DOB/CD80/HLA-DPB1/NCAM2/L1CAM/HLA-DRA/HLA-DQA1/HLA-DRB1/PDCD1LG2/HLA-DQB1/HLA-DPA1/CLDN10/CD8B2/HLA-DRB5/HLA-DOA/HLA-DQA2/VCAN/HLA-G/VTCN1	33
KEGG	hsa05332	Graft-versus-host disease	17/428	9.45914e-12	2.92182e-10	GZMB/HLA-B/IFNG/HLA-DMA/IL2/HLA-DOB/CD80/HLA-DPB1/HLA-DRA/HLA-DQA1/HLA-DRB1/HLA-DQB1/HLA-DPA1/HLA-DRB5/HLA-DOA/HLA-DQA2/HLA-G	17
KEGG	hsa04672	Intestinal immune network for IgA production	18/428	1.61342e-11	4.48531e-10	TNFRSF13B/ICOS/HLA-DMA/IL2/HLA-DOB/CD80/HLA-DPB1/PIGR/HLA-DRA/HLA-DQA1/TNFRSF17/HLA-DRB1/HLA-DQB1/HLA-DPA1/HLA-DRB5/CCR9/HLA-DOA/HLA-DQA2	18
KEGG	hsa05321	Inflammatory bowel disease	20/428	5.03735e-11	1.27308e-09	TGFB2/IL12B/IL18/IFNG/HLA-DMA/IL2RG/IL2/HLA-DOB/NOD2/HLA-DPB1/HLA-DRA/HLA-DQA1/HLA-DRB1/IL17A/HLA-DQB1/HLA-DPA1/FOXP3/HLA-DRB5/HLA-DOA/HLA-DQA2	20
KEGG	hsa05320	Autoimmune thyroid disease	18/428	7.42302e-11	1.71967e-09	GZMB/HLA-B/HLA-DMA/CTLA4/IL2/HLA-DOB/CD80/HLA-DPB1/HLA-DRA/HLA-DQA1/HLA-DRB1/CGA/HLA-DQB1/HLA-DPA1/HLA-DRB5/HLA-DOA/HLA-DQA2/HLA-G	18
KEGG	hsa05310	Asthma	14/428	1.12296e-10	2.40141e-09	HLA-DMA/HLA-DOB/HLA-DPB1/RNASE3/HLA-DRA/HLA-DQA1/HLA-DRB1/HLA-DQB1/HLA-DPA1/FCER1A/HLA-DRB5/HLA-DOA/HLA-DQA2/CCL11	14
KEGG	hsa05140	Leishmaniasis	21/428	2.07777e-10	4.12586e-09	TGFB2/CYBB/CR1L/PTGS2/IL12B/ITGAM/ITGB2/C3/NCF2/IFNG/HLA-DMA/HLA-DOB/HLA-DPB1/HLA-DRA/HLA-DQA1/HLA-DRB1/HLA-DQB1/HLA-DPA1/HLA-DRB5/HLA-DOA/HLA-DQA2	21
KEGG	hsa05416	Viral myocarditis	18/428	7.55215e-10	1.39967e-08	RAC2/ITGB2/HLA-B/ICAM1/HLA-DMA/HLA-DOB/CD80/HLA-DPB1/HLA-DRA/HLA-DQA1/HLA-DRB1/CD55/HLA-DQB1/HLA-DPA1/HLA-DRB5/HLA-DOA/HLA-DQA2/HLA-G	18
KEGG	hsa04145	Phagosome	29/428	8.91247e-10	1.54854e-08	FCGR2B/CYBB/C1R/ITGAM/ITGB2/HLA-B/C3/NCF2/HLA-DMA/SFTPA2/HLA-DOB/MRC1/HLA-DPB1/HLA-DRA/HLA-DQA1/HLA-DRB1/OLR1/COLEC12/HLA-DQB1/HLA-DPA1/COMP/TUBB3/THBS2/HLA-DRB5/HLA-DOA/ITGA2/HLA-DQA2/MARCO/HLA-G	29
KEGG	hsa04610	Complement and coagulation cascades	21/428	1.52795e-09	2.49865e-08	CFHR1/CR1L/C1R/PROC/ITGAM/C1S/ITGB2/C3/CFHR3/C2/CFH/FGG/F2RL2/PROS1/PLAUR/PLAU/FGB/CD55/SERPINA1/CFB/SERPINB2	21
KEGG	hsa05146	Amoebiasis	22/428	9.60453e-09	1.48337e-07	TGFB2/IL12B/ITGAM/CXCL3/LAMB3/ITGB2/LAMC2/SERPINB4/IFNG/GNA15/CXCL8/COL1A2/CSF2/CD1C/CD1E/COL3A1/CD1B/CD1A/CXCL1/COL1A1/FN1/SERPINB10	22
KEGG	hsa04657	IL-17 signaling pathway	20/428	5.82536e-08	7.71491e-07	PTGS2/CXCL3/IFNG/CXCL6/CXCL10/IL17C/IL17A/S100A8/CXCL8/S100A9/CSF2/CXCL1/CCL11/CCL7/CXCL5/MMP3/CCL20/CCL17/LCN2/MMP13	20
KEGG	hsa04062	Chemokine signaling pathway	30/428	5.82651e-08	7.71491e-07	XCL2/CXCL14/CXCL3/RAC2/CCR2/CCR6/CCL19/CCL24/HCK/CXCL13/CXCL9/CXCL6/CXCL10/CCL23/GNG8/CXCL8/CXCL11/CCR8/CCR9/CCL13/ADCY8/PPBP/CCL1/CCL22/CXCL1/CCL11/CCL7/CXCL5/CCL20/CCL17	30
KEGG	hsa05145	Toxoplasmosis	22/428	5.82781e-08	7.71491e-07	TGFB2/HSPA6/IL12B/LAMB3/LAMC2/CIITA/IFNG/HLA-DMA/HLA-DOB/HLA-DPB1/HLA-DRA/HLA-DQA1/HLA-DRB1/BIRC3/HLA-DQB1/HLA-DPA1/LDLR/HLA-DRB5/HLA-DOA/HLA-DQA2/BIRC7/ALOX5	22
KEGG	hsa04612	Antigen processing and presentation	18/428	7.21633e-08	9.11882e-07	HSPA6/HLA-B/CIITA/IFNG/HLA-DMA/CD74/HLA-DOB/HLA-DPB1/HLA-DRA/HLA-DQA1/HLA-DRB1/HLA-DQB1/HLA-DPA1/CD8B2/HLA-DRB5/HLA-DOA/HLA-DQA2/HLA-G	18
KEGG	hsa04659	Th17 cell differentiation	20/428	6.39114e-07	7.72494e-06	IL2RA/CD3D/IFNG/HLA-DMA/IL2RG/IL2/HLA-DOB/RUNX1/HLA-DPB1/HLA-DRA/HLA-DQA1/HLA-DRB1/IL17A/HLA-DQB1/HLA-DPA1/EBI3/FOXP3/HLA-DRB5/HLA-DOA/HLA-DQA2	20
KEGG	hsa05166	Human T-cell leukemia virus 1 infection	30/428	1.46797e-06	1.7004e-05	TGFB2/SPI1/CREB3L3/IL2RA/ITGB2/HLA-B/ICAM1/CDKN2B/CD3D/HLA-DMA/IL2RG/IL2/HLA-DOB/HLA-DPB1/HLA-DRA/HLA-DQA1/HLA-DRB1/HLA-DQB1/HLA-DPA1/LTA/HLA-DRB5/HLA-DOA/CSF2/HLA-DQA2/ADCY8/CCNA1/TERT/CDKN2A/HLA-G/MMP7	30
KEGG	hsa05152	Tuberculosis	26/428	2.12814e-06	2.36649e-05	FCGR2B/TGFB2/CR1L/IL12B/ITGAM/IL18/ITGB2/LSP1/C3/CIITA/IFNG/HLA-DMA/CD74/HLA-DOB/MRC1/NOD2/HLA-DPB1/HLA-DRA/HLA-DQA1/HLA-DRB1/HLA-DQB1/HLA-DPA1/HLA-DRB5/HLA-DOA/HLA-DQA2/LBP	26
KEGG	hsa04658	Th1 and Th2 cell differentiation	17/428	4.5952e-06	4.91333e-05	IL12B/IL2RA/CD3D/IFNG/HLA-DMA/IL2RG/IL2/HLA-DOB/HLA-DPB1/HLA-DRA/HLA-DQA1/HLA-DRB1/HLA-DQB1/HLA-DPA1/HLA-DRB5/HLA-DOA/HLA-DQA2	17
KEGG	hsa04512	ECM-receptor interaction	16/428	1.08739e-05	0.000111961	LAMB3/ITGA3/LAMC2/ITGB4/IBSP/ITGA11/ITGB6/COL6A3/TNC/COMP/THBS2/COL6A5/COL1A2/ITGA2/COL1A1/FN1	16
KEGG	hsa04974	Protein digestion and absorption	17/428	2.19725e-05	0.000218155	XPNPEP2/COL8A2/COL24A1/DPP4/MME/COL5A2/COL12A1/PRSS3/COL6A3/COL5A1/COL6A5/COL1A2/KCNN4/COL3A1/COL1A1/COL10A1/COL11A1	17
KEGG	hsa05164	Influenza A	22/428	8.01785e-05	0.000768608	TMPRSS2/IL12B/IL18/RSAD2/CIITA/ICAM1/IFNG/PRSS3/HLA-DMA/HLA-DOB/CXCL10/HLA-DPB1/HLA-DRA/HLA-DQA1/HLA-DRB1/HLA-DQB1/HLA-DPA1/CXCL8/HLA-DRB5/HLA-DOA/HLA-DQA2/TMPRSS4	22
KEGG	hsa05144	Malaria	10/428	0.000218769	0.00202726	TGFB2/CR1L/MET/IL18/ITGB2/ICAM1/IFNG/COMP/CXCL8/THBS2	10
KEGG	hsa05322	Systemic lupus erythematosus	18/428	0.000247425	0.00221884	C1R/C1S/C3/IFNG/C2/HLA-DMA/HLA-DOB/CD80/HLA-DPB1/HLA-DRA/HLA-DQA1/HLA-DRB1/HLA-DQB1/HLA-DPA1/HLA-DRB5/HLA-DOA/HLA-DQA2/ELANE	18
KEGG	hsa04064	NF-kappa B signaling pathway	15/428	0.000314798	0.00273481	PTGS2/CXCL3/CCL19/BCL2A1/ICAM1/CARD11/PLAU/TNFSF11/BIRC3/CXCL8/LTA/CCL13/LBP/LTB/CXCL1	15
KEGG	hsa05340	Primary immunodeficiency	8/428	0.000650116	0.0054132	TNFRSF13B/ICOS/CIITA/CD3D/IL2RG/CD79A/CD8B2/IGLL1	8
KEGG	hsa05134	Legionellosis	10/428	0.000662046	0.0054132	HSPA6/CR1L/IL12B/ITGAM/IL18/CXCL3/ITGB2/C3/CXCL8/CXCL1	10
KEGG	hsa04080	Neuroactive ligand-receptor interaction	33/428	0.00126701	0.0100637	HRH1/GRM5/UTS2/FPR3/NPSR1/NTSR1/MC4R/C3/ADRA2A/PRSS3/SLURP1/HTR2A/F2RL2/PNOC/MCHR1/UCN2/HTR1D/CGA/LPAR3/NPY2R/INSL3/DRD5/CCKAR/PMCH/PDYN/FPR2/RXFP2/ADRB3/NMU/P2RY6/GLRA3/GRP/PTH	33
KEGG	hsa05133	Pertussis	11/428	0.00189153	0.0146069	IL12B/C1R/ITGAM/C1S/ITGB2/C3/C2/SFTPA2/CXCL6/CXCL8/CXCL5	11
KEGG	hsa04668	TNF signaling pathway	14/428	0.00206457	0.0155122	CREB3L3/PTGS2/CXCL3/ICAM1/CXCL6/NOD2/CXCL10/BIRC3/LTA/CSF2/CXCL1/CXCL5/MMP3/CCL20	14
KEGG	hsa04151	PI3K-Akt signaling pathway	31/428	0.00328958	0.0240659	NTRK1/CREB3L3/TCL1A/OSM/IL2RA/MET/LAMB3/ITGA3/LAMC2/FGF10/ITGB4/EFNA5/ERBB3/OSMR/IL2RG/IBSP/IL2/ITGA11/ITGB6/COL6A3/LPAR3/TNC/COMP/GNG8/THBS2/COL6A5/COL1A2/ITGA2/COL1A1/FN1/EREG	31
KEGG	hsa05165	Human papillomavirus infection	29/428	0.00437961	0.0312187	CREB3L3/PTGS2/OASL/WNT10A/LAMB3/ITGA3/ISG15/LAMC2/HLA-B/ITGB4/WNT16/IBSP/ITGA11/ITGB6/COL6A3/TNC/COMP/THBS2/COL6A5/COL1A2/ITGA2/CCNA1/HES2/TERT/WNT2/COL1A1/FN1/HLA-G/WNT7A	29
KEGG	hsa05202	Transcriptional misregulation in cancer	19/428	0.00591103	0.0410816	SPI1/NTRK1/TMPRSS2/GZMB/MET/ITGAM/BCL2A1/WNT16/RUNX1/PLAU/BIRC3/CXCL8/ETV7/CSF2/PROM1/CCNA1/WT1/ELANE/MMP3	19
KEGG	hsa04510	Focal adhesion	19/428	0.00903881	0.0612875	MET/RAC2/LAMB3/ITGA3/LAMC2/ITGB4/IBSP/ITGA11/ITGB6/COL6A3/BIRC3/TNC/COMP/THBS2/COL6A5/COL1A2/ITGA2/COL1A1/FN1	19
KEGG	hsa00601	Glycosphingolipid biosynthesis - lacto and neolacto series	5/428	0.0119913	0.0793713	FUT2/FUT6/FUT9/B3GNT3/FUT3	5

## Sheet: Analysis of high-expressed gene
ONTOLOGY	ID	Description	GeneRatio	pvalue	p.adjust	geneID	Count
BP	GO:0003018	vascular process in circulatory system	33/620	4.57544e-11	1.87959e-07	AGTR1/DRD1/SLC4A4/CD36/EDN3/ABCC8/SLC29A4/SLC6A17/AVPR1A/EDNRB/SLC5A5/NOS1/SLC2A4/ATP1B2/ABCG2/PRKG1/SLC1A2/SLC27A4/SLC6A1/CHRM3/NPPB/SOD3/SH3GL2/ADRA2B/SLC5A1/VEGFA/SLC16A2/PLVAP/NPR3/PDE2A/TBXA2R/SLC6A4/LRP2	33
BP	GO:0015850	organic hydroxy compound transport	30/620	8.59825e-10	1.76608e-06	APOA4/CARTPT/AGTR1/APOA5/DRD1/APOC3/SLC5A8/CD36/GALR1/SLC29A4/SLC22A24/CHRNA4/CETP/APOA1/NOS1/SLC10A4/KCNA2/VIP/AQP7/KCNB1/SYT3/LIPG/ABCC11/MAOB/ADRA2B/SLC5A1/ABCA8/SLCO1B1/SYT15/SLC6A4	30
BP	GO:0042391	regulation of membrane potential	39/620	8.85268e-09	1.21223e-05	KCNK16/GABRG1/POPDC3/CUX2/DRD1/SLC26A3/GRIK4/GABRR3/SLC4A4/KCNJ3/CD36/GRIN2C/KCNK17/KCNE3/P2RX3/CHRNA4/FHL1/GNA14/GABRB3/SCN3A/FGF12/MYOC/KCNA2/GLRA2/KCNB1/ATP1B2/MAPT/SCN4B/KDR/TBX5/GLRA1/RYR2/CHRNA7/RIMS4/KCNC1/KCNK2/GABRD/SCN4A/CTNNA3	39
BP	GO:0019932	second-messenger-mediated signaling	31/620	2.57214e-08	2.64158e-05	AGTR1/EPHA5/NPPC/CD36/EDN3/PDE7B/GRIN2C/AVPR1A/EDNRB/P2RX3/ITPR1/NOS1/GLP1R/PDE10A/MAPT/PRKG1/KDR/CHRM3/NPPB/TRPM5/RYR2/MAFA/VEGFA/RNF157/ADCYAP1R1/RCAN2/HRC/GNAI1/PDE2A/PDZD3/TBXA2R	31
BP	GO:0010817	regulation of hormone levels	41/620	6.99722e-08	5.34898e-05	CARTPT/BMP8A/SFRP1/AGTR1/DIO1/TPO/EPHA5/CRABP1/BCHE/GCK/EDN3/ABCC8/GALR1/DUOXA2/DGAT2/DUOX2/PRLHR/CYP26B1/WNT4/EDNRB/SLC5A5/TRPV6/VIP/KCNB1/TG/CYP17A1/PASK/ISL1/HSD17B3/MAFA/BRSK2/DIO2/SLC16A2/PLA2G3/HSD17B6/CYP46A1/SLC30A8/ENPEP/AKR1C2/RAPGEF4/SLCO1B1	41
BP	GO:0015849	organic acid transport	31/620	7.81254e-08	5.34898e-05	SLC7A10/CRABP1/SLC26A3/SLC5A8/SPX/CD36/FABP4/SLC29A4/SLC6A17/AVPR1A/SLC26A4/SLC26A7/SLC13A2/NPY5R/SLC10A4/OCA2/ABCG2/ABCC11/SLC1A2/SLC25A15/SLC27A4/SLC6A1/SLC38A11/SLC26A8/SLC16A2/PLA2G3/TRPC4/PLA2G4F/SLCO1B1/LRP2/SLC43A1	31
BP	GO:0006821	chloride transport	17/620	1.32508e-07	6.69422e-05	GABRG1/CLCNKA/SLC26A3/GABRR3/SLC26A4/SLC26A7/GABRB3/GLRA2/SLC4A1/CLCNKB/SLC6A1/GLRA1/CA2/SLC26A8/GABRD/ANO2/TTYH2	17
BP	GO:0010232	vascular transport	15/620	1.4666e-07	6.69422e-05	SLC4A4/CD36/SLC29A4/SLC6A17/AVPR1A/SLC5A5/SLC2A4/ATP1B2/ABCG2/SLC1A2/SLC27A4/SLC6A1/SLC5A1/SLC16A2/LRP2	15
BP	GO:0150104	transport across blood-brain barrier	15/620	1.4666e-07	6.69422e-05	SLC4A4/CD36/SLC29A4/SLC6A17/AVPR1A/SLC5A5/SLC2A4/ATP1B2/ABCG2/SLC1A2/SLC27A4/SLC6A1/SLC5A1/SLC16A2/LRP2	15
BP	GO:0006590	thyroid hormone generation	8/620	1.86145e-07	7.37603e-05	DIO1/TPO/DUOXA2/DUOX2/SLC5A5/TG/DIO2/SLC16A2	8
BP	GO:1902476	chloride transmembrane transport	13/620	1.97508e-07	7.37603e-05	GABRG1/SLC26A3/GABRR3/SLC26A4/SLC26A7/GABRB3/GLRA2/SLC4A1/SLC6A1/GLRA1/SLC26A8/GABRD/ANO2	13
BP	GO:0015711	organic anion transport	32/620	4.23897e-07	0.000145114	CA4/SLCO6A1/SLC7A10/SLC26A3/SLC4A4/SLC5A8/CD36/SLC6A17/AVPR1A/SLC26A4/SLC26A7/SLC13A2/SLC22A24/NPY5R/SLC10A4/SLC4A1/ABCG2/ABCC11/SLC1A2/SLC25A15/SLC27A4/SLC6A1/SLC22A10/SLC26A8/SLC16A2/PLA2G3/TRPC4/PLA2G4F/SLCO2A1/SLCO1B1/LRP2/SLC43A1	32
BP	GO:0035637	multicellular organismal signaling	20/620	4.93094e-07	0.000147971	CARTPT/ATP2B3/DRD1/KCNJ3/AVPR1A/KCNE3/P2RX3/SCN3A/FGF12/KCNA2/ATP1B2/ISL1/SCN4B/TBX5/GLRA1/RYR2/CNTNAP2/SCN4A/HRC/CTNNA3	20
BP	GO:0019935	cyclic-nucleotide-mediated signaling	14/620	5.04283e-07	0.000147971	EPHA5/NPPC/CD36/PDE7B/EDNRB/GLP1R/PDE10A/PRKG1/NPPB/RNF157/ADCYAP1R1/GNAI1/PDE2A/PDZD3	14
BP	GO:0015698	inorganic anion transport	21/620	6.50873e-07	0.000178252	GABRG1/CLCNKA/SLC26A3/GABRR3/SLC4A4/SLC26A4/SLC26A7/GABRB3/SLC5A5/GLRA2/SLC4A1/TG/ABCC11/CLCNKB/SLC6A1/GLRA1/CA2/SLC26A8/GABRD/ANO2/TTYH2	21
BP	GO:0045165	cell fate commitment	26/620	8.30067e-07	0.00021312	NR2E1/RAG2/TBXT/SFRP1/SOSTDC1/TBX22/CYP26B1/WNT4/TBR1/TBX2/WNT3A/NKX2-2/WNT11/GDF7/ISL1/KDR/TBX5/GATA5/MYT1L/TAL1/AR/ONECUT2/EBF2/NOTCH4/PROX1/ERBB4	26
BP	GO:0098661	inorganic anion transmembrane transport	14/620	1.39377e-06	0.000336801	GABRG1/SLC26A3/GABRR3/SLC26A4/SLC26A7/GABRB3/SLC5A5/GLRA2/SLC4A1/SLC6A1/GLRA1/SLC26A8/GABRD/ANO2	14
BP	GO:0042403	thyroid hormone metabolic process	8/620	1.70427e-06	0.000388952	DIO1/TPO/DUOXA2/DUOX2/SLC5A5/TG/DIO2/SLC16A2	8
BP	GO:1903522	regulation of blood circulation	25/620	1.81842e-06	0.000393162	ATP2B3/AGTR1/SPX/KCNJ3/EDN3/HSPB7/AVPR1A/TACR3/KCNE3/EDNRB/TBX2/NOS1/ADM2/GLP1R/ATP1B2/ISL1/SCN4B/CHRM3/TBX5/ADRA2B/RYR2/HRC/CTNNA3/TBXA2R/MYL4	25
BP	GO:0046942	carboxylic acid transport	26/620	2.04145e-06	0.000419313	SLC7A10/SLC26A3/SLC5A8/CD36/SLC6A17/AVPR1A/SLC26A4/SLC26A7/SLC13A2/NPY5R/SLC10A4/ABCG2/ABCC11/SLC1A2/SLC25A15/SLC27A4/SLC6A1/SLC26A8/SLC16A2/PLA2G3/TRPC4/PLA2G4F/SLCO2A1/SLCO1B1/LRP2/SLC43A1	26
BP	GO:0015844	monoamine transport	13/620	3.05661e-06	0.000597931	CARTPT/DRD1/SLC29A4/CHRNA4/NOS1/KCNA2/VIP/KCNB1/SYT3/MAOB/ADRA2B/SYT15/SLC6A4	13
BP	GO:0097006	regulation of plasma lipoprotein particle levels	13/620	3.50878e-06	0.000655185	APOA4/AGTR1/APOA5/APOC3/CD36/ABCC8/DGAT2/CETP/APOA1/LIPG/GPIHBP1/PLA2G3/FGF21	13
BP	GO:0034368	protein-lipid complex remodeling	8/620	4.11659e-06	0.000704622	APOA4/AGTR1/APOA5/APOC3/CETP/APOA1/LIPG/PLA2G3	8
BP	GO:0034369	plasma lipoprotein particle remodeling	8/620	4.11659e-06	0.000704622	APOA4/AGTR1/APOA5/APOC3/CETP/APOA1/LIPG/PLA2G3	8
BP	GO:0019433	triglyceride catabolic process	8/620	5.38904e-06	0.000885528	APOA4/APOA5/LIPI/APOC3/APOA1/LIPG/GPIHBP1/FGF21	8
BP	GO:0034367	protein-containing complex remodeling	8/620	6.97904e-06	0.00107445	APOA4/AGTR1/APOA5/APOC3/CETP/APOA1/LIPG/PLA2G3	8
BP	GO:0008016	regulation of heart contraction	21/620	7.06184e-06	0.00107445	ATP2B3/SPX/KCNJ3/EDN3/HSPB7/AVPR1A/TACR3/KCNE3/EDNRB/TBX2/NOS1/ADM2/GLP1R/ATP1B2/ISL1/SCN4B/TBX5/RYR2/HRC/CTNNA3/MYL4	21
BP	GO:0034375	high-density lipoprotein particle remodeling	6/620	7.58057e-06	0.00111218	APOA4/APOC3/CETP/APOA1/LIPG/PLA2G3	6
BP	GO:0060047	heart contraction	23/620	7.97309e-06	0.00111677	ATP2B3/SPX/KCNJ3/EDN3/HSPB7/AVPR1A/TACR3/KCNE3/EDNRB/TBX2/FGF12/NOS1/ADM2/GLP1R/ATP1B2/ISL1/SCN4B/TBX5/RYR2/MYL7/HRC/CTNNA3/MYL4	23
BP	GO:0042445	hormone metabolic process	22/620	8.15557e-06	0.00111677	DIO1/TPO/CRABP1/BCHE/DUOXA2/DGAT2/DUOX2/PRLHR/CYP26B1/WNT4/EDNRB/SLC5A5/TG/CYP17A1/HSD17B3/DIO2/SLC16A2/HSD17B6/CYP46A1/SLC30A8/ENPEP/AKR1C2	22
BP	GO:0071294	cellular response to zinc ion	7/620	8.70023e-06	0.00115292	MT1H/MT1G/MT1F/GLRA2/MT1M/GLRA1/MT1HL1	7
BP	GO:0051952	regulation of amine transport	13/620	9.83567e-06	0.00126265	CARTPT/DRD1/AVPR1A/CHRNA4/NPY5R/KCNA2/VIP/KCNB1/SYT3/SLC6A1/ADRA2B/SYT15/SLC43A1	13
BP	GO:0008217	regulation of blood pressure	19/620	1.04609e-05	0.00126392	CARTPT/AGTR1/SPX/EDN3/AVPR1A/TACR3/HSD11B2/EDNRB/NOS1/ADM2/GLP1R/NPPB/ADRA2B/CORO2B/AR/ENPEP/BRS3/NPR3/TBXA2R	19
BP	GO:0048469	cell maturation	19/620	1.04609e-05	0.00126392	SEMG1/SLC26A3/NPPC/TFCP2L1/CATSPERZ/EDNRB/MYOC/EPHA8/VSX1/KDR/CNTN2/CNTNAP2/TAL1/VEGFA/SLC26A8/PLA2G3/GLDN/TRIM58/BFSP1	19
BP	GO:0006936	muscle contraction	28/620	1.47683e-05	0.00173338	DRD1/SPX/KCNJ3/EDN3/KIT/TACR3/KCNE3/EDNRB/P2RX3/TBX2/FGF12/NOS1/CKMT2/KBTBD13/PRKG1/SCN4B/MYH3/CHRM3/GLRA1/ADRA2B/RYR2/SYNM/PVALEF/SCN4A/HRC/CTNNA3/TBXA2R/MYL4	28
BP	GO:0003015	heart process	23/620	1.52353e-05	0.00173852	ATP2B3/SPX/KCNJ3/EDN3/HSPB7/AVPR1A/TACR3/KCNE3/EDNRB/TBX2/FGF12/NOS1/ADM2/GLP1R/ATP1B2/ISL1/SCN4B/TBX5/RYR2/MYL7/HRC/CTNNA3/MYL4	23
BP	GO:0019934	cGMP-mediated signaling	8/620	1.78712e-05	0.00193197	NPPC/CD36/EDNRB/PDE10A/PRKG1/NPPB/PDE2A/PDZD3	8
BP	GO:0045777	positive regulation of blood pressure	8/620	1.78712e-05	0.00193197	CARTPT/SPX/AVPR1A/TACR3/HSD11B2/GLP1R/ADRA2B/TBXA2R	8
BP	GO:0006813	potassium ion transport	22/620	1.94148e-05	0.00201413	KCNK16/KCNJ13/KCNAB1/DRD1/GCK/KCNJ3/EDN3/ABCC8/DPP6/KCNK17/KCNE3/FHL1/NOS1/KCNA2/VIP/KCNB1/KCNG4/ATP1B2/TRPM5/KCNC1/KCNK2/KCNIP3	22
BP	GO:0072503	cellular divalent inorganic cation homeostasis	35/620	1.97502e-05	0.00201413	MT1H/MT1G/ATP2B3/AGTR1/DRD1/MT1F/CD36/EDN3/GALR1/GRIN2C/SCGN/GP9/AVPR1A/EDNRB/P2RX3/ITPR1/NOS1/GLP1R/TRPV6/MT1M/RYR2/CHRNA7/GPR17/HAP1/CTRC/SLC30A8/ADCYAP1R1/TRPC4/MT1HL1/HRC/SLC39A12/TRPC6/TBXA2R/CCL14/ATP2C2	35
BP	GO:0001508	action potential	16/620	2.03859e-05	0.00201413	DRD1/KCNJ3/CD36/KCNE3/P2RX3/CHRNA4/GNA14/SCN3A/FGF12/KCNA2/KCNB1/SCN4B/GLRA1/RYR2/SCN4A/CTNNA3	16
BP	GO:0007188	adenylate cyclase-modulating G protein-coupled receptor signaling pathway	22/620	2.06933e-05	0.00201413	GNAT3/DRD1/GALR1/VIPR1/GNA14/ADM2/GLP1R/VIP/CHRM3/ADRA2B/RXFP1/HTR1E/GRM3/LHCGR/ADCYAP1R1/NPR3/RAPGEF4/ADGRG3/GNAI1/PDE2A/TBXA2R/ADGRG4	22
BP	GO:0018958	phenol-containing compound metabolic process	14/620	2.10827e-05	0.00201413	DIO1/TPO/DRD1/DUOXA2/DUOX2/TACR3/SLC5A5/OCA2/TG/MAOB/DIO2/SULT1A2/SLC16A2/PDE1B	14
BP	GO:0034765	regulation of ion transmembrane transport	34/620	2.19433e-05	0.00204871	PLP1/KCNK16/KCNJ13/KCNAB1/DRD1/CLCNKA/KCNJ3/EDN3/ABCC8/DPP6/KCNK17/KCNE3/FHL1/SCN3A/FGF12/NOS1/KCNA2/KCNB1/KCNG4/ATP1B2/CACNA2D2/CACNB4/CLCNKB/SCN4B/CHRM3/TRPM5/RYR2/KCNC1/HAP1/SCN4A/KCNIP3/HRC/TRPC6/SLC43A1	34
BP	GO:0015837	amine transport	13/620	2.46175e-05	0.00219172	CARTPT/DRD1/AVPR1A/CHRNA4/NPY5R/KCNA2/VIP/KCNB1/SYT3/SLC6A1/ADRA2B/SYT15/SLC43A1	13
BP	GO:0034370	triglyceride-rich lipoprotein particle remodeling	5/620	2.50756e-05	0.00219172	APOA4/APOA5/APOC3/CETP/APOA1	5
BP	GO:0034372	very-low-density lipoprotein particle remodeling	5/620	2.50756e-05	0.00219172	APOA4/APOA5/APOC3/CETP/APOA1	5
BP	GO:0006639	acylglycerol metabolic process	15/620	2.79441e-05	0.00239155	APOA4/APOA5/LIPI/APOC3/DGAT2/CETP/APOA1/LIPF/DGKI/LIPG/GPIHBP1/GPAM/NKX2-3/DGKB/FGF21	15
BP	GO:0006638	neutral lipid metabolic process	15/620	3.05859e-05	0.00256422	APOA4/APOA5/LIPI/APOC3/DGAT2/CETP/APOA1/LIPF/DGKI/LIPG/GPIHBP1/GPAM/NKX2-3/DGKB/FGF21	15
BP	GO:0006641	triglyceride metabolic process	13/620	3.38605e-05	0.00273769	APOA4/APOA5/LIPI/APOC3/DGAT2/CETP/APOA1/LIPF/LIPG/GPIHBP1/GPAM/NKX2-3/FGF21	13
BP	GO:0015701	bicarbonate transport	7/620	3.39878e-05	0.00273769	CA4/SLC26A3/SLC4A4/SLC26A4/SLC26A7/SLC4A1/SLC26A8	7
BP	GO:0003012	muscle system process	32/620	3.97935e-05	0.00314369	DRD1/SPX/KCNJ3/EDN3/ABCC8/KIT/TACR3/KCNE3/EDNRB/P2RX3/TBX2/FGF12/NOS1/MYOC/SORBS2/CKMT2/KBTBD13/PRKG1/SCN4B/MYH3/CHRM3/GLRA1/ADRA2B/RYR2/GATA5/SYNM/PVALEF/SCN4A/HRC/CTNNA3/TBXA2R/MYL4	32
BP	GO:0002027	regulation of heart rate	13/620	4.15882e-05	0.00316378	SPX/KCNJ3/EDN3/AVPR1A/TACR3/KCNE3/EDNRB/ADM2/ISL1/SCN4B/RYR2/HRC/CTNNA3	13
BP	GO:1901890	positive regulation of cell junction assembly	13/620	4.15882e-05	0.00316378	SFRP1/LRTM2/CUX2/IL1RAPL1/SLITRK5/LINGO2/WNT4/LRRTM1/MYOC/KDR/TBX5/CNTNAP2/VEGFA	13
BP	GO:0051339	regulation of lyase activity	11/620	4.25351e-05	0.00317699	DRD1/GALR1/ADGRV1/EDNRB/NOS1/GLP1R/RXFP1/GRM3/LHCGR/NPR3/PDZD3	11
BP	GO:0023061	signal release	32/620	4.33466e-05	0.00317978	CARTPT/BMP8A/SFRP1/AGTR1/EPHA5/DRD1/GCK/EDN3/ABCC8/GALR1/RPH3A/EDNRB/CHRNA4/KCNA2/TRPV6/VIP/KCNB1/SYT3/PASK/ISL1/MAOB/ADRA2B/RIMS4/MAFA/BRSK2/SLC16A2/PLA2G3/SLC30A8/RAPGEF4/SYN3/SYT15/SLC6A4	32
BP	GO:0007631	feeding behavior	13/620	4.59979e-05	0.00331508	CARTPT/PPY/CNTFR/DRD1/PRLHR/TACR3/TBR1/NPY5R/ADM2/SGIP1/CNTN2/HELT/BRS3	13
BP	GO:0031279	regulation of cyclase activity	11/620	4.80665e-05	0.00334102	DRD1/GALR1/ADGRV1/EDNRB/NOS1/GLP1R/RXFP1/GRM3/LHCGR/NPR3/PDZD3	11
BP	GO:0046461	neutral lipid catabolic process	8/620	4.87977e-05	0.00334102	APOA4/APOA5/LIPI/APOC3/APOA1/LIPG/GPIHBP1/FGF21	8
BP	GO:0046464	acylglycerol catabolic process	8/620	4.87977e-05	0.00334102	APOA4/APOA5/LIPI/APOC3/APOA1/LIPG/GPIHBP1/FGF21	8
BP	GO:0010043	response to zinc ion	9/620	5.27292e-05	0.00355101	MT1H/MT1G/MT1F/ABCC8/GLRA2/MT1M/GLRA1/SLC30A8/MT1HL1	9
BP	GO:0010896	regulation of triglyceride catabolic process	5/620	5.99954e-05	0.00391208	APOA4/APOA5/APOC3/APOA1/FGF21	5
BP	GO:0019755	one-carbon compound transport	5/620	5.99954e-05	0.00391208	SLC14A2/AQP7/AQP4/CA2/SLC14A1	5
BP	GO:0042044	fluid transport	7/620	6.7258e-05	0.00429529	EDNRB/ITPR1/AQP7/AQP4/SLC5A1/SLC14A1/PDZD3	7
BP	GO:0043266	regulation of potassium ion transport	13/620	6.79634e-05	0.00429529	KCNAB1/DRD1/GCK/EDN3/ABCC8/DPP6/KCNE3/FHL1/NOS1/VIP/ATP1B2/KCNC1/KCNIP3	13
BP	GO:0098656	anion transmembrane transport	21/620	7.46688e-05	0.00464757	GABRG1/SLC26A3/GABRR3/SLC4A4/SLC5A8/SLC26A4/SLC26A7/SLC13A2/GABRB3/SLC5A5/GLRA2/SLC4A1/SLC1A2/SLC25A15/SLC6A1/GLRA1/SLC26A8/GABRD/ANO2/LRP2/SLC43A1	21
BP	GO:0042180	cellular ketone metabolic process	19/620	7.58765e-05	0.00465225	APOA4/APOA5/APOC3/DGAT2/AVPR1A/WNT4/HSD11B2/EDNRB/APOA1/CYP17A1/HSD17B3/PPARGC1A/PDK4/PLA2G3/HSD17B6/CYP46A1/AKR1C2/PROX1/SULT1C4	19
BP	GO:0014821	phasic smooth muscle contraction	6/620	7.84478e-05	0.00473917	DRD1/EDN3/KIT/EDNRB/P2RX3/TBX2	6
BP	GO:0006814	sodium ion transport	21/620	8.37965e-05	0.00498893	SLC5A7/SLC4A4/SLC5A8/SLC6A17/KCNE3/EDNRB/SLC13A2/SCN3A/FGF12/SLC5A5/NOS1/SLC10A4/SLC5A4/ATP1B2/SCN4B/SLC6A1/TRPM5/SLC5A1/SLC38A11/SCN4A/SLC6A4	21
BP	GO:0010273	detoxification of copper ion	5/620	8.75562e-05	0.00506593	MT1H/MT1G/MT1F/MT1M/MT1HL1	5
BP	GO:1990169	stress response to copper ion	5/620	8.75562e-05	0.00506593	MT1H/MT1G/MT1F/MT1M/MT1HL1	5
BP	GO:0071827	plasma lipoprotein particle organization	8/620	9.80257e-05	0.00559291	APOA4/AGTR1/APOA5/APOC3/CETP/APOA1/LIPG/PLA2G3	8
BP	GO:0031280	negative regulation of cyclase activity	6/620	0.000101697	0.00572289	GALR1/ADGRV1/EDNRB/GRM3/NPR3/PDZD3	6
BP	GO:0045761	regulation of adenylate cyclase activity	9/620	0.00010944	0.00607539	DRD1/GALR1/ADGRV1/EDNRB/GLP1R/RXFP1/GRM3/LHCGR/NPR3	9
BP	GO:0051937	catecholamine transport	10/620	0.00012026	0.00658706	CARTPT/DRD1/SLC29A4/CHRNA4/KCNA2/VIP/KCNB1/SYT3/ADRA2B/SYT15	10
BP	GO:0098754	detoxification	15/620	0.000133765	0.00721827	APOA4/MT1H/MT1G/TPO/MT1F/CD36/DUOX2/IPCEF1/NQO1/MT1M/ABCG2/SOD3/GSTM3/MT1HL1/MTARC1	15
BP	GO:0019226	transmission of nerve impulse	10/620	0.000135299	0.00721827	CARTPT/DRD1/AVPR1A/P2RX3/SCN3A/FGF12/KCNA2/GLRA1/CNTNAP2/SCN4A	10
BP	GO:0001539	cilium or flagellum-dependent cell motility	15/620	0.000144099	0.00749315	SEMG1/EPPIN/CFAP47/TEKT4/GAPDHS/CATSPERZ/TACR3/NME8/CFAP65/TEKT1/SLC26A8/PLA2G3/TNP1/DNAAF6/EFHC2	15
BP	GO:0060285	cilium-dependent cell motility	15/620	0.000144099	0.00749315	SEMG1/EPPIN/CFAP47/TEKT4/GAPDHS/CATSPERZ/TACR3/NME8/CFAP65/TEKT1/SLC26A8/PLA2G3/TNP1/DNAAF6/EFHC2	15
BP	GO:0050905	neuromuscular process	15/620	0.00015512	0.0078733	DRD1/IGDCC3/CSMD1/GRIN2C/CTNNA2/ITPR1/FGF12/RBFOX1/KBTBD13/USH1C/MYH3/GLRA1/SYNM/PVALEF/SCN4A	15
BP	GO:0034329	cell junction assembly	29/620	0.000156721	0.0078733	SFRP1/LRTM2/CUX2/IL1RAPL1/DRD1/SLITRK5/LINGO2/WNT4/GABRB3/GJB1/CNTN5/WNT3A/LRRTM1/MYOC/WNT11/KDR/CTNND2/TBX5/CDH2/CNTNAP2/CORO2B/VEGFA/SHANK2/CDH8/ADD2/SDK2/ERBB4/SLIT1/UGT8	29
BP	GO:0071825	protein-lipid complex subunit organization	8/620	0.000157322	0.0078733	APOA4/AGTR1/APOA5/APOC3/CETP/APOA1/LIPG/PLA2G3	8
BP	GO:0003341	cilium movement	17/620	0.000159076	0.0078733	SEMG1/EPPIN/CFAP47/TEKT4/GAPDHS/CATSPERZ/TACR3/DNAAF1/NME8/CFAP65/AQP4/TEKT1/DNAI2/SLC26A8/PLA2G3/TNP1/DNAAF6	17
BP	GO:0007586	digestion	14/620	0.000176504	0.00861803	APOA4/APOA5/CD36/TFF2/SLC26A7/TFF1/APOA1/ADM2/PPARGC1A/CHRM3/SLC5A1/TFF3/NPR3/AKR1C2	14
BP	GO:0010092	specification of animal organ identity	7/620	0.000178319	0.00861803	TBR1/WNT3A/WNT11/ISL1/GATA5/AR/LRP2	7
BP	GO:0007611	learning or memory	21/620	0.00019025	0.00900028	CUX2/TAFA2/DRD1/BCHE/CSMD1/ABCC8/KIT/TBR1/SLC2A4/GLP1R/RAG1/VIP/MAPT/SLC6A1/CNTN2/CHRNA7/CNTNAP2/KCNK2/SHANK2/PDE1B/SLC6A4	21
BP	GO:0060294	cilium movement involved in cell motility	14/620	0.00019061	0.00900028	SEMG1/EPPIN/CFAP47/TEKT4/GAPDHS/CATSPERZ/TACR3/NME8/CFAP65/TEKT1/SLC26A8/PLA2G3/TNP1/DNAAF6	14
BP	GO:0071695	anatomical structure maturation	20/620	0.00020104	0.00907715	SEMG1/SLC26A3/NPPC/TFCP2L1/SPINK5/CATSPERZ/EDNRB/MYOC/EPHA8/VSX1/KDR/CNTN2/CNTNAP2/TAL1/VEGFA/SLC26A8/PLA2G3/GLDN/TRIM58/BFSP1	20
BP	GO:0010460	positive regulation of heart rate	6/620	0.000205586	0.00907715	EDN3/AVPR1A/TACR3/ADM2/RYR2/HRC	6
BP	GO:0051350	negative regulation of lyase activity	6/620	0.000205586	0.00907715	GALR1/ADGRV1/EDNRB/GRM3/NPR3/PDZD3	6
BP	GO:0097254	renal tubular secretion	6/620	0.000205586	0.00907715	AGTR1/SPX/AVPR1A/EDNRB/ABCG2/NPPB	6
BP	GO:0006702	androgen biosynthetic process	4/620	0.000209915	0.00907715	WNT4/CYP17A1/HSD17B3/HSD17B6	4
BP	GO:0051006	positive regulation of lipoprotein lipase activity	4/620	0.000209915	0.00907715	APOA4/APOA5/APOA1/GPIHBP1	4
BP	GO:0090037	positive regulation of protein kinase C signaling	4/620	0.000209915	0.00907715	ADGRV1/WNT11/FLT4/VEGFA	4
BP	GO:2000048	negative regulation of cell-cell adhesion mediated by cadherin	4/620	0.000209915	0.00907715	RGCC/VEGFA/NEXMIF/NOTCH4	4
BP	GO:0009636	response to toxic substance	20/620	0.000212174	0.00907928	APOA4/MT1H/MT1G/TPO/MT1F/CD36/DUOX2/IPCEF1/NQO1/MT1M/ABCG2/SLC6A1/MAOB/SOD3/KCNC1/GSTM3/MT1HL1/MTARC1/PDZD3/SLC6A4	20
BP	GO:0050890	cognition	23/620	0.000221187	0.00935865	CUX2/TAFA2/DRD1/BCHE/CSMD1/ABCC8/KIT/TBR1/CHRNA4/SLC2A4/GLP1R/RAG1/VIP/MAPT/SLC6A1/CNTN2/CHRNA7/CNTNAP2/KCNK2/LHCGR/SHANK2/PDE1B/SLC6A4	23
BP	GO:0050804	modulation of chemical synaptic transmission	29/620	0.000224313	0.00935865	NR2E1/CUX2/DRD1/GRIK4/BCHE/GRIN2C/SCGN/KIT/P2RX3/NPY5R/WNT3A/LRRTM1/KCNB1/MAPT/DGKI/SLC6A1/CNTN2/DLGAP2/BEGAIN/CDH2/CHRNA7/RIMS4/CA2/HAP1/GRM3/CYP46A1/SHANK2/SYN3/SLC6A4	29
BP	GO:0042886	amide transport	22/620	0.000228584	0.00935865	SLC14A2/CARTPT/BMP8A/SFRP1/EPHA5/GCK/EDN3/ABCC8/VIP/AQP7/KCNB1/ABCG2/PASK/ISL1/MAFA/BRSK2/CA2/SLC16A2/SLC30A8/RAPGEF4/SLC14A1/LRP2	22
BP	GO:0003128	heart field specification	5/620	0.000230093	0.00935865	WNT3A/WNT11/ISL1/GATA5/LRP2	5
BP	GO:0061687	detoxification of inorganic compound	5/620	0.000230093	0.00935865	MT1H/MT1G/MT1F/MT1M/MT1HL1	5
BP	GO:0099177	regulation of trans-synaptic signaling	29/620	0.000233233	0.00939333	NR2E1/CUX2/DRD1/GRIK4/BCHE/GRIN2C/SCGN/KIT/P2RX3/NPY5R/WNT3A/LRRTM1/KCNB1/MAPT/DGKI/SLC6A1/CNTN2/DLGAP2/BEGAIN/CDH2/CHRNA7/RIMS4/CA2/HAP1/GRM3/CYP46A1/SHANK2/SYN3/SLC6A4	29
BP	GO:0035296	regulation of tube diameter	14/620	0.00023891	0.00943695	AGTR1/DRD1/EDN3/AVPR1A/EDNRB/NOS1/PRKG1/CHRM3/NPPB/SOD3/ADRA2B/NPR3/TBXA2R/SLC6A4	14
BP	GO:0097746	blood vessel diameter maintenance	14/620	0.00023891	0.00943695	AGTR1/DRD1/EDN3/AVPR1A/EDNRB/NOS1/PRKG1/CHRM3/NPPB/SOD3/ADRA2B/NPR3/TBXA2R/SLC6A4	14
BP	GO:0006882	cellular zinc ion homeostasis	7/620	0.000251616	0.00976778	MT1H/MT1G/MT1F/MT1M/SLC30A8/MT1HL1/SLC39A12	7
BP	GO:0009410	response to xenobiotic stimulus	28/620	0.000252274	0.00976778	SFRP1/DRD1/BCHE/NPPC/ABCC8/HMGCS2/CYP26B1/UGT1A6/HSD11B2/NOS1/TIMP4/NQO1/PGF/EMX1/SLC1A2/MAOB/KCNC1/SULT1A2/GSTM3/FGF21/AOX1/CYP46A1/ADCYAP1R1/SHANK2/VAV3/SULT1C4/TBXA2R/SLC6A4	28
BP	GO:0044331	cell-cell adhesion mediated by cadherin	6/620	0.000254419	0.00976778	WNT3A/RGCC/CDH2/VEGFA/NEXMIF/NOTCH4	6
BP	GO:0035150	regulation of tube size	14/620	0.000257191	0.00978277	AGTR1/DRD1/EDN3/AVPR1A/EDNRB/NOS1/PRKG1/CHRM3/NPPB/SOD3/ADRA2B/NPR3/TBXA2R/SLC6A4	14
BP	GO:0006869	lipid transport	27/620	0.000261103	0.00984048	APOA4/AGTR1/APOA5/CRABP1/APOC3/SLC5A8/SPX/CD36/FABP4/GALR1/SLC22A24/CETP/APOA1/SLC10A4/SLC4A1/LIPG/ABCG2/ABCC11/SLC27A4/ABCA8/PLA2G3/LPA/PLA2G4F/APOLD1/SLCO2A1/APOL5/SLCO1B1	27
BP	GO:0007588	excretion	9/620	0.000267726	0.00990826	AGTR1/CLCNKA/SLC26A3/SPX/AVPR1A/EDNRB/ABCG2/CLCNKB/NPPB	9
BP	GO:0042446	hormone biosynthetic process	9/620	0.000267726	0.00990826	DIO1/TPO/DUOX2/WNT4/TG/CYP17A1/HSD17B3/DIO2/HSD17B6	9
BP	GO:0010038	response to metal ion	25/620	0.000274465	0.010067	MT1H/MT1G/MT1F/FABP4/ABCC8/ADGRV1/HMGCS2/KIT/TFF1/TRPV6/GLRA2/NQO1/SYT3/MT1M/MAPT/SLC6A1/MAOB/SOD3/GLRA1/RYR2/KCNC1/SLC30A8/MT1HL1/DLG2/SYT15	25
BP	GO:0003073	regulation of systemic arterial blood pressure	11/620	0.000291244	0.0105121	AGTR1/SPX/EDN3/AVPR1A/HSD11B2/EDNRB/ADM2/NPPB/CORO2B/AR/ENPEP	11
BP	GO:0008306	associative learning	10/620	0.000291718	0.0105121	TAFA2/DRD1/CSMD1/ABCC8/KIT/TBR1/RAG1/SLC6A1/SHANK2/PDE1B	10
BP	GO:0097501	stress response to metal ion	5/620	0.000303841	0.010818	MT1H/MT1G/MT1F/MT1M/MT1HL1	5
BP	GO:0007416	synapse assembly	16/620	0.000317136	0.010818	LRTM2/CUX2/IL1RAPL1/DRD1/SLITRK5/LINGO2/GABRB3/CNTN5/WNT3A/LRRTM1/CDH2/SHANK2/ADD2/SDK2/ERBB4/SLIT1	16
BP	GO:0001708	cell fate specification	11/620	0.000319333	0.010818	TBXT/TBX22/TBR1/TBX2/WNT3A/NKX2-2/WNT11/ISL1/TBX5/MYT1L/AR	11
BP	GO:0034381	plasma lipoprotein particle clearance	8/620	0.000319774	0.010818	APOC3/CD36/ABCC8/DGAT2/APOA1/LIPG/GPIHBP1/FGF21	8
BP	GO:0019532	oxalate transport	4/620	0.000321274	0.010818	SLC26A3/SLC26A4/SLC26A7/SLC26A8	4
BP	GO:0045161	neuronal ion channel clustering	4/620	0.000321274	0.010818	MYOC/CNTN2/CNTNAP2/GLDN	4
BP	GO:0048241	epinephrine transport	4/620	0.000321274	0.010818	CARTPT/SLC29A4/VIP/ADRA2B	4
BP	GO:0061365	positive regulation of triglyceride lipase activity	4/620	0.000321274	0.010818	APOA4/APOA5/APOA1/GPIHBP1	4
BP	GO:0006939	smooth muscle contraction	12/620	0.000325468	0.0108701	DRD1/SPX/EDN3/KIT/TACR3/EDNRB/P2RX3/TBX2/PRKG1/CHRM3/ADRA2B/TBXA2R	12
BP	GO:0062013	positive regulation of small molecule metabolic process	14/620	0.000342837	0.0113579	APOA4/APOA5/SLC4A4/GCK/DGAT2/GAPDHS/AVPR1A/WNT4/APOA1/NOS1/PPARGC1A/PLA2G3/LHCGR/ADCYAP1R1	14
BP	GO:0055069	zinc ion homeostasis	7/620	0.000347391	0.0114167	MT1H/MT1G/MT1F/MT1M/SLC30A8/MT1HL1/SLC39A12	7
BP	GO:0071805	potassium ion transmembrane transport	18/620	0.000361052	0.0117714	KCNK16/KCNJ13/KCNAB1/KCNJ3/EDN3/ABCC8/DPP6/KCNK17/KCNE3/FHL1/KCNA2/KCNB1/KCNG4/ATP1B2/TRPM5/KCNC1/KCNK2/KCNIP3	18
BP	GO:0046503	glycerolipid catabolic process	9/620	0.000378128	0.0121356	APOA4/APOA5/LIPI/APOC3/APOA1/LIPG/GPIHBP1/FGF21/PLA2G4F	9
BP	GO:0060193	positive regulation of lipase activity	9/620	0.000378128	0.0121356	APOA4/AGTR1/APOA5/KIT/AVPR1A/APOA1/FLT1/GPIHBP1/ADCYAP1R1	9
BP	GO:0021516	dorsal spinal cord development	5/620	0.000394197	0.0122679	WNT3A/GDF7/PBX3/TAL1/PROX1	5
BP	GO:0035813	regulation of renal sodium excretion	5/620	0.000394197	0.0122679	AGTR1/SPX/AVPR1A/EDNRB/NPPB	5
BP	GO:0043691	reverse cholesterol transport	5/620	0.000394197	0.0122679	APOA4/APOC3/CETP/APOA1/LIPG	5
BP	GO:0051004	regulation of lipoprotein lipase activity	5/620	0.000394197	0.0122679	APOA4/APOA5/APOC3/APOA1/GPIHBP1	5
BP	GO:0055090	acylglycerol homeostasis	7/620	0.000405159	0.0124208	APOA4/APOA5/APOC3/DGAT2/CETP/APOA1/GPIHBP1	7
BP	GO:0070328	triglyceride homeostasis	7/620	0.000405159	0.0124208	APOA4/APOA5/APOC3/DGAT2/CETP/APOA1/GPIHBP1	7
BP	GO:0021510	spinal cord development	11/620	0.000417636	0.0127085	RFX4/WNT3A/NKX2-2/GDF7/ISL1/MDGA2/PBX3/TAL1/PHOX2A/PROX1/SLIT1	11
BP	GO:0062012	regulation of small molecule metabolic process	24/620	0.000447484	0.0135167	APOA4/APOA5/APOC3/SLC4A4/GCK/DGAT2/GAPDHS/KIT/AVPR1A/WNT4/APOA1/NOS1/SLC4A1/PASK/PPARGC1A/SLC27A4/PDK4/TFF3/PLA2G3/LHCGR/ADCYAP1R1/PROX1/PFKFB1/PDZD3	24
BP	GO:0045987	positive regulation of smooth muscle contraction	6/620	0.000457148	0.0137078	SPX/KIT/TACR3/CHRM3/ADRA2B/TBXA2R	6
BP	GO:0050433	regulation of catecholamine secretion	8/620	0.00046998	0.0139007	CARTPT/CHRNA4/KCNA2/VIP/KCNB1/SYT3/ADRA2B/SYT15	8
BP	GO:0001709	cell fate determination	7/620	0.000470351	0.0139007	CYP26B1/TBX2/NKX2-2/ISL1/EBF2/NOTCH4/PROX1	7
BP	GO:0007194	negative regulation of adenylate cyclase activity	5/620	0.000503442	0.0146677	GALR1/ADGRV1/EDNRB/GRM3/NPR3	5
BP	GO:2000047	regulation of cell-cell adhesion mediated by cadherin	5/620	0.000503442	0.0146677	WNT3A/RGCC/VEGFA/NEXMIF/NOTCH4	5
BP	GO:0050432	catecholamine secretion	8/620	0.000531167	0.0153664	CARTPT/CHRNA4/KCNA2/VIP/KCNB1/SYT3/ADRA2B/SYT15	8
BP	GO:0048732	gland development	28/620	0.000539033	0.0154849	SFRP1/SOX3/SOSTDC1/CSMD1/TFCP2L1/HMGCS2/WNT4/TBX2/APOA1/WNT3A/DNAAF1/RAG1/TG/WNT11/GDF7/ISL1/TDGF1/NKX2-3/RXFP1/VEGFA/AR/ONECUT2/NOTCH4/UPB1/EDA/PROX1/ERBB4/ATP2C2	28
BP	GO:0060914	heart formation	6/620	0.000547123	0.0156082	WNT3A/WNT11/ISL1/TBX5/GATA5/LRP2	6
BP	GO:0045834	positive regulation of lipid metabolic process	14/620	0.00055175	0.0156316	APOA4/AGTR1/APOA5/DGAT2/KIT/AVPR1A/WNT4/APOA1/EPHA8/FLT1/PPARGC1A/PLA2G3/FGF21/VAV3	14
BP	GO:0030534	adult behavior	13/620	0.000569044	0.0160112	CARTPT/DRD1/KLHL1/CHRNA4/FGF12/SLC1A2/CNTN2/GLRA1/CNTNAP2/PBX3/SHANK2/BRS3/PREX2	13
BP	GO:0042551	neuron maturation	7/620	0.000625727	0.0174565	EDNRB/MYOC/EPHA8/VSX1/CNTN2/CNTNAP2/GLDN	7
BP	GO:0007620	copulation	5/620	0.000633973	0.0174565	SEMG1/AVPR1A/EDNRB/VIP/SLC6A4	5
BP	GO:0035812	renal sodium excretion	5/620	0.000633973	0.0174565	AGTR1/SPX/AVPR1A/EDNRB/NPPB	5
BP	GO:0022600	digestive system process	11/620	0.000637408	0.0174565	APOA4/APOA5/CD36/TFF2/SLC26A7/TFF1/APOA1/CHRM3/SLC5A1/TFF3/NPR3	11
BP	GO:0033555	multicellular organismal response to stress	9/620	0.000643912	0.0174722	NR2E1/DRD1/HMGCS2/EDNRB/P2RX3/NOS1/RAG1/THBS4/ADCYAP1R1	9
BP	GO:0098801	regulation of renal system process	6/620	0.000650271	0.0174722	AGTR1/SPX/AVPR1A/EDNRB/NPPB/CORO2B	6
BP	GO:0031644	regulation of nervous system process	13/620	0.000653835	0.0174722	CARTPT/SMR3B/CUX2/SPX/AVPR1A/EDNRB/P2RX3/FGF12/VIP/DLGAP2/GLRA1/BEGAIN/CHRNA7	13
BP	GO:0009214	cyclic nucleotide catabolic process	4/620	0.000660365	0.0174722	PDE7B/PDE10A/PDE8B/PDE2A	4
BP	GO:0033700	phospholipid efflux	4/620	0.000660365	0.0174722	APOA4/APOA5/APOC3/APOA1	4
BP	GO:0009914	hormone transport	21/620	0.000666206	0.0174722	CARTPT/BMP8A/SFRP1/AGTR1/EPHA5/GCK/EDN3/ABCC8/GALR1/TRPV6/VIP/KCNB1/PASK/ISL1/MAFA/BRSK2/SLC16A2/PLA2G3/SLC30A8/RAPGEF4/SLCO1B1	21
BP	GO:0006163	purine nucleotide metabolic process	26/620	0.000667756	0.0174722	SLC4A4/NPPC/GCK/PDE7B/DGAT2/GAPDHS/HMGCS2/NOS1/SLC4A1/PDE10A/ENO3/PPARGC1A/OGDHL/NPPB/GPAM/PDK4/SULT1A2/ELOVL2/PDE8B/LRGUK/DLG2/SULT1C4/PFKFB1/PDE2A/PDZD3/ACOT6	26
BP	GO:0007018	microtubule-based movement	26/620	0.00069319	0.0180229	SEMG1/EPPIN/KIF1A/CFAP47/TEKT4/GAPDHS/KIF19/CATSPERZ/TACR3/KIF5C/DNAAF1/NME8/MAPT/CFAP65/AQP4/TEKT1/DNAI2/KIF5A/SLC26A8/HAP1/PLA2G3/TNP1/DLG2/DNAAF6/TRIM58/KIF6	26
BP	GO:0030317	flagellated sperm motility	12/620	0.000710347	0.0182382	SEMG1/EPPIN/CFAP47/GAPDHS/CATSPERZ/TACR3/NME8/CFAP65/SLC26A8/PLA2G3/TNP1/DNAAF6	12
BP	GO:0097722	sperm motility	12/620	0.000710347	0.0182382	SEMG1/EPPIN/CFAP47/GAPDHS/CATSPERZ/TACR3/NME8/CFAP65/SLC26A8/PLA2G3/TNP1/DNAAF6	12
BP	GO:2000241	regulation of reproductive process	15/620	0.000749943	0.0190401	SFRP1/SEMG1/NOX5/EPPIN/STRA8/NPPC/TACR3/WNT4/EDNRB/VIP/PIWIL2/GLRA1/ZP1/VEGFA/AR	15
BP	GO:0030900	forebrain development	25/620	0.000755226	0.0190401	NR2E1/SOX3/EPHA5/DRD1/RFX4/AVPR1A/WNT4/TBR1/WNT3A/ATP1B2/EMX1/GDF7/PRKG1/ISL1/SLC1A2/CNTN2/CDH2/CNTNAP2/KCNC1/HAP1/FOXP2/PROX1/ERBB4/LRP2/SLIT1	25
BP	GO:0060191	regulation of lipase activity	10/620	0.000755485	0.0190401	APOA4/AGTR1/APOA5/APOC3/KIT/AVPR1A/APOA1/FLT1/GPIHBP1/ADCYAP1R1	10
BP	GO:0022612	gland morphogenesis	12/620	0.000764099	0.0191131	SFRP1/SOSTDC1/CSMD1/WNT4/TBX2/WNT3A/GDF7/NKX2-3/RXFP1/AR/EDA/PROX1	12
BP	GO:0043270	positive regulation of ion transport	20/620	0.000767688	0.0191131	PLP1/DRD1/EDN3/ABCC8/AVPR1A/P2RX3/FHL1/FGF12/NOS1/ATP1B2/SCN4B/SLC6A1/RYR2/KCNC1/HAP1/PLA2G3/ADCYAP1R1/TRPC6/SLC6A4/ATP2C2	20
BP	GO:0006833	water transport	5/620	0.000788285	0.0192295	AQP7/AQP4/SLC5A1/SLC14A1/PDZD3	5
BP	GO:0045723	positive regulation of fatty acid biosynthetic process	5/620	0.000788285	0.0192295	APOA4/APOA5/AVPR1A/APOA1/PLA2G3	5
BP	GO:0090208	positive regulation of triglyceride metabolic process	5/620	0.000788285	0.0192295	APOA4/APOA5/DGAT2/APOA1/FGF21	5
BP	GO:0007411	axon guidance	18/620	0.000791089	0.0192295	SEMA3D/LRTM2/EPHA5/EDN3/TBR1/KIF5C/CNTN5/WNT3A/EPHA8/GDF7/ISL1/CNTN2/NTN3/VEGFA/KIF5A/ROBO4/UNC5D/SLIT1	18
BP	GO:0009117	nucleotide metabolic process	30/620	0.000824863	0.0199326	ENPP3/SLC4A4/NPPC/SLC5A8/GCK/PDE7B/DGAT2/GAPDHS/HMGCS2/NOS1/SLC4A1/PDE10A/ENO3/PPARGC1A/OGDHL/NPPB/GPAM/PDK4/SULT1A2/ELOVL2/PDE8B/LRGUK/UPB1/QPRT/DLG2/SULT1C4/PFKFB1/PDE2A/PDZD3/ACOT6	30
BP	GO:0097485	neuron projection guidance	18/620	0.00083112	0.0199663	SEMA3D/LRTM2/EPHA5/EDN3/TBR1/KIF5C/CNTN5/WNT3A/EPHA8/GDF7/ISL1/CNTN2/NTN3/VEGFA/KIF5A/ROBO4/UNC5D/SLIT1	18
BP	GO:0007218	neuropeptide signaling pathway	11/620	0.00087601	0.0209224	CARTPT/PPY/GALR1/PRLHR/NXPH4/QRFPR/NPY5R/GLRA2/NPPB/GLRA1/ECEL1	11
BP	GO:0010752	regulation of cGMP-mediated signaling	4/620	0.000900512	0.0209681	NPPC/PDE10A/PDE2A/PDZD3	4
BP	GO:0010872	regulation of cholesterol esterification	4/620	0.000900512	0.0209681	APOA4/AGTR1/APOA5/APOA1	4
BP	GO:0019228	neuronal action potential	6/620	0.000901214	0.0209681	DRD1/P2RX3/SCN3A/FGF12/KCNA2/SCN4A	6
BP	GO:0098810	neurotransmitter reuptake	6/620	0.000901214	0.0209681	DRD1/SLC29A4/NOS1/SLC1A2/SLC6A1/SLC6A4	6
BP	GO:0006816	calcium ion transport	27/620	0.000907678	0.0209681	PLP1/ATP2B3/SEMG1/EPPIN/DRD1/GCK/TRPM3/GRIN2C/GP9/EDNRB/P2RX3/CHRNA4/ITPR1/NOS1/WNT3A/TRPV6/CACNA2D2/CACNB4/TRPM5/RYR2/CHRNA7/HAP1/ADCYAP1R1/TRPC4/HRC/TRPC6/ATP2C2	27
BP	GO:0010876	lipid localization	28/620	0.000913295	0.0209681	APOA4/AGTR1/APOA5/CRABP1/APOC3/SLC5A8/SPX/CD36/FABP4/GALR1/DGAT2/SLC22A24/CETP/APOA1/SLC10A4/SLC4A1/LIPG/ABCG2/ABCC11/SLC27A4/ABCA8/PLA2G3/LPA/PLA2G4F/APOLD1/SLCO2A1/APOL5/SLCO1B1	28
BP	GO:0055074	calcium ion homeostasis	29/620	0.000913652	0.0209681	ATP2B3/AGTR1/DRD1/CD36/EDN3/GALR1/GRIN2C/SCGN/GP9/AVPR1A/EDNRB/P2RX3/ITPR1/NOS1/GLP1R/TRPV6/KDR/RYR2/CHRNA7/GPR17/HAP1/CTRC/ADCYAP1R1/TRPC4/HRC/TRPC6/TBXA2R/CCL14/ATP2C2	29
BP	GO:0010959	regulation of metal ion transport	26/620	0.000928995	0.0211591	PLP1/SEMG1/KCNAB1/EPPIN/DRD1/GCK/EDN3/ABCC8/DPP6/KCNE3/P2RX3/FHL1/FGF12/NOS1/VIP/ATP1B2/CACNB4/SCN4B/RYR2/KCNC1/HAP1/ADCYAP1R1/KCNIP3/HRC/TRPC6/ATP2C2	26
BP	GO:0007632	visual behavior	7/620	0.00093228	0.0211591	TAFA2/DRD1/ABCC8/KIT/RAG1/SLC1A2/PDE1B	7
BP	GO:0050878	regulation of body fluid levels	25/620	0.0009457	0.0213458	CD36/GP9/SCUBE1/SERPIND1/CYP26B1/HSD11B2/EDNRB/WNT3A/VIP/SLC4A1/DGKI/PRKG1/AQP4/CHRM3/NPPB/ADRA2B/DGKB/CORO2B/VEGFA/PEAR1/F11/NPR3/VAV3/ERBB4/TBXA2R	25
BP	GO:0098657	import into cell	18/620	0.000961787	0.0215163	KCNJ13/DRD1/SPX/KCNJ3/CD36/SLC29A4/NOS1/TRPV6/ATP1B2/SLC1A2/SLC27A4/SLC6A1/SLC5A1/SLC16A2/SLC39A12/SLC6A4/LRP2/SLC43A1	18
BP	GO:0035162	embryonic hemopoiesis	5/620	0.000968966	0.0215163	TPO/KIT/KDR/TAL1/VEGFA	5
BP	GO:0044062	regulation of excretion	5/620	0.000968966	0.0215163	AGTR1/SPX/AVPR1A/EDNRB/NPPB	5
BP	GO:0009259	ribonucleotide metabolic process	25/620	0.00101784	0.0224801	SLC4A4/NPPC/GCK/PDE7B/DGAT2/GAPDHS/HMGCS2/SLC4A1/PDE10A/ENO3/PPARGC1A/OGDHL/NPPB/GPAM/PDK4/SULT1A2/ELOVL2/PDE8B/LRGUK/UPB1/DLG2/SULT1C4/PFKFB1/PDE2A/ACOT6	25
BP	GO:0007612	learning	13/620	0.00103921	0.0228292	TAFA2/DRD1/BCHE/CSMD1/ABCC8/KIT/TBR1/RAG1/SLC6A1/CNTN2/CNTNAP2/SHANK2/PDE1B	13
BP	GO:0048854	brain morphogenesis	6/620	0.0010517	0.0229791	CTNNA2/EMX1/GDF7/CDH2/SLC6A4/SLIT1	6
BP	GO:0042304	regulation of fatty acid biosynthetic process	7/620	0.00105722	0.0229791	APOA4/APOA5/APOC3/AVPR1A/APOA1/PDK4/PLA2G3	7
BP	GO:0006753	nucleoside phosphate metabolic process	30/620	0.00106712	0.0230722	ENPP3/SLC4A4/NPPC/SLC5A8/GCK/PDE7B/DGAT2/GAPDHS/HMGCS2/NOS1/SLC4A1/PDE10A/ENO3/PPARGC1A/OGDHL/NPPB/GPAM/PDK4/SULT1A2/ELOVL2/PDE8B/LRGUK/UPB1/QPRT/DLG2/SULT1C4/PFKFB1/PDE2A/PDZD3/ACOT6	30
BP	GO:0046879	hormone secretion	20/620	0.0010948	0.0235468	CARTPT/BMP8A/SFRP1/AGTR1/EPHA5/GCK/EDN3/ABCC8/GALR1/TRPV6/VIP/KCNB1/PASK/ISL1/MAFA/BRSK2/SLC16A2/PLA2G3/SLC30A8/RAPGEF4	20
BP	GO:0009150	purine ribonucleotide metabolic process	24/620	0.00115459	0.0247034	SLC4A4/NPPC/GCK/PDE7B/DGAT2/GAPDHS/HMGCS2/SLC4A1/PDE10A/ENO3/PPARGC1A/OGDHL/NPPB/GPAM/PDK4/SULT1A2/ELOVL2/PDE8B/LRGUK/DLG2/SULT1C4/PFKFB1/PDE2A/ACOT6	24
BP	GO:0019933	cAMP-mediated signaling	7/620	0.00119493	0.0253284	EPHA5/PDE7B/GLP1R/RNF157/ADCYAP1R1/GNAI1/PDE2A	7
BP	GO:0055091	phospholipid homeostasis	4/620	0.00119613	0.0253284	CETP/APOA1/LIPG/GPAM	4
BP	GO:0006874	cellular calcium ion homeostasis	28/620	0.001274	0.026839	ATP2B3/AGTR1/DRD1/CD36/EDN3/GALR1/GRIN2C/SCGN/GP9/AVPR1A/EDNRB/P2RX3/ITPR1/NOS1/GLP1R/TRPV6/RYR2/CHRNA7/GPR17/HAP1/CTRC/ADCYAP1R1/TRPC4/HRC/TRPC6/TBXA2R/CCL14/ATP2C2	28
BP	GO:0048645	animal organ formation	8/620	0.00128875	0.0270112	TBR1/WNT3A/WNT11/ISL1/TBX5/GATA5/AR/LRP2	8
BP	GO:0021515	cell differentiation in spinal cord	7/620	0.00134631	0.0280744	WNT3A/NKX2-2/GDF7/ISL1/MDGA2/TAL1/PHOX2A	7
BP	GO:0003014	renal system process	11/620	0.00136889	0.0284009	AGTR1/SPX/AVPR1A/HSD11B2/EDNRB/SLC4A1/ABCG2/AQP4/NPPB/CORO2B/NPR3	11
[truncated: 408 more rows]

## Sheet: File Information
The list of differentially expressed genes (DEGs) related to BTNL9 and results of functional enrichment analysis (p<0.05 and -1<Log2FC<1).
[truncated: 1 more rows]
