# Supplementary material for: Comprehensive analysis of BTNL9 as a prognostic biomarker correlated with immune infiltrations in thyroid cancer
Source: BMC Med Genomics. 2023 Oct 5;16:234. doi: 10.1186/s12920-023-01676-8 (PMC10552425; doi:10.1186/s12920-023-01676-8)
Supplement: Supplementary file 3 — Supplementary Material 3 [file 12920_2023_1676_MOESM3_ESM.xlsx]

## Sheet: Cox RiskScore of BTNL9
sample_id	event	time	BTNL9	RiskScore
TCGA-4C-A93U-01A-11R-A39I-07	0	129	Low	1.60507
TCGA-BJ-A0YZ-01A-11R-A10U-07	0	754	High	0
TCGA-BJ-A0Z0-01A-11R-A10U-07	0	419	High	0
TCGA-BJ-A0Z2-01A-11R-A10U-07	1	158	Low	1.35865
TCGA-BJ-A0Z3-01A-11R-A13Y-07	0	497	Low	0.658232
TCGA-BJ-A0Z5-01A-11R-A10U-07	0	448	Low
TCGA-BJ-A0Z9-01A-11R-A10U-07	0	1257	Low	1.60507
TCGA-BJ-A0ZA-01A-11R-A10U-07	0	574	High	0
TCGA-BJ-A0ZB-01A-11R-A10U-07	0	122	Low	1.60507
TCGA-BJ-A0ZC-01A-12R-A13Y-07	0	352	High	0
TCGA-BJ-A0ZE-01A-11R-A10U-07	0	509	Low	1.60507
TCGA-BJ-A0ZF-01A-11R-A10U-07	1	735	High	0
TCGA-BJ-A0ZG-01A-11R-A10U-07	0	775	High	0
TCGA-BJ-A0ZH-01A-11R-A10U-07	0	460	High	0.700418
TCGA-BJ-A0ZJ-01A-11R-A10U-07	0	1280	High	0
TCGA-BJ-A18Y-01A-11R-A13Y-07	0	1563	High	0
TCGA-BJ-A18Z-01A-21R-A13Y-07	0	1263	Low	1.60507
TCGA-BJ-A190-01A-11R-A13Y-07	0	626	High	0
TCGA-BJ-A191-01A-11R-A13Y-07	0	147	High	0
TCGA-BJ-A192-01A-31R-A13Y-07	0	1349	Low	1.60507
TCGA-BJ-A28R-01A-11R-A16R-07	0	1282	Low
TCGA-BJ-A28S-01A-11R-A19O-07	0	640	High
TCGA-BJ-A28T-01A-11R-A16R-07	0	1081	Low
TCGA-BJ-A28V-01A-11R-A19O-07	0	987	High
TCGA-BJ-A28W-01A-11R-A32Y-07	0	344	Low
TCGA-BJ-A28X-01A-11R-A22L-07	1	494	Low	0.904653
TCGA-BJ-A28Z-01A-11R-A16R-07	0	337	Low	1.60507
TCGA-BJ-A290-01A-11R-A180-07	1	329	High	0.946839
TCGA-BJ-A291-01A-11R-A16R-07	0	696	High
TCGA-BJ-A2N7-01A-11R-A18C-07	0	559	High	0.246421
TCGA-BJ-A2N8-01A-11R-A18C-07	0	504	High
TCGA-BJ-A2N9-01A-11R-A18C-07	1	225	Low	0.658232
TCGA-BJ-A2NA-01A-12R-A19O-07	1	127	Low	1.60507
TCGA-BJ-A2P4-01A-11R-A18C-07	0	390	High
TCGA-BJ-A3EZ-01A-11R-A206-07	0	487	Low	1.60507
TCGA-BJ-A3F0-01A-11R-A206-07	0	424	High	0
TCGA-BJ-A3PR-01A-11R-A220-07	0	1107	Low	0.658232
TCGA-BJ-A3PT-01A-12R-A220-07	0	709	High
TCGA-BJ-A3PU-01A-11R-A220-07	1	174	Low	1.60507
TCGA-BJ-A45C-01A-11R-A23W-07	1	243	High	0.946839
TCGA-BJ-A45D-01A-11R-A23W-07	0	331	High	0
TCGA-BJ-A45E-01A-11R-A32Y-07	0	639	Low
TCGA-BJ-A45F-01A-12R-A23W-07	0	105	High
TCGA-BJ-A45G-01A-11R-A23W-07	0	725	High	0.700418
TCGA-BJ-A45H-01A-12R-A23W-07	0	865	Low	1.60507
TCGA-BJ-A45I-01A-11R-A23W-07	1	110	Low	1.60507
TCGA-BJ-A45J-01A-11R-A23W-07	0	658	High
TCGA-BJ-A45K-01A-11R-A23W-07	0	705	High	0
TCGA-BJ-A4O8-01A-11R-A250-07	0	591	Low	1.35865
TCGA-BJ-A4O9-01A-11R-A250-07	0	714	High	0
TCGA-CE-A13K-01A-11R-A10U-07	0	385	High	0.246421
TCGA-CE-A27D-01A-11R-A16R-07	0	374	Low	0.658232
TCGA-CE-A3MD-01A-11R-A20F-07	0	389	High	0
TCGA-CE-A3ME-01A-11R-A20F-07	0	379	Low	0.658232
TCGA-CE-A481-01A-21R-A23W-07	0	346	High	0
TCGA-CE-A482-01A-11R-A23W-07	0	325	High	0
TCGA-CE-A483-01A-11R-A23W-07	0	457	High	0
TCGA-CE-A484-01A-11R-A23W-07	0	378	High	0
TCGA-CE-A485-01A-11R-A23W-07	0	385	High	0
TCGA-DE-A0XZ-01A-11R-A180-07	1	204	High	0.700418
TCGA-DE-A0Y2-01A-11R-A10U-07	0	658	Low	0.658232
TCGA-DE-A0Y3-01B-11R-A10U-07	1	30	Low
TCGA-DE-A2OL-01A-11R-A18C-07	0	1145	High	0
TCGA-DE-A3KN-01A-11R-A20F-07	0	831	High	0.946839
TCGA-DE-A4M8-01A-21R-A250-07	0	564	Low	1.35865
TCGA-DE-A4M9-01A-11R-A250-07	0	573	High	0
TCGA-DE-A4MA-01A-11R-A250-07	0	916	Low	1.60507
TCGA-DE-A4MB-01A-11R-A250-07	0	352	Low	1.60507
TCGA-DE-A4MC-01A-11R-A250-07	1	332	Low	0.904653
TCGA-DE-A4MD-01A-11R-A250-07	1	267	Low	1.35865
TCGA-DE-A69J-01A-21R-A39I-07	0	447	Low	0.658232
TCGA-DE-A69K-01A-11R-A39I-07	1	434	Low	1.60507
TCGA-DE-A7U5-01A-11R-A39I-07	0	84	Low
TCGA-DJ-A13L-01A-11R-A220-07	0	303	Low	0.658232
TCGA-DJ-A13M-01A-11R-A10U-07	0	1484	High	0
TCGA-DJ-A13O-01A-11R-A10U-07	0	1161	Low	0.658232
TCGA-DJ-A13P-01A-11R-A10U-07	0	5150	High	0.246421
TCGA-DJ-A13R-01A-11R-A10U-07	0	565	Low	1.35865
TCGA-DJ-A13S-01A-11R-A10U-07	0	265	High	0
TCGA-DJ-A13T-01A-11R-A10U-07	0	1709	High	0
TCGA-DJ-A13U-01A-11R-A10U-07	0	1590	Low	1.60507
TCGA-DJ-A13V-01A-11R-A10U-07	0	1313	Low	0.904653
TCGA-DJ-A13W-01A-11R-A10U-07	0	1593	Low	0.658232
TCGA-DJ-A13X-01A-11R-A10U-07	0	253	High	0.700418
TCGA-DJ-A1QD-01A-11R-A14Y-07	0	1462	Low	0.658232
TCGA-DJ-A1QE-01A-21R-A14Y-07	0	4134	Low	1.60507
TCGA-DJ-A1QF-01A-12R-A14Y-07	0	931	High	0
TCGA-DJ-A1QG-01A-11R-A14Y-07	0	1368	High	0
TCGA-DJ-A1QH-01A-21R-A14Y-07	0	1293	Low	1.60507
TCGA-DJ-A1QI-01A-11R-A14Y-07	0	455	High	0
TCGA-DJ-A1QL-01A-11R-A14Y-07	0	535	High	0
TCGA-DJ-A1QM-01A-11R-A14Y-07	0	183	Low	0.658232
TCGA-DJ-A1QN-01A-11R-A14Y-07	0	1295	Low	0.658232
TCGA-DJ-A1QO-01A-11R-A14Y-07	1	1062	Low	1.60507
TCGA-DJ-A1QQ-01A-11R-A14Y-07	0	534	Low	0.904653
TCGA-DJ-A2PN-01A-21R-A19O-07	0	307	High	0
TCGA-DJ-A2PO-01A-21R-A19O-07	0	243	Low	0.658232
TCGA-DJ-A2PP-01A-11R-A19O-07	0	930	High	0
TCGA-DJ-A2PQ-01A-11R-A18C-07	0	1077	High	0
TCGA-DJ-A2PR-01A-11R-A19O-07	0	835	Low	0.904653
TCGA-DJ-A2PS-01A-11R-A18C-07	0	797	High	0.246421
TCGA-DJ-A2PT-01A-11R-A18C-07	0	1181	Low	1.60507
TCGA-DJ-A2PU-01A-12R-A19O-07	0	1033	High	0
TCGA-DJ-A2PV-01A-11R-A19O-07	0	973	High	0
TCGA-DJ-A2PW-01A-11R-A19O-07	0	1060	Low	1.35865
TCGA-DJ-A2PX-01A-11R-A18C-07	0	881	High	0
TCGA-DJ-A2PY-01A-11R-A18C-07	0	267	Low	1.60507
TCGA-DJ-A2PZ-01A-21R-A18C-07	0	256	Low	1.60507
TCGA-DJ-A2Q0-01A-11R-A206-07	0	1045	High	0
TCGA-DJ-A2Q1-01A-22R-A19O-07	0	1148	Low	0.658232
TCGA-DJ-A2Q2-01A-11R-A19O-07	0	1337	High	0.700418
TCGA-DJ-A2Q3-01A-11R-A18C-07	1	385	Low	1.60507
TCGA-DJ-A2Q4-01A-21R-A18C-07	0	1032	Low	1.35865
TCGA-DJ-A2Q5-01A-11R-A18C-07	0	1140	High	0.700418
TCGA-DJ-A2Q6-01A-11R-A18C-07	0	1109	High	0.246421
TCGA-DJ-A2Q7-01A-11R-A18C-07	0	1068	High	0.946839
TCGA-DJ-A2Q9-01A-21R-A18C-07	0	1092	Low	1.35865
TCGA-DJ-A2QA-01A-11R-A18C-07	0	1020	Low	1.60507
TCGA-DJ-A2QB-01A-11R-A19O-07	0	1070	High	0.946839
TCGA-DJ-A2QC-01A-11R-A18C-07	0	1215	High	0
TCGA-DJ-A3UK-01A-11R-A22L-07	0	1123	High	0
TCGA-DJ-A3UM-01A-11R-A22L-07	0	944	Low	0.658232
TCGA-DJ-A3UN-01A-11R-A22L-07	0	986	High	0
TCGA-DJ-A3UO-01A-11R-A22L-07	1	641	Low	1.60507
TCGA-DJ-A3UP-01A-11R-A22L-07	0	499	High	0
TCGA-DJ-A3UQ-01A-11R-A22L-07	0	595	Low	1.60507
TCGA-DJ-A3UR-01A-11R-A22L-07	0	1105	High	0.946839
TCGA-DJ-A3US-01A-11R-A22L-07	0	998	High	0
TCGA-DJ-A3UT-01A-11R-A22L-07	0	1105	High	0
TCGA-DJ-A3UU-01A-11R-A22L-07	0	713	High	0.946839
TCGA-DJ-A3UV-01A-11R-A22L-07	0	1466	High	0
TCGA-DJ-A3UW-01A-11R-A22L-07	0	1812	Low	0.658232
TCGA-DJ-A3UX-01A-11R-A22L-07	0	345	Low	0.658232
TCGA-DJ-A3UY-01A-21R-A22L-07	0	1091	Low	0.658232
TCGA-DJ-A3UZ-01A-11R-A22U-07	0	1246	High	0.946839
TCGA-DJ-A3V0-01A-11R-A22U-07	0	1125	Low	1.60507
TCGA-DJ-A3V2-01A-11R-A22U-07	0	615	High	0
TCGA-DJ-A3V3-01A-11R-A22U-07	0	931	High	0
TCGA-DJ-A3V4-01A-11R-A22U-07	0	1294	High	0.946839
TCGA-DJ-A3V5-01A-11R-A22U-07	0	584	Low	1.60507
TCGA-DJ-A3V6-01A-11R-A22U-07	0	818	Low	1.60507
TCGA-DJ-A3V7-01A-11R-A23N-07	0	706	Low	1.60507
TCGA-DJ-A3V8-01A-11R-A23N-07	0	647	Low	0.904653
TCGA-DJ-A3V9-01A-11R-A23N-07	0	623	High	0.700418
TCGA-DJ-A3VA-01A-11R-A23N-07	0	755	High	0
TCGA-DJ-A3VB-01A-11R-A23N-07	0	697	Low	1.60507
TCGA-DJ-A3VD-01A-11R-A23N-07	0	1238	Low	0.658232
TCGA-DJ-A3VE-01A-11R-A23N-07	0	577	High	0
TCGA-DJ-A3VF-01A-11R-A23N-07	0	292	Low	1.60507
TCGA-DJ-A3VG-01A-11R-A23N-07	0	1085	High	0
TCGA-DJ-A3VI-01A-11R-A23N-07	0	95	Low	1.35865
TCGA-DJ-A3VJ-01A-11R-A23N-07	0	1108	Low	0.904653
TCGA-DJ-A3VK-01A-11R-A23N-07	0	753	High	0.946839
TCGA-DJ-A3VL-01A-11R-A23N-07	1	411	High	0
TCGA-DJ-A3VM-01A-11R-A23N-07	0	840	High	0
TCGA-DJ-A4UL-01A-11R-A250-07	0	939	High	0
TCGA-DJ-A4UP-01A-11R-A250-07	0	916	High	0
TCGA-DJ-A4UQ-01A-11R-A250-07	0	1005	High	0.946839
TCGA-DJ-A4UR-01A-11R-A250-07	1	113	High	0.246421
TCGA-DJ-A4UT-01A-11R-A250-07	0	823	Low	0.658232
TCGA-DJ-A4UW-01A-11R-A250-07	0	819	High	0
TCGA-DJ-A4V0-01A-11R-A250-07	0	1081	High	0
TCGA-DJ-A4V2-01A-11R-A250-07	0	95	Low	0.658232
TCGA-DJ-A4V4-01A-11R-A250-07	0	481	Low	0.658232
TCGA-DJ-A4V5-01A-11R-A250-07	0	1076	High	0.946839
TCGA-DO-A1JZ-01A-11R-A13Y-07	0	1670	Low	0.658232
TCGA-DO-A1K0-01A-11R-A13Y-07	1	577	Low	0.904653
TCGA-DO-A2HM-01B-11R-A22L-07	0	71	High	0.700418
TCGA-E3-A3DY-01A-11R-A20F-07	0	2815	High	0
TCGA-E3-A3DZ-01A-11R-A20F-07	0	1436	High	0.700418
TCGA-E3-A3E0-01A-11R-A20F-07	0	2019	High	0
TCGA-E3-A3E1-01A-11R-A20F-07	0	2449	Low	0.658232
TCGA-E3-A3E2-01A-11R-A20F-07	0	1922	High	0
TCGA-E3-A3E3-01A-11R-A20F-07	1	445	Low	0.658232
TCGA-E3-A3E5-01A-11R-A20F-07	0	1215	High	0.700418
TCGA-E8-A242-01A-21R-A16R-07	0	950	Low	1.60507
TCGA-E8-A2EA-01A-11R-A180-07	0	1085	Low	0.658232
TCGA-E8-A2JQ-01A-11R-A180-07	0	356	Low	0.904653
TCGA-E8-A3X7-01A-11R-A22U-07	0	951	Low	1.60507
TCGA-E8-A413-01A-21R-A23N-07	0	912	Low	0.658232
TCGA-E8-A414-01A-11R-A23N-07	0	958	Low	1.35865
TCGA-E8-A415-01A-11R-A23N-07	0	944	Low	0.658232
TCGA-E8-A416-01A-11R-A23N-07	0	952	High	0
TCGA-E8-A417-01A-21R-A23N-07	0	938	Low	0.658232
TCGA-E8-A418-01A-11R-A23N-07	0	92	Low	1.60507
TCGA-E8-A419-01A-11R-A23N-07	0	774	Low	0.658232
TCGA-E8-A432-01A-11R-A23N-07	1	720	High	0
TCGA-E8-A433-01A-11R-A23N-07	0	951	Low	0.658232
TCGA-E8-A434-01A-11R-A23N-07	0	953	High	0
TCGA-E8-A436-01A-12R-A23W-07	0	455	Low	1.35865
TCGA-E8-A437-01A-12R-A23W-07	0	1213	High	0
TCGA-E8-A438-01A-11R-A23W-07	0	1019	High	0
TCGA-E8-A44K-01A-21R-A23W-07	0	943	Low	0.658232
TCGA-E8-A44M-01A-21R-A23W-07	0	917	Low	0.658232
TCGA-EL-A3CL-01A-11R-A19O-07	0	963	High	0
TCGA-EL-A3CM-01A-11R-A19O-07	0	813	Low	1.60507
TCGA-EL-A3CN-01A-12R-A20F-07	0	4731	Low	0.904653
TCGA-EL-A3CO-01A-11R-A19O-07	0	2973	High	0.946839
TCGA-EL-A3CP-01A-11R-A19O-07	0	4831	Low
TCGA-EL-A3CR-01A-12R-A206-07	0	233	Low	1.60507
TCGA-EL-A3CS-01A-21R-A19O-07	1	1385	Low	1.60507
TCGA-EL-A3CT-01A-12R-A206-07	0	1854	Low	1.60507
TCGA-EL-A3CU-01A-11R-A19O-07	0	4780	Low	1.35865
TCGA-EL-A3CV-01A-11R-A19O-07	0	1154	Low	0.904653
TCGA-EL-A3CW-01A-11R-A19O-07	0	1734	Low	1.35865
TCGA-EL-A3CX-01A-11R-A19O-07	0	3243	Low	0.658232
TCGA-EL-A3CY-01A-11R-A19O-07	0	127	High	0
TCGA-EL-A3CZ-01A-11R-A19O-07	1	1426	High	0
TCGA-EL-A3D0-01A-12R-A206-07	0	4254	High	0.946839
TCGA-EL-A3D1-01A-11R-A19O-07	0	2997	Low	0.658232
TCGA-EL-A3D4-01A-11R-A19O-07	0	2116	High	0.946839
TCGA-EL-A3D5-01A-22R-A206-07	0	1737	High	0.246421
TCGA-EL-A3D6-01A-12R-A206-07	0	3296	Low	1.60507
TCGA-EL-A3GO-01A-11R-A206-07	1	6	High	0
TCGA-EL-A3GP-01A-11R-A206-07	0	1506	Low	1.60507
TCGA-EL-A3GQ-01A-11R-A206-07	0	1528	High	0
TCGA-EL-A3GR-01A-21R-A206-07	0	3501	Low	0.904653
TCGA-EL-A3GS-01A-11R-A20F-07	0	1989	Low	0.904653
TCGA-EL-A3GU-01A-11R-A21D-07	1	544	Low	1.60507
TCGA-EL-A3GV-01A-11R-A21D-07	0	1532	Low	1.60507
TCGA-EL-A3GW-01A-11R-A206-07	0	1527	High	0
TCGA-EL-A3GX-01A-11R-A206-07	1	439	Low	0.658232
TCGA-EL-A3GY-01A-21R-A206-07	0	3076	Low	0.658232
TCGA-EL-A3GZ-01A-11R-A20F-07	0	4258	Low	0.658232
TCGA-EL-A3H1-01A-11R-A21D-07	0	1500	High	0
TCGA-EL-A3H2-01A-11R-A20F-07	1	1019	High	0
TCGA-EL-A3H3-01A-11R-A206-07	0	1319	Low	0.658232
TCGA-EL-A3H4-01A-11R-A206-07	0	1512	Low	1.60507
TCGA-EL-A3H5-01A-11R-A206-07	0	2542	Low	1.60507
TCGA-EL-A3H7-01A-11R-A21D-07	0	4228	Low	0.904653
TCGA-EL-A3H8-01A-11R-A20F-07	0	4577	High	0.246421
TCGA-EL-A3MW-01A-11R-A20F-07	0	3305	High	0
TCGA-EL-A3MX-01A-11R-A21D-07	1	1708	Low	1.35865
TCGA-EL-A3MY-01A-11R-A21D-07	1	533	Low	1.60507
TCGA-EL-A3MZ-01A-11R-A21D-07	0	1597	Low	1.60507
TCGA-EL-A3N2-01A-11R-A20F-07	0	902	Low	0.904653
TCGA-EL-A3N3-01A-11R-A20F-07	0	5423	Low	0.904653
TCGA-EL-A3T0-01A-22R-A22L-07	0	4335	High	0.946839
TCGA-EL-A3T1-01A-11R-A22L-07	0	3941	Low	0.904653
TCGA-EL-A3T2-01A-11R-A22L-07	1	903	High	0.700418
TCGA-EL-A3T3-01A-11R-A22L-07	0	4017	Low	0.658232
TCGA-EL-A3T6-01A-11R-A220-07	0	2988	Low	0.658232
TCGA-EL-A3T7-01A-11R-A22L-07	0	1256	Low	0.904653
TCGA-EL-A3T8-01A-21R-A22L-07	0	3269	High	0
TCGA-EL-A3T9-01A-21R-A22L-07	1	174	Low	1.60507
TCGA-EL-A3TA-01A-12R-A22L-07	0	2035	High	0
TCGA-EL-A3TB-01A-11R-A22L-07	0	2519	High	0.946839
TCGA-EL-A3ZG-01A-11R-A23N-07	0	2724	High	0.246421
TCGA-EL-A3ZH-01A-31R-A23N-07	0	2773	High	0.246421
TCGA-EL-A3ZK-01A-21R-A23N-07	0	1575	Low	0.658232
TCGA-EL-A3ZL-01A-11R-A23N-07	0	1895	High	0
TCGA-EL-A3ZM-01A-12R-A23N-07	0	1096	Low	1.60507
TCGA-EL-A3ZN-01A-11R-A23N-07	0	1614	High	0.246421
TCGA-EL-A3ZO-01A-11R-A23N-07	0	2211	Low	1.60507
TCGA-EL-A3ZP-01A-11R-A23N-07	0	1992	Low	0.904653
TCGA-EL-A3ZQ-01A-11R-A23N-07	0	1862	Low	0.658232
TCGA-EL-A3ZR-01A-11R-A23N-07	0	1830	High	0
TCGA-EL-A3ZS-01A-12R-A23N-07	0	215	High	0
TCGA-EL-A3ZT-01A-12R-A23N-07	0	1808	High	0.246421
TCGA-EL-A4JV-01A-11R-A250-07	0	1748	High	0
TCGA-EL-A4JW-01A-11R-A250-07	0	1056	Low	0.658232
TCGA-EL-A4JX-01A-12R-A250-07	0	1398	Low	0.658232
TCGA-EL-A4JZ-01A-11R-A250-07	0	1856	High	0.946839
TCGA-EL-A4K0-01A-11R-A250-07	0	944	Low	0.658232
TCGA-EL-A4K1-01A-11R-A250-07	0	1046	Low	1.35865
TCGA-EL-A4K2-01A-11R-A250-07	0	928	High	0
TCGA-EL-A4K4-01A-11R-A250-07	0	1623	Low	0.904653
TCGA-EL-A4K6-01A-12R-A250-07	1	874	Low	1.60507
TCGA-EL-A4K7-01A-11R-A250-07	0	1251	Low	1.60507
TCGA-EL-A4K9-01A-11R-A250-07	0	1455	High	0.246421
TCGA-EL-A4KD-01A-11R-A250-07	0	1326	High	0.246421
TCGA-EL-A4KG-01A-11R-A250-07	0	739	Low	0.904653
TCGA-EL-A4KH-01A-11R-A250-07	0	823	High	0
TCGA-EL-A4KI-01A-11R-A250-07	1	265	High	0.946839
TCGA-EM-A1CS-01A-11R-A13Y-07	0	817	High	0
TCGA-EM-A1CT-01A-11R-A13Y-07	0	553	Low	1.35865
TCGA-EM-A1CU-01A-11R-A13Y-07	0	636	Low	0.658232
TCGA-EM-A1CV-01A-11R-A13Y-07	0	1475	High	0
TCGA-EM-A1CW-01A-21R-A13Y-07	0	549	Low	0.658232
TCGA-EM-A1YA-01A-11R-A14Y-07	0	602	High	0
TCGA-EM-A1YB-01A-11R-A14Y-07	0	592	High	0
TCGA-EM-A1YC-01A-11R-A14Y-07	0	2391	Low	1.35865
TCGA-EM-A1YD-01A-11R-A14Y-07	0	1734	High	0
TCGA-EM-A1YE-01A-11R-A14Y-07	0	1645	High	0
TCGA-EM-A22I-01A-11R-A180-07	0	448	Low	1.60507
TCGA-EM-A22J-01A-11R-A180-07	0	441	High	0
TCGA-EM-A22K-01A-11R-A180-07	0	479	High	0.700418
TCGA-EM-A22L-01A-11R-A180-07	0	318	High	0
TCGA-EM-A22M-01A-11R-A32Y-07	0	442	Low	0.658232
TCGA-EM-A22N-01A-11R-A180-07	0	324	High	0
TCGA-EM-A22O-01A-11R-A180-07	0	1344	High	0.946839
TCGA-EM-A22P-01A-11R-A19O-07	0	1256	High	0.700418
TCGA-EM-A22Q-01A-11R-A180-07	0	433	High	0
TCGA-EM-A2CJ-01A-11R-A180-07	0	1447	High	0
TCGA-EM-A2CK-01A-11R-A180-07	0	544	High	0
TCGA-EM-A2CL-01A-11R-A180-07	0	401	High	0
TCGA-EM-A2CM-01A-11R-A180-07	0	1253	High	0.700418
TCGA-EM-A2CN-01A-11R-A19O-07	0	715	Low	1.35865
TCGA-EM-A2CO-01A-11R-A19O-07	0	184	Low	0.658232
TCGA-EM-A2CP-01A-11R-A180-07	0	91	High	0
TCGA-EM-A2CQ-01A-11R-A180-07	0	374	High	0
TCGA-EM-A2CR-01A-11R-A180-07	0	415	Low	0.658232
TCGA-EM-A2CS-01A-11R-A180-07	0	841	High	0.700418
TCGA-EM-A2CT-01A-11R-A180-07	0	1474	High	0
TCGA-EM-A2CU-01A-12R-A180-07	0	400	High	0.700418
TCGA-EM-A2OV-01A-11R-A206-07	0	674	High	0
TCGA-EM-A2OW-01A-11R-A206-07	0	1227	High	0
TCGA-EM-A2OX-01A-11R-A206-07	0	600	High	0.700418
TCGA-EM-A2OY-01A-11R-A206-07	0	983	High	0
TCGA-EM-A2OZ-01A-11R-A206-07	0	1033	High	0
TCGA-EM-A2P0-01A-11R-A206-07	0	535	High	0
TCGA-EM-A2P1-01A-11R-A206-07	1	363	Low	0.658232
TCGA-EM-A2P2-01A-11R-A206-07	0	526	High	0.700418
TCGA-EM-A2P3-01A-11R-A206-07	0	444	Low	0.658232
TCGA-EM-A3AI-01A-11R-A206-07	0	685	High	0
TCGA-EM-A3AJ-01A-11R-A206-07	0	941	High	0
TCGA-EM-A3AK-01A-11R-A206-07	0	477	High	0
TCGA-EM-A3AL-01A-11R-A206-07	0	430	High	0
TCGA-EM-A3AN-01A-11R-A206-07	0	1006	Low	0.658232
TCGA-EM-A3AO-01A-11R-A206-07	0	1354	High	0.700418
TCGA-EM-A3AP-01A-12R-A20F-07	0	254	High	0
TCGA-EM-A3AQ-01A-11R-A20F-07	0	904	High	0
TCGA-EM-A3AR-01A-12R-A20F-07	0	1133	Low	0.658232
TCGA-EM-A3FJ-01A-11R-A21D-07	0	850	High	0
TCGA-EM-A3FK-01A-11R-A21D-07	0	723	Low	0.658232
TCGA-EM-A3FL-01A-11R-A21D-07	0	1441	High	0
TCGA-EM-A3FM-01A-11R-A21D-07	1	514	Low	1.35865
TCGA-EM-A3FN-01A-11R-A21D-07	0	367	High	0
TCGA-EM-A3FO-01A-11R-A21D-07	0	532	Low	0.658232
TCGA-EM-A3FP-01A-11R-A21D-07	0	529	High	0
TCGA-EM-A3FQ-01A-11R-A21D-07	0	492	Low	0.658232
TCGA-EM-A3FR-01A-11R-A220-07	0	457	High	0.700418
TCGA-EM-A3O3-01A-11R-A220-07	0	441	Low	1.35865
TCGA-EM-A3O6-01A-11R-A220-07	0	458	High	0
TCGA-EM-A3O7-01A-11R-A220-07	0	223	High	0.700418
TCGA-EM-A3O8-01A-11R-A220-07	0	381	High	0
TCGA-EM-A3OA-01A-11R-A220-07	0	822	High	0
TCGA-EM-A3OB-01A-11R-A220-07	0	1176	High	0
TCGA-EM-A3ST-01A-11R-A22U-07	1	966	High	0.700418
TCGA-EM-A3SU-01A-11R-A22U-07	0	911	Low	0.658232
TCGA-EM-A3SX-01A-11R-A22U-07	0	908	High	0
TCGA-EM-A3SY-01A-11R-A22U-07	0	411	Low	0.658232
TCGA-EM-A3SZ-01A-11R-A22U-07	0	389	Low	0.658232
TCGA-EM-A4FF-01A-11R-A250-07	1	1785	Low	0.658232
TCGA-EM-A4FH-01A-11R-A250-07	0	892	High	0.700418
TCGA-EM-A4FK-01A-11R-A250-07	0	649	High	0
TCGA-EM-A4FM-01A-11R-A250-07	0	162	Low	1.60507
TCGA-EM-A4FN-01A-11R-A250-07	0	802	Low	1.35865
TCGA-EM-A4FO-01A-11R-A250-07	0	802	High	0
TCGA-EM-A4FQ-01A-11R-A250-07	0	683	Low	0.658232
TCGA-EM-A4FR-01A-11R-A250-07	0	655	High	0
TCGA-EM-A4FU-01A-11R-A250-07	1	781	High	0
TCGA-EM-A4FV-01A-11R-A250-07	0	744	High	0
TCGA-EM-A4G1-01A-11R-A250-07	0	416	Low	0.658232
TCGA-ET-A25G-01A-11R-A16R-07	0	2492	Low	1.60507
TCGA-ET-A25I-01A-11R-A16R-07	0	2485	High	0
TCGA-ET-A25J-01A-11R-A16R-07	0	2359	Low	0.658232
TCGA-ET-A25K-01A-11R-A16R-07	0	2142	High	0
TCGA-ET-A25L-01A-11R-A16R-07	0	1721	Low	1.60507
TCGA-ET-A25M-01A-11R-A16R-07	0	1831	Low	0.658232
TCGA-ET-A25N-01A-11R-A16R-07	0	1928	Low	0.658232
TCGA-ET-A25O-01A-11R-A16R-07	0	1986	Low	0.658232
TCGA-ET-A25P-01A-11R-A16R-07	0	559	High	0
TCGA-ET-A25R-01A-11R-A16R-07	0	1930	Low	1.60507
TCGA-ET-A2MX-01A-11R-A23N-07	0	2689	Low	0.658232
TCGA-ET-A2MY-01A-11R-A18C-07	0	1787	Low	0.658232
TCGA-ET-A2MZ-01A-12R-A19O-07	0	1133	High	0
TCGA-ET-A2N0-01A-11R-A18C-07	0	1600	Low	1.35865
TCGA-ET-A2N3-01B-21R-A23N-07	0	2535	High	0
TCGA-ET-A2N4-01A-12R-A19O-07	0	81	High	0.946839
TCGA-ET-A2N5-01A-11R-A18C-07	0	2460	High	0.946839
TCGA-ET-A39I-01A-11R-A19O-07	0	1011	High	0
TCGA-ET-A39J-01A-11R-A19O-07	0	3227	High	0
TCGA-ET-A39K-01A-11R-A19O-07	1	711	Low	1.60507
TCGA-ET-A39L-01A-12R-A19O-07	0	3299	High	0
TCGA-ET-A39M-01A-11R-A19O-07	0	2582	Low	0.658232
TCGA-ET-A39N-01A-11R-A19O-07	0	3751	High	0
TCGA-ET-A39O-01A-11R-A19O-07	0	3059	Low	0.658232
TCGA-ET-A39P-01A-21R-A19O-07	0	2900	Low	1.60507
TCGA-ET-A39R-01A-11R-A19O-07	0	2863	Low	0.658232
TCGA-ET-A39S-01A-11R-A19O-07	0	1676	High	0
TCGA-ET-A39T-01A-11R-A19O-07	0	2987	Low	1.60507
TCGA-ET-A3BN-01A-11R-A19O-07	0	859	Low	0.658232
TCGA-ET-A3BO-01A-11R-A19O-07	0	1533	Low	0.904653
TCGA-ET-A3BP-01A-21R-A19O-07	0	2406	High	0
TCGA-ET-A3BQ-01B-11R-A206-07	0	2331	High	0
TCGA-ET-A3BS-01A-11R-A206-07	0	176	Low	0.904653
TCGA-ET-A3BT-01A-11R-A19O-07	1	267	Low	1.35865
TCGA-ET-A3BU-01A-11R-A19O-07	0	2367	Low	0.658232
TCGA-ET-A3BV-01A-11R-A19O-07	1	1204	Low	1.35865
TCGA-ET-A3BW-01A-11R-A19O-07	0	1419	High	0
TCGA-ET-A3BX-01A-11R-A19O-07	0	1596	Low	0.904653
TCGA-ET-A3DO-01A-11R-A19O-07	1	570	Low	0.658232
TCGA-ET-A3DP-01A-11R-A21D-07	0	2877	Low	0.658232
TCGA-ET-A3DQ-01A-11R-A19O-07	0	2581	High	0
TCGA-ET-A3DR-01A-11R-A19O-07	0	2451	Low	0.658232
TCGA-ET-A3DS-01A-11R-A19O-07	0	2033	High	0
TCGA-ET-A3DT-01A-11R-A19O-07	0	1330	Low	0.658232
TCGA-ET-A3DU-01A-11R-A19O-07	0	1911	Low	0.658232
TCGA-ET-A3DV-01A-12R-A206-07	0	5068	High	0.246421
TCGA-ET-A3DW-01A-11R-A19O-07	0	752	Low	1.35865
TCGA-ET-A40P-01A-11R-A23N-07	0	1338	High	0
TCGA-ET-A40Q-01A-11R-A23N-07	1	218	Low	0.904653
TCGA-ET-A40R-01A-11R-A23N-07	0	1350	High	0
TCGA-ET-A40S-01A-11R-A23N-07	0	1223	Low	0.658232
TCGA-ET-A40T-01A-11R-A23N-07	0	1140	High	0
TCGA-ET-A4KN-01A-11R-A250-07	0	1009	Low	1.60507
TCGA-ET-A4KQ-01A-12R-A250-07	0	955	High	0
TCGA-FE-A22Z-01A-11R-A16R-07	1	1215	Low	1.60507
TCGA-FE-A230-01A-11R-A14Y-07	1	526	Low	0.658232
TCGA-FE-A231-01A-11R-A14Y-07	0	961	Low	1.35865
TCGA-FE-A232-01A-11R-A14Y-07	0	2424	Low	0.904653
TCGA-FE-A233-01A-11R-A14Y-07	1	567	Low	0.658232
TCGA-FE-A234-01A-11R-A14Y-07	1	483	Low	0.658232
TCGA-FE-A235-01A-11R-A16R-07	0	3571	Low	0.658232
TCGA-FE-A236-01A-11R-A16R-07	0	2031	Low	0.658232
TCGA-FE-A237-01A-11R-A16R-07	1	492	Low	0.904653
TCGA-FE-A238-01A-11R-A16R-07	1	431	Low	0.904653
TCGA-FE-A239-01A-11R-A16R-07	1	933	High	0.700418
TCGA-FE-A23A-01A-11R-A16R-07	0	2489	Low	0.658232
TCGA-FE-A3PA-01A-12R-A220-07	0	3235	Low	0.904653
TCGA-FE-A3PB-01A-11R-A220-07	0	2590	Low	0.904653
TCGA-FE-A3PC-01A-11R-A220-07	0	2606	High	0
TCGA-FE-A3PD-01A-11R-A220-07	0	2396	High	0
TCGA-FK-A3S3-01A-11R-A22L-07	0	2162	High	0.246421
TCGA-FK-A3SB-01A-11R-A22L-07	0	125	High	0.246421
TCGA-FK-A3SD-01A-11R-A22L-07	0	32	High
TCGA-FK-A3SE-01A-11R-A22L-07	0	670	Low	0.658232
TCGA-FK-A3SG-01A-11R-A22L-07	0	28	High	0
TCGA-FK-A3SH-01A-11R-A22L-07	0	1463	Low	1.35865
TCGA-FK-A4UB-01A-11R-A250-07	0	3531	High	0.946839
TCGA-FY-A2QD-01A-11R-A19O-07	0	38	High
TCGA-FY-A3BL-01A-11R-A19O-07	0	621	Low	0.658232
TCGA-FY-A3I4-01A-11R-A21D-07	0	542	High	0
TCGA-FY-A3I5-01B-11R-A220-07	0	238	High	0.700418
TCGA-FY-A3NM-01A-11R-A21D-07	0	885	High	0.946839
TCGA-FY-A3NN-01A-11R-A21D-07	0	0	Low	1.35865
TCGA-FY-A3NP-01A-11R-A21D-07	0	491	High	0
TCGA-FY-A3ON-01A-11R-A220-07	0	595	High	0
TCGA-FY-A3R6-01A-11R-A220-07	0	423	Low	1.35865
TCGA-FY-A3R7-01A-11R-A220-07	0	495	High	0.946839
TCGA-FY-A3R8-01A-11R-A220-07	0	477	Low	1.60507
TCGA-FY-A3R9-01A-11R-A220-07	0	504	High	0
TCGA-FY-A3RA-01A-11R-A220-07	0	550	High	0
TCGA-FY-A3TY-01A-11R-A22U-07	0	709	Low	1.60507
TCGA-FY-A3W9-01A-11R-A22L-07	0	658	High	0
TCGA-FY-A3WA-01A-11R-A22L-07	0	519	High	0
TCGA-FY-A3YR-01A-11R-A22U-07	0	528	Low	1.60507
TCGA-FY-A40K-01A-11R-A23N-07	0	461	High	0
TCGA-FY-A40L-01A-11R-A23N-07	0	726	Low	1.60507
TCGA-FY-A40M-01A-11R-A23N-07	0	684	High	0
TCGA-FY-A40N-01A-11R-A23N-07	0	579	High	0
TCGA-FY-A4B0-01A-21R-A23W-07	0	420	High	0
TCGA-FY-A4B3-01A-11R-A23W-07	0	427	High	0.946839
TCGA-FY-A4B4-01A-11R-A23W-07	0	657	Low	1.35865
TCGA-FY-A76V-01A-11R-A39I-07	0	51	High	0
TCGA-GE-A2C6-01A-11R-A16R-07	0	381	High	0
TCGA-H2-A26U-01A-11R-A16R-07	0	517	Low	1.60507
TCGA-H2-A2K9-01A-11R-A180-07	0	659	High	0
TCGA-H2-A3RH-01A-11R-A220-07	0	379	High	0
TCGA-H2-A3RI-01A-11R-A220-07	1	279	Low	0.904653
TCGA-H2-A421-01A-11R-A23N-07	0	610	Low	0.658232
TCGA-H2-A422-01A-11R-A23N-07	0	566	Low	0.658232
TCGA-IM-A3EB-01A-11R-A206-07	0	1488	Low	0.904653
TCGA-IM-A3ED-01A-11R-A206-07	0	1442	Low	0.658232
TCGA-IM-A3U2-01A-21R-A22L-07	0	563	Low	1.60507
TCGA-IM-A3U3-01A-11R-A22L-07	0	514	Low	0.658232
TCGA-IM-A41Y-01A-11R-A23W-07	0	664	High	0.246421
TCGA-IM-A41Z-01A-11R-A23N-07	0	946	High	0
TCGA-IM-A420-01A-11R-A23N-07	0	250	Low	0.658232
TCGA-IM-A4EB-01A-11R-A250-07	0	780	Low	0.904653
TCGA-J8-A3NZ-01A-11R-A21D-07	0	524	Low	1.60507
TCGA-J8-A3O0-01A-11R-A21D-07	0	1313	High	0
TCGA-J8-A3O1-01A-11R-A21D-07	0	827	Low	0.658232
TCGA-J8-A3O2-01A-11R-A23N-07	0	342	High	0.246421
TCGA-J8-A3YD-01A-11R-A22U-07	0	968	High	0.700418
TCGA-J8-A3YE-01A-12R-A23N-07	0	847	High	0.246421
TCGA-J8-A3YF-01A-12R-A23N-07	0	751	Low	1.35865
TCGA-J8-A3YG-01A-11R-A22U-07	0	678	Low	1.35865
TCGA-J8-A3YH-01A-11R-A22U-07	0	175	High	0
TCGA-J8-A42S-01A-11R-A23N-07	0	75	High	0.700418
TCGA-J8-A4HW-01A-11R-A250-07	0	79	High	0.700418
TCGA-J8-A4HY-01A-11R-A250-07	0	6	Low	1.60507
TCGA-KS-A41F-01A-11R-A23N-07	0	4367	Low	0.658232
TCGA-KS-A41I-01A-11R-A23N-07	0	486	Low	0.658232
TCGA-KS-A41J-01A-11R-A23N-07	0	477	Low	0.658232
TCGA-KS-A41L-01A-11R-A23N-07	0	3463	High	0
TCGA-KS-A4I1-01A-11R-A250-07	0	812	Low	0.658232
TCGA-KS-A4I3-01A-11R-A250-07	0	1329	Low	0.904653
TCGA-KS-A4I5-01A-11R-A250-07	0	567	High	0.700418
TCGA-KS-A4I7-01A-11R-A250-07	0	987	High	0
TCGA-KS-A4I9-01A-11R-A250-07	0	2658	Low	0.658232
TCGA-KS-A4IB-01A-11R-A250-07	0	2577	Low	0.658232
TCGA-KS-A4IC-01A-11R-A250-07	0	1073	Low	1.35865
TCGA-KS-A4ID-01A-11R-A250-07	0	1011	Low	0.658232
TCGA-L6-A4EP-01A-11R-A250-07	0	1016	Low	0.658232
TCGA-L6-A4EQ-01A-11R-A250-07	0	1228	Low	1.35865
TCGA-L6-A4ET-01A-11R-A250-07	0	664	High	0.700418
TCGA-L6-A4EU-01A-11R-A250-07	0	289	Low	1.60507
TCGA-MK-A4N6-01A-11R-A250-07	0	1098	Low
TCGA-MK-A4N7-01A-11R-A250-07	0	987	High	0
TCGA-MK-A4N9-01A-11R-A250-07	0	919	High	0.246421
TCGA-MK-A84Z-01A-11R-A39I-07	0	728	High
TCGA-QD-A8IV-01A-11R-A39I-07	0	392	High	0.946839

## Sheet: qPCR results
	GAPDH				BTNL9				2^(-ΔΔCt)
Sample	rep1	rep2	rep3		rep1	rep2	rep3		rep1	rep2	rep3	AVERAGE	STDEV
Donor1-P	16.6869	16.5552	16.6529		24.389	24.9272	25.4456		1.44552	0.995444	0.694957	1.04531	0.30844
Donor1-T	16.8917	16.8348	16.8839		26.1456	25.9714	26.7824		0.504671	0.569456	0.324579	0.466235	0.103599
Donor2-P	17.4122	17.3645	17.4809		25.7987	25.825	25.7963		1.00556	0.987346	1.00722	1.00004	0.00900212
Donor2-T	17.4268	17.3408	17.3306		26.2483	26.164	26.5185		0.709661	0.752402	0.588467	0.68351	0.0694337
Donor3-P	20.8633	20.8747	20.8762		28.0793	27.8776	27.7337		0.881233	1.01343	1.11974	1.0048	0.0975591
Donor3-T	17.9551	17.9215	17.9446		28.229	27.479	28.206		0.104161	0.175177	0.105834	0.128391	0.0330899
Donor4-P	15.998	16.0363	15.959		27.5473	27.6281	27.8837		1.10118	1.04121	0.872172	1.00486	0.0969632
Donor4-T	15.6799	15.5807	15.7164		26.7807	26.6725	26.8913		1.48137	1.59667	1.37205	1.48336	0.091709
Donor5-P	17.1153	16.9926	17.2391		25.6738	25.5995	25.5448		0.954098	1.00458	1.04334	1.00067	0.0365362
Donor5-T	16.909	16.8918	16.8493		26.2811	26.3384	26.3465		0.533176	0.512414	0.509527	0.518372	0.0105341
Donor6-P	16.3298	16.2493	16.3154		26.084	26.2218	26.0542		1.02526	0.931881	1.04666	1.00127	0.0498349
Donor6-T	17.0485	16.9887	17.1033		26.5147	26.2231	26.5494		1.27813	1.56441	1.24776	1.36343	0.142651
Donor7-P	16.5513	16.4109	16.5909		26.5306	27.536	27.3449		1.52262	0.758482	0.86589	1.049	0.337761
Donor7-T	16.766	16.7415	16.8707		28.0959	29.5481	28.8079		0.622572	0.227521	0.38006	0.410051	0.162667
Donor8-P	17.2154	17.2612	17.279		25.477	25.3396	25.5564		0.986676	1.0853	0.933846	1.00194	0.0627664
Donor8-T	17.2998	17.3778	17.4376		26.7629	26.9193	26.8521		0.372407	0.334129	0.350079	0.352205	0.0156993
Donor9-P	17.5667	17.531	17.6296		26.4532	26.5309	26.6413		1.06334	1.0076	0.933336	1.00143	0.053255
Donor9-T	17.0169	17.1344	17.1364		25.8782	25.8725	25.9741		1.13585	1.14029	1.0628	1.11298	0.0355285
Donor10-P	18.8788	18.8677	18.7479		27.6965	27.7486	27.5896		0.987418	0.952381	1.06338	1.00106	0.0463297
Donor10-T	18.2428	18.3279	18.378		28.0396	28.1855	27.9812		0.517627	0.496262	0.591951	0.53528	0.0410107
Donor11-P	15.8068	15.8852	15.813		24.3309	24.4435	24.3848		1.03921	0.961226	1.00109	1.00051	0.0318394
Donor11-T	18.2295	18.2323	18.2905		27.6474	27.6376	27.5919		0.548458	0.55329	0.59461	0.565453	0.0207115
Donor12-P	17.6046	17.5517	17.5236		27.2886	27.0642	27.1845		0.926893	1.0829	0.996284	1.00202	0.0638174
Donor12-T	18.3394	18.3901	18.4388		28.5816	28.8408	28.9356		0.649264	0.561933	0.544227	0.585141	0.0459139
Donor13-P	17.2704	17.0377	17.3434		25.5808	25.4938	25.5309		0.968846	1.02909	1.00298	1.00031	0.0246677
Donor13-T	16.4318	16.4926	16.4448		26.1103	26.1147	26.1035		0.389435	0.404965	0.394834	0.396411	0.00643753
Donor14-P	17.1967	17.1769	17.1459		25.0724	24.9727	25.0343		0.968677	1.03796	0.994582	1.00041	0.0285828
Donor14-T	17.3672	17.4265	17.2713		25.6146	25.6159	25.5468		0.760942	0.79219	0.746285	0.766472	0.0191441
Donor15-P	18.2158	18.0963	18.1136		27.6629	27.574	27.3995		0.921813	0.980409	1.1065	1.00291	0.0770566
Donor15-T	19.7444	19.2414	19.2873		29.5794	29.2115	29.1216		0.741524	0.675253	0.741832	0.719536	0.0313132
Donor16-P	17.3331	17.1759	16.9781		26.1467	26.4703	26.4265		1.14961	0.918599	0.946939	1.00505	0.102874
Donor16-T	17.9096	17.6605	17.8559		28.4727	28.2526	28.4418		0.384834	0.377177	0.378819	0.380277	0.00329152
Donor17-P	17.5245	17.0044	17.3789		26.4083	26.0529	26.3072		0.899894	1.15127	0.965233	1.00547	0.106493
Donor17-T	17.004	17.1067	17.0917		27.2007	27.3157	27.3841		0.422456	0.418883	0.395342	0.412227	0.0120284
Donor18-P	16.6936	16.6085	16.5071		25.9471	25.9806	26.0908		1.04178	1.01789	0.943026	1.0009	0.0420686
Donor18-T	17.4884	17.5869	17.51		27.8176	28.1667	28.1689		0.52627	0.442352	0.418757	0.46246	0.0461376
Donor19-P	17.7686	17.7679	17.7269		26.1722	26.1808	26.0579		0.975872	0.97007	1.05634	1.00076	0.0393719
Donor19-T	19.4457	19.3589	19.6		28.9182	28.9662	29.017		0.469774	0.427843	0.488197	0.461938	0.0252545
Donor20-P	17.007	17.061	16.8415		25.6957	25.496	25.4347		0.899032	1.0325	1.0773	1.00294	0.0757175
Donor20-T	17.7793	17.8861	17.2329		26.6077	27.4048	26.841		0.57335	0.481896	0.767076	0.607441	0.118894
Donor21-P	17.357	17.1698	17.1758		26.6116	26.4507	26.4983		0.938613	1.04933	1.01532	1.00109	0.0463056
Donor21-T	17.8877	18.0132	17.6077		26.7613	26.9688	26.5708		1.33091	1.25742	1.25078	1.2797	0.0363097
Donor22-P	17.8875	17.9233	17.7914		26.7666	26.7423	26.592		0.955088	0.971311	1.07795	1.00145	0.0544968
Donor22-T	17.2259	17.132	16.9901		28.669	28.6662	28.4056		0.163771	0.153756	0.166935	0.161487	0.0056174
Donor23-P	17.2521	17.2267	17.3746		28.6984	28.5565	28.7452		0.978295	1.07936	0.947028	1.00156	0.0564747
Donor23-T	16.7068	16.7435	16.5953		29.9731	29.6084	29.9414		0.250781	0.348857	0.284081	0.294573	0.0407212
Donor24-P	17.6568	17.377	17.4158		25.7733	25.5685	25.6448		0.925869	1.0671	1.01215	1.00171	0.0581287
Donor24-T	16.2771	16.4026	16.388		26.7814	26.8112	26.7143		0.199541	0.213227	0.225739	0.212836	0.0106987
Donor25-P	16.6522	16.7202	16.7359		26.1695	26.2288	26.3301		1.05214	1.00974	0.941273	1.00105	0.0456777
Donor25-T	16.366	16.1288	15.9032		26.6426	26.8672	26.935		0.600161	0.435767	0.355581	0.463836	0.101803
Donor26-P	16.366	16.2984	16.5717		26.1343	26.1432	26.4381		1.07493	1.0683	0.870814	1.00468	0.0946981
Donor26-T	16.2107	16.3009	16.2875		26.163	25.9845	26.0821		0.916511	1.10406	1.02236	1.01431	0.0767775
Donor27-P	17.3743	17.4124	17.4481		27.982	27.9601	27.9002		0.976345	0.991231	1.03329	1.00029	0.024113
Donor27-T	17.156	16.9593	16.8295		27.128	27.2304	27.0827		1.28984	1.37696	1.21643	1.29441	0.0656133
Donor28-P	16.3225	16.6858	16.4948		26.1631	26.6004	26.3435		1.15341	0.851794	1.01784	1.00768	0.123344
Donor28-T	16.1664	15.904	15.96		26.8135	26.7513	26.7664		0.485811	0.608408	0.521792	0.53867	0.0514536
Donor29-P	17.5152	17.2343	17.0789		27.6162	27.1482	27.0496		0.787399	1.0891	1.1661	1.0142	0.163426
Donor29-T	16.4569	16.3579	16.5074		27.8599	27.9101	27.7976		0.39029	0.363994	0.367426	0.373903	0.0116717
Donor30-P	16.6815	16.8258	16.9669		25.0304	25.2713	25.2631		1.11563	0.944074	0.949455	1.00305	0.0796342
Donor30-T	17.737	17.58	17.6142		26.8558	26.9383	26.681		0.544133	0.559525	0.599833	0.56783	0.0234856

## Sheet: File Information
(1) The risk score list of the Cox regression analysis. (2) The original data of the qRT-PCR results.
